# Supplementary material for: Biomolecular Events in Cancer Revealed by Attractor Metagenes
Source: PLoS Comput Biol. 2013 Feb 21;9(2):e1002920. doi: 10.1371/journal.pcbi.1002920 (PMC3581797; doi:10.1371/journal.pcbi.1002920)
Supplement: Table S1 — General attractors identified from the six datasets. (XLS) [file pcbi.1002920.s001.xls]

## Sheet: Sheet1
Rank	Cluster ID	Number of Existed Datasets	Minimum Strength
Dataset	Genes
1	Lymphocypte-Specific Attractor	6	0.737169
brca.gse2034	PTPRC	CD3D	CD48	DOCK2	CD53	ARHGAP25	LCP2	CORO1A	IRF8	IL10RA	LCK	GZMK	CYTIP	EVI2B	GMFG	IL2RG	GZMA	CD52	PTPRCAP	SASH3	PRKCB	SELL	CD2	IL7R	LPXN	PVRIG	ARHGAP15	FGL2	PLAC8	HCLS1	PPP1R16B	HLA-DMB	GPR171	SRGN	CCR7	CCR5	NCF4	GPR18	RAC2	MAP4K1	GIMAP4	CD27	LTB	CST7	PRF1	CD8A	APOBEC3G	CCR2	TNFRSF1B
brca.tcga	CD5	CD3D	CD2	SH2D1A	SIT1	TBC1D10C	CD247	CD48	TRAT1	PVRIG	ITK	SAMD3	S1PR4	IL2RG	RGL4	CD6	PRKCB	LCK	UBASH3A	PTPN7	CD3G	PTPRCAP	CD96	PTPRC	EOMES	SLAMF1	LCP2	SLA2	PDCD1	CXCR3	SASH3	IL10RA	BTLA	CCR2	KLHL6	SIRPG	CD52	CST7	SPOCK2	HCLS1	ZNF831	PSTPIP1	LAT	ICOS	CD53	ARHGAP30	SLAMF7	GPR18	GPR171
coad.gse14333	TYROBP	LAPTM5	FCER1G	LY96	CD163	ITGB2	C1QC	CD86	MS4A6A	C1QB	TNFSF13B	FPR3	SLAMF8	GPNMB	CLEC2B	CLEC7A	TFEC	MARCH1	C1orf162	EVI2A	MS4A4A	MNDA	CYBB	C3AR1	DOCK2	MS4A7	HCK	MAFB	ITGAM	NCF2	CD53	WIPF1	MRC1	SLA	PLXNC1	TLR8	ST8SIA4	C1QA	HCLS1	CD14	SLC31A2	HAVCR2	CLEC4A	CCR1	FCGR2B	SAMSN1	CSF1R	MPEG1	TM6SF1
coad.tcga	LAPTM5	SLA	FPR3	C1orf162	LAIR1	STX11	ITGB2	LRRC25	CYBB	HCK	C3AR1	TFEC	FAM49A	CD300LF	NLRC4	DOK2	PTPRC	NCF1	TLR8	SASH3	HCST	CD53	PLEK	TNFAIP8L2	FCGR2B	CD300A	TNFSF13B	AIF1	LCP2	SRGN	CLEC4A	HAVCR2	MSR1	SIGLEC7	TAGAP	SUCNR1	CD37	GPR65	SLAMF8	GIMAP4	MNDA	SIGLEC9	MS4A4A	FCER1G	NCF2	SAMSN1	MARCH1	CD84	TLR1
ov.gse9891	LCP2	PTPRC	CD86	DOCK2	SAMSN1	EVI2B	LAPTM5	CD48	CD53	FYB	ARHGAP15	LAIR1	MS4A6A	PLEK	CYBB	EVI2A	MNDA	C3AR1	GIMAP6	CD84	MPEG1	FCER1G	GIMAP4	IL10RA	GPR65	TFEC	TNFSF13B	CSF2RB	TYROBP	HCK	RCSD1	CD2	CTSS	GMFG	RNASE6	SASH3	CD37	NCF4	CCR5	ITGAM	LY96	MYO1F	FERMT3	MARCH1	CCR1	FCGR2A	IKZF1	SLA	GIMAP1
ov.tcga	CD53	FCER1G	MS4A6A	C1QB	C1QA	CYBB	GIMAP4	C3AR1	AIF1	PTPRC	LCP2	LAPTM5	PLEK	SAMSN1	RNASE6	IL10RA	TYROBP	ITGB2	CD86	FCGR2A	EVI2B	GPR65	CD14	FCGR1A	LY86	LAIR1	CD163	TFEC	EVI2A	CD48	CSF1R	CLEC7A	FCGR2B	GMFG	VSIG4	HCK	SRGN	SASH3	FYB	DOCK2	GIMAP6	MS4A4A	LST1	SLA	FGL2	ALOX5AP	ARHGAP15	ITGAM	CD37
Top genes:	CD53:6	PTPRC:5	LCP2:5	SASH3:5	CD48:4	DOCK2:4	IL10RA:4	GIMAP4:4	LAPTM5:4	FCER1G:4	TFEC:4	CYBB:4	C3AR1:4	HCK:4	SLA:4	SAMSN1:4	EVI2B:3	GMFG:3	CD2:3	ARHGAP15:3
2	Mesenchymal Transition Attractor	6	0.677723
brca.gse2034	COL5A2	COL1A2	COL3A1	SPARC	FSTL1	CTSK	COL6A3	FBN1	VCAN	COL1A1	CDH11	COL5A1	MMP2	CRISPLD2	AEBP1	FAP	DCN	HTRA1	THBS2	GLT8D2	ANGPTL2	POSTN	LAMB1	MXRA5	LOX	ADAM12	SERPINF1	PCOLCE	EFEMP2	THY1	TCF4	BGN	SPON1	LUM	ASPN	OLFML2B	LRRC15	DACT1	COL8A2	PDGFRB	PALLD	ISLR	SRPX2	NNMT	MXRA8	NID2	PDGFRA	ZEB1	MYL9
brca.tcga	GLT8D2	FAP	VCAN	COL1A2	COL6A3	THBS2	COL5A2	SPARC	COL5A1	ADAM12	POSTN	FBN1	AEBP1	COL1A1	DACT1	BNC2	CTSK	CDH11	COL6A2	SERPINF1	SRPX2	PCOLCE	SPON1	SFRP2	LUM	LRRC15	WISP1	SGCD	NOX4	PRRX1	DCN	FIBIN	HTRA1	THY1	P4HA3	NDN	MAGEL2	FSTL1	PPAPDC3	MMP2	HMCN1	LOXL1	MSRB3	TSHZ3	FAM26E	ECM2	PDGFRB	RARRES2	ANGPTL2
coad.gse14333	FBN1	SPARC	GLT8D2	TIMP2	THY1	RAB31	SERPINF1	AEBP1	DCN	ANTXR1	EFEMP2	FSTL1	VCAN	COL6A2	COL5A1	RAB34	COL3A1	COL5A2	FRMD6	FNDC1	VIM	COL6A3	SDC2	CDH11	OLFML2B	ZNF521	CMTM3	RCN3	IGFBP7	GPC6	BGN	COL1A2	MXRA8	HTRA1	CTHRC1	PDGFRB	MITF	MSRB3	HEG1	SNAI2	NNMT	SULF1	LOXL1	SERPING1	PCOLCE	CTSK	ENTPD1	PDGFC	TCF4
coad.tcga	ANTXR1	SPARC	SULF1	THBS2	COL5A2	COL6A2	BGN	RAB31	MMP2	GLI3	LUM	VEGFC	COL1A2	NNMT	PCOLCE	FSTL1	VCAN	CDH11	DCN	CCDC80	EFEMP2	MXRA8	MSRB3	SERPINF1	FAP	SPOCK1	GAS1	CTHRC1	FAM110B	NOX4	TSHZ3	AEBP1	FBN1	CTSK	DDR2	ADAM12	C1S	COL12A1	DNAJB5	SGCD	ANGPTL2	COL11A1	RAB34	SNAI2	CNRIP1	RCN3	PPAPDC3	SYNDIG1	TSPYL5
ov.gse9891	THBS2	FAP	VCAN	COL5A2	INHBA	COL5A1	FBN1	COL3A1	COL11A1	FN1	PRRX1	COL10A1	CTSK	COL1A1	COL1A2	SPARC	AEBP1	SERPINF1	CRISPLD2	LUM	ADAM12	POSTN	CCDC80	LOX	CTHRC1	LRRC15	TNFAIP6	RAB31	COPZ2	SNAI2	SFRP2	PMP22	ANTXR1	ALPK2	TMEM158	MMP2	PRKG1	ACTA2	OLFML2B	VGLL3	WISP1	PLAU	EPYC	GREM1	GJB2	MMP11	ASPN	ADAMTS2	NUAK1
ov.tcga	COL5A1	COL5A2	COL1A1	VCAN	THBS2	LUM	FAP	CTSK	AEBP1	FBN1	SPARC	COL6A3	COL1A2	COL3A1	CDH11	MMP2	ECM1	LRRC15	COL10A1	COL6A2	SERPINF1	INHBA	SNAI2	CRISPLD2	DCN	OLFML2B	COL11A1	FN1	MMP11	ASPN	COLEC12	COPZ2	FILIP1L	POSTN	PLAU	GLT8D2	ACTA2	THBS1	NTM	TIMP3	HEPH	SFRP4	PDGFRB	EPYC	VCAM1	PCOLCE	EDNRA	ITGBL1	ADAM12
Top genes:	COL5A2:6	COL1A2:6	SPARC:6	CTSK:6	FBN1:6	VCAN:6	AEBP1:6	SERPINF1:6	CDH11:5	COL5A1:5	MMP2:5	FAP:5	DCN:5	THBS2:5	POSTN:5	ADAM12:5	PCOLCE:5	LUM:5	COL3A1:4	FSTL1:4
3	Mitotic CIN Attractor	6	0.569788
brca.gse2034	CENPA	CEP55	ASPM	KIF4A	DLGAP5	CDC20	UBE2C	PRC1	KIF2C	CCNB2	FOXM1	BUB1B	AURKA	MELK	CCNB1	CCNA2	NCAPG	KIF20A	HJURP	KIF14	NUSAP1	BUB1	STIL	NDC80	TTK	KIF11	RACGAP1	RAD51AP1	TPX2	KIF15	ZWINT	NEK2	EZH2	NCAPH	MAD2L1	TRIP13	GINS1	RRM2	CDKN3	CDK1	CENPF	CENPE	DSCC1	CDC45	MKI67	CENPN	ESPL1	PBK	CKS2
brca.tcga	TPX2	CCNB2	CDCA8	CENPA	MELK	KIF2C	MCM10	HJURP	TTK	EXO1	FOXM1	AURKB	NDC80	CCNA2	CENPI	CDCA3	CDCA5	KIF4A	DLGAP5	CENPE	C15orf42	KIF11	BUB1B	CDC20	UBE2C	CDC45	FAM83D	DEPDC1B	PTTG3P	CEP55	KIF20A	MYBL2	ANLN	BUB1	KIF4B	RAD51	DEPDC1	PTTG1	ARHGAP11A	FAM54A	GTSE1	CENPN	NCAPH	NUSAP1	FAM64A	KIF15	ORC1	KIF23	PLK1
coad.gse14333	BUB1B	CCNB1	NCAPG	CDK1	CEP55	CENPA	KIF20A	CCNA2	RRM2	DLGAP5	ZWINT	BIRC5	BUB1	MELK	AURKB	CCNB2	CDC20	KIF11	FEN1	E2F8	TTK	DEPDC1	HJURP	UBE2T	NUSAP1	NEK2	CDC45	CDCA5	PARPBP	PRC1	KIF23	KIF2C	RNASEH2A	PLK1	CHEK1	TK1	RAD51	FANCI	EXO1	CDCA3	DTL	ASPM	DBF4	KIF4A	NUF2	RACGAP1	STIL	MAD2L1	NCAPH
coad.tcga	BUB1	CCNB1	CCNA2	CDK1	CENPA	SPC25	KIF18A	KIF23	MCM10	CCDC99	KIF20A	CCNB2	DLGAP5	PTTG1	MELK	TTK	EXO1	SHCBP1	DEPDC1	FAM54A	DEPDC1B	MAD2L1	HMMR	POLE2	PTTG3P	FBXO5	CDC20	NCAPH	OIP5	BIRC5	RFC4	SMC4	PTTG2	ORC1	NEK2	RACGAP1	CDC25C	UBE2T	STIL	HJURP	PARPBP	KIF2C	HELLS	SGOL2	CDC45	MASTL	CDCA8	KIF11	NUSAP1
ov.gse9891	BUB1	TPX2	KIF14	UBE2C	FAM83D	NCAPH	TTK	KIF2C	MELK	NUF2	DLGAP5	KIF20A	CDCA5	KIF4A	FOXM1	CEP55	KIF15	DEPDC1	BIRC5	AURKA	CENPA	NCAPG	HJURP	MKI67	PRC1	CCNB2	CDCA3	OIP5	CDKN3	AURKB	CCNA2	CDK1	KIF23	CENPF	RACGAP1	TROAP	NEK2	NUSAP1	CENPE	ASPM	KIF11	MYBL2	SPC25	HMMR	ZWINT	TOP2A	ANLN	GTSE1	POLQ
ov.tcga	KIF4A	DLGAP5	CENPA	CDK1	KIF2C	MELK	NCAPH	TPX2	RACGAP1	AURKB	TOP2A	ASPM	KIF20A	NDC80	AURKA	KIF15	HJURP	BUB1	KIF23	TTK	UBE2C	BIRC5	CCNB1	CDC20	CDCA3	KIFC1	BUB1B	NEK2	PRC1	CDKN3	MYBL2	CDCA8	FBXO5	CCNA2	ERCC6L	MCM10	NUSAP1	STIL	KIF11	KPNA2	KIF14	CCNB2	PLK1	DEPDC1	ECT2	CEP55	E2F8	CENPF	NCAPG
Top genes:	CENPA:6	DLGAP5:6	KIF2C:6	CCNB2:6	MELK:6	CCNA2:6	KIF20A:6	HJURP:6	NUSAP1:6	BUB1:6	TTK:6	KIF11:6	NCAPH:6	CEP55:5	KIF4A:5	CDC20:5	RACGAP1:5	NEK2:5	CDK1:5	DEPDC1:5
4	ID37	6	0.515779
brca.gse2034	TRIM10	DRD2	SFTPC	MUC3A	CAMK2A	TUB	HTR4	BTNL3	MASP1	PADI1	BCAN	HNF4A	PAX3	GLP1R	C1orf222	GRIN1	ATF6B	CYP3A43	PKLR	GJB4	PRODH2	PNLIPRP1	HRH3	ITGB3	DSCAM	SFTPB	XPNPEP2	SPTB	TRIM15	PIK3R5	ADRA1A	NR1I2	PRDM14	ACCN4	TBXA2R	C22orf26	NCR1	CACNA1G	GUCA2A	ESR2	PRDM11	NR6A1	NOS1	GYPB	GSK3A	GPX5	HAP1	PTCRA	SLC45A2
brca.tcga	APOA1	AHSG	TM4SF5	APOA2	HBE1	APOC3	HBZ	HBG1	F2	PRODH2	MYL4	ALAS2	DCT	TYR	PMEL	ITIH3	GATA1	FABP1	APOB	GDF3	ASGR2	HEMGN	ITIH2	LIN28A	PASD1	DPPA4	RHAG	POU5F1	RHOXF2B	SERPIND1	ITGB7	CPS1	ASGR1	POU5F1P4	POU5F1P3	AMBP	TTR	DSCAM	ACF	NR0B2	SERPINA7	RPS4Y1	IGFBP1	MAL	AJAP1	FOSL1	TRIML2	FXYD2	MLANA
coad.gse14333	AHSG	DIO1	GC	TF	APOA1	SLC2A2	SERPINC1	APOH	FGA	AKR1D1	FGG	CFHR5	ALB	VTN	APOA2	LOC100507203	ORM2	APOC3	AFP	CPB2	ITIH2	HPX	FGL1	ASGR2	HPR	FGB	TTR	BPIFB2	APOB	ZIC1	ELOVL2	LOC400043	APOM	RFX6	AMBP	GPC3	PGC	LBP	LINC00176	SERPINA5	PLG	ACSM2A	GREB1	GATA5	MBNL3	CFHR2	RELN	F13B	SLC17A2
coad.tcga	DLK1	RHOXF2B	AHSG	APOA1	HBZ	HBE1	ALAS2	PMEL	ITIH3	ITIH2	HBG1	ITGB7	TRIML2	DPPA4	GDF3	APOC3	APOA2	DHRS2	AFP	MAL	TF	SIX6	DCT	AMBP	APOB	WISP2	AJAP1	SLC34A3	SERPIND1	FST	EEF1A2	IGDCC3	GIPR	PRODH2	FOXD4L1	LTB4R2	ZDHHC8	GATA3	PRAME	ASGR2	UTF1	SERPINA5	HAMP	MYL4	FGG	KISS1R	ORM2	FOXD3	SPANXD
ov.gse9891	APOA2	AFP	APOB	AHSG	SULT2A1	LINC00483	PLA2G12B	APOC3	C19orf69	LOC100507203	SLC2A2	VTN	ABCC2	HNF4A	APOBEC1	KNG1	C10orf112	TTR	TRIM31	AKR1D1	A1CF	TAC3	HSD3B1	FGA	CYP2W1	HAVCR1	MUC17	EPS8L3	SLC17A4	MTTP	IYD	FLJ22763	RBP2	PAH	RNF186	TRPM6	ALDOB	MUC12	SLC39A5	S100G	ISX	XPNPEP2	LRRC19	APOM	CHST13	GUCY2C	FABP1	PRAP1	SULT1B1
ov.tcga	CTRC	CLPS	CPA2	SULT2A1	CLDN18	CELA3B	CELA3A	ALB	CELP	CPA1	PLA2G1B	RBPJL	ACAN	AMBP	MEP1A	AFP	FGG	FGA	APOH	GC	POMC	SERPINA4	GFRA3	INSM1	SCGN	DNASE1	CTNND2	GP2	APOC3	MSMB	IL22RA1	DPEP1	ITIH2	SFRP5	VIL1	PRSS3	RNF186	ONECUT1	STAT4	RAB3B	AGXT	BFSP1	TTN	NR5A2	AGTR1	APOB	DUSP9	NR0B2	C5
Top genes:	APOC3:5	APOB:5	AHSG:4	APOA2:4	ITIH2:4	AMBP:4	AFP:4	PRODH2:3	APOA1:3	ASGR2:3	TTR:3	FGA:3	FGG:3	HNF4A:2	DSCAM:2	XPNPEP2:2	HBE1:2	HBZ:2	HBG1:2	MYL4:2
5	ID51	6	0.406477
brca.gse2034	MX1	IFI44L	IFIT1	IFI44	ISG15	IFIT3	OAS1	IFI6	RSAD2	HERC6	OAS3	IFIH1	IFI27	OASL	DDX60	USP18	HERC5	STAT1	MX2	DDX58	IRF7	PARP12	PLSCR1	RTP4	SAMD9	OAS2	IFIT5	XAF1	IRF9	IFITM1	CXCL11	IFI35	TAP1	UBE2L6	CXCL10	PSMB9	EIF2AK2	SIGLEC1	HLA-F	LAP3	SP110	CCL8	SP100	TRIM22	LY6E	LAMP3	BST2	PSMB8	ISG20
brca.tcga	IFIT3	IFI44L	IFIT1	ISG15	XAF1	OASL	MX1	IFI44	OAS1	OAS2	IFI6	HERC6	RSAD2	IFIT2	OAS3	STAT1	IFI27	IFIH1	DDX58	ZBP1	BATF2	PARP14	MX2	USP18	IFIT5	RTP4	DDX60	HERC5	TRIM21	IRF9	PLSCR1	PSMB9	EPSTI1	UBE2L6	TAP1	SAMD9	IFITM1	HLA-B	PARP9	TRIM22	HLA-C	SP110	CXCL11	IL28A	B2M	LGALS9	SAMD9L	HLA-F	HCP5
coad.gse14333	IFI44L	IFI44	RSAD2	IFIT3	IFIT1	MX1	ISG15	OAS2	CMPK2	XAF1	DDX58	MX2	BST2	IFIT2	USP18	SAMD9L	PARP9	IFI6	IRF7	HERC6	STAT1	IRF9	IFIT5	HERC5	SP110	SAMD9	SP100	IFIH1	DDX60	PARP14	OAS3	TNFSF13B	SAMHD1	GBP1	CXCL10	CCL8	UBE2L6	OASL	EPSTI1	TRIM22	IFI35	RARRES3	IFI16	TYMP	LAMP3	CCR1	C1QC	LY6E	SLC15A3
coad.tcga	HLA-C	HLA-A	HLA-E	HLA-G	HLA-F	HLA-B	PSMB9	TAP1	HCP5	BTN3A1	BTN3A3	IRF1	PSMB8	ETV7	BATF2	IL15RA	TAPBP	B2M	GPR119	RHBDL1	CD209	TNFRSF14	CD74	C19orf66	IL32	NLRC5	GBP4	GBP2	BTN3A2	BTN2A2	EPSTI1	NMI	UBE2L6	HLA-DMB	OPTN	C1QB	JAK2	RARRES3	XRN1	SP110	IFI27	HLA-DMA	CASP10	C1QA	PARP14	HLA-DPA1	GBP1	TRIM38	UBD
ov.gse9891	RSAD2	IFIT3	CMPK2	IFIT1	OASL	OAS2	ISG15	OAS1	OAS3	IFI44L	IFIT2	IFI44	MX1	SAMD9L	IFIH1	STAT1	EPSTI1	LAMP3	HERC5	SAMD9	XAF1	CXCL10	PARP9	DDX58	PARP14	UBE2L6	SP110	PSMB9	DDX60	HERC6	MX2	IFI6	CCL8	CXCL11	PLSCR1	TAP1	IFI27	GBP1	USP18	SLC15A3	DDX60L	PARP12	DTX3L	IFI35	IRF7	TMEM140	IFIT5	TNFSF13B	SIGLEC1
ov.tcga	IFI44L	OAS2	RSAD2	IFI44	MX1	IFIT3	OAS1	ISG15	OAS3	IFIT1	OASL	HERC6	IFIH1	IFI6	XAF1	HERC5	DDX60	LAMP3	IFI35	DDX58	SAMD9	IFIT2	PLSCR1	SP110	STAT1	TRIM22	PARP12	CXCL10	CXCL11	IFI27	UBE2L6	USP18	RTP4	IFIT5	TMEM140	SP100	MX2	EIF2AK2	TRIM21	IRF9	ISG20	SLC15A3	TAP1	PSMB9	GBP1	DHX58	HLA-B	HLA-F	TDRD7
Top genes:	IFI35:6	UBE2L6:6	SP110:6	MX1:5	IFI44L:5	IFIT1:5	IFI44:5	ISG15:5	IFIT3:5	IFI6:5	RSAD2:5	HERC6:5	OAS3:5	IFIH1:5	IFI27:5	OASL:5	DDX60:5	USP18:5	HERC5:5	STAT1:5
6	ID100	6	0.321284
brca.gse2034	AKR1C1	AKR1C2	AKR1C4	PLIN1	AOC3	CIDEC	G0S2	FABP4	RBP4	AKR1C3	ADIPOQ	ADH1B	CHRDL1	LOC339524	LEP	LPL	CAV1	CAV2	ITIH5	GPD1	VWF	FHL1	ITGA7	PALMD	CD36	CIDEA	ENPP2	PCOLCE2	ANK2	PPAP2A	ABCA8	LINC00341	SORBS1	CDH5	CLDN5	CFD	AQP1	TNS1	PPARG	IGF1	GYG2	GNG11	DARC	TGFBR2	LHFP	PECAM1	PDE2A	ELTD1	SRPX
brca.tcga	CGB1	PPP6R1	FLJ38723	C9orf47	IL1F10	VPS18	OR4S1	CABP7	C9orf71	WDR33	PPM1F	ARHGAP22	PIK3R5	RPA4	FAM216B	CGB2	SLC10A1	ARX	SPZ1	POU3F2	PCSK4	TEX12	CD86	ZCCHC13	RBM22	CCDC66	KCNJ9	NPAT	FAM193B	ALK	WDR87	GNG11	AQP2	LINC00469	COL19A1	GPR151	WASF4P	NRXN2	LRRC2	SOX17	TNXB	DLG4	GRAMD1C	S100A5	GOLGA2P2Y	PLCXD3	BHLHE23	AQP1	FAM110D
coad.gse14333	LOC100130100	IGLL3P	TNFRSF17	IGLL5	MZB1	LOC96610	IGJ	POU2AF1	LOC100133862	PIM2	SLAMF7	DERL3	ANKRD36BP2	CD27	FAM46C	CD38	CD79A	CYTIP	LAX1	KLRB1	KLHL6	SLAMF1	C16orf54	CD3D	ADAMDEC1	CD2	PTPRC	IKZF1	CD48	CXCL13	EVI2B	P2RY10	PPP1R16B	CD69	MPEG1	FGL2	DOCK2	RASSF5	CECR1	ITGAL	DNASE1L3	ITM2A	CPNE5	RASGRP1	PRDM1	CD247	LRMP	ITK	IRF4
coad.tcga	C9orf47	PPP6R1	CABP7	CGB1	FLJ38723	VPS18	IL1F10	OR4S1	PIK3R5	C9orf71	CD86	ARHGAP22	PPM1F	RBM22	PCSK4	CCDC66	MS4A6A	CTSZ	NPAT	POU3F2	AQP2	LST1	GNG11	LINC00469	CALM2	SPZ1	PFDN5	VAMP8	FAM176B	ARX	SLC10A1	RAB1B	FAM216B	EVI2A	SH3GL1	RPS3A	VAMP5	ALOX5AP	NSL1	MRPL53	GPR12	GPR34	HPGDS	LILRP2	ALK	LY96	GPR183	SDC2	S100A12
ov.gse9891	FABP4	ADH1B	ADIPOQ	CD36	PLIN1	CCDC80	AOC3	BCHE	CRISPLD2	SVEP1	PTGER3	C13orf33	SFRP2	LPL	FAP	ASPN	GREM1	CXCL12	RUNX1-IT1	THBS2	RGS4	VGLL3	INHBA	PRRX1	ISL1	HSD17B6	DOCK11	COL3A1	EPYC	G0S2	CYP1B1	POSTN	ZEB2	LUM	PRKG1	LOX	C4orf32	AQP1	ALDH1A3	ALPK2	ASPA	SERPINF1	CXCL14	CFD	SNAI2	VCAN	EVI2A	ACTA2	PDLIM3
ov.tcga	IGKC	IGHM	IGKV1-5	IGLV2-14	IGL@	MZB1	IGLV3-25	CXCL9	POU2AF1	TNFRSF17	SLAMF7	CD2	CYTIP	CD38	CD3D	EVI2B	PTPRC	CD27	CXCL13	CCL5	IL2RG	CD48	IL10RA	IGHD	LAX1	ADAMDEC1	ARHGAP15	GZMK	LYZ	CSF2RB	LCP2	GIMAP4	CD53	PLEK	SLAMF8	GIMAP5	FYB	CD79A	LY96	CCR2	RHOH	CD52	GZMA	NKG7	PTPRCAP	TFEC	CCR5	SAMSN1	C1QA
Top genes:	AQP1:3	GNG11:3	PLIN1:2	AOC3:2	G0S2:2	FABP4:2	ADIPOQ:2	ADH1B:2	LPL:2	CD36:2	CFD:2	CGB1:2	PPP6R1:2	FLJ38723:2	C9orf47:2	IL1F10:2	VPS18:2	OR4S1:2	CABP7:2	C9orf71:2
7	ID40	6	0.146865
brca.gse2034	FABP4	ADIPOQ	ADH1B	G0S2	PLIN1	AOC3	RBP4	CHRDL1	CD36	LPL	CIDEC	LOC339524	SORBS1	ABCA8	CAV1	FHL1	CFD	LEP	GPD1	ITIH5	SEMA3G	AKR1C1	LHFP	GNG11	VWF	THBS4	AKR1C2	DARC	ACACB	CIDEA	PCOLCE2	DPT	ZCCHC24	SRPX	PPARG	PPAP2A	PCK1	CDH5	IGF1	TNS1	ANK2	LINC00341	ITGA7	PALMD	LDB2	TIMP4	MMRN2	AKAP12	TGFBR2
brca.tcga	ADIPOQ	CIDEA	ADH1B	PLIN1	MRAP	ADH1C	GPD1	PLIN4	FABP4	C6	AQP7P2	LEP	G0S2	TNMD	ADH1A	LGALS12	CIDEC	ITIH5	C7	LIPE	CD36	NNAT	AQP7	DARC	AOC3	PCOLCE2	GLYAT	RBP4	GPX3	ABCA8	PI16	PCK1	ACVR1C	RDH5	FHL1	IGF1	SLC19A3	KCNIP2	TIMP4	TPO	MEOX1	TMEM37	LPL	FIGF	CA4	GDF10	PDK4	SCARA5	HSPB7
coad.gse14333	LEP	CIDEA	THRSP	AQPEP	CYP4B1	SLC7A10	PLIN1	GPR146	CD300LG	KLB	KCNIP2	GPIHBP1	CIDEC	PLIN4	GPD1	MRAP	LGALS12	C6	C18orf34	ACACB	PPP1R1A	KCNB1	SOX17	LBP	ACADL	CLDN5	SVEP1	NPR1	PRG4	LOC339524	AFAP1L1	HEPACAM	SLC26A7	ZBTB16	KIAA1239	RBP7	GPAM	SPATA9	LOC100506974	GJA4	COLEC11	PTGER3	TUSC5	DPY19L2	DMRT3	ARHGEF15	RAPGEF3	C1QTNF9	CXorf36
coad.tcga	GSTA2	GSTA3	GSTA5	C11orf92	GBA3	MB	B3GNT6	CAPN6	REP15	CRYM	ATP13A4	NR1H4	AKR1B10	PROM2	BMX	HGD	SCARA5	SLC16A4	ITLN2	SPIN3	SPINK2	CASD1	BEST2	ZNF223	SH2D6	PLCL2	FAM5C	SOSTDC1	PCSK1	METTL7A	RDH5	UGT1A8	C16orf89	C5orf4	NLGN4Y	CDHR2	SLC18A1	FGF13	CADPS	RAB27B	AMPD1	GFI1	ALDH1L1	C6	ADTRP	DAPL1	RDH12	CCL5	COLEC11
ov.gse9891	AKR1C1	AKR1C2	AKR1C4	AKR1C3	PLIN4	PLIN1	MAOA	ADIPOQ	HSD17B2	GNG11	FOXN3	CLDN11	PPAP2A	AOC3	ASPA	GCOM1	CD36	FABP4	FMO2	SMURF2	CEACAM5	PPARG	ACSM1	EIF5A2	PDK4	ATP2C2	FAM102B	PIP4K2A	LMTK2	FOXA1	ANKRD29	PCOLCE2	TIMP4	G0S2	SFRP1	TCEAL4	MIR143HG	CIDEC	HEY1	RBP7	GNE	LIMA1	KIAA1239	FEZ1	S100P	BMP2	ABCA8	ADH1C	GSTM3
ov.tcga	CRH	CLCA2	CYP2C9	SPRR3	ADH7	MSMB	IVL	KCNJ15	HSD17B2	DPEP2	GPX2	ELF5	DUOX2	KRT20	CYP4F12	RAB27B	UPK2	CLCA4	LY6D	CYP2C18	PLA2R1	GNA14	UPK3A	CCL17	CACNB4	KEL	EPS8L3	SPRR1A	ADH1C	BHMT	FMO5	TRPV6	SCNN1B	TRIM31	GATA3	TMEM40	KRT13	TMC7	BCAS1	CIDEA	MYBPC1	CEACAM7	TNNI2	RAPGEFL1	PRODH	CXorf57	HAMP	KIAA0513	ABLIM3
Top genes:	PLIN1:4	CIDEC:4	CIDEA:4	FABP4:3	ADIPOQ:3	G0S2:3	AOC3:3	CD36:3	ABCA8:3	LEP:3	GPD1:3	PCOLCE2:3	TIMP4:3	ADH1C:3	PLIN4:3	C6:3	ADH1B:2	RBP4:2	LPL:2	LOC339524:2
8	ID45	5	0.401218
brca.gse2034	PUF60	EXOSC4	CYC1	GPR172A	BOP1	HSF1	SCRIB	SLC39A4	GPAA1	FBXL6	PYCRL	C8orf55	C8orf33	RPL8	CPSF1	ZNF706	RAD54B	MTDH	PTDSS1	ZNF7	MTERFD1	GRINA	RRS1	RECQL4	MTFR1	MRPL15	VPS28	ZNF696	OPLAH	DSCC1	ESRP1	DERL1	ATAD2	ZC3H3	TCEB1	MCM4	UBE2C	ARMC1	RAD21	SHARPIN	SLC25A32	MRPL13	ATP6V1C1	POLR2K	PTK2	TMEM70	AZIN1	CCNB1	SQLE
brca.tcga	EXOSC4	PUF60	SLC52A2	FAM203A	BOP1	COMMD5	HSF1	PYCRL	SCRIB	TIGD5	C8orf33	ADCK5	FBXL6	SHARPIN	RECQL4	ZNF696	CYC1	FAM83H	ZNF707	RPL8	THEM6	EIF2C2	RHPN1-AS1	LRRC14	PTK2	PPP1R16A	KIFC2	ZNF7	TONSL	ARHGAP39	TRAPPC9	DGAT1	MFSD3	HEATR7A	VPS28	ZNF250	NDUFB9	DCAF13	C8orf76	SLC39A4	DERL1	ENY2	MRPL13	CPSF1	TOP1MT	MAF1	PTDSS1	MTERFD1	TCEB1
coad.gse14333	null
coad.tcga	NUDCD1	MED30	MTERFD1	NDUFAF6	TMEM70	POLR2K	TCEB1	C8orf76	CPNE3	MRPL13	COPS5	RNF139	SLC25A32	DCAF13	RPL30	COMMD5	EMC2	EXOSC4	ZFAND1	YWHAZ	ENY2	MTFR1	TATDN1	MRPL15	PLEKHF2	EBAG9	EIF3E	CHCHD7	ARMC1	FAM82B	E2F5	FAM49B	PEX2	DPY19L4	AZIN1	PUF60	TMEM68	LYPLA1	UBE2V2	RAB2A	ANKRD46	NDUFB9	C8orf33	HRSP12	WDR67	UTP23	DSCC1	RAD21	TRAM1
ov.gse9891	MAF1	ZC3H3	SHARPIN	CYHR1	EXOSC4	SLC52A2	CPSF1	CYC1	TSTA3	PUF60	FBXL6	BOP1	HSF1	PPP1R16A	GPAA1	PYCRL	COMMD5	ZNF7	MFSD3	SCRIB	ADCK5	GRINA	FAM83H	C8orf82	DGAT1	RPL8	ZNF16	OPLAH	TIGD5	C8orf33	RECQL4	PTK2	ZNF34	KIFC2	GSDMD	SLC39A4	VPS28	CHRAC1	TRAPPC9	THEM6	TONSL	PARP10	ZNF250	ARHGAP39	ZNF252P	EEF1D	ZNF251	LOC100507316	ZNF707
ov.tcga	EXOSC4	CYC1	PUF60	VPS28	PYCRL	ZNF7	GPAA1	HSF1	ZNF16	TSTA3	GRINA	SHARPIN	BOP1	RPL8	FAM203A	GSDMD	C8orf33	DGAT1	DERL1	THEM6	ZC3H3	PTK2	ZNF34	SLC52A2	TRMT12	EEF1D	MRPL13	ZNF623	KIAA0196	RNF139	ZNF250	CPSF1	FBXL6	WDYHV1	EBAG9	TRAPPC9	RHPN1-AS1	LY6E	FAM49B	EIF3H	ENY2	SLC39A4	SQLE	ATP6V1C1	OPLAH	COX6C	RPL30	EFR3A	HRSP12
Top genes:	PUF60:5	EXOSC4:5	C8orf33:5	CYC1:4	BOP1:4	HSF1:4	SLC39A4:4	FBXL6:4	PYCRL:4	RPL8:4	CPSF1:4	ZNF7:4	VPS28:4	SHARPIN:4	MRPL13:4	PTK2:4	SCRIB:3	GPAA1:3	MTERFD1:3	GRINA:3
9	ID5	5	0.372458
brca.gse2034	null
brca.tcga	FOXN4	TEKT1	ZBBX	CDC20B	TMEM190	CXorf41	ROPN1L	CCDC164	YSK4	CATSPERD	AKAP14	WDR16	RSPH4A	MORN5	C20orf85	SNTN	TTC29	FOXJ1	ENKUR	C6orf118	CCDC135	LRRC71	DNAI2	AK7	GAS2L2	WDR63	CAPSL	LRP2BP	CCDC19	WDR49	C11orf88	TEKT2	SPAG8	IQUB	C6orf165	CCNO	FAM81B	C1orf192	ARMC4	FAM154B	EFCAB1	KCNE1	C22orf15	EFHB	PCDP1	C11orf16	C21orf128	WDR38	SPATS1
coad.gse14333	DSPP	TAC4	LRRC16B	AGER	MAG	LRTM2	SPAG8	HAMP	LOC340107	KLF17	GPR26	LOC100506553	LOC729732	OR10H1	C21orf90	GBX2	LOC100505659	LOC100507146	LILRA4	PLEKHN1	F7	TBX1	KCNF1	MGC50722	PHF7	HSPB9	LINC00202	GALNT9	EVPLL	C12orf54	FBLL1	UCN2	C5orf55	ANKRD30B	IGFN1	CCDC37	CDR1	LOC100506368	LOC284379	TRPV4	LOC100507630	CACNG8	DIRAS1	C17orf51	SCT	POLL	FAM83C	MORN1	FAM71A
coad.tcga	FAM81B	WDR49	CAPSL	C6orf165	DNAJB7	CASC1	WDR69	CATSPERD	PRSS38	GAS2L2	SNCG	ZMYND10	CXorf41	ANXA8L2	WDR38	RSPH4A	C4orf26	SPAG8	CCDC135	C2orf73	GPR87	LPPR5	IQUB	ROPN1L	LHB	CCDC19	YSK4	SPEF1	VWA3A	TMEM190	SERPINI2	BTBD10	TSNARE1	DCDC5	LRRC46	UPK3B	KLK5	TSNAXIP1	XIRP2	TMIE	LRP2BP	TAGLN3	MORN2	FBXL13	C15orf43	DNAJC24	ENKUR	C1orf192	KRT5
ov.gse9891	TEKT1	WDR16	ROPN1L	ARMC3	CCDC19	RSPH1	DNAI1	ENKUR	YSK4	SNTN	FAM216B	LRRC46	C1orf194	ZMYND10	TTC25	CAPSL	WDR96	HYDIN	DNAH12	MORN5	C1orf88	DNAAF1	C20orf85	CCDC114	DNAH7	WDR63	TPPP3	ZBBX	FAM81B	EFCAB1	CCDC39	WDR38	TTC29	AKAP14	LOC643037	C1orf192	ARMC4	TUBA4B	C9orf24	CCDC96	SPEF1	C6orf118	C7orf57	SPATA18	CCDC113	TEKT2	KIAA1377	C2orf77	CDHR3
ov.tcga	ZMYND10	EFCAB1	CCDC19	ZBBX	TEKT2	DNAAF1	C14orf45	C9orf116	FOXJ1	DNAI1	DNAH7	CASC1	SPEF1	TSNAXIP1	C11orf16	CCNO	LRP2BP	TPPP3	MAK	LRRC23	LRRC48	CCDC81	ZC2HC1C	LRRC6	NME5	DLEC1	WDR78	EFHC2	MNS1	RAB36	RIBC2	ANKMY1	EFHC1	RPGR	SPAG8	NEK11	PPOX	PACRG	TMEM231	TCTN1	SPAG6	TTC26	C11orf63	SPA17	CETN2	WDR96	C7orf63	RTDR1	DNAI2
Top genes:	CCDC19:4	SPAG8:4	ZBBX:3	ROPN1L:3	YSK4:3	ENKUR:3	CAPSL:3	LRP2BP:3	TEKT2:3	FAM81B:3	C1orf192:3	EFCAB1:3	WDR38:3	ZMYND10:3	SPEF1:3	TEKT1:2	TMEM190:2	CXorf41:2	CATSPERD:2	AKAP14:2
10	ID60	5	0.260088
brca.gse2034	TCEB1	MRPL13	POLR2K	TMEM70	MTDH	COPS5	MTERFD1	AZIN1	TTC35	ZNF706	SLC25A32	UBE2V2	MRPL15	ARMC1	FAM82B	ENY2	TAF2	HRSP12	ATP6V1C1	EBAG9	TERF1	WDYHV1	MRPS28	KIAA0196	MTFR1	INTS8	STK3	UQCRB	DERL1	UBR5	ZNF7	RRS1	ZFAND1	RB1CC1	RAD21	RAD54B	TRMT12	EFR3A	DPY19L4	RPL30	PUF60	RNF139	TGS1	DSCC1	ATP6V1H	PEX2	PTDSS1	TCEA1	IMPA1
brca.tcga	PRSS36	IL27	KRTAP5-8	MAB21L2	DIRC1	MLLT4-AS1	SAMD10	FAM160B2	CRCT1	NCKAP1	HOXD3	GFAP	MCAT	GPT	RPL14	LCE1C	LCE2A	PDCD4	RPS14	RPS9	RPL26	RPS6	RPL7A	NSMCE1	DICER1	RPL9	RPS15	GLTSCR2	RPL13A	KRTAP1-3	GPHB5	OMP	MOS	C9orf163	FOLR1	TAAR1	AVPR1A	BTF3	TPT1	RPS27	C17orf76-AS1	RPS24	RPS11	BEST4	GPATCH4	SELT	C1QTNF7	RPL3	TAS2R46
coad.gse14333	RPS9	EEF1B2	RPS5	RPL10A	RPS16	RPLP0	RPL29	RPS10	RPS28	RPS7	RPS18	RPS15	RPS3	RPL35A	RPL32	RPL24	RPL18A	EEF1G	RPL15	UBA52	RPS3A	RPS15A	RPL27	RPL3	RPS2	RPL36	RPS11	RPS12	FAU	RPS13	SNRPD2	RPL18	RPL30	RPL35	RPL14	RPLP2	RPS24	RPL26	RPS6	RPL37	RPL19	RPL13	RPLP1	RPS14	RPL34	RPS8	RPL11	RPL22	RPL7
coad.tcga	RPSA	RPSAP15	RPL14	NPRL2	RPL15	GPHB5	RPL29	RPL32	SLC25A38	OXSM	P4HTM	CRBN	RPS8	IFRD2	EEF1B2	RPL24	OMP	RRP9	RPS3A	EIF1B	HACL1	DALRD3	RPL18A	RPS6	POLR1C	MRPL11	THOC7	BEST4	C9orf163	CHCHD6	MYNN	TUSC2	NKX6-1	OR10J5	ZAN	RPS14	TEX264	CCDC72	RPS18	KCTD6	RPS5	OR10A7	PNPLA5	RPL21	ZNF461	STOML2	GPR37L1	RPUSD3	C3orf23
ov.gse9891	EMC2	MTDH	EBAG9	UBR5	ATP6V1C1	SLC25A32	AZIN1	NUDCD1	UTP23	PLEKHF2	OXR1	FAM82B	STK3	LOC100506365	RNF19A	WWP1	MTERFD1	KIAA0196	ZNF706	EIF3H	TAF2	COX6C	EXT1	DCAF13	RNF139	DERL1	ENY2	POLR2K	UQCRB	VPS28	LAPTM4B	RPL30	INTS8	MAL2	FAM91A1	EIF3E	RAD21	NSMCE2	YWHAZ	TATDN1	OSGIN2	ZHX1	MRPL13	PTK2	COMMD5	NBN	HRSP12	PEX2	WDYHV1
ov.tcga	null
Top genes:	RPL30:3	RPL14:3	RPS14:3	RPS6:3	MRPL13:2	POLR2K:2	MTDH:2	MTERFD1:2	AZIN1:2	ZNF706:2	SLC25A32:2	FAM82B:2	ENY2:2	TAF2:2	HRSP12:2	ATP6V1C1:2	EBAG9:2	WDYHV1:2	KIAA0196:2	INTS8:2
11	ID72	5	0.204374
brca.gse2034	null
brca.tcga	CEACAM6	CEACAM3	CEACAM8	CEACAM7	CEACAM5	BCAS1	SPDEF	TSPAN1	MLPH	FOXA1	CAPN9	TFF3	PRR15	SLC44A4	SLC2A10	LRRC31	GPR160	GNA14	AGR2	TOX3	GPRC5C	PSG6	FAM83E	XBP1	AR	CREB3L1	SIDT1	SCNN1A	TMBIM6	ZNF552	BPIFB1	ECM1	MUC1	LRFN2	LFNG	RALGPS2	INPP4B	CREB3L4	ATP2C2	PTPRN2	SLC7A8	S100P	CAPN13	ERGIC1	GDF15	CXCL17	SCGB2A2	GALNT7	PLA2G10
coad.gse14333	MS4A12	CLCA4	CA1	CA4	ZG16	GUCA2A	CEACAM7	CA2	SLC26A3	LOC646627	CLDN8	DHRS9	SLC4A4	GCG	B3GNT7	SI	CDHR5	BTNL3	VSIG2	AQP8	SCNN1B	SLC26A2	ADH1C	SPINK5	OSTBETA	PLA2G10	EDN3	FAM55D	CLDN23	PKIB	LRRC19	ITM2C	ADTRP	CHP2	HSD17B2	PLAC8	HHLA2	AKR1B10	C2orf88	PADI2	PBLD	PLCE1	SEPP1	SULT1B1	MUC12	PDE9A	CD177	GUCA2B	CDKN2B
coad.tcga	GUCA2B	CLCA4	MS4A12	CA4	CA1	TMIGD1	GUCA2A	AQP8	CHGA	ZG16	GCG	SI	ITLN2	CD177	ADH1C	DHRS9	PYY	CLDN8	VSIG2	ADTRP	CLCA1	MADCAM1	CA2	AMPD1	SCNN1B	CEACAM7	BEST2	SLC4A4	PLAC8	FAM5C	DNASE1L3	INSL5	DUOX2	FAM55D	SCARA5	SEPP1	C2orf88	SST	ADH1B	GBA3	CWH43	EDN3	B3GNT6	CHP2	MUC4	RSPH9	NPY1R	SPINK4	KCNJ16
ov.gse9891	CLCA1	ZG16	VIP	RETNLB	GCG	MUC2	SPINK4	PRAC	HEPACAM2	FAM55D	NKX2-3	NOX1	MUC12	CA1	ISX	MAB21L2	SLC26A3	SI	FABP1	REG4	DES	MUC13	GUCY2C	MYOT	LOC646627	FAM55A	GPA33	CEACAM7	INSL5	MEP1A	MS4A12	PNLIPRP2	ADH1C	CDH17	LGALS4	LRRC19	CLRN3	PCDH20	KRT20	BEST2	MYH11	CHRNA3	CD177	CHRDL2	A1CF	EPS8L3	NBLA00301	CDHR5	LINC00483
ov.tcga	CLCA1	REG1B	ALDOB	FABP1	DEFA5	SPINK4	REG3A	SI	DEFA6	LGALS4	SLC26A3	GCG	CDH17	MEP1A	TM4SF20	GPA33	SLC10A2	ZG16	KRT20	APOC3	LRRC19	GUCA2A	KCNV1	MTTP	MS4A12	DUOX2	MEP1B	GPX2	MUC13	BAI1	APOBEC1	CEACAM5	SMR3B	UGT2A3	P2RY1	CLCA4	BLK	NGFR	MYO1A	BHMT	APOB	SPINK1	KCNK12	CDHR2	KL	PDE5A	CEACAM7	APOA4	DES
Top genes:	CEACAM7:5	MS4A12:4	ZG16:4	GCG:4	SI:4	CLCA4:3	CA1:3	GUCA2A:3	SLC26A3:3	CDHR5:3	ADH1C:3	FAM55D:3	LRRC19:3	CD177:3	CLCA1:3	SPINK4:3	CEACAM5:2	PLA2G10:2	CA4:2	CA2:2
12	ID27	5	0.171397
brca.gse2034	GABRP	SFRP1	SOX10	ROPN1B	ELF5	SYNM	PROM1	MMP7	KRT6B	FAM171A1	TRIM2	TCF7L1	KRT5	MIA	KRT14	CDH3	CX3CL1	TRIM29	SERPINB5	BBOX1	EN1	FOXC1	BCL11A	KRT17	CRYAB	VGLL1	SLC6A14	MFGE8	PADI2	NFIB	CHI3L1	KCNN4	KRT23	KCNK5	ID4	KIT	FZD7	RARRES1	MID1	ACTR3B	KRT15	TM4SF1	GPM6B	DSC2	FABP7	TBX19	SLC43A3	TMEM158	FXYD6
brca.tcga	ROPN1	ROPN1B	MIA	GABRP	SFRP1	FOXC1	SOX10	BCL11A	VGLL1	PPP1R14C	SRSF12	LEMD1	UGT8	FOXL1	TRIM29	RGMA	KLK8	KLK6	FAM171A1	TTYH1	BBOX1	KRT6B	KRT16P3	KRT16	B3GNT5	FABP7	KRT5	SLC6A14	SOSTDC1	SHC4	KRT6C	ELF5	KRT6A	SERPINB5	KLK5	KRT17	FERMT1	SCRG1	HORMAD1	TRIM2	GPM6B	PROM1	STOX2	KLK7	STAC	IL34	S100B	STAC2	ART3
coad.gse14333	VSIG1	RXFP1	GPR87	FSIP2	ANKRD1	ANK1	EPHB6	ELFN2	RAB3B	FAM171B	VGLL1	ZSCAN4	NF2	IGSF5	TTYH1	LOC100507525	ITGA10	SEPT3	RBMS2	KIAA0040	DOCK9	C6orf147	LOC100506377	WNT7B	HIVEP3	IL37	B3GALT2	ITGB8	FOXL1	LETM2	COL13A1	C21orf88	DNAAF3	C16orf52	C14orf105	C9orf169	CDCP1	SLC12A6	SMURF1	UBASH3B	HRASLS5	SMAD3	COMMD3	NIPAL4	CSF2	PARD6B	DLG5	CALB2	IGFBP1
coad.tcga	HOXB6	HOXB5	HOXB3	HOXB8	HOXB7	HOXB9	HOXB4	PAPSS2	SKAP1	CMTM6	GOLGA5	TMEM30A	SREBF1	SPRED1	SIDT1	NXF3	ALDH6A1	TNIK	POLR2A	C14orf159	DDB2	C3orf52	ARSJ	MAP3K5	NUP210	OXCT1	PTPN13	RHOT2	OSR2	ANTXR2	CKAP4	ZSWIM6	SPRY1	B3GNT4	LEPROT	P2RY1	ZNF630	SBSPON	CTDNEP1	TXNDC9	IBA57	DOK7	PERP	SLC22A23	SLC22A15	EXPH5	RTN4	YIPF5	CCNG2
ov.gse9891	LINC00326	SGCZ	IDO2	UGT1A6	GAD2	ACTN2	C2orf80	RIMS1	UGT3A1	LBX1	LAMB4	CGA	GRIA4	SFTA3	PAPPA2	NKX2-1	LOC100130894	CBLN1	IGSF5	PCDHAC2	SCTR	SHC4	SHISA3	KCNJ15	GDNF	BEND4	GAS2	KCNJ3	SCIN	LOC100505967	BRDT	HOXA6	HOXD11	HOXA11-AS	HOXB9	FLJ41350	HEATR7B1	TP63	TFAP2B	KHDRBS2	DNM3	LCMT1	LRRC7	VAT1L	FAM181B	APCDD1L	PCDHAC1	MYO15A	MARK1
ov.tcga	null
Top genes:	VGLL1:3	GABRP:2	SFRP1:2	SOX10:2	ROPN1B:2	ELF5:2	SYNM:2	PROM1:2	KRT6B:2	FAM171A1:2	TRIM2:2	KRT5:2	MIA:2	TRIM29:2	SERPINB5:2	BBOX1:2	FOXC1:2	BCL11A:2	KRT17:2	SLC6A14:2
13	ID118	5	0.167304
brca.gse2034	IFITM2	IFITM3	IFITM1	IFI35	IRF7	IFIT3	OAS3	OAS2	LGALS3BP	OAS1	TRIM22	UBE2L6	TPP1	PSMB8	PLSCR1	B2M	SP110	RHOG	MYD88	SAMD9	TRIM21	IFI44L	BST2	IRF9	TRANK1	ALOX5AP	RSAD2	RNH1	TSPAN4	HLA-B	SERPING1	C19orf66	SERPINF1	DDX60	CD74	MX1	CTSO	OASL	IFI44	SIGIRR	HLA-G	HLA-F	HLA-E	IFIT1	HLA-DRA	ILK	ISG15	STAT6	IFI6
brca.tcga	AKR7A3	AKR7L	AKR7A2	P4HTM	MLPH	FOXA1	GATA3	ACOT4	TBC1D9	SPDEF	XBP1	C4orf34	TTC39A	HMGCL	KRT18	KRT18P55	DALRD3	HDAC11	STARD10	FBP1	ZMYND10	ACADSB	GPR160	THSD4	EVL	WWP1	ESR1	CXXC5	PRR15	AGR2	ZNF552	KCNJ11	IVD	HCAR1	TFF3	BBS4	SIDT1	NPRL2	DYNLRB2	RAB17	MAGED2	CA12	INPP4B	SLC44A4	PLEKHF2	CCDC170	CMBL	ATP5G2	INPP5J
coad.gse14333	HLA-F	HLA-G	HLA-B	HLA-E	HLA-C	HCP5	BTN3A3	PSMB9	TAP1	BTN3A1	PSMB8	TAP2	NLRC5	UBE2L6	LOC100507463	GBP1	STAT1	IRF1	SAMD9L	PARP14	PARP9	BTN3A2	HLA-DMA	GBP4	APOL6	WARS	UBD	IRF9	IDO1	CD74	RARRES3	HLA-DRA	HLA-DRB6	LAP3	PSME1	PSMB10	CXCL10	IFIH1	PSME2	TRIM22	SLC15A3	BTN2A2	ETV7	IFIT3	SP110	ADAR	BTN2A1	DTX3L	B2M
coad.tcga	AKR7A3	AKR7L	AKR7A2	CDC42	THAP3	GPN2	HIST1H3F	ETHE1	NBL1	CYSTM1	SNX22	TSPO	RTBDN	HCRTR1	CNIH	FAM54B	SYNGR4	SH3BGRL3	MFSD2A	MPDU1	SFN	NRGN	C18orf32	C14orf129	CCDC103	SDHB	PLLP	TREX1	GCNT3	ATPIF1	HAGHL	STX12	SGMS2	SERPINB8	PNP	AGR3	FAM47C	NUDT8	PRG3	AGR2	MED11	CALM2	NDUFB10	OR2B2	C17orf61	GRAMD1B	CDK5R2	CRIP1	MGST3
ov.gse9891	MT1G	MT1H	MT2A	MT1X	MT1F	MT1E	ICAM1	PSMB9	RARRES3	B2M	STEAP1	EPSTI1	TAP1	IFI27	HLA-B	TYMP	GBP1	PIEZO1	CD300A	UBE2L6	C10orf54	IRF1	HLA-F	NINJ2	CXCL10	C15orf48	TAP2	CORO1A	LAPTM5	CAP1	FCER1G	NNMT	PARP9	HAVCR2	STAB1	HCG26	C2	HCK	AQP9	HLA-G	ODF3B	CASP1	FERMT3	C1R	FOSL2	OAS1	CMPK1	ITGB2	FBXO32
ov.tcga	null
Top genes:	UBE2L6:3	B2M:3	HLA-B:3	HLA-G:3	HLA-F:3	IFIT3:2	OAS1:2	TRIM22:2	PSMB8:2	SP110:2	IRF9:2	DDX60:2	CD74:2	HLA-E:2	HLA-DRA:2	IFI27:2	AKR7A3:2	AKR7L:2	AKR7A2:2	AGR2:2
14	ID11	5	0.14529
brca.gse2034	null
brca.tcga	RPS4Y1	RPS4Y2	DDX3Y	EIF1AY	UTY	TXLNG2P	KDM5D	TTTY14	USP9Y	NLGN4Y	PASD1	TYR	ZFY	ITIH2	PRODH2	GAP43	TMPRSS11A	TM4SF5	HOXD11	FOXE1	DCT	AHSG	DUOXA2	POU5F1	HEMGN	EYA4	TSPY2	C10orf99	APOA2	SMCP	HBE1	IGFBP1	APOA1	APOC3	ASGR2	SPRR2F	IGF2BP1	GATA1	ALAS2	MYL4	SPRR1A	PRAMEF8	LIPC	APOH	C10orf62	SSTR3	POU5F1P4	SPRR2D	CPS1
coad.gse14333	EIF1AY	DDX3Y	RPS4Y1	ZFY	KDM5D	USP9Y	UTY	TTTY15	PRKY	NCRNA00185	TMSB4Y	NLGN4Y	CD99	ZFY-AS1	AKAP17A	DHRSX	SLC25A6	ZBED1	SPESP1	ABCD3	ACADSB	ASMTL	PKIG	RNF14	GTPBP6	CD99P1	UGT2A3	KLHL13	RHOBTB1	UBE2G1	LOC100505738	MYEF2	LOC100289097	ZNF75A	PPP2R3B	TPK1	PURA	PPP2R1B	PLCXD1	CHFR	RTN4	PAPD4	CRYZL1	GRB14	PCDH20	SIK3	LOC100240735	EPHX2	ADH1B
coad.tcga	RPS4Y2	DDX3Y	EIF1AY	RPS4Y1	UTY	TXLNG2P	KDM5D	ZFY	USP9Y	NLGN4Y	TTTY14	TTTY13	DAZ4	AMELY	TMSB4Y	LYN	CTCFL	SEL1L	FAM134B	SSX2	VAV3	EGF	DDX43	NANOS3	FGFBP1	RAB32	NUP210L	DAPL1	ZNF780B	SPINK5	FUZ	MLANA	CLCA1	PRSS33	PIWIL2	DNTT	PMF1	MAG	OR2A25	PRKY	OOEP	GPR143	RELL2	ZMAT4	VWA5A	TDRD3	PADI2	ENHO	NBL1
ov.gse9891	IL34	PTCRA	NYX	C1orf170	SPTBN4	CELF3	DUOXA2	HMX1	MYOG	NPPA	IGFALS	PITX3	TCF15	LOC389458	CHRNB2	LINC00475	OSGIN1	DUX1	ASPDH	PI16	SPACA4	MAPK8IP2	FAM57B	SFTPC	TMEM59L	MYL10	GLP1R	SUV420H2	LOC100287437	PDCD1	GRIN1	TSSK6	C11orf86	SH3BP1	C14orf166B	FKBP6	ZBTB7B	TTTY14	EPO	GNAT1	PVRL1	BBC3	CEMP1	MDGA1	PSD	IL13	MORN1	KLK9	JSRP1
ov.tcga	TMPRSS15	CSF3	IL36RN	IL11	BDKRB1	PAPPA	PTPRN	HAS1	ZNF804A	MYOZ2	RAB3B	FGF2	EREG	CNGA3	SERPIND1	ZNF385D	ADORA2A	IL24	HGF	EBF2	CHRNA9	APOH	BLK	ULBP2	DAZL	KRT33B	KRT34	TAGLN3	DGKI	ARHGAP22	FGF7	RAB27B	FOSL1	ETV1	MMP3	CNIH3	ABCC2	PAQR5	TNFRSF10D	DDX3Y	TNFSF9	ASB1	SHC3	SHOX2	PPP4R4	ZNF365	CRHBP	LAT	EIF1AY
Top genes:	DDX3Y:4	EIF1AY:4	RPS4Y1:3	UTY:3	KDM5D:3	TTTY14:3	USP9Y:3	NLGN4Y:3	ZFY:3	RPS4Y2:2	TXLNG2P:2	DUOXA2:2	APOH:2	PRKY:2	TMSB4Y:2	PASD1:1	TYR:1	ITIH2:1	PRODH2:1	GAP43:1
15	ID1	4	0.605201
brca.gse2034	null
brca.tcga	HES7	TSPAN10	UTS2R	CASKIN1	MYOD1	FBXL17	GPR150	LOC439951	SOX18	GRIN2D	GP1BB	SPPL2B	GALR3	BHLHE23	C9orf62	TPTEP1	COX6A2	CDH24	LCE5A	POU3F3	PHOX2A	GPR153	MAP3K10	CAMK2N2	LCE1D	IFITM5	ZNF579	SOX3	HCN2	EN2	ZSCAN10	PIP5K1C	DUSP15	C2CD4B	NEUROG3	GLI4	HCN4	C1orf229	SCRT2	FBRSL1	CDC42EP5	EVX1	SF3A2	ZFPM1	ZNF784	GLTSCR1	OTUD7A	KLF16	NPBWR1
coad.gse14333	LINC00520	LOC100505478	LRRC25	ASB12	SNORA71B	TDRG1	LOC100129129	CC2D2B	LOC100289509	KRTAP4-12	VWA3A	LOC147646	LCE1E	LOC100192378	LINC00599	TMEM31	ALOXE3	KNCN	PAK3	C10orf25	LOC100506473	HRG	LOC284688	GPR52	C20orf203	CPN2	TCTE3	IL36RN	SLC8A2	LOC257358	NCCRP1	FAM124B	C10orf68	FAM71D	ADAM5P	CNTNAP5	SLC26A8	KRTAP4-4	PRKG2	LOC100130155	MC5R	LOC339666	ACRV1	OR7A5	LOC100506419	C1orf105	TSGA13	DBIL5P2	PGLYRP4
coad.tcga	UTS2R	HES7	GP1BB	GPR153	FBXL17	LOC439951	GRIN2D	TSPAN10	GPR150	CASKIN1	CDH24	PHOX2A	MYOD1	GALR3	COX6A2	SOX18	C9orf62	CAMK2N2	POU3F3	TPTEP1	NEUROG3	NPBWR1	CDC42EP5	SOX3	LCE5A	MAFA	HCN2	OTUD7A	EVX1	PARP10	IFITM5	MGC34800	ZFPM1	BHLHE23	GLI4	C1orf229	DUSP15	HCN4	MGC45922	SCRT2	PITX3	C2CD4B	GRIN1	GPR156	LOC389199	FOXB1	SF3A2	ZSCAN10	CACNA1E
ov.gse9891	NCR2	EXOC3L2	MGC45922	LOC100507584	SLC22A8	HTR4	LOC147646	HPX	C15orf55	C1orf200	HRH3	POM121L12	TTBK1	CACNG5	EPHA8	TEX34	GRIN1	BPIFA3	NEUROD6	SOX10	NPM2	PSAPL1	SLC4A1	DEFB118	LINC00599	SLC34A3	HCG22	C19orf26	CAV3	PLAC4	SPRR4	SLC8A3	CABP4	LOC100505711	GRPR	SLC6A17	TMEM95	LCN6	C9orf131	TAL2	NXPH3	LOC388387	CTRC	MPV17L	C16orf78	ASMTL-AS1	CCDC116	C2orf16	ASB10
ov.tcga	null
Top genes:	HES7:2	TSPAN10:2	UTS2R:2	CASKIN1:2	MYOD1:2	FBXL17:2	GPR150:2	LOC439951:2	SOX18:2	GRIN2D:2	GP1BB:2	GALR3:2	BHLHE23:2	C9orf62:2	TPTEP1:2	COX6A2:2	CDH24:2	LCE5A:2	POU3F3:2	PHOX2A:2
16	ID44	4	0.455676
brca.gse2034	null
brca.tcga	BAG4	WHSC1L1	ASH2L	DDHD2	LSM1	PPAPDC1B	BRF2	PROSC	TM2D2	ERLIN2	RAB11FIP1	GOLGA7	FGFR1	LETM2	KAT6A	EIF4EBP1	C8orf40	ADAM9	AP3M2	ZNF703	BDNF	AGPAT6	VDAC3	FNTA	ANK1	OR52N4	RNF170	POLB	MAK16	THAP1	FUT10	C12orf60	IKBKB	HGSNAT	TACC1	NAGS	CCDC25	GINS4	CNOT7	SOGA2	NELL1	ULK2	AMN1	PLEKHA2	WRN	SNX24	GTF2E2	KIAA1107	B3GALNT1
coad.gse14333	INTS10	CNOT7	GTF2E2	CHMP7	VPS37A	PBK	ERI1	TNFRSF10A	PPP2R2A	XPO7	TTI2	AGPAT5	KCTD9	ELP3	CDCA2	MAK16	CCDC25	GSR	BIN3	TMEM66	UBXN8	INTS9	REEP4	DCTN6	LEPROTL1	R3HCC1	ESCO2	KIAA1967	FDFT1	FUT10	MCPH1	TNFRSF10B	FBXO25	NEIL2	ENTPD4	SLC25A37	MTUS1	PCM1	ASAH1	NAT1	WRN	MRPL44	FBXO16	TXNL1	MFHAS1	ZNF395	SLC39A14	MDM2	IBTK
coad.tcga	TNFRSF10A	INTS10	CHMP7	VPS37A	TNFRSF10B	CNOT7	ATP6V1B2	POLR3D	MCPH1	PPP2R2A	ERI1	ELP3	INTS9	SH2D4A	GTF2E2	KIAA1967	PCM1	TNKS	CDCA2	PBK	ENTPD4	BIN3	ESCO2	PINX1	CCDC25	UBXN8	ASAH1	REEP4	LEPROTL1	WRN	LONRF1	XPO7	MAK16	FBXO25	NEIL2	FUT10	AGPAT5	GSR	PPP2CB	TNFRSF10D	FDFT1	DCTN6	KCTD9	TMEM66	PPP3CC	NUDT18	TTI2	SLC39A14	MTUS1
ov.gse9891	ARX	PEG3	COLEC11	STAR	FOXL2	TSPAN8	KLHDC8A	TCF21	DLK1	C2orf89	MUM1L1	MYOCD	DIRAS3	PLCXD3	GATA4	GATM	PEG3-AS1	DHRS2	CADPS	C7	VSTM4	MGARP	ATRNL1	THSD7B	SIGLEC11	FAM150B	LAMA2	TSPAN5	LOC100507311	MAOB	WIPF3	UBXN8	GPM6A	PRRT1	SCN7A	PCSK6	ENPP6	ARHGAP6	NR1H4	PID1	JPH4	LOC284576	ABCA8	PRSS35	GPRASP1	ZIM2	ALLC	HLF	BAMBI
ov.tcga	null
Top genes:	MAK16:3	FUT10:3	CCDC25:3	CNOT7:3	WRN:3	GTF2E2:3	UBXN8:3	INTS10:2	CHMP7:2	VPS37A:2	PBK:2	ERI1:2	TNFRSF10A:2	PPP2R2A:2	XPO7:2	TTI2:2	AGPAT5:2	KCTD9:2	ELP3:2	CDCA2:2
17	ID67	4	0.350639
brca.gse2034	null
brca.tcga	RHOT2	CLCN7	WDR90	RNF40	NUBP2	MLST8	ZNF768	C16orf42	TSC2	NAA60	ALDOA	SPSB3	RABEP2	SETD1A	TUFM	SPNS1	WDR24	AXIN1	FLYWCH1	MRPL28	E4F1	GLYR1	PIGQ	SOLH	ZNF263	SNRNP70	RHBDF1	RAB40C	ZNF598	MAN2C1	TRAP1	RPUSD1	RAB11FIP3	ZNF213	ALDOAP2	HMOX2	NUDT16L1	PKD1	MPG	ZNF205	ROGDI	TNIP2	ATG2A	GTF3C1	PARP10	NARFL	NMRAL1	ZNF787	URGCP
coad.gse14333	null
coad.tcga	UPF1	ZNF629	SRRM2	NCOR2	TCF20	HCFC1	WIZ	HNRNPM	SPECC1L	UBN1	GOLGA3	GATAD2A	C19orf6	MICAL3	ITPR3	NOTCH1	SMARCA4	TNRC6B	MORC2	SRRT	LEMD2	HIC2	CTBP2	BRD1	CHERP	SAFB	TARDBP	TRRAP	SETD1B	TRIM56	CRAMP1L	TBC1D13	MLL3	RALGDS	TMEM184B	MLL4	MED13L	ARHGEF18	ARHGAP35	ILDR1	ZDHHC7	MNT	DDX42	ABR	HIP1R	CRKL	MYO1C	RBM10	AXIN1
ov.gse9891	MRPL4	CDC37	PIN1	FDX1L	DNM2	TYK2	KEAP1	RAVER1	UBL5	KRI1	PPAN	ELOF1	AP1M2	EIF3G	FBXL12	C19orf52	ATG4D	QTRT1	TMED1	FARSA	ZNF653	DNMT1	SMARCA4	YIPF2	C19orf43	WDR83OS	CDKN2D	PRKCSH	SWSAP1	STX10	ILF3	ECSIT	TRMT1	GCDH	FBXW9	RAD23A	GADD45GIP1	ASNA1	TNPO2	NDUFA7	ICAM3	TMEM205	DHPS	ZNF317	WDR83	SLC44A2	HOOK2	CC2D1A	C19orf53
ov.tcga	SPEN	ARID1A	SRRM1	TARDBP	ZC3H4	UBR4	FBXO42	CHD4	TPR	YLPM1	HNRNPR	EIF4G3	SETD1B	ZNF638	HCFC1	VPS13D	SRRM2	SRRT	MED1	SPTAN1	KIF1B	SMARCC2	RBBP6	UPF2	EIF4G1	ZMYM3	SNRNP70	PRRC2B	SRSF4	PRDM2	UBN1	MLL	USP34	CLCN6	CROCCP2	ZBTB40	CPSF7	SLTM	CDK11A	CLSTN1	SMPD4	USP48	MNT	KHDRBS1	PRRC2C	NKTR	SF1	ZNF512B	ZNF609
Top genes:	AXIN1:2	SNRNP70:2	SRRM2:2	HCFC1:2	UBN1:2	SMARCA4:2	SRRT:2	TARDBP:2	SETD1B:2	MNT:2	DDX42:2	RHOT2:1	CLCN7:1	WDR90:1	RNF40:1	NUBP2:1	MLST8:1	ZNF768:1	C16orf42:1	TSC2:1
18	ID103	4	0.348802
brca.gse2034	null
brca.tcga	ZNF155	ZNF223	ZNF230	ZNF222	ZNF45	ZNF227	ZNF224	ZNF283	ZNF226	ZNF235	ZFP112	ZNF180	ZNF225	ZNF304	ZNF568	ZNF527	ZNF284	ZNF285	ZNF233	ZNF547	ZNF615	ZNF468	ZNF432	ZNF419	ZNF17	ZNF548	ZNF404	ZNF813	ZNF583	ZNF187	ZNF790	ZNF529	ZNF567	ZNF416	ZNF780A	ZNF211	ZNF134	ZNF549	ZNF761	ZNF461	ZNF160	XRCC1	ZNF578	ZNF530	ZFP14	ZNF137P	ZNF181	ZNF383	ZNF600
coad.gse14333	null
coad.tcga	ZNF578	ZNF816	ZNF813	ZNF600	ZNF468	ZNF761	ZNF665	ZNF320	ZNF525	ZNF611	ZNF137P	ZNF160	ZNF613	ZNF28	ZNF765	ZNF83	ZNF155	ZNF416	BMPR1A	MAN2B2	ZNF567	LPAR5	GLUD1	ZNF8	ZNF227	MEX3C	SMAD4	ELAC1	ZNF230	ZNF571	MED4	CEP350	PTMA	ZNF702P	ZNF223	PRR12	CAPN7	ZNF432	TARBP1	PAPOLG	DIS3L2	ZBTB11	ZCCHC8	KDM5B	ESD	TBL1XR1	AGFG1	FAM35A	XPO5
ov.gse9891	ZNF227	ZNF45	ZNF222	ZNF180	ZFP112	ZNF226	ZNF230	ZNF223	ZNF225	ZNF224	ZNF234	ZNF285	ZNF235	ZNF283	LOC100505715	ZNF233	XRCC1	ZNF155	ZNF229	SMG9	ZNF576	ZNF404	IRGQ	ATP5SL	ZNF780A	HNRNPUL1	MEGF8	ERCC1	ZFP37	ZNF211	CCDC97	ZNF329	RPS19	DEDD2	TTC33	LOC100379224	ZNF569	SNRPD2	ZNF420	OPA3	ZNF610	ZNF614	C12orf4	PHLDB3	ZFP28	DDX47	ZNF260	NECAP1	ZNF304
ov.tcga	ZNF45	ZNF230	ZNF222	ZNF227	ZNF223	ZFP112	ZNF180	ZNF235	ZNF576	ZNF225	XRCC1	ZNF224	ZNF155	ZNF428	ATP5SL	ZNF134	ZNF329	PRPF31	ZNF350	ZNF419	MEGF8	CALM3	SMG9	ZNF606	SAE1	ZNF211	ZNF304	PPP5C	ZNF473	HNRNPUL1	ZNF226	ZNF274	WDHD1	AP2S1	EGLN2	BCKDHA	KDELR1	PVRL2	ERCC1	ZNF135	ZNF175	PIH1D1	PAF1	ZNF551	ZNF574	TOMM40	HNRNPH3	ZNF146	ZNF432
Top genes:	ZNF155:4	ZNF223:4	ZNF230:4	ZNF227:4	ZNF222:3	ZNF45:3	ZNF224:3	ZNF226:3	ZNF235:3	ZFP112:3	ZNF180:3	ZNF225:3	ZNF304:3	ZNF432:3	ZNF419:3	ZNF211:3	XRCC1:3	ZNF283:2	ZNF285:2	ZNF233:2
19	ID74	4	0.324535
brca.gse2034	null
brca.tcga	MIEN1	GRB7	STARD3	PGAP3	ERBB2	ORMDL3	PSMD3	MED1	TCAP	CDK12	MED24	GSDMB	CASC3	WIPF2	MSL1	PNMT	FBXL20	RPL19	PCGF2	THRA	CWC25	PIP4K2B	PSMB3	LASP1	RPL23	PPP1R10	CCDC56	SRCIN1	CYB561	MRPL45	TMUB2	MLLT6	RUNDC1	COASY	CDC6	BECN1	EPN3	HEXIM2	VPS25	FAM134C	ACBD4	NR1D1	NBR1	MFSD2A	RARA	C17orf28	SMARCE1	CDK5RAP3	LRFN2
coad.gse14333	KRTAP1-1	LOC100506165	CLEC3A	ACMSD	KRTAP3-2	ZIC1	ISM2	ANO3	KRTAP3-3	PGAP3	LRRN3	KRT40	ZPLD1	LINC00176	AMELX	CAPS2	SLC12A1	ERBB2	SMARCE1	DGKB	GRB7	MIEN1	SCN2A	LOC728715	KRTAP4-1	EIF1	REC8	HCN1	SLC25A21	WBSCR28	NDST4	CABP1	NBPF22P	LINC00461	MYH4	HPX	CYP2C19	MRAP	C17orf78	ATP6V0A4	ARMC2	ADAMTS18	LOC100507203	EMB	ERC1	GTSF1	UBL3	B3GALTL	MSRB2
coad.tcga	ZNF527	ZNF571	ZNF383	HKR1	ZNF567	ZNF585A	ZNF420	ZNF568	CYP7A1	FBXL20	GABRA3	ZNF283	ZNF345	ZNF570	TCAP	PROK1	MED1	OR5D18	OR13C4	TTC30B	PNMT	CDK12	CIDEA	SYBU	FOXA3	EMX2	PLIN1	ZNF461	ADIPOQ	PRSS8	STARD3	PPFIA2	ZNF540	HTR3D	ZNF829	COL11A2	DPPA5	TRIM43	ZNF558	ANXA3	CYB5A	GPR111	ZNF790	TNNT3	TFF3	FAAH2	CPLX4	TRH	MIEN1
ov.gse9891	ZNF571	ZNF420	ZNF607	HKR1	ZNF569	ZNF585A	ZFP30	ZNF383	ZNF567	LOC100507372	ZNF570	ZNF382	ZNF260	ZNF585B	ZNF829	ZNF573	ZNF302	LOC100507486	ZNF529	ZNF568	ZNF565	ZNF146	ZNF566	ZNF30	TBCB	LOC284408	ZNF345	ZFP82	ZNF793	KIAA0355	POLR2I	ZNF850	UBA2	HAUS5	PSMD8	ZNF599	ZNF507	LSM14A	ZNF527	ZNF780A	TMEM147	THAP8	GPATCH1	ALKBH6	ZNF780B	SDHAF1	RBM42	YIF1B	COX6B1
ov.tcga	null
Top genes:	MIEN1:3	GRB7:2	STARD3:2	PGAP3:2	ERBB2:2	MED1:2	TCAP:2	CDK12:2	PNMT:2	FBXL20:2	SMARCE1:2	ZNF527:2	ZNF571:2	ZNF383:2	HKR1:2	ZNF567:2	ZNF585A:2	ZNF420:2	ZNF568:2	ZNF345:2
20	ID79	4	0.317075
brca.gse2034	NEB	MYOT	MYL1	KBTBD10	CKM	TTN	MYL2	MYH2	CSRP3	TNNC2	TNNC1	SLN	CA3	ATP2A1	ACTA1	TPM3	TNNI1	ACTC1	MYLPF	MYBPC2	LPHN3	ST18	PYGM	MYH1	ACTN2	OLR1	TGFB2	RRAD	SMR3A	NEUROD1	MYF6	LDB3	CD207	PLD1	ACTN3	CRYBA1	SMR3B	MYOZ2	C7orf58	MYOZ1	KCNJ16	CA10	PLXNC1	GLT8D2	ANTXR1	SPINLW1	SMPX	COL6A1	WISP2
brca.tcga	MYL1	MYLPF	MYH2	XIRP2	LMOD2	CSRP3	VGLL2	MYL2	KBTBD5	MYH6	APOBEC2	HFE2	TNNI1	ASB10	TTN	CKM	ASB5	ABRA	MYH8	NRAP	LDB3	KBTBD10	STAC3	PYGM	UNC45B	MYOZ2	TMOD4	TRIM54	ATP2A1	MYL10	RPL3L	MYH1	MYH4	MYL3	C8orf22	MYOT	FBXO40	CAV3	ANKRD23	TNNC1	ACTC1	LMOD3	TRDN	MYPN	KCNA7	ENO3	MYH7	IGFN1	MYBPC2
coad.gse14333	KBTBD10	MYH1	TRDN	CSRP3	MYH8	TNNI2	CKM	MYL1	ACTA1	CA3	TNNT3	MYBPC2	TTN	SHOX2	SLN	MYBPC1	PRG4	TMOD4	MEGF10	MYLPF	TCAP	XIRP2	FGFBP2	RYR1	CHRNA1	FMO3	TNNC2	DDIT4L	LMOD3	WISP2	EBF2	MYF6	NR1D1	NEB	TNNI1	CYP26A1	RRAD	FBN2	CILP2	NOG	ANKRD23	ITGA10	APCDD1L	MYOT	IP6K3	RIT2	MB	HAS1	ATP2A1
coad.tcga	CATSPERD	RAB19	PRSS38	DCDC5	TMIE	HECW1	WDR69	OR13G1	XIRP2	ULBP1	DNAH3	TAGLN3	WDR49	DNAJB7	CCDC60	PPFIA2	ATP1B4	BNC1	MSTN	ZIM3	LRP2BP	GAS2L2	SPAG8	CAPSL	GNRHR	CXorf22	DNAH5	IQUB	FAM81B	CNBD1	C4orf26	SNCG	CXorf41	RSPH4A	CCER1	RSPH10B	ANXA8L2	LEFTY2	SLC10A6	LHB	C6orf165	YSK4	ANKS1B	DRD2	SERPINI2	C2orf73	OR52E2	C1orf192	VWA3A
ov.gse9891	null
ov.tcga	null
Top genes:	MYOT:3	MYL1:3	KBTBD10:3	CKM:3	TTN:3	CSRP3:3	ATP2A1:3	TNNI1:3	MYLPF:3	MYBPC2:3	MYH1:3	MYF6:3	XIRP2:3	NEB:2	MYL2:2	MYH2:2	TNNC2:2	TNNC1:2	SLN:2	CA3:2
21	ID55	4	0.316966
brca.gse2034	null
brca.tcga	HIST1H2BI	HIST1H2BL	HIST1H2BM	HIST1H2BE	HIST3H2BB	HIST1H2BO	HIST1H2BF	HIST1H2BB	H2BFS	HIST1H2BH	HIST1H2BD	HIST1H2BG	HIST1H2BJ	HIST1H1E	HIST1H2AD	HIST1H2AM	HIST1H2BK	HIST1H3H	HIST2H2BE	HIST1H4H	HIST1H1C	HIST1H2BN	HIST1H3D	HIST1H2AC	HIST2H2AA3	HIST1H2AE	HIST1H2AB	HIST1H2AK	HIST1H2AL	HIST1H3F	HIST2H2AB	HIST1H2AH	HIST1H2AI	HIST1H3B	HIST1H4I	HIST1H2AG	HIST3H2A	HIST1H4F	HIST2H2AC	OR2B6	HIST1H3E	HIST1H1D	HIST1H3G	HIST1H2AA	HIST1H1T	HIST1H4J	HIST1H4K	MRPS34	HIST1H2AJ
coad.gse14333	null
coad.tcga	HIST1H2BI	HIST1H2BO	HIST1H2BL	HIST1H2BE	H2BFS	HIST1H2BF	HIST1H2BM	HIST3H2BB	HIST1H2BB	HIST1H2BG	HIST1H2BJ	HIST1H2BD	HIST1H2BK	HIST1H2AD	HIST2H2BE	HIST1H1E	HIST1H2AM	HIST1H2BH	HIST1H1C	HIST1H2AE	HIST1H3H	HIST2H2AA3	HIST1H2BN	HIST1H2AC	HIST1H3D	HIST1H4H	HIST1H4I	HIST1H3B	HIST1H3E	HIST1H3F	HIST1H3G	HIST1H2AB	HIST2H2AB	HIST1H2AK	HIST1H2AL	HIST1H2AG	SYT8	MYL6	NTN4	HIST3H2A	ELP4	C11orf58	DAD1	PRADC1	HINT2	SIVA1	HIST1H2AA	MED19	HIST1H2AI
ov.gse9891	HIST1H4H	LOC100507025	HIST1H1C	HIST1H2BK	HIST1H3D	HIST1H2AM	HIST1H2AE	HIST1H2BD	HIST2H2BE	HIST1H2AI	HIST1H4E	HIST1H2BG	HIST1H4D	HIST1H2BO	HIST1H2BB	HIST1H2BJ	HIST1H1T	OR2B6	HIST1H2AB	HIST1H3B	FEN1	HIST1H4B	DNAJB11	COPB2	SLC33A1	C11orf82	RSRC1	TSEN15	CCDC167	TK1	KPNA2	SMC2	CKS1B	MRPL47	PMVK	PCCB	SMC4	ECT2	ALG3	FAM83D	CENPN	CDCA5	SCAMP3	FOXM1	SELT	KPNA4	SHCBP1	SLC25A16	PARL
ov.tcga	HIST1H2BF	HIST1H2BE	HIST1H2BH	HIST1H2BI	HIST1H3D	HIST1H4H	HIST1H1C	HIST1H3H	HIST1H2BK	HIST1H2BC	HIST1H2AC	HIST1H2AE	HIST1H2BD	HIST1H2AM	HIST2H2BE	HIST1H2BG	HIST1H2AG	HIST1H2BJ	HIST1H4E	HIST1H2BO	HIST1H3G	HIST1H3B	HIST3H2A	HIST1H3E	HIST1H2AB	DPM3	HDHD3	SFT2D2	SLC50A1	DCTN5	ACOX1	CYP51A1	SCP2	NSDHL	TCTA	ARF6	BAK1	SLC39A7	DERL1	FAM82B	C1GALT1C1	GOSR2	BCL7C	TRAPPC6A	TSPAN12	ERP44	ARF1	CDKN2C	SLC31A1
Top genes:	HIST1H2BO:4	HIST1H2BD:4	HIST1H2BG:4	HIST1H2BJ:4	HIST1H2AM:4	HIST1H2BK:4	HIST2H2BE:4	HIST1H4H:4	HIST1H1C:4	HIST1H3D:4	HIST1H2AE:4	HIST1H2AB:4	HIST1H3B:4	HIST1H2BI:3	HIST1H2BE:3	HIST1H2BF:3	HIST1H2BB:3	HIST1H2BH:3	HIST1H3H:3	HIST1H2AC:3
22	ID91	4	0.248589
brca.gse2034	FOS	DUSP1	FOSB	ZFP36	EGR1	CYR61	JUNB	IER2	JUN	EGR2	KLF2	NR4A1	SPRY1	GEM	KLF4	CTGF	LHFP	RGS1	CAV1	HBB	BTG2	CXCL12	ATF3	GADD45B	CDH5	COL15A1	ADH1B	RGS2	GNG11	SGK1	AKAP12	ABCA8	SFRP4	LDB2	DCN	TIE1	RHOB	PLSCR4	FABP4	SRPX	FHL1	MFAP4	ALDH1A1	CHRDL1	DPT	IGF1	FSTL1	RNASE4	TGFBR2
brca.tcga	null
coad.gse14333	null
coad.tcga	CXCL1	CXCL3	CXCL2	ZC3H12A	NFKBIZ	CCL20	SOCS1	VNN3	SAA4	IL1B	NAMPT	SOCS3	LCN2	SAA2	IL1A	CEBPD	SAA1	SOD2	TNF	MAP3K8	TYMP	IDO1	PI3	BATF3	NOS2	CASP10	CARD17	MMP3	CCL28	CXCL6	TNIP3	CASP1	IL8	PDE4B	BIRC3	ZBTB32	PTGS2	MMP25	BCL3	APOL1	NCOA7	IRF1	CXCR2	IL15RA	IL18RAP	CARD16	CFB	FAM189B	VNN1
ov.gse9891	FOS	DUSP1	FOSB	EGR1	ZFP36	NR4A1	JUNB	ATF3	CYR61	EGR3	EGR2	IER2	NR4A2	KLF6	KLF4	SOCS3	KLF2	GADD45B	CXCL2	CTGF	DUSP5	C11orf96	BTG2	CSRNP1	PPP1R15A	JUN	LOC284454	IL6	DUSP2	SIK1	NR4A3	NFKBIZ	SERPINE1	HBEGF	SLC25A25	LOC100302650	RGS2	RHOB	CEBPD	KLF10	PLK3	BHLHE40	SGK1	RGS4	MAFF	GEM	ECM2	NID2	SMOC2
ov.tcga	FOS	DUSP1	EGR1	FOSB	ZFP36	CYR61	JUNB	EGR3	NR4A1	ATF3	CTGF	EGR2	KLF6	IER2	JUN	CXCL2	PPP1R15A	HBA2	KLF4	GADD45B	RHOB	BTG2	KLF2	DUSP5	HBB	HBEGF	SERPINE1	RGS2	SOCS3	IER3	IL6	NR4A2	GEM	BHLHE40	SIK1	CEBPD	KLF10	NR4A3	DUSP2	PDLIM3	MCL1	CH25H	PLK2	THBS1	C8orf4	SGK1	GPR183	MAFF	EDN1
Top genes:	FOS:3	DUSP1:3	FOSB:3	ZFP36:3	EGR1:3	CYR61:3	JUNB:3	IER2:3	JUN:3	EGR2:3	KLF2:3	NR4A1:3	GEM:3	KLF4:3	CTGF:3	BTG2:3	ATF3:3	GADD45B:3	RGS2:3	SGK1:3
23	ID25	4	0.211036
brca.gse2034	KDELR1	ARF1	NUCB1	GNB2	P4HB	CLPTM1	CDC37	ASNA1	ACTB	POLR2E	DNAJC4	PLD3	DCTN1	NAPA	EIF2S3	TXLNA	PSMC3	YIPF5	CAPN1	RHOC	HMG20B	SNX17	TMED2	C19orf22	SERF2	CRK	NRBP1	C20orf30	MGAT4B	TSC2	LRRC41	CCNL2	PSENEN	TLN1	BSG	PPP1CA	MPDU1	CRIP2	COPE	ARHGDIA	SNORA64	BTBD2	CAPNS1	HSP90AB1	CNOT3	OGDH	SH3GLB2	AES	ABL1
brca.tcga	HSP90AB3P	HSP90AB6P	HSP90AB1	HSP90AA6P	POLH	PPP2R5D	HSP90AA1	BRD2	CCNF	NOP14	CTCF	MTCH1	UTP14A	STIP1	PSMD2	TAF1L	CRCP	MAPK14	KLHDC3	GMEB2	AFG3L2	RNF216	RXRB	EIF4G1	MARS	AP5B1	UBL4A	UBQLN4	CARS	TUBA1A	CDC5L	TNPO3	PTBP1	XPO5	SLC35E1	HCFC1	H2AFY	TH1L	POLR1C	WHSC2	FIP1L1	EWSR1	MRPL14	KCTD20	KPNB1	ZNF341	C6orf106	GNL3L	TYW1B
coad.gse14333	null
coad.tcga	HSP90AB1	HSP90AB3P	HSP90AB6P	BYSL	CDC5L	TJAP1	MAD2L1BP	XPO5	AARS2	PPP2R5D	UBR2	C6orf130	SRF	SLC35B2	MEA1	RRP36	CUL9	GTPBP2	KLHDC3	KHSRP	TBCC	ZNF318	USP49	TMEM63B	MRPS18A	KIAA0240	ABCC10	SLC29A1	CUL7	RIOK1	FRS3	RPL7L1	NOL7	MRPL14	BTBD9	GALNTL5	MARCH4	PIEZO2	VEGFA	FARSA	MCM3	MED20	FAM171A1	EHMT2	NELF	CNPY3	MED22	C6orf108	MRPS10
ov.gse9891	YIPF3	TJAP1	MEA1	BYSL	CNPY3	CUL7	RRP36	TBCC	UBR2	MAD2L1BP	GTPBP2	MRPL14	MED20	ZNF318	TOMM6	SLC35B2	ABCC10	KLHDC3	XPO5	LOC220906	POLR1C	KLC4	MRPS18A	SAYSD1	AARS2	MRPS10	C6orf89	C6orf130	FRS3	TAF8	HSP90AB1	PPP2R5D	ZFAND3	SRF	GLO1	CDC5L	VPS52	KIAA0240	C6orf132	FTSJD2	PPIL1	POLH	MTCH1	MRPL2	CUL9	C6orf108	MAPK14	BAG6	BRPF3
ov.tcga	null
Top genes:	HSP90AB1:4	PPP2R5D:3	KLHDC3:3	CDC5L:3	XPO5:3	MRPL14:3	HSP90AB3P:2	HSP90AB6P:2	POLH:2	MTCH1:2	MAPK14:2	POLR1C:2	BYSL:2	TJAP1:2	MAD2L1BP:2	AARS2:2	UBR2:2	C6orf130:2	SRF:2	SLC35B2:2
24	ID139	4	0.179021
brca.gse2034	null
brca.tcga	NACA2	NACA	NACAP1	EIF4B	HNRNPA1	PFDN5	NSA2	BTF3	COPZ1	LETMD1	EPB41L4A-AS1	RPS4X	ATP5G2	R3HDM2	ANKRA2	RPL3	ANKRD42	RPS14	RPL41	TPT1	RPL26	FLJ44635	CAMLG	RPS23	CLK4	TTC8	SUOX	C10orf32	XPA	ZFP62	CSAD	SYF2	IK	CASC1	RIOK2	BRD8	WIBG	RPL14	CYB5A	KIAA0141	AUH	GNB2L1	LRRC56	PAN2	COMMD10	RPL6	LZTFL1	LIMA1	MAP3K12
coad.gse14333	null
coad.tcga	NACA2	NACA	NACAP1	EIF4B	SLC38A1	HNRNPA1	SUDS3	ZBTB39	ANKLE2	ZNF664	UBE3B	ZNF407	RAB3IP	PRDM4	RPL6	LETMD1	GXYLT1	METAP2	SMARCD1	EP400	DIP2B	CNOT2	ARID2	SBNO1	TFCP2	FBXO21	POLR3B	ATP2A2	ZNF146	RAB21	R3HDM2	BCLAF1	MED13L	PPM1H	CCNJ	SETD1B	FKBP4	CIT	GCN1L1	DUSP16	PEX5	TNRC6B	KDM2B	KLHDC5	TULP4	KIAA0528	SERBP1	ADCY6	NFYB
ov.gse9891	ZNF84	ZNF605	ZNF140	ZNF268	ZNF10	METAP2	FBRSL1	C12orf76	UNC119B	EP400	RSRC2	SFSWAP	USP30	SBNO1	PRDM4	IFT81	ZNF664	C12orf43	SPPL3	ADAM1	DENR	RPL6	RILPL1	ANKLE2	APPL2	ZNF891	ZNF667	RBM12	RAN	DYNC2LI1	C12orf73	DIABLO	DDX55	WDPCP	ZFP37	VEZT	EIF2B1	UBE2N	MAP4K3	AADAT	ATXN2	RNF34	ZNF606	PTCD3	SART3	C14orf135	NR2C1	DDX51	TIA1
ov.tcga	SART3	PRDM4	ATXN2	RSRC2	PTPN11	GCN1L1	EP400	SFSWAP	POLR3B	PWP1	SSH1	ZNF84	ATP2A2	RNF34	DENR	MED13L	RNF10	IFT81	UBE3B	UTP20	EIF2B1	ZDHHC17	UNG	NFYB	APPL2	GOLGA3	CDK17	ANAPC5	CRY1	DDX54	BRAP	C12orf43	TDG	ZCCHC8	CKAP4	MAPKAPK5	RBM19	PPP1CC	ISCU	PPP1R12A	SETD1B	MLEC	TXNRD1	ACTR6	HNRNPR	TRAFD1	TARDBP	CAMKK2	UNC119B
Top genes:	RPL6:3	PRDM4:3	EP400:3	NACA2:2	NACA:2	NACAP1:2	EIF4B:2	HNRNPA1:2	LETMD1:2	R3HDM2:2	ANKLE2:2	ZNF664:2	UBE3B:2	METAP2:2	SBNO1:2	POLR3B:2	ATP2A2:2	MED13L:2	SETD1B:2	GCN1L1:2
25	ID26	4	0.17464
brca.gse2034	null
brca.tcga	CBWD1	CBWD6	CBWD5	UNC50	CAPZA2	SLC35B3	PRDX3	COPS4	TRMT61B	SLC35A5	ACTR10	LAMTOR3	C9orf156	DYNC2LI1	TMEM66	NIPSNAP3B	NDUFA10	PACRGL	TXNDC9	ZNF684	PSMD10	SNAP23	SELT	VBP1	SCP2	MYCBP	RAB28	IKBKAP	HIAT1	C4orf29	ABCD3	ORC5	HNRNPA2B1	FAM206A	AP5M1	FBXO4	C14orf129	RPL10A	CHUK	MORF4	FYTTD1	EIF1B	SYPL1	GMFB	GSPT1	VPS4B	PSMA2	PCNP	ERLEC1
coad.gse14333	null
coad.tcga	TAF1	HUWE1	TAF1L	BRWD3	GRIPAP1	HTATSF1	THOC2	LAS1L	GNL3L	USP9X	ZDHHC9	OTUD5	UTP14A	BOD1L1	OPHN1	ANKRD11	TSR2	SLC35E4	PDHA1	PHF8	FAM123B	NFIX	KDM5C	LARP1	BDP1	BRCC3	INE1	POLA1	ATP6AP1	MED12	DKC1	MECP2	DCAF16	BCAP31	ILDR1	KIDINS220	MGC10814	ATRX	UPF3B	GIGYF2	ZNF275	GOLGA2P5	ENOX2	MLL3	MALAT1	XIAP	MTMR1	CLEC16A	SFSWAP
ov.gse9891	FAM3A	TAZ	IDH3G	MECP2	NAA10	IRAK1	EMD	BCAP31	FAM50A	FAM58A	IKBKG	GDI1	SLC10A3	MTCP1NB	UBL4A	NSDHL	LAGE3	TMEM187	F8A1	VBP1	MTM1	ABCD1	ATP6AP1	MMGT1	DKC1	PLXNA3	G6PD	DNASE1L1	TMEM185A	SLC9A6	FUNDC2	VAMP7	SSR4	HAUS7	SLC25A5	MTCP1	FAM122B	VMA21	NUDT22	FAM127B	UBE2A	NDUFA1	MTMR1	BRCC3	TMLHE	CD99L2	ARHGAP4	B3GAT3	BRMS1
ov.tcga	PSMD10	HSPA8	RHOA	MMADHC	CCT4	ZNHIT3	CALM2	PGK1	ZNF207	COPS4	SKP1	GLRX3	NFU1	HAT1	SPCS1	RAB1A	C1D	PTGES3	GDE1	UGP2	RCHY1	SLC25A5	PNO1	CNIH	RAN	SRSF3	TMCO1	SELT	SDHC	COPS3	PRMT5	WDR61	ILF2	CHCHD2	PDCD10	PIGF	NDUFAB1	PSMA2	UNC50	PSMA3	MED21	SNX17	DAD1	SF3B5	SRP9	MOB4	DCTN3	SRSF2	PSMA5
Top genes:	UNC50:2	COPS4:2	PSMD10:2	SELT:2	VBP1:2	PSMA2:2	BRCC3:2	ATP6AP1:2	DKC1:2	MECP2:2	BCAP31:2	MTMR1:2	SLC25A5:2	CBWD1:1	CBWD6:1	CBWD5:1	CAPZA2:1	SLC35B3:1	PRDX3:1	TRMT61B:1
26	ID92	4	0.16554
brca.gse2034	SERPINB3	SERPINB4	RHCG	SCEL	SERPINB7	SERPINB2	ALPP	CPS1	C6orf15	KCNG1	BMP6	AVPI1	CRCT1	FGFBP1	SERPINB13	KRT6C	TNNC1	TGM1	INSL4	MAL	ZNF750	GPR17	FERMT1	GJB3	EMR2	MPZL2	IVL	TAL1	HAL	OCA2	AFF2	KRT4	EDAR	EN2	KLK10	KCNJ15	WISP3	GPR12	GABRA5	PRSS12	KLK8	RPH3A	PI3	APOH	CALCA	CEP72	STEAP4	AIM1L	GAD2
brca.tcga	SPRR2F	SPRR2D	SPRR1B	SPRR1A	SERPINB13	CERS3	CARD18	TMPRSS11D	SERPINB4	C10orf99	SERPINB3	LCE3D	IL36G	IL20RB	DEFB103A	SPRR2G	CLCA3P	GBP6	HOXD11	IL1A	GAP43	CABP2	DUSP7	KRTAP19-1	CXorf58	DUOXA2	RNASE7	PGLYRP4	MYBPHL	FOXE1	SLC10A6	DEFB4A	TNFSF9	KRT79	CASP14	PERP	GJB6	SOX15	S100A12	DENND2C	FAM83C	CDH16	SMCP	FAT2	OR6M1	REG1A	GPR115	PGLYRP3	SFN
coad.gse14333	null
coad.tcga	SPRR2F	SPRR2D	SPRR1B	SPRR3	SPRR1A	SERPINB3	SERPINB4	ABCA12	SERPINB2	S100A3	ZNF385A	SERPINB8	METAP2	CALB1	SLMAP	FLNC	LY6D	KRT16P3	RHOV	DARC	C1orf110	TNF	RETN	CAMP	PKM	KRT6C	SLC2A3	GPR84	DDX25	UBE2N	KLK11	ARHGEF4	GNA15	FCN1	KRT6A	CSMD1	HTRA4	DYM	NAV3	PTPRU	TRIB2	IL36RN	TNFSF9	TTC9	CTSG	MUCL1	VRTN	PPTC7	TRIAP1
ov.gse9891	FGFBP2	CALCA	MMP20	CALCB	FOXE1	IMPG1	PM20D1	EN1	LRRC7	SFTA3	KCNK12	PXDNL	LOC100507336	INSC	RTN4RL2	BHMT	KRT77	DRD1	DYSF	LOC100131691	NKX2-1	TMEM74	FAM41C	SPOCK3	ARHGEF26-AS1	FLJ42875	NKX2-1-AS1	IGSF5	C1orf95	IGSF1	BPIFA2	LOC100505760	MTMR10	PRL	CDH16	MAST2	GRID1	ZNF280A	MYO1G	EGF	HOXB9	PPP1R1C	PTPRZ1	HCFC1	DGCR5	SYPL2	PACRGL	TRPM1	ASZ1
ov.tcga	null
Top genes:	SERPINB3:3	SERPINB4:3	SERPINB2:2	SERPINB13:2	KRT6C:2	CALCA:2	SPRR2F:2	SPRR2D:2	SPRR1B:2	SPRR1A:2	FOXE1:2	TNFSF9:2	CDH16:2	RHCG:1	SCEL:1	SERPINB7:1	ALPP:1	CPS1:1	C6orf15:1	KCNG1:1
27	ID88	4	0.118033
brca.gse2034	null
brca.tcga	CYP2A7	CYP2A6	CYP2A13	ESR1	FAM134B	CCDC170	TBC1D9	EGLN2	THSD4	ZNF552	AGR3	SLC39A6	TPRG1	FSIP1	CPB1	CNTD1	ACADSB	RGS22	DACH1	CA12	SPINK4	MLPH	ANXA9	TMPRSS6	PKIB	DBNDD2	FOXA1	PCP2	RUNDC1	RABEP1	KIAA1467	XBP1	ARSG	CSAD	MAG	RERG	AGR2	GATA3	KDM4B	IGFALS	SIAH2	NECAB3	AR	DNAJC12	DAZAP2	SPDEF	GAMT	TLE3	SLC44A4
coad.gse14333	SPINK4	FCGBP	MUC2	ITLN1	HEPACAM2	REG4	CLCA1	LINC00261	B3GNT6	ZG16	ST6GALNAC1	MUC4	RETNLB	ATOH1	CAPN9	KIAA1324	CHST5	SI	BCAS1	AGR3	ASRGL1	KLK1	PCSK1	VSIG2	SPDEF	PTGER2	AQP3	GALNT8	PLA2G2A	RASD1	ZBTB7C	TOX	FOXA3	CREB3L1	REG1A	HSPA2	CLCA4	CA2	GNE	TPSG1	O3FAR1	RAB27A	KLF4	SERPINA1	ATP2A3	SLC4A4	PLAC8	GCG	ADTRP
coad.tcga	ADH1C	ADH1A	ADH1B	TMIGD1	GUCA2B	MS4A12	SCARA5	CLCA4	ITLN2	AQP8	BEST2	CEACAM7	CHGA	SI	GUCA2A	ZG16	AMPD1	CLCA1	CA2	DNASE1L3	UGT1A8	ADAMDEC1	ADTRP	GBA3	KCNK10	DUOX2	NAT2	MFSD4	CA4	GCG	VSIG2	PBLD	CHP2	CA1	CWH43	RSPH9	PTGDS	PRKACB	HPGDS	IGKC	NPY1R	FAM55D	PYY	SST	C2orf88	SPIB	MS4A8B	MFSD6L	ENTPD5
ov.gse9891	OR7A5	DEFA5	GPX5	NRSN1	MYH7B	KLK1	HS3ST4	SEZ6L	KLK4	KLK3	LOC100507274	SLC6A2	ANKFN1	ZNF831	ATP13A4	NODAL	BDNF-AS	SLC22A11	SEMA3D	DDX53	MAB21L3	GFRA3	SERPINA12	PLD5	NMUR2	PTGDR	PIRT	INSL3	HS3ST5	PAH	FMO5	TRH	LOC100507008	ADCY1	SHISA6	PSORS1C2	LOC100132354	LOC100129662	WNT16	PROX1	CST2	PRDM13	IHH	ABHD12B	APOH	DKK4	GREB1L	HEPACAM2	ADAMTSL2
ov.tcga	null
Top genes:	AGR3:2	SPINK4:2	SPDEF:2	HEPACAM2:2	CLCA1:2	ZG16:2	SI:2	KLK1:2	VSIG2:2	CLCA4:2	CA2:2	GCG:2	ADTRP:2	CYP2A7:1	CYP2A6:1	CYP2A13:1	ESR1:1	FAM134B:1	CCDC170:1	TBC1D9:1
28	ID98	4	0.109242
brca.gse2034	MT1H	MT1G	MT1X	MT2A	MT1F	MT1E	AVEN	SFN	TUBA4A	CSNK2A2	NUP93	CIAPIN1	KARS	MMP3	TEAD4	NPM3	YARS	CDH3	SCPEP1	UPP1	SCG5	CENPN	ADM	KRT17	C11orf75	C16orf61	COX4I1	N4BP1	PGM1	RRM2	PLAC8	DSC3	VPS4A	KRT5	S100A2	TMEM45A	BRD7	COX4NB	PHGDH	CD97	SF3A3	SOD2	PSMD7	KRT6B	MID1	TLE4	TUBB6	UQCRC1	SHCBP1
brca.tcga	MT1H	MT1B	MT2A	MT1G	MT1X	MT1JP	MT1M	MT1E	CXCL1	FAM212B	NIP7	RARRES1	ACD	NFIL3	UPP1	CMC2	C15orf39	NOB1	SOD2	EPHB6	CIRH1A	ORC1	DEFB1	KIF2C	EMC8	RNF145	P2RY6	FOSL1	BOLA3	GPR56	ABTB2	PRNP	CX3CL1	NCOA7	LCAT	CXCL3	GAL	TNFRSF8	FPR2	IL1R2	POLR2C	S100A2	CENPN	TOMM5	GJB3	AAED1	CD7	DDX26B	IL15RA
coad.gse14333	MT1H	MT1G	MT1X	MT2A	MT1E	MT1F	RAB27A	RNF125	SLC4A4	SGK1	C10orf54	CD69	PLA2G2A	PLAC8	PLCL2	TMEM45A	BIRC3	C12orf57	FAM46C	ISG20	CRIP1	TPBG	SPON1	SERF2	C16orf54	ETS1	AGR3	SAMD9	RARRES1	VNN1	CTSE	GLIPR2	GPR126	MBOAT1	TNFAIP8	CCPG1	CXCR4	FCGBP	RGS2	CD14	MMP28	COTL1	ZG16	SAMD9L	O3FAR1	CYTIP	AHNAK	FSCN1	EDEM1
coad.tcga	MT1H	MT1B	MT1JP	MT1G	MT2A	MT1M	MT1X	MT1E	ZNF222	RTP4	HLA-DPB1	CFD	FAM114A1	C1RL	SERTAD4	IL7	S100A13	DNAJC22	RHOF	DENND2D	LINC00341	KCTD1	LYL1	ZNF35	SIGIRR	TNFRSF14	BPIFA2	UST	INPP1	ANXA1	S100A6	TLR6	DBT	TNNI2	ITM2A	ATP8B1	HRK	LY86	CFL2	SURF1	FRRS1	RGS2	CBS	PKIB	MAK	LIF	SSPN	C10orf10	KCNS2
ov.gse9891	null
ov.tcga	null
Top genes:	MT1H:4	MT1G:4	MT1X:4	MT2A:4	MT1E:4	MT1F:2	UPP1:2	CENPN:2	PLAC8:2	S100A2:2	TMEM45A:2	SOD2:2	MT1B:2	MT1JP:2	MT1M:2	RARRES1:2	RGS2:2	AVEN:1	SFN:1	TUBA4A:1
29	ID54	3	0.542938
brca.gse2034	null
brca.tcga	KRT6B	KRT17	KRT16P3	KRT6C	KRT6A	KRT5	MIA	TRIM29	KRT14	ANXA8L2	KLK6	KLK5	GABRP	KLK8	ROPN1	KRT16	PPP1R14C	ROPN1B	BBOX1	KLK7	SOSTDC1	SERPINB5	SFRP1	LEMD1	DSG3	FOXC1	COL17A1	DSC3	BCL11A	FERMT1	VGLL1	CDH3	SHC4	S100A2	LY6D	SOX10	KLK10	STAC2	SYT8	FABP7	FOXL1	SLC6A14	SRSF12	IL34	CALML3	ACTG2	STAC	CNTNAP3	PROM1
coad.gse14333	MRPS26	MKKS	TRMT6	PSMF1	PCNA	SNRPB	CSNK2A1	SNRPB2	STK35	IDH3B	FASTKD5	SNX5	SEC23B	NDUFAF5	PET117	TASP1	ESF1	NSFL1C	NOP56	DDRGK1	NAA20	CRLS1	C20orf72	CENPB	PANK2	LINC00493	TBC1D20	PTPRA	MCM8	CRNKL1	TMEM230	CDS2	VPS16	MAVS	SRXN1	ANKRD5	NXT1	ZCCHC3	C20orf27	POLR3F	RBBP9	ITPA	KIF16B	C20orf196	CSRP2BP	XRN2	BTBD3	DTD1	UBOX5
coad.tcga	TRMT6	CRNKL1	CRLS1	POLR3F	PSMF1	NAA20	CDS2	CSNK2A1	SNRPB2	MKKS	PANK2	IDH3B	ITPA	PCNA	DDRGK1	TASP1	XRN2	TMEM230	NXT1	SNX5	C20orf72	NSFL1C	DSTN	GZF1	MRPS26	SEC23B	NOP56	SNRPB	C20orf27	NDUFAF5	MCM8	PTPRA	VPS16	RBBP9	SRXN1	TBC1D20	AP5S1	FERMT1	FKBP1A	ZCCHC3	ANKRD5	NANP	FASTKD5	ESF1	CSRP2BP	ZNF133	ZNF343	C20orf3	FAM110A
ov.gse9891	null
ov.tcga	null
Top genes:	FERMT1:2	MRPS26:2	MKKS:2	TRMT6:2	PSMF1:2	PCNA:2	SNRPB:2	CSNK2A1:2	SNRPB2:2	IDH3B:2	FASTKD5:2	SNX5:2	SEC23B:2	NDUFAF5:2	TASP1:2	ESF1:2	NSFL1C:2	NOP56:2	DDRGK1:2	NAA20:2
30	ID57	3	0.540755
brca.gse2034	null
brca.tcga	ZNF675	ZNF85	ZNF43	ZNF681	ZNF117	ZNF678	ZNF479	ZNF826P	ZNF208	ZNF676	ZNF99	ZNF253	ZNF430	ZNF254	ZNF429	ZNF141	ZNF492	ZNF714	ZNF708	ZNF486	ZNF431	ZNF100	ZNF680	ZNF91	ZNF107	ZNF493	ZNF92	ZNF626	ZNF709	ZNF442	ZNF625	ZNF595	ZNF441	ZNF799	ZNF763	ZNF700	ZNF443	ZNF682	ZNF791	ZNF433	ZNF20	ZNF564	ZNF823	ZNF426	ZNF160	ZNF665	ZNF136	ZNF138	KIAA1279
coad.gse14333	null
coad.tcga	ZNF675	ZNF117	ZNF43	ZNF85	ZNF430	ZNF681	ZNF99	ZNF253	ZNF826P	ZNF708	ZNF486	ZNF431	ZNF479	ZNF678	ZNF254	ZNF100	ZNF680	ZNF92	ZNF429	ZNF107	ZNF492	ZNF141	ZNF91	ZNF208	ZNF626	ZNF790	ZNF345	ZNF714	ZNF709	ZNF493	ATAT1	TAF4	ADNP	HKR1	ZNF571	ZNF563	ZNF420	ZNF570	ZNF540	ZNF500	CHAMP1	ELF1	USPL1	ZNF461	ZFP30	ZNF44	ZNF585A	CDK13	ATP5E
ov.gse9891	POLR2I	TBCB	RBM42	COX6B1	SDHAF1	TMEM147	THAP8	MLL4	LIN37	ALKBH6	ZNF146	PDCD2L	ZNF565	U2AF1L4	HKR1	LSM14A	ZNF383	PSMD8	CAPNS1	ZNF585B	YIF1B	GPATCH1	HAUS5	ZNF607	KIAA0355	PDCD5	ZNF567	EIF3K	ZNF585A	ZNF260	ZNF829	SARS2	ZNF599	ANKRD27	ZNF507	UBA2	CEP89	ZNF571	ZNF420	TIMM50	ZFP82	ECH1	C19orf55	MRPS12	ZNF345	ZNF570	ZNF30	LOC100506469	USF2
ov.tcga	null
Top genes:	ZNF675:2	ZNF85:2	ZNF43:2	ZNF681:2	ZNF117:2	ZNF678:2	ZNF479:2	ZNF826P:2	ZNF208:2	ZNF676:2	ZNF99:2	ZNF253:2	ZNF430:2	ZNF254:2	ZNF429:2	ZNF141:2	ZNF492:2	ZNF714:2	ZNF708:2	ZNF486:2
31	ID15	3	0.443643
brca.gse2034	null
brca.tcga	ZNF417	ZNF530	ZNF134	ZNF154	ZNF211	ZNF17	ZNF304	ZNF548	ZNF419	ZNF551	ZNF416	TRAPPC2P1	ZNF256	ZNF776	ZNF543	ZNF264	ZNF773	ZNF606	ZNF549	ZNF160	ZNF761	ZNF274	ZNF665	ZNF586	ZNF137P	ZNF418	ZNF578	ZNF547	ZNF816	ZNF813	ZNF329	ZNF772	ZNF615	ZNF83	ZNF468	ZNF584	ZNF324	ZNF587	ZNF550	CHMP2A	TRIM28	ZNF544	ZNF600	VRK3	ZNF432	PTOV1	ZNF765	ZNF614	ZNF320
coad.gse14333	null
coad.tcga	SLC35E4	ILDR1	INE1	MGC10814	RAX2	PDZD7	GUSBP2	SLC7A5P2	KLC3	MYO1C	POLR3E	MAVS	MALAT1	NFAT5	AGAP8	MLL3	KCNH6	PHIP	MGEA5	EXOC3L2	NKTR	OPHN1	GOLGA2P2Y	NRIP2	GNL3L	NBPF3	ATXN7	SFSWAP	ZKSCAN1	SLX4	ZNF652	PILRB	KIDINS220	ATM	TNFSF14	SF1	SUGP2	ANKRD11	FBXW11	FUT6	ANKRD36B	PRRC2B	NCOR2	MADD	DGCR8	KIAA1109	SPEN	DDX23	PNISR
ov.gse9891	null
ov.tcga	LRTOMT	HAUS2	ATP8B1	MBTD1	TSR1	POLR1B	ZNF611	PDE4C	BBS5	XRCC2	GPR1	SCD5	PCDHGA8	NKTR	EBLN2	DAPP1	SND1-IT1	SF1	ATXN7	SCAF4	ZNF665	MGC13053	NFAT5	LINC00597	CSAD	PILRB	SUGP2	TRA2A	KIAA0754	KIAA0664L3	RBM25	PRRC2C	CCNL2	LINC00260	ZNF587	ANKRD36B	ERN2	MLL	POU2F1	SCIN	C4orf29	SOGA1	ALMS1	LUC7L3	PHF20L1	EZH1	TARDBP	PNISR	GP6
Top genes:	ZNF665:2	ZNF587:2	NFAT5:2	NKTR:2	ATXN7:2	PILRB:2	SF1:2	SUGP2:2	ANKRD36B:2	PNISR:2	ZNF417:1	ZNF530:1	ZNF134:1	ZNF154:1	ZNF211:1	ZNF17:1	ZNF304:1	ZNF548:1	ZNF419:1	ZNF551:1
32	Estrogen Receptor Attractor (Breast)	3	0.294784
brca.gse2034	FOXA1	MLPH	AGR2	GATA3	CA12	SPDEF	XBP1	TBC1D9	ABAT	TFF3	FBP1	MAGED2	SLC39A6	LRBA	SCUBE2	CYB5A	AR	DNAJC12	SLC7A8	SLC22A5	DNALI1	ANXA9	RHOB	TFF1	MYB	TTC39A	NAT1	FAM174B	KRT18	ERBB4	VAV3	MYO5C	GPD1L	C6orf211	SUOX	ESR1	C14orf45	KDM4B	CIRBP	P4HTM	GALNT7	MAPT	CRIP1	CELSR1	SIDT1	DALRD3	TSPAN13	CACNA1D	REEP5
brca.tcga	AGR3	ESR1	MLPH	CA12	AGR2	CCDC170	THSD4	SCUBE2	FOXA1	ANXA9	TBC1D9	FSIP1	NAT1	GATA3	XBP1	C1orf64	ABCC8	DNALI1	TFF3	SPDEF	CLSTN2	PRR15	ERBB4	AR	INPP4B	SLC44A4	ZMYND10	SLC7A8	DNAJC12	EVL	GFRA1	FBP1	ZNF552	DACH1	SIDT1	ARSG	SLC39A6	GAMT	FAM214A	ABAT	PCP2	TSPAN1	LRRC46	KDM4B	MAPT	DYNLRB2	LRFN2	MAGED2	C9orf116
coad.gse14333	null
coad.tcga	HIST1H2AJ	H2AFJ	HIST1H2AH	HIST1H2AK	HIST1H2AG	MLH1	RAB32	LINC00526	EPM2AIP1	TUG1	CHRNG	ACR	EPDR1	HIST1H2AI	PPP1R14C	RNLS	PRR15	HSPH1	MCMDC2	KLHL23	SYN3	NEURL2	SCAND1	VAV3	PRSS23	SEMA5A	PRDX5	ERP27	PLAGL2	RPS6KA6	ROMO1	TSPAN6	PIWIL2	TXNDC9	TDGF1	AXIN2	MAN2A1	CCDC170	TEKT5	SLC39A5	GRM8	GSPT2	PTCD2	ROCK2	C10orf47	SPIN3	SLC19A3	AMACR	GGH
ov.gse9891	null
ov.tcga	null
Top genes:	FOXA1:2	MLPH:2	AGR2:2	GATA3:2	CA12:2	SPDEF:2	XBP1:2	TBC1D9:2	ABAT:2	TFF3:2	FBP1:2	MAGED2:2	SLC39A6:2	SCUBE2:2	AR:2	DNAJC12:2	SLC7A8:2	DNALI1:2	ANXA9:2	NAT1:2
33	ID76	3	0.273249
brca.gse2034	null
brca.tcga	PSG8	PSG4	PSG3	PSG6	PSG9	PSG7	PSG2	PSG1	PSG5	PSG11	F2RL1	KRT80	MYL6	SMYD2	CCDC68	AMOTL2	GULP1	OR52L1	LNPEP	ADAM9	CCDC116	TNFRSF12A	RAB21	MS4A3	NKX3-2	PPT1	C15orf39	SLC38A4	ACTR10	DAZ2	PQLC3	COQ10B	ADK	MEAF6	POLE4	PCYT1B	PADI3	CNEP1R1	NEU1	C6orf223	USP9Y	SNX18	PAEP	TTTY14	TRIM49	TRIM66	CD55	TRAM1	PKD1L2
coad.gse14333	null
coad.tcga	null
ov.gse9891	GNL2	UTP11L	MEAF6	C1orf109	MTF1	SNIP1	YRDC	PPIE	SF3A3	INPP5B	TRIT1	EBNA1BP2	DPH2	ADPRHL2	PPIH	MYCBP	RRAGC	AKIRIN1	NDUFS5	C1orf122	MACF1	PABPC4	EIF2B3	CDCA8	MRPS15	TOE1	TMEM69	CTPS1	ZMPSTE24	NSUN4	DMAP1	PPCS	C1orf50	ZNF643	CCDC23	ZNF684	RLF	YBX1	KDM4A	LSM10	FOXJ3	ERI3	NFYC	EIF2C3	POMGNT1	RIMS3	MED8	TRAPPC3	DEM1
ov.tcga	MYCBP	PPIE	EBNA1BP2	ZMPSTE24	TRIT1	MEAF6	CTPS1	RLF	CAP1	RRAGC	C1orf50	PPCS	PPIH	UTP11L	MED8	SNIP1	PPT1	ERI3	MRPS15	PSMB2	C1orf109	TRAPPC3	AKIRIN1	NDUFS5	NFYC	YBX1	CDCA8	DPH2	PABPC4	YRDC	ELOVL1	MYCL1	ATP6V0B	C1orf216	TSFM	ZNF643	LRRC42	GNL2	EIF2B3	FOXJ3	PSMA5	SCMH1	PSMD10	UROD	MAGOH	TM2D1	HSPB11	TOE1	YIPF1
Top genes:	MEAF6:3	PPT1:2	GNL2:2	UTP11L:2	C1orf109:2	SNIP1:2	YRDC:2	PPIE:2	SF3A3:2	TRIT1:2	EBNA1BP2:2	DPH2:2	PPIH:2	MYCBP:2	RRAGC:2	AKIRIN1:2	NDUFS5:2	PABPC4:2	EIF2B3:2	CDCA8:2
34	ID32	3	0.219346
brca.gse2034	null
brca.tcga	POU5F1P3	POU5F1	POU5F1P4	HGFAC	APOA1	AHSG	AQP2	TM4SF5	PRODH2	PASD1	APOA2	TYR	HBE1	TCF20	VRTN	APOC3	HBZ	HBG1	ALAS2	ITIH2	F2	DCT	PDIA2	RPS4Y1	NT5C1B	IGFBP1	TPD52L3	NR0B2	KLF1	FTCD	POM121L8P	ASGR2	PAPD7	AMBP	MYL4	RHOXF2B	TTR	C21orf62	DSCAM	FABP1	KCNV2	LDHAL6A	TRIML2	RPS4Y2	ZC3HAV1L	GLIS3-AS1	FOSL1	GGNBP1	AJAP1
coad.gse14333	STAU1	YTHDF1	C20orf11	YWHAB	NCOA6	PIGU	ASXL1	RPRD1B	DYNLRB1	C20orf4	C20orf111	TP53RK	TRPC4AP	CTNNBL1	ADNP	DNAJC5	TM9SF4	RNF114	TAF4	RALY	DDX27	EIF6	TTI1	PLAGL2	KIF3B	DPM1	RALGAPB	PSMA7	STK4	ERGIC3	SLC35C2	SPATA2	MOCS3	TTPAL	ARFGEF2	PRPF6	ADRM1	GMEB2	PDRG1	SERINC3	CDK5RAP1	DIDO1	LOC647979	SNHG11	COMMD7	EIF2S2	ACOT8	UQCC	TH1L
coad.tcga	POU5F1	POU5F1P4	POU5F1P3	SLC5A6	VAV3	EIF6	SRPX2	HM13	ACSL6	GTPBP5	GPSM2	ASXL1	POFUT1	ANO9	BOP1	AREG	MYC	KRT23	ADRM1	CDK5RAP1	KIAA0226L	TSPAN6	PIGU	ZMYND8	STK38	KCNK5	GGH	CARD14	AXIN2	C8orf33	EREG	PAH	YTHDF1	HEATR2	PLAGL2	UQCC	ASCL2	PTP4A3	DUS1L	TOP1MT	GTF2IRD1	SLC19A3	RNF114	ARFGEF1	AURKA	TBRG4	KHDRBS3	TSEN54	POLR3E
ov.gse9891	null
ov.tcga	null
Top genes:	POU5F1P3:2	POU5F1:2	POU5F1P4:2	YTHDF1:2	PIGU:2	ASXL1:2	RNF114:2	EIF6:2	PLAGL2:2	ADRM1:2	CDK5RAP1:2	UQCC:2	HGFAC:1	APOA1:1	AHSG:1	AQP2:1	TM4SF5:1	PRODH2:1	PASD1:1	APOA2:1
35	ID128	3	0.214311
brca.gse2034	null
brca.tcga	TCEAL6	TCEAL3	TCEAL5	TCEAL1	TCEAL4	MORF4L2	GATA3	SYTL4	XBP1	TBC1D9	ANKRA2	IL6ST	FOXA1	MLPH	ACADSB	THSD4	P4HTM	MGC3771	TSC22D3	C4orf34	BBS1	RUNDC1	ESR1	BBS4	HNRNPH2	MAGED2	GPR160	FBP1	FAM161B	INPP5J	DYNLRB2	CYB5D2	CACNA2D2	HHAT	REEP5	AGR3	SLC22A5	SALL2	C5orf30	PJA2	CCDC170	ZFYVE16	SLC7A8	FAM174A	TSPAN13	RERG	WWP1	ANXA9	CGRRF1
coad.gse14333	null
coad.tcga	TCEAL3	TCEAL6	TCEAL5	TCEAL4	PTPRM	ARMCX2	A2M	ZBTB4	COL16A1	SLC24A3	MAP6	ENOX1	MPDZ	GLIS3	CHST14	JAM3	SLC16A2	COL18A1	ITGB5	C1S	RASGRP2	GPRASP1	DAAM2	SLC39A13	PJA1	MAGED1	PODN	SERTAD4	RUNX1T1	SOD3	NR2F2	MFAP4	FBLN5	FILIP1L	VIM	GPR124	TSHZ3	GNAI2	HIC1	LTBP2	KCTD11	HDAC7	LAMA4	SETBP1	TCF4	CHST3	TCEA2	SGIP1	OAZ2
ov.gse9891	ZRANB1	C10orf88	FAM175B	C10orf137	METTL10	CTBP2	BCCIP	UROS	DHX32	BUB3	PPP2R2D	MGC70870	WDR11	GLRX3	PSTK	FAM204A	TIAL1	SEC23IP	ACADSB	XPNPEP1	NSMCE4A	IKZF5	ADO	MCMBP	PLEKHA1	DCLRE1A	RAB11FIP2	SMNDC1	MGMT	OAT	NRBF2	EIF3A	MARCH7	INPP5A	BAZ2B	RTKN2	DOCK1	FAM53B	FAM160B1	WDSUB1	CHUK	RNPEP	FAM178A	LOC100507006	SLC38A9	ZDHHC6	IL31RA	POLR3A	PLA2R1
ov.tcga	null
Top genes:	TCEAL6:2	TCEAL3:2	TCEAL5:2	TCEAL4:2	ACADSB:2	TCEAL1:1	MORF4L2:1	GATA3:1	SYTL4:1	XBP1:1	TBC1D9:1	ANKRA2:1	IL6ST:1	FOXA1:1	MLPH:1	THSD4:1	P4HTM:1	MGC3771:1	TSC22D3:1	C4orf34:1
36	ID120	3	0.212996
brca.gse2034	null
brca.tcga	HIST1H4L	HIST1H4C	HIST1H4D	HIST1H4B	FAM111B	CBX1	HIST1H1B	CCDC75	RIF1	SRRM1	SET	OTX1	GAS2L3	SCLT1	MTF1	LIMS1	ASPM	AHCTF1	FAM98A	UTP20	KDM4A	SRSF4	CASC5	RAD23A	DLGAP4	FAM161A	STX6	PRKCI	FOXN2	MKI67	CCDC137	CRCP	CEP152	NBPF20	ERC1	CENPO	KIF14	MTPN	ATAD5	HDGF	ANKRD36	CBX5	C12orf51	HIST1H1A	HMGB1P1	DIAPH3	GIGYF2	BRWD3	SLC25A36
coad.gse14333	null
coad.tcga	HIST1H4C	HIST1H4L	HIST1H4D	HIST1H4B	HIST1H4E	CKS2	AMD1	COQ7	HIST1H2BN	SCLT1	HIST1H3B	ANKRD39	C5orf24	FOXN2	MRPL21	PIF1	BCL2L12	AGGF1	CENPN	CCDC137	SNRPC	GMNN	HIST1H1B	HIST2H2AB	COX7A2	H2AFX	ZC3H18	FAM98A	CENPW	CDKN3	KIAA0101	OIP5	PSMA4	KIAA1524	HMGA1	PSMA6	SSR1	SLC25A3	TUBA1B	RBM18	CSTF3	PKN2	FANCM	CEP78	LIN9	HIST1H1A	COQ3	TRAIP	RPA3
ov.gse9891	DPH2	PPIH	EBNA1BP2	KDM4A	MED8	YBX1	UTP11L	DMAP1	C1orf50	GNL2	PPCS	MYCBP	PPIE	ATP6V0B	EIF2B3	ZNF691	C1orf109	ERI3	SNIP1	ELOVL1	NFYC	YRDC	ZMPSTE24	TOE1	NSUN4	MEAF6	IPO13	B4GALT2	SZT2	GPBP1L1	PTPRF	ADPRHL2	CTPS1	NDUFS5	ZNF643	TRIT1	MTF1	AKIRIN1	ZNF684	CCDC23	RLF	SF3A3	PABPC4	FOXJ3	C1orf122	CDC20	TMEM69	RRAGC	DEM1
ov.tcga	null
Top genes:	HIST1H4L:2	HIST1H4C:2	HIST1H4D:2	HIST1H4B:2	HIST1H1B:2	SCLT1:2	MTF1:2	FAM98A:2	KDM4A:2	FOXN2:2	CCDC137:2	HIST1H1A:2	FAM111B:1	CBX1:1	CCDC75:1	RIF1:1	SRRM1:1	SET:1	OTX1:1	GAS2L3:1
37	ID153	3	0.194711
brca.gse2034	null
brca.tcga	PCDHB11	PCDHB15	PCDHB9	PCDHB10	PCDHB3	PCDHB7	PCDHB13	PCDHB14	PCDHB8	PCDHB2	PCDHB12	JRKL	PCDHB16	PCDHGA3	FAM171A1	PLEKHG1	PCDHGB2	NXN	EGFR	FOXC1	MRAS	STOX2	ZNF454	PCDHB6	MAML2	SH3PXD2B	MYO10	MAP4K4	RHCG	ZNF532	ID4	GPM6B	PCDHB17	PLS3	PCDHGB1	DSC2	CSRP2	STON1	KALRN	ROR1	FOXL1	MTMR2	OLFM2	CALD1	RSU1	LPHN2	PRICKLE1	FSCN1	NMT2
coad.gse14333	null
coad.tcga	PCDHB14	PCDHB11	PCDHB15	PCDHB10	PCDHB9	HHAT	ZNF641	TCEAL8	PRPF18	PRKAR1A	NET1	GBE1	PPP3CA	PARP3	PJA1	ARSK	TIMP1	SEPT6	TNFSF4	LOXL1	TGFA	KLHL9	UBE2Q2	SENP7	TAMM41	CYP24A1	GLT25D2	RCN1	SLC45A3	L3MBTL3	TK2	IL17RD	CCNG2	NAP1L5	FRMD4B	HIF1A	ETV1	CSRNP2	PDCD1	BTG1	PHLDA1	PF4V1	PCDHB7	BMI1	RASSF3	WBP5	SPRY4	SPRY1	RBMS2
ov.gse9891	PCDHB11	PCDHB12	PCDHB18	PCDHB13	PCDHB6	PCDHB10	PCDHGA3	PCDHB14	PCDHB8	PCDHB4	PCDHB7	RBBP9	PCDHGA1	PCDHB2	PCDHB16	PCDHB3	C17orf80	PCDHGC3	PRR3	CANT1	PCDHB5	PCDHA9	PCDHB15	NREP	PCDHGA10	SULT1C4	ATF6B	DCAF7	PCDHA5	NFYA	TEAD2	ZNF192	PGAM2	FIGN	ACTG1	ATF2	PCDHB9	HNRNPA0	TAF7	TMEM132A	MFAP3	TMEM230	LOC728485	MED20	SENP2	MAP2K6	ATXN7L3B	PCDHA3	SLC38A10
ov.tcga	null
Top genes:	PCDHB11:3	PCDHB15:3	PCDHB9:3	PCDHB10:3	PCDHB7:3	PCDHB14:3	PCDHB3:2	PCDHB13:2	PCDHB8:2	PCDHB2:2	PCDHB12:2	PCDHB16:2	PCDHGA3:2	PCDHB6:2	JRKL:1	FAM171A1:1	PLEKHG1:1	PCDHGB2:1	NXN:1	EGFR:1
38	ID4	3	0.19447
brca.gse2034	null
brca.tcga	MAGEA12	MAGEA3	MAGEA5	CSAG1	MAGEA4	CSAG3	MAGEA1	MAGEA10	PAGE2	GTSF1	COX7B2	PAGE5	VCX2	F2	AHSG	VCX3A	MKRN3	APOC3	PAGE2B	APOA2	MAGEC2	PIR	HBE1	SSX7	CTAG2	APOA1	LGSN	TM4SF5	PLK1	MAGEA9	SNRPA1	SSX1	ITGB7	FABP1	MAGEA8	HBZ	MGC72080	CCNA2	GDF3	HBG1	SLC7A5	PASD1	PRODH2	PMEL	C12orf56	RHAG	ALG3	DCT	CENPN
coad.gse14333	TMEM151A	CNIH2	PLEKHH3	GP9	GSG1L	DEFB124	IPO13	GPR31	DNM1P41	SLC38A3	PLEKHG5	TRMT2A	FAM110D	BAZ2A	LOC100506997	C9orf37	FOXC2	AVP	VPS33A	LOC100128071	LOC144486	HMGA1P4	C6orf221	FAM212A	LOC100652861	SH3GL1P2	HSD17B14	DKKL1	LHX5	SLC7A4	AMIGO3	ADM2	PMEL	ZNF574	ZNF341	SLC35F3	SIRT2	ZDHHC19	SNAPC2	NEK8	FICD	FAM163A	NDOR1	SLC12A9	PPY2	RASAL3	SNTA1	SLC6A3	SARDH
coad.tcga	MAGEA12	MAGEA3	MAGEA1	MAGEA5	MAGEA4	CSAG3	CSAG1	NAIF1	GTSF1	PRAME	HTR2C	HBE1	ITIH3	APOC3	FGG	NXF5	MAGEA9	MKRN3	HBG1	MAGEA8	AFP	MAGEA10	ZDHHC8	TF	MAL	APOA1	APOA2	GDF3	IGDCC3	SLC34A3	AHSG	DPPA4	DLK1	AMBP	RHOXF2B	HBZ	TRIML2	SPANXD	PMEL	ITIH2	ALAS2	ITGB7	SLCO1A2	GATA3	WAS	MAGEC2	SLC5A12	DCT	MYL4
ov.gse9891	null
ov.tcga	null
Top genes:	PMEL:3	MAGEA12:2	MAGEA3:2	MAGEA5:2	CSAG1:2	MAGEA4:2	CSAG3:2	MAGEA1:2	MAGEA10:2	GTSF1:2	AHSG:2	MKRN3:2	APOC3:2	APOA2:2	MAGEC2:2	HBE1:2	APOA1:2	MAGEA9:2	ITGB7:2	MAGEA8:2
39	ID43	3	0.173747
brca.gse2034	null
brca.tcga	SCGB1D2	SCGB2A2	SCGB1D1	SCGB2A1	SPDEF	TFF3	MLPH	AGR3	AR	AGR2	ABCC8	ABCC11	SLC7A8	FOXA1	SCNN1A	XBP1	PIP	PRR15	HPX	CXXC5	C1orf64	DYNLRB2	TGFB3	LRRC17	CA12	FAM214A	REEP6	SLC44A4	TSC22D3	TSPAN1	PTPRT	TBC1D9	HMGCS2	TOX3	BPIFB1	CAPN13	THSD4	C4orf34	SCUBE2	ZNF552	LRFN2	ERBB4	ESR1	C10orf116	PRICKLE2	GALNT10	MARC2	MSX2	CYP4Z1
coad.gse14333	null
coad.tcga	CYP4F2	CYP4F8	CYP4F12	CYP4F11	SMPD3	CES2	PDZD3	CLCN2	SPATA2	DOK4	ACOT11	DHRS11	GTF2IRD1	CDHR2	EPS8L3	TJP3	VIPR1	MYOM3	MGAT4B	PRAP1	MOGAT3	IL22RA1	NR1I2	ACSS2	SLC26A3	SOWAHA	TCF7	SIRT6	ACSL5	HNF4A	TM9SF4	PBLD	SGK2	CDHR5	PPP1R14D	GNA11	CHP2	AZGP1	RAB22A	AIFM3	ZNF514	MLYCD	INPP5J	STK38	PARP4	PTK6	IQCE	PRR15	C3orf32
ov.gse9891	DKK4	NOTUM	NKD1	FGF20	RASGRF1	MSX2	AXIN2	TSPAN11	EDN3	ADAMTS19	GAD1	DYNC1I1	GFRA3	GREM2	ERVMER34-1	SP5	ADAMTSL2	PCCA	LINC00261	ABHD12B	SHISA6	MUCL1	HABP4	GALNTL1	DBH	DLX5	PROX1	KREMEN1	FGF19	APCDD1	AFF3	SLC18A2	SCML1	WIF1	SLC47A1	EDAR	GPCPD1	RASL11B	IHH	ZDHHC9	EPHA7	C9orf152	RNF43	BMP4	CHPF	C1orf64	PMCH	ODAM	CHGB
ov.tcga	null
Top genes:	PRR15:2	C1orf64:2	MSX2:2	SCGB1D2:1	SCGB2A2:1	SCGB1D1:1	SCGB2A1:1	SPDEF:1	TFF3:1	MLPH:1	AGR3:1	AR:1	AGR2:1	ABCC8:1	ABCC11:1	SLC7A8:1	FOXA1:1	SCNN1A:1	XBP1:1	PIP:1
40	ID83	3	0.152476
brca.gse2034	null
brca.tcga	GSTA2	GSTA5	GSTA3	SOX10	VGLL1	SLC6A14	TTYH1	ROPN1	LEMD1	SOSTDC1	FOXC1	ROPN1B	MIA	MET	PPP1R14C	SRSF12	FOXL1	LY6D	SFRP1	KLK6	UGT8	CDH3	FABP7	B3GNT5	CHRM2	PSAT1	ART3	FGFBP1	STAC	BCL11A	CHST4	NPM2	KRT81	FOLR1	FZD9	FERMT1	GPRC5B	PLCH1	IL34	KRT16P3	FAM171A1	KLK5	ELF5	ITM2C	MAPK4	BPI	GABRP	SHC4	SLC34A2
coad.gse14333	null
coad.tcga	HOXD11	HOXD10	HOXD9	HOXD13	ARMC2	RTKN	SALL4	CAB39L	KLHL23	HOXD8	CEL	USP11	MYL6B	GLDC	DNMT3A	C10orf47	ROBO2	LPA	CELF3	ADAMTSL2	PMEPA1	LARP6	SCG3	WNT5B	ZNF362	CELP	CMAHP	SLCO1A2	MFAP2	NRXN3	FXYD2	CNGB3	HOXD3	FOXO3	ZNF503	SMTNL2	SUSD1	SOSTDC1	RECK	SPEG	DTX3	APOLD1	SCNN1B	MYLIP	PIWIL2	TRPM6	SOX4	MYL3	SLC38A11
ov.gse9891	PAPPA2	HOXA11-AS	LOC100130894	CGA	HOXD11	ADAM2	SFTA3	C2orf80	HOXA11	HDC	SLCO1C1	GATA3	IDO2	NKX2-1	LOC100506421	EDDM3B	HOXD10	EYA1	EDDM3A	UCP1	ZPLD1	FLJ45983	SCTR	UGT1A6	HOXA6	SPRR3	LAMB4	ACTN2	KCNK12	LIN7A	GAD2	RASSF6	HOXD13	MGC4473	LBX1	HOXA7	LHFPL5	IKZF3	SCUBE3	RIMS1	NPPC	ATP6V1G3	TAF13	VSIG1	LOC100130458	CUX2	MGAT4C	SGCZ	LINC00326
ov.tcga	null
Top genes:	SOSTDC1:2	HOXD11:2	HOXD10:2	HOXD13:2	GSTA2:1	GSTA5:1	GSTA3:1	SOX10:1	VGLL1:1	SLC6A14:1	TTYH1:1	ROPN1:1	LEMD1:1	FOXC1:1	ROPN1B:1	MIA:1	MET:1	PPP1R14C:1	SRSF12:1	FOXL1:1
41	ID145	3	0.133413
brca.gse2034	null
brca.tcga	ATP1A3	ATP1A4	ATP1A1	SUN2	ARHGEF2	AFG3L2	PHC2	YARS	EIF4G1	LIMK2	PPP4R1	CSDE1	TINAGL1	UBL4A	PICK1	PTPRF	JOSD1	NCK2	MLXIP	MICALL1	CARS	RXRB	WASF2	BCR	PTGFRN	HTRA2	PEX5	DTNB	DBNL	EPHB4	ATG13	AMPD2	AP2M1	MYD88	ELK1	DAP	SLC12A8	MAP4	MANSC1	AP1B1	SNX17	DDOST	MKL1	TMEM214	TNPO3	UBE2J2	UBAC2	ARHGEF19	MAPKAP1
coad.gse14333	null
coad.tcga	ATP1A3	ATP1A4	ATP1A1	TSC2	ZNF768	CARD10	LIMK2	ASCC2	TMED9	HDGFRP2	NOTCH1	AP1B1	ZNF598	GAK	AXIN1	SUN2	GORASP1	USP19	KIAA1244	EEF2	CSNK1E	ADCY6	SH3BP4	EIF4G1	HNRNPAB	H6PD	MGRN1	HNRNPA0	GBA2	CAMSAP3	TBC1D9B	ARHGAP35	ZFYVE9	PLXNB1	TNPO3	BCR	WASF2	SBF1	EPB41L2	ARHGEF10L	TMEM63A	RHPN2	NFATC3	PDHA1	VPS13D	SURF6	SSBP3	CUEDC1	HCFC1
ov.gse9891	MAPK1	UFD1L	UBE2L3	PI4KA	ATP6V1E1	TOP3B	TFIP11	SRRD	C22orf25	C22orf13	SNRPD3	PPIL2	BCL2L13	AP1B1	SDF2L1	PITPNB	KLHL22	C22orf39	DGCR14	SPECC1L	THAP7	TCN2	CCDC117	LZTR1	CRKL	MTMR3	CABIN1	YWHAH	DDT	SF3A1	THOC5	MRPL40	NDST2	EWSR1	MED15	A2M	DRG1	UQCR10	PPM1F	PES1	RNF185	SNAP29	LOC284578	TRMT2A	GPR88	DGCR2	C22orf28	CLDN5	GAS2L1
ov.tcga	null
Top genes:	AP1B1:3	ATP1A3:2	ATP1A4:2	ATP1A1:2	SUN2:2	EIF4G1:2	LIMK2:2	WASF2:2	BCR:2	TNPO3:2	ASCC2:2	ARHGEF2:1	AFG3L2:1	PHC2:1	YARS:1	PPP4R1:1	CSDE1:1	TINAGL1:1	UBL4A:1	PICK1:1
42	ID141	3	0.124164
brca.gse2034	null
brca.tcga	GGTLC2	GGT1	GGTLC1	FAM211B	TRPV6	QPRT	FGFR4	SLC25A1	IDH2	DNASE1	KMO	C1orf106	C22orf13	RHBDD3	MIF	SNRPD3	LAD1	DERL1	PLXNB3	C12orf28	SLC52A2	MVD	CES3	EPO	SLC25A18	MPHOSPH6	PLCH1	TMSB10	DBNDD1	GPR126	SLC25A10	GUK1	FADS2	G6PD	SPAG4	MICAL3	ERBB2	SGSM3	MFSD2A	NDUFA6	UBE2L3	MIEN1	GJB1	PYCR1	GRB7	CDC42EP1	SREBF2	MMP15	ORMDL3
coad.gse14333	null
coad.tcga	GGT1	GGTLC1	GGTLC2	FAM211B	ID1	ACOT11	PLA2G4F	GPD1	SELENBP1	GLCE	SMAD7	SMAD6	ID3	GRAMD2	DUOX2	SLC5A9	FAM132A	SMPD1	AGT	DNM3	STX3	TBX10	RABEP2	ABCC2	DOK4	PROM2	RPS19BP1	CDHR2	SHROOM1	ACOX2	KNG1	ASCC2	BTNL3	RORC	TTC38	PAQR8	MYO15B	CAPN13	GPR20	VSIG2	DENND2A	FHOD3	SMPD3	PCSK6	ITLN2	SLC26A3	NCKAP5	LRP1	CALML4
ov.gse9891	TFIP11	SRRD	PITPNB	C22orf13	C22orf28	MAPK1	THOC5	SPECC1L	SNRPD3	ATP6V1E1	RNF185	PI4KA	PRR14L	UFD1L	DRG1	PES1	SF3A1	CABIN1	ASCC2	UBE2L3	CCDC117	AP1B1	HPS4	TOP3B	LZTR1	NIPSNAP1	FBXO7	UQCR10	PPIL2	DGCR14	HSCB	THAP7	MTMR3	DDT	NDST2	RHBDD3	SDF2L1	TUG1	EIF4ENIF1	C22orf39	EWSR1	ASPHD2	LOC100507599	TCN2	KLHL22	MRPL40	C22orf25	SEC24C	BCL2L13
ov.tcga	null
Top genes:	GGTLC2:2	GGT1:2	GGTLC1:2	FAM211B:2	C22orf13:2	RHBDD3:2	SNRPD3:2	UBE2L3:2	DGCR14:2	ASCC2:2	TRPV6:1	QPRT:1	FGFR4:1	SLC25A1:1	IDH2:1	DNASE1:1	KMO:1	C1orf106:1	MIF:1	LAD1:1
43	ID30	3	0.100358
brca.gse2034	null
brca.tcga	CST1	CST2	CST4	LAMP5	HTRA3	GRP	CST5	TNN	OMD	SIGLEC8	F2RL2	MLPH	FOXA1	SIDT1	LRRC17	LRRC32	SFRP2	FAM26E	CHRNA6	TGFB3	GAS7	XBP1	PPEF1	CBLN4	GAPT	DKK3	AXL	ECM2	TSPAN1	NOX4	ITGBL1	F2R	TFF3	MAN2B2	IGFBP7	NAT1	OLFML3	HTRA1	DPEP1	NTM	THSD4	FAP	CTSK	HPGDS	COL8A2	FBN1	LRFN2	SCNN1A	CAPN13
coad.gse14333	null
coad.tcga	CST1	CST2	CST4	GRP	GPBAR1	ELN	GLI1	LMOD1	PLN	FXYD6	PLA2G5	ADAMTSL3	MMP11	OLFML1	COL8A2	C1QTNF7	APOD	SFRP4	WNT2	TNFSF4	MGP	LAYN	HSD17B6	CORIN	SERPING1	LY6G5C	HMCN1	FAM176B	MATN3	ITGBL1	MFAP5	MAP6	GUCY1A3	SGCA	YPEL5	SPSB1	DIO2	ALDH1A3	CCL21	HPGDS	PDE1A	STON1	HIGD1B	FNDC1	LAMP5	LMO3	ZNF688	CRYAB	KCNK13
ov.gse9891	THBS2	FAP	VCAN	COL5A2	INHBA	COL5A1	FBN1	COL3A1	COL11A1	FN1	PRRX1	COL10A1	CTSK	COL1A1	COL1A2	SPARC	AEBP1	SERPINF1	CRISPLD2	LUM	ADAM12	POSTN	CCDC80	LOX	CTHRC1	LRRC15	TNFAIP6	RAB31	COPZ2	SNAI2	SFRP2	PMP22	ANTXR1	ALPK2	TMEM158	MMP2	PRKG1	ACTA2	OLFML2B	VGLL3	WISP1	PLAU	EPYC	GREM1	GJB2	MMP11	ASPN	ADAMTS2	NUAK1
ov.tcga	null
Top genes:	CST1:2	CST2:2	CST4:2	LAMP5:2	GRP:2	SFRP2:2	ITGBL1:2	FAP:2	CTSK:2	HPGDS:2	COL8A2:2	FBN1:2	MMP11:2	HTRA3:1	CST5:1	TNN:1	OMD:1	SIGLEC8:1	F2RL2:1	MLPH:1
44	ID147	3	0.090555
brca.gse2034	null
brca.tcga	UGT2B28	UGT2B11	UGT2B10	UGT2B7	UGT2B17	UGT2B15	UGT2B4	LRRC31	IQGAP2	ABCC11	GNMT	ATP13A4	SERHL2	SERHL	TP53INP2	FCN2	DUSP4	NUDT8	GNA14	ABCC12	DUSP6	GLYATL1	MSX2	C1orf115	ENPP3	TMEM86A	SEMA3E	AR	AZGP1	ARL15	ENTPD7	SCGB2A2	NDNF	GALNT7	TMC5	AQP3	TC2N	SLC25A16	UGT2A3	VIPR2	CRAT	IGSF21	DNASE2B	SLC26A3	PIP	LIMCH1	GPRC5C	CEACAM6	CRYM
coad.gse14333	null
coad.tcga	UGT2B7	UGT2B28	UGT2B10	UGT2B11	AKAP7	TTR	FAM198B	NEURL	PHEX	SNCAIP	UGT2B4	TOX	CALCB	NDUFV2	NPAS3	ROBO2	IDH1	NOL4	TTTY13	KITLG	NFYA	ZBTB1	TMEM205	GSTA4	ALDH1A1	UNC5CL	OSR2	UGT2A3	ADH5	KLK12	C15orf27	HYAL2	ARRDC2	CDS1	LACTB2	MFSD3	PEX6	BAMBI	LGALS2	SYT16	PON2	ABCG2	FBXO22	CACNA2D2	SLC18A1	HIP1R	RHOBTB3	SYTL1	CABLES1
ov.gse9891	UGT2B4	TNP1	ACMSD	WNT16	CSN1S1	LOC100505725	AMDHD1	CLDN2	LOC284561	ATP6V1G3	C9orf71	IL23R	SEMA3D	CYP2B6	BMP5	KLK2	INHBE	PRND	FGF8	MATN1	C3orf36	KLK1	GPX5	MGC4473	BDNF-AS	KLK4	LOC100507511	TRH	SMR3B	CRYGN	GFRA3	PNMT	PLD5	PRMT8	IHH	ABHD12B	METTL6	TNFSF8	DDX53	SYT16	LOC100507008	CSMD3	TWIST2	LINC00261	PDE2A	ITIH2	CABP7	HMGCLL1	ADCY1
ov.tcga	null
Top genes:	UGT2B4:3	UGT2B28:2	UGT2B11:2	UGT2B10:2	UGT2B7:2	UGT2A3:2	SYT16:2	UGT2B17:1	UGT2B15:1	LRRC31:1	IQGAP2:1	ABCC11:1	GNMT:1	ATP13A4:1	SERHL2:1	SERHL:1	TP53INP2:1	FCN2:1	DUSP4:1	NUDT8:1
45	ID35	3	0.0705627
brca.gse2034	null
brca.tcga	RFPL2	RFPL1	RFPL3	EXD1	TRIM46	ABHD6	PABPC1L2B	MBL2	CRYGD	SNCAIP	SYNJ1	SLC25A31	PFKFB4	CRHR2	CHD5	CPNE4	NAPB	USH1C	OR12D3	GPR115	PANX3	LINC00319	PPIA	ACTL6B	BTBD16	H2AFV	PCTP	TOX	MARCH4	GABRA2	LOC283693	F9	CACNA1G	VGF	LHFPL5	UBE2D4	FOPNL	SLC5A5	SLC6A13	C14orf178	SHD	DNASE1L3	SYP	CPT1C	GRM7	MEGF11	GHRHR	RNF43	OR6B1
coad.gse14333	null
coad.tcga	MUC13	TMPRSS2	CLRN3	TSPAN8	PIP5K1B	SLC18A3	USH1C	GPX2	FAM3D	CDH17	NEU2	PROKR2	HSD11B2	FAM211A	ATP2C2	GATA6	FUT3	TOX3	KCNA3	GALNTL5	TRIM15	TTLL2	ALDH2	GUCY2C	TRIM60	PRR15L	CEACAM5	IHH	SLC22A23	SGPP2	OR56A3	CDX2	BEND3	FAM171A1	LNX2	FOXA2	SEL1L3	IYD	OR2A2	MYB	REXO1L1	SLC5A1	RNF186	CFTR	ADAMTS20	NUAK2	BCL9	MMP15	BAIAP2L2
ov.gse9891	GUCY2C	A1CF	MUC13	EPS8L3	MUC17	TRIM31	SLC26A3	SLC17A4	MEP1A	CYP2C9	CDH17	RNF186	SULT1B1	CLRN3	VIL1	FLJ22763	ALDOB	LGALS4	SLC39A5	HNF4A	IYD	FABP1	MYO1A	KRT20	LRRC66	MUC12	HNF4G	TAC3	GPA33	TM4SF5	LINC00483	ANKS4B	ISX	TINAG	SI	USH1C	TTR	SPINK1	ARL14	CYP2C19	GPX2	TM4SF20	CLDN18	C4BPB	MUC3A	CDHR5	LOC100505989	APOBEC1	LINC00543
ov.tcga	null
Top genes:	USH1C:3	MUC13:2	CLRN3:2	GPX2:2	CDH17:2	GUCY2C:2	IYD:2	RNF186:2	RFPL2:1	RFPL1:1	RFPL3:1	EXD1:1	TRIM46:1	ABHD6:1	PABPC1L2B:1	MBL2:1	CRYGD:1	SNCAIP:1	SYNJ1:1	SLC25A31:1
46	ID41	2	0.536789
brca.gse2034	null
brca.tcga	null
coad.gse14333	KIAA1704	NUFIP1	MED4	GTF2F2	MRPS31	UBAC2	RNF219	KPNA3	UCHL3	IPO5	PROSER1	DIS3	INTS6	POMP	FAM48A	CUL4A	NAA16	ALG5	CDC16	SUGT1	NDFIP2	PIBF1	WBP4	UPF3A	BIVM	NEK3	RBM26	ELF1	CKAP2	SLC25A15	STK24	HMGB1	CENPJ	TGDS	SPRYD7	TMTC4	TUBGCP3	BORA	PCID2	EXOSC8	PARP4	UTP14C	EFHA1	ESD	KBTBD6	SETDB2	YWHAB	UGGT2	N4BP2L2
coad.tcga	CUL4A	TMTC4	CARKD	GTF2F2	CDC16	TM9SF2	PCID2	UTP14C	NEK3	TUBGCP3	NUFIP1	FAM48A	BIVM	IPO5	ERCC5	UPF3A	RBM26	RNF219	ATP11A	AKAP11	PDS5B	PARP4	MRPS31	KIAA1704	SAP18	UBL3	INTS6	ANKRD10	DIS3	GRTP1	STK24	UGGT2	COMMD6	TRIM13	RNF6	MED4	USPL1	CARS2	NAA16	SUGT1P3	PROSER1	DIDO1	PAN3	SPRYD7	SLC25A15	UFM1	ELF1	HSPH1	RNASEH2B
ov.gse9891	null
ov.tcga	null
Top genes:	KIAA1704:2	NUFIP1:2	MED4:2	GTF2F2:2	MRPS31:2	UBAC2:2	RNF219:2	IPO5:2	PROSER1:2	DIS3:2	INTS6:2	FAM48A:2	CUL4A:2	NAA16:2	CDC16:2	UPF3A:2	BIVM:2	NEK3:2	RBM26:2	ELF1:2
47	ID80	2	0.488788
brca.gse2034	null
brca.tcga	ZNF578	ZNF761	ZNF813	ZNF816	ZNF137P	ZNF468	ZNF600	ZNF665	ZNF160	ZNF28	ZNF525	ZNF83	ZNF320	ZNF611	ZNF347	ZNF17	ZNF765	ZNF701	ZNF432	ZNF615	ZNF614	ZNF154	ZNF530	ZNF417	ZNF211	ZNF766	ZNF304	ZNF134	ZNF350	ZNF702P	ZNF551	PRPF31	ZNF780A	ZNF548	ZNF99	ZNF586	ZNF547	ZNF543	ZNF264	ZNF283	ZNF473	ZNF419	ZNF225	ZNF613	ZNF571	ZNF416	VRK3	ZNF254	PPP1R12C
coad.gse14333	null
coad.tcga	null
ov.gse9891	ZNF45	ZNF227	ZNF222	ZFP112	ZNF230	ZNF180	ZNF226	ZNF225	ZNF234	ZNF223	ZNF224	ZNF235	ZNF283	ZNF285	XRCC1	LOC100505715	ZNF155	SMG9	ZNF229	IRGQ	ZNF233	ATP5SL	ZNF576	ZNF404	ZNF780A	MEGF8	CCDC97	HNRNPUL1	ERCC1	ZFP37	ZNF329	DEDD2	ZNF211	OPA3	RPS19	PHLDB3	LOC100379224	DHX40	ZNF568	EID2	ZNF260	ZNF526	TTC33	ZNF569	C12orf4	ZNF420	EID2B	KIFAP3	SNRPD2
ov.tcga	null
Top genes:	ZNF211:2	ZNF780A:2	ZNF283:2	ZNF225:2	ZNF578:1	ZNF761:1	ZNF813:1	ZNF816:1	ZNF137P:1	ZNF468:1	ZNF600:1	ZNF665:1	ZNF160:1	ZNF28:1	ZNF525:1	ZNF83:1	ZNF320:1	ZNF611:1	ZNF347:1	ZNF17:1
48	ID39	2	0.480873
brca.gse2034	null
brca.tcga	null
coad.gse14333	null
coad.tcga	TCF20	BRD1	UPF1	HPS4	HNRNPM	SPECC1L	CHERP	KHSRP	MICAL3	MORC2	TMEM184B	ZNF629	ZDHHC7	WIZ	NOTCH1	GOLGA3	GATAD2A	TNRC6B	SAFB	TCF3	ELAVL1	HCFC1	USP7	DGKD	SRRM2	TBC1D13	CRKL	HIC2	ZMIZ1	CTBP2	NUAK2	NCOR2	JHDM1D	LEMD2	LASP1	DDX42	TACC2	ARHGEF18	AXIN1	ARHGEF10L	SRRT	BCL11B	DEPDC5	HERC1	UBN1	ABR	SRF	CARD10	REPIN1
ov.gse9891	BAG6	CSNK2B	ABCF1	ZBTB9	EHMT2	RDBP	DHX16	LSM2	SNRPC	PPP1R11	VPS52	SKIV2L	DAXX	TRIM39	HCG18	PRRC2A	TAF11	ABT1	RXRB	AGPAT1	VARS	FKBPL	TUBB	TRIM27	CUTA	MDC1	DOM3Z	WDR46	GPANK1	RING1	ABHD16A	C6orf89	PFDN6	ZNRD1	MRPS18B	JARID2	ZKSCAN4	ZNF322	BRD2	XPO5	BRPF3	ATAT1	C6orf106	LEMD2	NUP153	PBX2	ANKS1A	PRR3	RGL2
ov.tcga	null
Top genes:	LEMD2:2	TCF20:1	BRD1:1	UPF1:1	HPS4:1	HNRNPM:1	SPECC1L:1	CHERP:1	KHSRP:1	MICAL3:1	MORC2:1	TMEM184B:1	ZNF629:1	ZDHHC7:1	WIZ:1	NOTCH1:1	GOLGA3:1	GATAD2A:1	TNRC6B:1	SAFB:1
49	ID78	2	0.458527
brca.gse2034	null
brca.tcga	ZNF442	ZNF823	ZNF799	ZNF625	ZNF443	ZNF700	ZNF20	ZNF709	ZNF564	ZNF441	ZNF791	ZNF44	ZNF675	ZNF678	ZNF85	ZNF433	ZNF43	ZNF479	ZNF117	ZNF826P	ZNF99	ZNF681	ZNF763	ZNF254	ZNF676	ZNF430	ZNF429	ZNF208	ZNF627	ZNF136	ZNF680	ZNF253	ZNF91	ZNF141	ZNF100	ZNF107	ZNF563	ZNF708	ZNF92	ZNF486	APPL2	ZNF431	ZFYVE16	WDR83OS	NR2E3	ZNF595	KIAA1279	EPB41L5	RALGAPA1
coad.gse14333	null
coad.tcga	null
ov.gse9891	OTUD5	TIMM17B	SUV39H1	HDAC6	GRIPAP1	TBC1D25	SLC35A2	PQBP1	TFE3	CCDC22	GPKOW	PRICKLE3	WDR45	EBP	FTSJ1	WDR13	PRAF2	ARAF	GLOD5	KCND1	NDUFB11	CCDC120	C1QTNF9	LOC158572	USP27X	LOC401588	ELSPBP1	CDK16	UBA1	MAGIX	ZNF81	CACNA1F	ZNF182	UXT	PORCN	LOC100506502	ZNF430	LOC285084	HUWE1	ZNF41	CLCN5	MAGED1	TSR2	PIM2	COL24A1	LOC100507525	ZNF91	RP2	APEX2
ov.tcga	null
Top genes:	ZNF430:2	ZNF91:2	ZNF442:1	ZNF823:1	ZNF799:1	ZNF625:1	ZNF443:1	ZNF700:1	ZNF20:1	ZNF709:1	ZNF564:1	ZNF441:1	ZNF791:1	ZNF44:1	ZNF675:1	ZNF678:1	ZNF85:1	ZNF433:1	ZNF43:1	ZNF479:1
50	ID49	2	0.404681
brca.gse2034	null
brca.tcga	null
coad.gse14333	null
coad.tcga	DNAH3	ULBP1	HECW1	PPFIA2	RAB19	CCDC60	MSTN	OR13G1	ATP1B4	CNBD1	SLC10A6	GNRHR	ANKS1B	LEFTY2	OR52E2	USH2A	DRD2	CATSPERD	OR4S2	RSPH10B	ZIM3	DCDC5	TMIE	FHL5	TMEM202	TRHR	TEX13A	OR10G3	SNX31	RFPL2	OR9I1	GLIPR1L1	CXorf22	ABCA9	SP7	C18orf26	NTNG1	GAPDHS	EDA2R	WNT16	TBX5	CFHR2	OR10T2	OR5B17	BNC1	POU1F1	DNAH5	L3MBTL4	RTP1
ov.gse9891	KLK3	LOC100507274	HS3ST4	ZNF831	MYH7B	SEZ6L	MAB21L3	SLC6A2	NODAL	OR7A5	DEFA5	SLC22A11	BEST3	NMUR2	HEPACAM2	PIRT	SHISA6	WNT16	NRSN1	ABHD12B	PROX1	GPX5	LOC100129662	ADAMTSL2	SYT6	PSORS1C2	KLK1	SOX14	KRT31	FIBCD1	CEACAM21	ABCC2	GFRA3	KLK4	RPTN	TMPRSS11E	ICK	SERPINA12	LOC100132354	PRMT8	OSBPL6	FSTL4	CDX2	HMP19	LOC100129463	ANKRD34C	HABP4	SLC24A4	LY6H
ov.tcga	null
Top genes:	WNT16:2	DNAH3:1	ULBP1:1	HECW1:1	PPFIA2:1	RAB19:1	CCDC60:1	MSTN:1	OR13G1:1	ATP1B4:1	CNBD1:1	SLC10A6:1	GNRHR:1	ANKS1B:1	LEFTY2:1	OR52E2:1	USH2A:1	DRD2:1	CATSPERD:1	OR4S2:1
51	ID155	2	0.242361
brca.gse2034	null
brca.tcga	HOXA5	HOXA7	HOXA3	HOXA9	HOXA4	HOXA2	HOXA10	RBMS3	RUNX1T1	FLRT2	GLI2	JAM3	CAV1	SLIT2	LIMS2	TSHZ2	RHOJ	PTRF	MEIS2	COL14A1	SCN4B	CCDC8	PROS1	BOC	GNG11	SPRY2	SKAP2	MFAP4	NDN	SMAD9	CCDC80	SCN2B	LINC00478	EFHA2	NGFR	TCF4	CRYAB	TSLP	CNRIP1	JAM2	LHFP	SVEP1	AQP1	PTN	FNDC4	ID4	ANKRD35	GRASP	FXYD6
coad.gse14333	null
coad.tcga	null
ov.gse9891	HOXA5	HOXA3	HOTAIRM1	HOXA4	SKAP2	HOXA1	HOXA2	HOXA-AS2	CRISPLD2	HOXA7	ASPN	HOXA10	CCDC80	SVEP1	ALPK2	BCHE	FAP	NUAK1	FABP4	SFRP2	RUNX1-IT1	DOCK11	ADAM12	GREM1	HSD17B6	LUM	PRRX1	MOXD1	THBS2	PTGER3	LOX	COL5A2	INHBA	COPZ2	FN1	ADH1B	COL11A1	COL3A1	ADIPOQ	C13orf33	CD36	C3orf80	POSTN	EPYC	SLC35D3	ISL1	CXCL14	PRKG1	SLC12A8
ov.tcga	null
Top genes:	HOXA5:2	HOXA7:2	HOXA3:2	HOXA4:2	HOXA2:2	HOXA10:2	SKAP2:2	CCDC80:2	SVEP1:2	HOXA9:1	RBMS3:1	RUNX1T1:1	FLRT2:1	GLI2:1	JAM3:1	CAV1:1	SLIT2:1	LIMS2:1	TSHZ2:1	RHOJ:1
52	ID87	2	0.232745
brca.gse2034	null
brca.tcga	null
coad.gse14333	null
coad.tcga	KRT18	KRT18P55	KRT8	KRT8P12	KRT8P41	DDX54	GPRC5A	GOLGA3	FAM129B	WWC1	KRT83	ACTN4	RAB35	CLIP1	DDX3X	KIAA0930	BPIFC	PRPF31	TPM4	TAOK3	NF2	MAX	PTPN11	MYOF	RNF10	GAS8	C2orf18	AHNAK	EPHA2	ALAS1	ARF3	SCG2	DDX42	RALBP1	GCN1L1	RAB21	MOV10	BRAP	SPTBN1	FOXD4L2	PITPNA	C12orf44	MAD1L1	ABLIM3	EMP1	OS9	USP43	VCL	TLE3
ov.gse9891	MED29	PAF1	SUPT5H	EID2	TIMM50	PAK4	PSMC4	EID2B	SAMD4B	RPS16	PLEKHG2	ZNF780A	DYRK1B	SARS2	FBXO27	DLL3	FBL	PSMD8	SHKBP1	ECH1	ZNF780B	ZNF546	AKT2	ZNF607	MRPS12	ZNF260	ACTN4	EIF3K	GPATCH1	SPINT2	HKR1	C19orf54	POLR2I	ZNF569	ZNF568	YIF1B	LIN37	ZNF570	ZNF585A	ZNF383	SF3A1	SERTAD1	ZNF829	TBCB	ZFP30	LGALS14	SIRT2	ZFP82	ZNF571
ov.tcga	null
Top genes:	ACTN4:2	KRT18:1	KRT18P55:1	KRT8:1	KRT8P12:1	KRT8P41:1	DDX54:1	GPRC5A:1	GOLGA3:1	FAM129B:1	WWC1:1	KRT83:1	RAB35:1	CLIP1:1	DDX3X:1	KIAA0930:1	BPIFC:1	PRPF31:1	TPM4:1	TAOK3:1
53	ID14	2	0.183459
brca.gse2034	null
brca.tcga	SSX5	SSX3	SSX2	SSX7	SSX1	SSX9	DMRTB1	FMR1NB	PAGE1	CTAG2	PAGE2	PAGE5	VCX3A	SLCO1B1	MAGEB2	PPP1R2P9	PAGE2B	VCX2	MAEL	OR8G2	MAGEC1	MAGEC2	MAGEA8	LINC00470	DCAF4L2	FSTL5	LOC441601	CNTNAP4	MAGEA5	MAGEB6	KNG1	DNAJB3	DSCR4	SPACA3	MAGEA11	MAGEA12	LINC00305	NYAP2	TTTY13	MAGEA10	XAGE3	COX7B2	SLC2A2	DHFRL1	GTSF1	SULT2A1	PRDM7	C12orf61	ALPP
coad.gse14333	null
coad.tcga	GYPB	MRGPRX3	MS4A3	APOA5	GLRA3	GYPE	ACSM2B	TSPY2	ERBB4	C16orf73	PLEKHG4B	SLC2A2	LOC441601	NETO1	FOXE1	CSMD1	C8A	C8orf22	LRAT	AGXT2L1	INHA	CDH12	C1orf114	NPPB	CYP11A1	ST8SIA3	RND2	MBL2	MPP2	SLC6A15	TCERG1L	KIAA0825	SH3GL3	ZIC3	GFI1B	ESX1	TRIM49	DDX25	CNTNAP4	SLC1A6	SOX21	ACSM2A	HMGCLL1	CORO2B	RGAG1	SLC45A2	MAG	CRABP1	EPHA5
ov.gse9891	null
ov.tcga	null
Top genes:	LOC441601:2	CNTNAP4:2	SLC2A2:2	SSX5:1	SSX3:1	SSX2:1	SSX7:1	SSX1:1	SSX9:1	DMRTB1:1	FMR1NB:1	PAGE1:1	CTAG2:1	PAGE2:1	PAGE5:1	VCX3A:1	SLCO1B1:1	MAGEB2:1	PPP1R2P9:1	PAGE2B:1
54	ID142	2	0.169774
brca.gse2034	null
brca.tcga	PAGE2B	PAGE2	PAGE5	MAGEC2	SSX7	SSX1	MAGEC1	MAGEA5	MAGEA12	VCX3A	VCX2	MAGEA4	SSX2	MAGEA3	MAGEA8	CSAG1	GBA3	SSX5	SSX3	MAGEA1	COX7B2	CTAG2	MAGEA10	FAM133A	GTSF1	MAEL	CSAG3	LGSN	XAGE3	FMR1NB	MKRN3	FSTL5	DSCR8	MAGEB1	MYT1L	MAGEB6	LINC00470	TTTY13	MAGEB2	C12orf56	DCAF4L2	SSX9	OR8G2	MAGEA11	PAGE1	GLT25D2	SLCO6A1	CHKA	CSMD1
coad.gse14333	null
coad.tcga	CT45A6	CTAG2	PAGE1	DSCR8	PAGE4	DPPA2	CRH	COX7B2	MAGEC1	MAGEA10	LGALS14	CXorf48	LIN28B	GABRG3	ACTN2	HOXC13	FSTL5	OR52N1	JPH3	CCNY	MIEN1	RS1	HOXC12	PNMA5	SOHLH1	SLC10A2	SLC27A6	NAALAD2	RARA	TP53TG3	FAM9B	PNMT	MLLT10	PCDHB6	CRISP2	PCDHB5	SAGE1	PCDHB17	PAGE5	DSCR4	UPK1B	PTH1R	TAS2R38	SLC26A7	PTCD1	POTEB	DCAF4L2	POTEH	LIPC
ov.gse9891	null
ov.tcga	null
Top genes:	PAGE5:2	MAGEC1:2	COX7B2:2	CTAG2:2	MAGEA10:2	FSTL5:2	DSCR8:2	DCAF4L2:2	PAGE1:2	SOHLH1:2	PAGE2B:1	PAGE2:1	MAGEC2:1	SSX7:1	SSX1:1	MAGEA5:1	MAGEA12:1	VCX3A:1	VCX2:1	MAGEA4:1
55	ID177	2	0.0740065
brca.gse2034	null
brca.tcga	CYP3A5	CYP3A7	CYP3A4	CEACAM7	GPR115	CEACAM5	GABRA2	TSPAN8	MYT1	CEACAM6	ANKRD34A	UBR1	MGLL	MARCH11	SERF2	ITGA3	GPX2	GPRC5C	GCNT3	NR1D1	FFAR2	FAM131B	ERO1L	ST6GALNAC1	PTPRH	CST8	ZNF609	CEACAM8	EID1	PLCXD3	LRBA	EPHA5	FRRS1	SNPH	LEO1	SYTL2	FAM110C	JPH3	GUCY1A2	CXCL6	NLGN4Y	MGST2	CRYBA2	ZNF385A	LOC641367	FA2H	YPEL2	SLC37A1	LYPD3
coad.gse14333	null
coad.tcga	CYP3A7	CYP3A5	CYP3A4	SLC44A4	IQSEC2	ABP1	CDHR5	TMC4	LY75	MEP1A	SEC16B	SLC40A1	CNGA1	KLC4	VIPR1	RNASEL	POLD4	SEMA3B	MYO7B	MGLL	PLEKHA6	B3GNT8	TJP3	MOGAT3	SMPD3	CHIC1	PTPRH	INPP1	BAIAP2L1	FANK1	KCNE3	SPIN2A	VILL	CEACAM3	C2orf55	SPIN2B	TP53TG1	RAB17	AGFG2	CEACAM1	C5orf4	MAPK3	ABCG1	FAM63A	SH3YL1	APOBEC1	CLDN23	TRIM4	ANXA13
ov.gse9891	null
ov.tcga	null
Top genes:	CYP3A5:2	CYP3A7:2	CYP3A4:2	MGLL:2	PTPRH:2	CEACAM7:1	GPR115:1	CEACAM5:1	GABRA2:1	TSPAN8:1	MYT1:1	CEACAM6:1	ANKRD34A:1	UBR1:1	MARCH11:1	SERF2:1	ITGA3:1	GPX2:1	GPRC5C:1	GCNT3:1
56	ID160	1	0.489168
brca.gse2034	null
brca.tcga	null
coad.gse14333	null
coad.tcga	MSTN	OR5B17	CCDC60	RAB19	GLIPR1L1	USH2A	PPFIA2	DNAH3	HECW1	ULBP1	C4orf45	GNRHR	OR13G1	ATP1B4	SPRR2G	CNBD1	DPPA3P2	SLC10A6	ANKS1B	FHL5	GUCA1C	OR52E2	LEFTY2	DRD2	CCER1	TMEM202	TMCO5A	OR10T2	DPYSL5	OR4K1	OR4S2	TRHR	OR10G3	GAPDHS	CATSPERD	CSRNP3	OR9I1	NMBR	RSPH10B	DCDC5	ZIM3	TEX13A	ABCB11	RP1	TBX5	CXorf27	TMIE	WNT16	SNX31
ov.gse9891	null
ov.tcga	null
Top genes:	MSTN:1	OR5B17:1	CCDC60:1	RAB19:1	GLIPR1L1:1	USH2A:1	PPFIA2:1	DNAH3:1	HECW1:1	ULBP1:1	C4orf45:1	GNRHR:1	OR13G1:1	ATP1B4:1	SPRR2G:1	CNBD1:1	DPPA3P2:1	SLC10A6:1	ANKS1B:1	FHL5:1
57	ID135	1	0.476688
brca.gse2034	null
brca.tcga	null
coad.gse14333	null
coad.tcga	null
ov.gse9891	ZNF322	ZKSCAN4	ZNF184	HCG18	ABT1	TRIM39	ZNF187	ZSCAN16	TAF11	ZKSCAN3	PGBD1	MRS2	ABCF1	NUP153	DHX16	TDP2	ZSCAN12	ZNRD1	RDBP	ZBTB9	ZNF193	PRR3	SNRPC	ZNF311	PRPF4B	JARID2	LSM2	TRIM27	MDC1	CSNK2B	BTN2A1	ATAT1	TUBB	BAG6	PPP1R11	EHMT2	HCG8	FKBPL	GPANK1	C6orf62	DEK	E2F3	PPIL1	CDYL	DTNBP1	NFYA	ANKS1A	RANBP9	VARS2
ov.tcga	null
Top genes:	ZNF322:1	ZKSCAN4:1	ZNF184:1	HCG18:1	ABT1:1	TRIM39:1	ZNF187:1	ZSCAN16:1	TAF11:1	ZKSCAN3:1	PGBD1:1	MRS2:1	ABCF1:1	NUP153:1	DHX16:1	TDP2:1	ZSCAN12:1	ZNRD1:1	RDBP:1	ZBTB9:1
58	ID146	1	0.354592
brca.gse2034	null
brca.tcga	USP32	USP6	APPBP2	HEATR6	PPM1D	CLTC	RPS6KB1	PTRH2	VMP1	DHX40	TUBD1	SMG8	TRIM37	INTS2	BPTF	SUPT4H1	TLK2	MED13	MRPS23	GDPD1	METTL2B	PRKAR1A	MTMR4	COIL	AMZ2P1	PSMC5	PSMD12	COX11	TACO1	DDX5	TOM1L1	SKA2	BCAS3	C17orf80	RAD51C	AMZ2	STRADA	POLG2	COG1	MKS1	NOL11	CYB561	RNF43	STXBP4	HELZ	NME1	MRPL27	METTL2A	ANKRD40
coad.gse14333	null
coad.tcga	null
ov.gse9891	null
ov.tcga	null
Top genes:	USP32:1	USP6:1	APPBP2:1	HEATR6:1	PPM1D:1	CLTC:1	RPS6KB1:1	PTRH2:1	VMP1:1	DHX40:1	TUBD1:1	SMG8:1	TRIM37:1	INTS2:1	BPTF:1	SUPT4H1:1	TLK2:1	MED13:1	MRPS23:1	GDPD1:1
59	ID151	1	0.27044
brca.gse2034	null
brca.tcga	HIST1H3C	HIST2H3C	HIST1H3I	H3F3B	HIST1H3B	HIST1H3G	HIST3H3	SAP30BP	WBP2	MRPS7	NUP85	GALK1	MRPL38	ICT1	ATP5H	SRP68	SUMO2	LLGL2	TSEN54	RECQL5	ANAPC11	UNK	EXOC7	HN1	PSMD12	PRKAR1A	EIF4A3	MIF4GD	BPTF	FAM100B	GGA3	ACOX1	PRPSAP1	KPNA2	PGS1	TLK2	RPL38	C17orf80	DDX5	MED13	HIST1H3E	GPS1	JMJD6	TACO1	FAM104A	FDXR	SEPT9	DCAF7	HIST1H3D
coad.gse14333	null
coad.tcga	null
ov.gse9891	null
ov.tcga	null
Top genes:	HIST1H3C:1	HIST2H3C:1	HIST1H3I:1	H3F3B:1	HIST1H3B:1	HIST1H3G:1	HIST3H3:1	SAP30BP:1	WBP2:1	MRPS7:1	NUP85:1	GALK1:1	MRPL38:1	ICT1:1	ATP5H:1	SRP68:1	SUMO2:1	LLGL2:1	TSEN54:1	RECQL5:1
60	ID179	1	0.231311
brca.gse2034	null
brca.tcga	HIST1H3A	HIST1H3J	H3F3A	HNRNPU	HIST1H3F	HIST3H3	MRPL55	C1orf35	PARP1	GGPS1	GNPAT	C1orf31	TRGV5	TRIM11	RAB3GAP2	FBXO28	TBCE	NUCKS1	KDM5B	SNRPE	LIN9	PFDN2	AHCTF1	HIST1H3I	C1orf96	NVL	LYPLAL1	URB2	ENAH	RFWD2	RPRD2	GON4L	HEATR1	MDM4	POGZ	C1orf55	NENF	C1orf131	F11R	PHF6	NTPCR	ANGEL2	ARID4B	VASP	STX6	RPS6KC1	SH3BP5L	HIST1H3E	INTS3
coad.gse14333	null
coad.tcga	null
ov.gse9891	null
ov.tcga	null
Top genes:	HIST1H3A:1	HIST1H3J:1	H3F3A:1	HNRNPU:1	HIST1H3F:1	HIST3H3:1	MRPL55:1	C1orf35:1	PARP1:1	GGPS1:1	GNPAT:1	C1orf31:1	TRGV5:1	TRIM11:1	RAB3GAP2:1	FBXO28:1	TBCE:1	NUCKS1:1	KDM5B:1	SNRPE:1
61	ID196	1	0.163256
brca.gse2034	null
brca.tcga	PRSS2	PRSS1	PRSS3	SERPIND1	RHOXF2B	DCT	NR0B2	TRIML2	ALAS2	RHAG	PASD1	PRODH2	DPPA4	TYR	APOH	GDF3	APOC3	MLANA	SLC13A5	PGC	HBE1	SIX6	STAU1	SPANXC	CCL16	MYL4	ITIH2	CAMKV	TM4SF5	GATA1	VRTN	SERPINA7	APOA4	APOB	TMPRSS11F	NUP210L	POU5F1	ACPT	FXYD2	PMEL	OR51L1	LINC00301	WDR61	FOSL1	SCGB3A2	ACF	OR51B5	ZNFX1-AS1	C18orf12
coad.gse14333	null
coad.tcga	null
ov.gse9891	null
ov.tcga	null
Top genes:	PRSS2:1	PRSS1:1	PRSS3:1	SERPIND1:1	RHOXF2B:1	DCT:1	NR0B2:1	TRIML2:1	ALAS2:1	RHAG:1	PASD1:1	PRODH2:1	DPPA4:1	TYR:1	APOH:1	GDF3:1	APOC3:1	MLANA:1	SLC13A5:1	PGC:1
[truncated: 2 more columns]
