# Supplementary material for: Biomolecular Events in Cancer Revealed by Attractor Metagenes
Source: PLoS Comput Biol. 2013 Feb 21;9(2):e1002920. doi: 10.1371/journal.pcbi.1002920 (PMC3581797; doi:10.1371/journal.pcbi.1002920)
Supplement: Table S2 — Genomically localized attractors identified from the six datasets. (XLS) [file pcbi.1002920.s002.xls]

## Sheet: Sheet1
Rank	Chromosome	Number of Existed Datasets	Minimum Strength
Dataset	Chromosomal Band	Genes															Strength (5th MI)
1	chr6p21.32	6	0.66505
brca.gse2034	chr6p21.32	HLA-DMA	HLA-DPA1	HLA-DMB	HLA-DRB6	HLA-DRA	HLA-DPB1	PSMB9	PSMB8	TAP1	GPSM3	HLA-DQB1	HLA-DOB	HLA-DQA1	TAPBP	0.746327
brca.tcga	chr6p21.32	HLA-DMB	HLA-DMA	HLA-DPA1	HLA-DRA	HLA-DPB1	HLA-DOA	HLA-DQB1	HLA-DRB5	PSMB9	HLA-DPB2	HLA-DQA2	HLA-DOB	PSMB8	TAP1	0.763889
coad.gse14333	chr6p21.32	HLA-DRA	HLA-DPA1	HLA-DMA	HLA-DRB6	HLA-DPB1	HLA-DMB	HLA-DOA	PSMB9	HLA-DQB1	TAP1	PSMB8	TAP2	HLA-DQA1	LOC100507463	0.762031
coad.tcga	chr6p21.32-p21.31	HLA-DPA1	HLA-DMB	HLA-DMA	HLA-DOA	HLA-DPB1	PSMB9	TAP1	TAPBP	BAK1	HLA-DPB2	PACSIN1	B3GALT4	IP6K3	HMGA1	0.66505
ov.gse9891	chr6p21.32-p21.31	TAP1	PSMB9	PSMB8	TAP2	LOC100507463	HLA-DMA	HLA-DPA1	HLA-DOB	TAPBP	HLA-DPB1	HLA-DMB	HLA-DOA	BAK1	B3GALT4	0.700007
ov.tcga	chr6p21.32	HLA-DRA	HLA-DPB1	HLA-DPA1	HLA-DRB1	HLA-DMA	HLA-DQB1	HLA-DMB	PSMB9	PSMB8	HLA-DRB6	TAP1	HLA-DOA	HLA-DOB	TAP2	0.846274
Top genes:	HLA-DMA:6	HLA-DPA1:6	HLA-DMB:6	HLA-DPB1:6	PSMB9:6	TAP1:6	PSMB8:5	HLA-DOA:5	HLA-DRA:4	HLA-DQB1:4
2	Chr8q24.3 Attractor	6	0.563617
brca.gse2034	chr8q24.3	EXOSC4	CYC1	HSF1	BOP1	GPAA1	FBXL6	SLC39A4	GRINA	RPL8	CPSF1	VPS28	ZNF7	OPLAH	SHARPIN	0.563617
brca.tcga	chr8q24.3	PUF60	SLC52A2	EXOSC4	SHARPIN	FBXL6	PYCRL	FAM203A	ADCK5	BOP1	FAM83H	HSF1	SCRIB	CYC1	ZNF707	0.657195
coad.gse14333	chr8q24.3	PUF60	PPP1R16A	FBXL6	SHARPIN	SLC52A2	SCRIB	CPSF1	DGAT1	HSF1	ADCK5	CYC1	EXOSC4	VPS28	TIGD5	0.618671
coad.tcga	chr8q24.3	BOP1	ZNF696	FAM203A	EEF1D	HSF1	TOP1MT	SCRIB	PUF60	SLC52A2	ZNF623	FAM83H	ZNF707	PYCRL	HEATR7A	0.630659
ov.gse9891	chr8q24.3	MAF1	EXOSC4	SHARPIN	CYHR1	CYC1	SLC52A2	PUF60	GPAA1	BOP1	HSF1	CPSF1	FBXL6	PPP1R16A	MFSD3	0.710684
ov.tcga	chr8q24.3	EXOSC4	GPAA1	ZNF7	HSF1	DGAT1	BOP1	ZNF16	FAM203A	SLC52A2	VPS28	ZNF34	GRINA	C8orf33	ZNF250	0.616516
Top genes:	HSF1:6	EXOSC4:5	BOP1:5	SLC52A2:5	CYC1:4	FBXL6:4	SHARPIN:4	PUF60:4	GPAA1:3	CPSF1:3
3	chr6p22.2	6	0.539843
brca.gse2034	chr6p22.2-p22.1	HIST1H3D	HIST1H1C	HIST1H4H	HIST1H2BK	HIST1H2AE	HIST1H2BD	HIST1H2BG	HIST1H2BB	HIST1H4D	HIST1H2AB	HIST1H1D	HIST1H2BJ	HIST1H3B	HIST1H4E	0.63451
brca.tcga	chr6p22.2-p22.1	HIST1H2BF	HIST1H2BI	HIST1H2BE	HIST1H2BB	HIST1H1E	HIST1H2BG	HIST1H2BH	HIST1H2BJ	HIST1H2BD	HIST1H2AD	HIST1H2BK	HIST1H4H	HIST1H1C	HIST1H3D	0.847549
coad.gse14333	chr6p22.2-p22.1	HIST1H2BD	HIST1H2BK	HIST1H2BG	HIST1H3D	HIST1H1C	HIST1H2AE	HIST1H4H	HIST1H4E	HIST1H3B	HIST1H3C	HIST1H4G	HIST1H2BJ	HIST1H2AB	HIST1H2BB	0.539843
coad.tcga	chr6p22.2	HIST1H2BB	HIST1H2BF	HIST1H2BI	HIST1H2BE	HIST1H2BG	HIST1H2BD	HIST1H2AD	HIST1H1E	HIST1H2BH	HIST1H2AE	HIST1H1C	HIST1H2AC	HIST1H3D	HIST1H4H	0.885982
ov.gse9891	chr6p22.2-p22.1	HIST1H3D	HIST1H1C	HIST1H4H	HIST1H2BD	HIST1H2BK	HIST1H2AE	HIST1H2BG	HIST1H4E	HIST1H4D	HIST1H2BJ	HIST1H1T	HIST1H1D	HIST1H4F	HIST1H1E	0.598132
ov.tcga	chr6p22.2	HIST1H2BF	HIST1H2BE	HIST1H2BH	HIST1H1C	HIST1H2BI	HIST1H3D	HIST1H4H	HIST1H2BC	HIST1H2AC	HIST1H2BD	HIST1H2AE	HIST1H2BG	HIST1H4E	HIST1H3G	0.705958
Top genes:	HIST1H3D:6	HIST1H1C:6	HIST1H4H:6	HIST1H2BD:6	HIST1H2BG:6	HIST1H2AE:5	HIST1H2BK:4	HIST1H2BB:4	HIST1H2BJ:4	HIST1H4E:4
4	chr13q34	6	0.534119
brca.gse2034	chr13q33.3-q34	CUL4A	CARKD	UPF3A	PCID2	CDC16	ARHGEF7	CARS2	TUBGCP3	DCUN1D2	ARGLU1	LAMP1	ANKRD10	ING1	MCF2L-AS1	0.558998
brca.tcga	chr13q33.1-q34	TFDP1	TUBGCP3	PCID2	TEX30	CUL4A	CARS2	ATP11A	ARHGEF7	LAMP1	ABHD13	DCUN1D2	BIVM	ANKRD10	TMCO3	0.534119
coad.gse14333	chr13q34	CUL4A	PCID2	TUBGCP3	ATP11A	CDC16	UPF3A	LAMP1	GRTP1	ING1	CHAMP1	ARHGEF7	CARKD	CARS2	ANKRD10	0.604677
coad.tcga	chr13q34	CUL4A	CDC16	TUBGCP3	PCID2	ATP11A	UPF3A	ANKRD10	ARHGEF7	TFDP1	DCUN1D2	MCF2L	GRTP1	LAMP1	CHAMP1	0.645725
ov.gse9891	chr13q34	PCID2	UPF3A	CUL4A	DCUN1D2	CDC16	CHAMP1	TFDP1	TMCO3	LAMP1	GAS6	GRTP1	ATP11A	MCF2L-AS1	MCF2L	0.576733
ov.tcga	chr13q34	CUL4A	ARHGEF7	CARKD	PCID2	TUBGCP3	TFDP1	DCUN1D2	CARS2	ING1	UPF3A	CDC16	TMCO3	LAMP1	ANKRD10	0.613535
Top genes:	CUL4A:6	PCID2:6	LAMP1:6	UPF3A:5	CDC16:5	ARHGEF7:5	TUBGCP3:5	DCUN1D2:5	ANKRD10:5	CARS2:4
5	chr6p21.1	6	0.526663
brca.gse2034	chr6p21.2-p21.1	PTCRA	APOBEC2	NCR2	GUCA1B	TSPO2	TREML2	GUCA1A	PPP2R5D	FRS3	MDFI	PRPH2	GNMT	MOCS1	PGC	0.526663
brca.tcga	chr6p21.1	MRPS10	PPP2R5D	RPL7L1	RRP36	TBCC	MEA1	GTPBP2	XPO5	POLR1C	UBR2	MRPS18A	KLHDC3	MRPL14	TJAP1	0.538363
coad.gse14333	chr6p21.1	XPO5	BYSL	POLR1C	C6orf132	MED20	KLHDC3	ZNF318	UBR2	TOMM6	TBCC	PPP2R5D	YIPF3	MRPS10	ABCC10	0.626738
coad.tcga	chr6p21.1	BYSL	TJAP1	MEA1	UBR2	PPP2R5D	XPO5	TBCC	KLHDC3	RRP36	CUL9	GTPBP2	FRS3	USP49	RPL7L1	0.54652
ov.gse9891	chr6p21.1	YIPF3	TJAP1	MEA1	BYSL	CNPY3	CUL7	TBCC	RRP36	MED20	UBR2	TOMM6	ZNF318	KLHDC3	XPO5	0.659623
ov.tcga	chr6p21.1	YIPF3	MRPS18A	CDC5L	POLR1C	MAD2L1BP	GTPBP2	ZNF318	TJAP1	C6orf108	HSP90AB1	ENPP4	SUPT3H	SLC29A1	ABCC10	0.610703
Top genes:	PPP2R5D:4	TBCC:4	XPO5:4	UBR2:4	KLHDC3:4	TJAP1:4	RRP36:3	MEA1:3	GTPBP2:3	POLR1C:3
6	chr5q31.1	6	0.507498
brca.gse2034	chr5q31.1-q31.2	ZCCHC10	C5orf15	CAMLG	SKP1	FAM13B	UBE2B	NME5	PPP2CA	SAR1B	DDX46	TXNDC15	PHF15	HNRNPA0	CDKL3	0.562167
brca.tcga	chr5q31.1	SKP1	C5orf15	UBE2B	PPP2CA	CAMLG	RAD50	ZCCHC10	AFF4	SAR1B	SLC22A5	PHF15	CDKL3	DDX46	KIF3A	0.507498
coad.gse14333	chr5q31.1-q31.2	PPP2CA	HSPA4	C5orf24	SAR1B	VDAC1	SEC24A	H2AFY	UBE2B	SMAD5	ZCCHC10	CDKN2AIPNL	HNRNPA0	C5orf15	SKP1	0.542397
coad.tcga	chr5q23.3-q31.1	SAR1B	UQCRQ	HINT1	SKP1	ZCCHC10	PPP2CA	CDKL3	CDC42SE2	VDAC1	UBE2B	C5orf24	C5orf15	SEC24A	HSPA4	0.552118
ov.gse9891	chr5q31.1	PPP2CA	VDAC1	ZCCHC10	UQCRQ	HSPA4	C5orf24	SAR1B	SEC24A	C5orf15	SKP1	AFF4	RAPGEF6	RAD50	TXNDC15	0.543488
ov.tcga	chr5q23.3-q31.1	SKP1	VDAC1	PPP2CA	C5orf15	HINT1	UQCRQ	UBE2B	RAD50	HSPA4	ISOC1	RAPGEF6	ZCCHC10	P4HA2	SLC22A5	0.526274
Top genes:	ZCCHC10:6	C5orf15:6	SKP1:6	PPP2CA:6	UBE2B:5	SAR1B:5	HSPA4:4	VDAC1:4	CDKL3:3	RAD50:3
7	chr18p11.21	6	0.501988
brca.gse2034	chr18p11.22-q11.2	SEH1L	PSMG2	RALBP1	CEP76	AFG3L2	RNMT	PPP4R1	CEP192	SNRPD1	PTPN2	VAPA	IMPA2	NAPG	ANKRD12	0.577185
brca.tcga	chr18p11.22-p11.21	CEP76	CEP192	PTPN2	SEH1L	RNMT	PSMG2	FAM210A	IMPA2	CHMP1B	AFG3L2	ZNF519	RALBP1	SLMO1	SPIRE1	0.561119
coad.gse14333	chr18p11.22-p11.21	CEP76	SEH1L	NDUFV2	CEP192	PTPN2	NAPG	PSMG2	RALBP1	AFG3L2	PPP4R1	RNMT	FAM210A	IMPA2	VAPA	0.628723
coad.tcga	chr18p11.22-q11.2	PTPN2	SEH1L	NDUFV2	VAPA	CEP76	RNMT	FAM210A	RALBP1	PPP4R1	PSMG2	NAPG	ESCO1	CEP192	SNRPD1	0.560191
ov.gse9891	chr18p11.21-q11.2	SEH1L	PSMG2	FAM210A	RNMT	PTPN2	AFG3L2	CEP76	SNRPD1	CEP192	C18orf8	IMPA2	MPPE1	CHMP1B	ESCO1	0.597834
ov.tcga	chr18p11.22-q11.2	SEH1L	IMPA2	PPP4R1	RNMT	CHMP1B	MPPE1	CEP76	PSMG2	NDUFV2	VAPA	CEP192	SNRPD1	AFG3L2	PTPN2	0.501988
Top genes:	SEH1L:6	PSMG2:6	CEP76:6	RNMT:6	CEP192:6	PTPN2:6	AFG3L2:5	IMPA2:5	RALBP1:4	PPP4R1:4
8	chr20q13.33	6	0.492428
brca.gse2034	chr20q13.33	RTEL1	RTEL1-TNFRSF6B	KCNQ2	CHRNA4	ARFRP1	BIRC7	LIME1	C20orf195	PRPF6	STMN3	ZGPAT	ARFGAP1	SLC2A4RG	PPDPF	0.492428
brca.tcga	chr20q13.33	ARFGAP1	PRPF6	TPD52L2	ZGPAT	YTHDF1	UCKL1	ZNF512B	C20orf11	ARFRP1	SLC2A4RG	DIDO1	RTEL1	DNAJC5	GMEB2	0.566571
coad.gse14333	chr20q13.33	YTHDF1	C20orf11	ADRM1	TAF4	PSMA7	TCFL5	SS18L1	OSBPL2	DIDO1	C20orf20	ARFGAP1	GTPBP5	OGFR	CABLES2	0.62462
coad.tcga	chr20q13.33	DIDO1	YTHDF1	SS18L1	OSBPL2	C20orf11	ARFGAP1	ADRM1	GTPBP5	GMEB2	COL9A3	RPS21	CABLES2	PPDPF	SLCO4A1	0.603654
ov.gse9891	chr20q13.33	YTHDF1	C20orf11	OSBPL2	C20orf20	SS18L1	DIDO1	ARFGAP1	PSMA7	CABLES2	ADRM1	RPS21	GTPBP5	LAMA5	TCFL5	0.548379
ov.tcga	chr20q13.33	OSBPL2	C20orf20	SS18L1	YTHDF1	C20orf11	ARFGAP1	ADRM1	DIDO1	PSMA7	TCFL5	LAMA5	PPDPF	OGFR	SLC17A9	0.521261
Top genes:	ARFGAP1:6	YTHDF1:5	C20orf11:5	DIDO1:5	ADRM1:4	SS18L1:4	OSBPL2:4	PPDPF:3	PSMA7:3	TCFL5:3
9	chr1q23.3	6	0.480434
brca.gse2034	chr1q23.2-q23.3	NDUFS2	B4GALT3	USP21	UFC1	DEDD	NIT1	SDHC	PPOX	F11R	PFDN2	NCSTN	COPA	DCAF8	PEX19	0.542363
brca.tcga	chr1q23.2-q23.3	CD48	SLAMF1	ARHGAP30	SLAMF7	LY9	CD244	SLAMF6	FCRLA	CD84	FCGR2B	FCER1G	FCGR2A	FCGR3A	ITLN1	0.735055
coad.gse14333	chr1q23.2-q23.3	FCER1G	FCGR3B	FCGR2B	FCGR2A	CD84	ARHGAP30	CD48	OLFML2B	SLAMF7	SLAMF1	HSPA6	SLAMF6	B4GALT3	CD244	0.572648
coad.tcga	chr1q23.1-q23.3	SLAMF7	SLAMF8	CD84	PYHIN1	CD48	SLAMF1	CD244	ARHGAP30	AIM2	MNDA	IFI16	LY9	DARC	SLAMF6	0.631241
ov.gse9891	chr1q23.2-q23.3	FCER1G	CD84	CD48	FCGR2A	FCGR2B	ARHGAP30	FCGR3B	SLAMF7	SLAMF1	LY9	HSPA6	OLFML2B	SLAMF6	CD244	0.738092
ov.tcga	chr1q23.2-q23.3	USP21	PEX19	DEDD	NIT1	B4GALT3	DUSP12	SDHC	NDUFS2	NCSTN	F11R	UFC1	PFDN2	COPA	PPOX	0.480434
Top genes:	CD48:4	SLAMF1:4	ARHGAP30:4	SLAMF7:4	CD244:4	SLAMF6:4	CD84:4	B4GALT3:3	LY9:3	FCGR2B:3
10	chr17q25.3	6	0.46366
brca.gse2034	chr17q25.3	GPS1	HGS	MRPL12	RFNG	ASPSCR1	DUS1L	NPLOC4	P4HB	ARHGDIA	SLC25A10	SIRT7	PYCR1	STRA13	PCYT2	0.566737
brca.tcga	chr17q25.3	GPS1	DUS1L	SIRT7	ASPSCR1	LRRC45	ARHGDIA	HGS	SLC25A10	PCYT2	MRPL12	TBCD	RFNG	C17orf62	P4HB	0.680381
coad.gse14333	chr17q25.3	MRPL12	GPS1	ALYREF	STRA13	SLC25A10	DCXR	DUS1L	PCYT2	FOXK2	NARF	PYCR1	P4HB	TBCD	ASPSCR1	0.570835
coad.tcga	chr17q25.3	C17orf56	AZI1	RPTOR	HGS	SLC38A10	C17orf70	MAFG	NPLOC4	P4HB	CCDC137	RNF213	SLC26A11	C17orf89	SIRT7	0.46366
ov.gse9891	chr17q25.3	HGS	GPS1	MRPL12	DUS1L	ANAPC11	SIRT7	RFNG	CSNK1D	C17orf70	FOXK2	NPLOC4	C17orf90	CCDC137	STRA13	0.583919
ov.tcga	chr17q25.3	CSNK1D	FN3KRP	DUS1L	TBCD	FOXK2	WDR45L	C17orf62	NARF	SIRT7	GPS1	C17orf101	RFNG	FASN	PCYT2	0.574663
Top genes:	GPS1:5	DUS1L:5	SIRT7:5	HGS:4	MRPL12:4	RFNG:4	P4HB:4	PCYT2:4	ASPSCR1:3	NPLOC4:3
11	chr12q24.31	6	0.456948
brca.gse2034	chr12q24.22-q24.31	SRSF9	RNF34	FBXO21	C12orf43	ANAPC5	GCN1L1	COX6A1	RNF10	RFC5	PEBP1	UNC119B	MLEC	POP5	RPLP0	0.497629
brca.tcga	chr12q24.31	SRSF9	DIABLO	VPS33A	C12orf43	COQ5	RNF34	TRIAP1	COX6A1	ANAPC5	PSMD9	SETD1B	P2RX4	POP5	RNF10	0.456948
coad.gse14333	chr12q24.31	SRSF9	DIABLO	DENR	RNF34	ANAPC5	KNTC1	DYNLL1	ZCCHC8	RSRC2	POP5	TRIAP1	COQ5	RNF10	CLIP1	0.636492
coad.tcga	chr12q24.31	KDM2B	SETD1B	SETD8	DDX55	SBNO1	HIP1R	CLIP1	PITPNM2	MLXIP	DENR	RSRC2	KNTC1	ZCCHC8	BCL7A	0.484172
ov.gse9891	chr12q24.31	RNF34	C12orf43	DIABLO	POP5	DENR	ANAPC5	SPPL3	COQ5	RSRC2	SRSF9	KDM2B	UNC119B	GATC	PSMD9	0.544423
ov.tcga	chr12q24.23-q24.31	ANAPC5	POP5	DIABLO	RNF34	PSMD9	TRIAP1	C12orf43	SRSF9	GCN1L1	DYNLL1	COX6A1	RPLP0	VPS33A	UNC119B	0.628865
Top genes:	SRSF9:5	RNF34:5	ANAPC5:5	POP5:5	C12orf43:4	DIABLO:4	COX6A1:3	RNF10:3	UNC119B:3	COQ5:3
12	chr21q22.3	6	0.443343
brca.gse2034	chr21q22.3	PDXK	CSTB	RRP1	PWP2	U2AF1	SUMO3	PFKL	RRP1B	CBS	PTTG1IP	PDE9A	TRAPPC10	C21orf33	UBE2G2	0.443343
brca.tcga	chr21q22.3	RRP1	RRP1B	PWP2	FAM207A	PDXK	CSTB	PFKL	SUMO3	PTTG1IP	AGPAT3	UBE2G2	U2AF1	CBS	TRAPPC10	0.472674
coad.gse14333	chr21q22.3	PWP2	C21orf33	PFKL	PDXK	AGPAT3	UBE2G2	RRP1	TRAPPC10	RRP1B	CSTB	FAM207A	SUMO3	LOC284837	ICOSLG	0.508323
coad.tcga	chr21q22.3	PWP2	RRP1	RRP1B	AGPAT3	U2AF1	PDXK	TRAPPC10	ICOSLG	PFKL	C21orf33	CSTB	WDR4	SLC37A1	PKNOX1	0.471242
ov.gse9891	chr21q22.3	PWP2	C21orf33	UBE2G2	RRP1	PFKL	AGPAT3	TRAPPC10	FAM207A	PDXK	CSTB	PTTG1IP	RRP1B	SUMO3	TRPM2	0.47127
ov.tcga	chr21q22.3	PWP2	PFKL	UBE2G2	TRAPPC10	RRP1	RRP1B	U2AF1	PDXK	C21orf33	CSTB	AGPAT3	PKNOX1	SLC37A1	CBS	0.521351
Top genes:	PDXK:6	CSTB:6	RRP1:6	PWP2:6	PFKL:6	RRP1B:6	TRAPPC10:6	C21orf33:5	UBE2G2:5	AGPAT3:5
13	chr3p21.31	6	0.442452
brca.gse2034	chr3p21.31	P4HTM	IMPDH2	DALRD3	QARS	APEH	NDUFAF3	LAMB2	UQCRC1	IP6K1	ARIH2	WDR6	DAG1	QRICH1	RNF123	0.442452
brca.tcga	chr3p21.31	APEH	RNF123	DALRD3	USP19	ATRIP	P4HTM	QARS	IMPDH2	SHISA5	NCKIPSD	GMPPB	RHOA	KLHDC8B	UQCRC1	0.582712
coad.gse14333	chr3p21.31	DHX30	SETD2	CDC25A	SMARCC1	NME6	CCDC12	ATRIP	CCDC51	SHISA5	PTPN23	SCAP	C3orf75	NBEAL2	CCDC72	0.568792
coad.tcga	chr3p21.31	SLC26A6	PLXNB1	NCKIPSD	QARS	USP19	ZNF589	WDR6	USP4	IP6K2	ARIH2	ATRIP	MAP4	SHISA5	IMPDH2	0.475456
ov.gse9891	chr3p21.31	QRICH1	DHX30	SETD2	ARIH2	CCDC12	IP6K2	C3orf75	SMARCC1	CCDC72	NCKIPSD	SCAP	UQCRC1	MAP4	NDUFAF3	0.537859
ov.tcga	chr3p21.31	DHX30	SETD2	SCAP	ARIH2	SMARCC1	MAP4	KLHL18	PLXNB1	IP6K2	NCKIPSD	NME6	UQCRC1	NBEAL2	PRKAR2A	0.539647
Top genes:	UQCRC1:4	ARIH2:4	NCKIPSD:4	IMPDH2:3	QARS:3	ATRIP:3	SHISA5:3	DHX30:3	SETD2:3	SMARCC1:3
14	chr16p11.2	6	0.442315
brca.gse2034	chr16p11.2	BCKDK	RNF40	ZNF768	PHKG2	KAT8	CD2BP2	ZNF688	PRR14	PRSS8	TBC1D10B	BCL7C	STX4	ZNF629	MAPK3	0.442315
brca.tcga	chr16p11.2	RNF40	KAT8	SRCAP	BCKDK	ORAI3	ZNF747	PHKG2	C16orf58	ZNF688	PRR14	ZNF768	ZNF629	ARMC5	ZNF764	0.508445
coad.gse14333	chr16p11.2	FBXL19	ZNF629	RNF40	SETD1A	BCL7C	ZNF48	ZNF646	PRR14	PHKG2	STX4	DCTPP1	ZNF747	ZNF771	MAPK3	0.578921
coad.tcga	chr16p11.2	ZNF629	SETD1A	RNF40	ZNF646	TBC1D10B	STX4	ZNF768	PRR14	ZNF48	SRCAP	ZNF747	ZNF668	SEPHS2	PHKG2	0.513208
ov.gse9891	chr16p11.2	BCKDK	CD2BP2	PRR14	TBC1D10B	RNF40	PHKG2	ZNF629	FBRS	ZNF768	FBXL19	BCL7C	PPP4C	DCTPP1	ZNF689	0.498845
ov.tcga	chr16p11.2	BCKDK	TBC1D10B	RNF40	MAPK3	PRR14	CD2BP2	STX4	PHKG2	ZNF764	SEPHS2	BCL7C	ZNF688	KAT8	ZNF747	0.485816
Top genes:	RNF40:6	PHKG2:6	PRR14:6	ZNF629:5	BCKDK:4	ZNF768:4	TBC1D10B:4	BCL7C:4	STX4:4	ZNF747:4
15	chr20p13	6	0.44111
brca.gse2034	chr20p13	IDH3B	PTPRA	PSMF1	FASTKD5	NSFL1C	SNRPB	VPS16	FKBP1A	NOP56	UBOX5	SNPH	ProSAPiP1	SIRPG	ZNF343	0.44111
brca.tcga	chr20p13	NOP56	IDH3B	SNRPB	NSFL1C	STK35	CSNK2A1	PSMF1	ZNF343	VPS16	SRXN1	PTPRA	FKBP1A	FAM113A	FAM110A	0.498151
coad.gse14333	chr20p13	PSMF1	CSNK2A1	STK35	MRPS26	SNRPB	IDH3B	NSFL1C	NOP56	PTPRA	VPS16	SRXN1	FKBP1A	SLC52A3	FAM110A	0.710004
coad.tcga	chr20p13	ITPA	IDH3B	DDRGK1	NSFL1C	NOP56	VPS16	C20orf27	PTPRA	FASTKD5	MRPS26	SNRPB	ZNF343	FKBP1A	STK35	0.601402
ov.gse9891	chr20p13	CSNK2A1	NSFL1C	PSMF1	STK35	FKBP1A	TBC1D20	SNRPB	ZCCHC3	RBCK1	SRXN1	NRSN2	SOX12	SLC52A3	FAM110A	0.585023
ov.tcga	chr20p13	NSFL1C	FASTKD5	PSMF1	IDH3B	PTPRA	VPS16	NOP56	SNRPB	FKBP1A	UBOX5	ProSAPiP1	TMEM74B	ZNF343	SIRPA	0.580523
Top genes:	NSFL1C:6	SNRPB:6	FKBP1A:6	IDH3B:5	PTPRA:5	PSMF1:5	VPS16:5	NOP56:5	ZNF343:4	STK35:4
16	chr17p13.1	6	0.438391
brca.gse2034	chr17p13.1	MPDU1	GPS2	CLDN7	GABARAP	SENP3	CHRNB1	ACADVL	FXR2	KDM6B	TP53	C17orf81	DVL2	EFNB3	TNK1	0.455709
brca.tcga	chr17p13.1	NEURL4	ACADVL	MPDU1	PHF23	FXR2	CTDNEP1	TMEM102	GABARAP	GPS2	KCTD11	CHRNB1	SENP3	DVL2	EIF5A	0.441845
coad.gse14333	chr17p13.1	MPDU1	LSMD1	CTDNEP1	PHF23	C17orf61	WRAP53	GABARAP	C17orf81	CYB5D1	SAT2	GPS2	POLR2A	KCTD11	SENP3	0.438391
coad.tcga	chr17p13.1	EIF4A1	EIF5A	WRAP53	MPDU1	LSMD1	CYB5D1	GPS2	FXR2	TMEM102	NEURL4	POLR2A	CD68	SAT2	CLDN7	0.495292
ov.gse9891	chr17p13.1	GPS2	SENP3	DVL2	GABARAP	CTDNEP1	NEURL4	C17orf81	PHF23	ACADVL	C17orf61	ZBTB4	POLR2A	CLDN7	NLGN2	0.521535
ov.tcga	chr17p13.1	SENP3	WRAP53	MPDU1	FXR2	EIF4A1	PFAS	AURKB	EFNB3	CTC1	KDM6B	VAMP2	TP53	CHD3	SOX15	0.495457
Top genes:	MPDU1:5	GPS2:5	SENP3:5	GABARAP:4	FXR2:4	CLDN7:3	ACADVL:3	C17orf81:3	DVL2:3	NEURL4:3
17	chr16p13.3	6	0.432614
brca.gse2034	chr16p13.3	ECI1	NME3	HAGH	HN1L	E4F1	NUBP2	MRPS34	TBL3	NTHL1	SPSB3	GFER	RAB26	IFT140	MLST8	0.521085
brca.tcga	chr16p13.3	METRN	FAM173A	WDR24	NME3	MRPS34	NARFL	NUBP2	IFT140	WDR90	HAGHL	RHOT2	LMF1	HN1L	CLCN7	0.576117
coad.gse14333	chr16p13.3	C16orf13	MRPS34	FAM195A	C16orf91	STUB1	TELO2	HN1L	WDR90	RHOT2	RPUSD1	RAB40C	NME3	NARFL	FAM173A	0.557276
coad.tcga	chr16p13.3	C16orf42	RPUSD1	SPSB3	MRPS34	NUBP2	NARFL	UBE2I	CLCN7	TELO2	NME3	HAGH	MSRB1	WDR24	GNPTG	0.432614
ov.gse9891	chr16p13.3	TBL3	MRPS34	C16orf42	TELO2	NDUFB10	SPSB3	C16orf91	GNPTG	FAHD1	HN1L	HAGH	GFER	IFT140	CRAMP1L	0.56238
ov.tcga	chr16p13.3	TBL3	TSC2	MLST8	RNPS1	SPSB3	NUBP2	NTHL1	E4F1	C16orf59	ECI1	HAGH	MSRB1	CCNF	RPS2	0.541536
Top genes:	MRPS34:5	NME3:4	HAGH:4	HN1L:4	NUBP2:4	SPSB3:4	TBL3:3	IFT140:3	NARFL:3	TELO2:3
18	chr17q25.1	6	0.424229
brca.gse2034	chr17q25.1	ATP5H	ICT1	MRPS7	NUP85	ACOX1	KCTD2	SAP30BP	HN1	WBP2	H3F3B	LLGL2	KIAA0195	CASKIN2	FDXR	0.448263
brca.tcga	chr17q25.1	ICT1	ATP5H	TSEN54	NUP85	MRPS7	LLGL2	SAP30BP	RECQL5	HN1	FDXR	MIF4GD	NAT9	GGA3	KCTD2	0.578118
coad.gse14333	chr17q25.1	MRPS7	ATP5H	ICT1	SRP68	NUP85	GRB2	PRPSAP1	TSEN54	MRPL38	SAP30BP	NT5C	SUMO2	ACOX1	HN1	0.524131
coad.tcga	chr17q25.1	SAP30BP	EXOC7	H3F3B	UNK	GGA3	ITGB4	EVPL	GRB2	FAM100B	LLGL2	SRP68	CASKIN2	RECQL5	KIAA0195	0.424229
ov.gse9891	chr17q25.1	MRPS7	NUP85	ICT1	SAP30BP	ATP5H	TSEN54	GGA3	SUMO2	KCTD2	GRB2	NAT9	SLC25A19	MIF4GD	NT5C	0.544467
ov.tcga	chr17q25.1	MRPS7	ICT1	NUP85	HN1	ATP5H	SUMO2	GRB2	CDR2L	NT5C	KCTD2	GGA3	NAT9	ARMC7	GPRC5C	0.58501
Top genes:	ATP5H:5	ICT1:5	MRPS7:5	NUP85:5	SAP30BP:5	KCTD2:4	HN1:4	GGA3:4	GRB2:4	LLGL2:3
19	chrXq24	6	0.420506
brca.gse2034	chrXq24	UBE2A	MCTS1	LAMP2	C1GALT1C1	SLC25A5	NDUFA1	RNF113A	IL13RA1	CXorf56	WDR44	CUL4B	UPF3B	NKRF	PGRMC1	0.460469
brca.tcga	chrXq24	NKAP	SLC25A5	UBE2A	LAMP2	MCTS1	CXorf56	RNF113A	C1GALT1C1	CUL4B	ZBTB33	NDUFA1	SLC25A43	PGRMC1	NKRF	0.420506
coad.gse14333	chrXq24-q25	UBE2A	PGRMC1	STAG2	C1GALT1C1	RNF113A	XIAP	ZBTB33	THOC2	MCTS1	LAMP2	SLC25A43	CUL4B	UPF3B	SLC25A5	0.569063
coad.tcga	chrXq24-q25	NKAP	LAMP2	MCTS1	RNF113A	C1GALT1C1	NKRF	THOC2	STAG2	CUL4B	RPL39	CXorf56	UPF3B	SLC25A5	NDUFA1	0.514072
ov.gse9891	chrXq24-q25	RNF113A	C1GALT1C1	NDUFA1	UBE2A	SLC25A5	MCTS1	XIAP	NKAP	LAMP2	NKRF	ZBTB33	CXorf56	THOC2	CUL4B	0.536668
ov.tcga	chrXq24-q25	MCTS1	UBE2A	RNF113A	C1GALT1C1	SLC25A5	LAMP2	NDUFA1	CUL4B	PGRMC1	CXorf56	NKRF	RPL39	XIAP	UPF3B	0.534396
Top genes:	MCTS1:6	LAMP2:6	C1GALT1C1:6	SLC25A5:6	RNF113A:6	CUL4B:6	UBE2A:5	NDUFA1:5	CXorf56:5	NKRF:5
20	chr4p16.3	6	0.419503
brca.gse2034	chr4p16.3	FAM193A	MAEA	WHSC1	WHSC2	RNF4	SLBP	TNIP2	LETM1	HTT	MFSD10	CTBP1	TACC3	LRPAP1	HAUS3	0.419503
brca.tcga	chr4p16.3	TMEM129	PCGF3	CRIPAK	ZNF721	ATP5I	PIGG	CTBP1-AS1	MAEA	GAK	MYL5	UVSSA	IDUA	ZNF595	CTBP1	0.438616
coad.gse14333	chr4p16.3-p16.2	LYAR	SLBP	TACC3	WHSC1	NOP14	WHSC2	HAUS3	STX18	LETM1	RNF4	TMEM128	TNIP2	TMEM129	LRPAP1	0.554735
coad.tcga	chr4p16.3	LETM1	TACC3	MAEA	UVSSA	WHSC1	GAK	CTBP1	WHSC2	CRIPAK	ZNF721	CTBP1-AS1	PCGF3	TMEM129	ATP5I	0.492417
ov.gse9891	chr4p16.3	MAEA	PIGG	GAK	CTBP1	ATP5I	ZNF721	SLBP	PCGF3	TMEM129	CRIPAK	DGKQ	TMEM175	FAM53A	UVSSA	0.639228
ov.tcga	chr4p16.3	HAUS3	RNF4	FAM193A	WHSC1	TNIP2	WHSC2	MAEA	TACC3	MFSD10	ADD1	HTT	NOP14	LRPAP1	SLBP	0.617803
Top genes:	MAEA:5	WHSC1:4	WHSC2:4	SLBP:4	CTBP1:4	TACC3:4	TMEM129:4	RNF4:3	TNIP2:3	LETM1:3
21	chr9q34.3	6	0.403471
brca.gse2034	chr9q34.3	FUT7	GRIN1	CACNA1B	EHMT1	NDOR1	ENTPD2	TRAF2	ABCA2	RNF208	C8G	SSNA1	NELF	NPDC1	ANAPC2	0.403471
brca.tcga	chr9q34.3	TRAF2	PMPCA	C9orf86	C9orf142	FBXW5	SNAPC4	C9orf69	UBAC1	AGPAT2	SDCCAG3	EDF1	SEC16A	PHPT1	MAMDC4	0.464938
coad.gse14333	chr9q34.3	COBRA1	EDF1	C9orf142	TUBB4B	FBXW5	SSNA1	TMEM203	MAN1B1	SAPCD2	TPRN	TOR4A	PHPT1	C9orf86	TRAF2	0.531766
coad.tcga	chr9q34.3	TRAF2	NOTCH1	C9orf69	SEC16A	SNAPC4	C9orf86	QSOX2	INPP5E	PMPCA	FBXW5	CAMSAP1	EDF1	MAMDC4	AGPAT2	0.451231
ov.gse9891	chr9q34.3	PMPCA	SEC16A	EDF1	SDCCAG3	SNAPC4	MAN1B1	C9orf86	FBXW5	INPP5E	PHPT1	TRAF2	C9orf142	AGPAT2	TMEM141	0.552989
ov.tcga	chr9q34.3	MAN1B1	SSNA1	ANAPC2	EDF1	SEC16A	AGPAT2	TRAF2	CLIC3	NPDC1	EGFL7	NOTCH1	ABCA2	UAP1L1	PTGDS	0.484062
Top genes:	TRAF2:6	EDF1:5	C9orf86:4	FBXW5:4	AGPAT2:4	SEC16A:4	SSNA1:3	PMPCA:3	C9orf142:3	SNAPC4:3
22	chrXq28	6	0.402843
brca.gse2034	chrXq28	AFF2	GABRA3	GPR50	GABRQ	PRRG3	MAGEA8	MAGEA10	MAGEA4	MAMLD1	GABRE	MAGEA11	ZNF185	HMGB3	MTMR1	0.402843
brca.tcga	chrXq28	MAGEA12	MAGEA3	MAGEA5	CSAG1	MAGEA4	CSAG3	MAGEA10	MAGEA9	PASD1	MAGEA8	MAGEA11	PNMA5	GABRE	GABRA3	0.786565
coad.gse14333	chrXq28	IRAK1	LAGE3	SLC10A3	NAA10	UBL4A	DKC1	FAM50A	EMD	FAM3A	ATP6AP1	DNASE1L1	TMEM187	G6PD	F8A1	0.562194
coad.tcga	chrXq28	MAGEA12	MAGEA3	CSAG3	MAGEA1	CSAG1	MAGEA5	MAGEA10	GABRA3	PNMA3	DUSP9	NAA10	PNMA5	SRPK3	BGN	0.802072
ov.gse9891	chrXq28	NAA10	BCAP31	IRAK1	FAM58A	NSDHL	IDH3G	TMEM187	SSR4	HAUS7	ABCD1	ARHGAP4	ZNF275	RENBP	TREX2	0.610986
ov.tcga	chrXq28	FAM3A	SLC10A3	IDH3G	BCAP31	NAA10	EMD	FAM50A	IRAK1	UBL4A	GDI1	LAGE3	ATP6AP1	TMEM187	HAUS7	0.54388
Top genes:	NAA10:4	GABRA3:3	MAGEA10:3	IRAK1:3	TMEM187:3	MAGEA8:2	MAGEA4:2	GABRE:2	MAGEA11:2	MAGEA12:2
23	chr11p15.1	6	0.399223
brca.gse2034	chr11p15.1	C11orf58	PIK3C2A	TSG101	GTF2H1	PRMT3	UEVLD	RPS13	LDHA	ZDHHC13	NUCB2	HTATIP2	HPS5	OR7E14P	LDHC	0.478271
brca.tcga	chr11p15.2-p15.1	UEVLD	SPTY2D1	COPB1	PIK3C2A	TSG101	C11orf58	FAR1	GTF2H1	PLEKHA7	PSMA1	CYP2R1	LDHA	KCNJ11	RPS13	0.494718
coad.gse14333	chr11p15.3-p15.1	GTF2H1	C11orf58	PIK3C2A	PSMA1	USP47	FAR1	COPB1	BTBD10	RPS13	HPS5	LDHA	RRAS2	TEAD1	SERGEF	0.533586
coad.tcga	chr11p15.2-p15.1	C11orf58	PSMA1	UEVLD	TSG101	HPS5	GTF2H1	SPTY2D1	LOC494141	SAAL1	LDHAL6A	PDE3B	ZDHHC13	RPS13	LDHA	0.399223
ov.gse9891	chr11p15.2-p15.1	C11orf58	TSG101	COPB1	GTF2H1	PSMA1	BTBD10	PIK3C2A	SAAL1	UEVLD	RPS13	FAR1	PLEKHA7	HPS5	SERGEF	0.47187
ov.tcga	chr11p15.1	UEVLD	GTF2H1	TSG101	C11orf58	HPS5	PRMT3	LDHA	ZDHHC13	RPS13	HTATIP2	LDHC	E2F8	NUCB2	SAA4	0.552186
Top genes:	C11orf58:6	GTF2H1:6	RPS13:6	TSG101:5	UEVLD:5	LDHA:5	HPS5:5	PIK3C2A:4	PSMA1:4	ZDHHC13:3
24	chr11q14.1	6	0.394849
brca.gse2034	chr11q13.5-q14.1	ALG8	RSF1	C11orf67	CLNS1A	NARS2	NDUFC2	GAB2	PRKRIR	PAK1	TMEM126B	TSKU	MYO7A	CCDC90B	C11orf30	0.648734
brca.tcga	chr11q14.1-q14.2	INTS4	CLNS1A	ALG8	NDUFC2	RSF1	C11orf67	NARS2	USP35	GAB2	KCTD21	AQP11	TMEM126B	CCDC90B	TMEM135	0.710097
coad.gse14333	chr11q13.4-q14.1	NARS2	PRKRIR	CLNS1A	C11orf82	PAK1	ALG8	RPS3	NDUFC2	INTS4	RSF1	UVRAG	AQP11	DGAT2	ACER3	0.458272
coad.tcga	chr11q14.1-q21	CCDC90B	C11orf73	EED	TMEM126B	TMEM135	CTSC	SLC36A4	RAB38	C11orf82	NOX4	C11orf75	TYR	CHORDC1	GRM5	0.394849
ov.gse9891	chr11q14.1-q14.2	INTS4	CLNS1A	ALG8	PAK1	NARS2	RSF1	KCTD21	USP35	C11orf67	C11orf73	TMEM126B	GAB2	EED	CCDC90B	0.569973
ov.tcga	chr11q13.5-q14.2	ALG8	NDUFC2	NARS2	CLNS1A	PAK1	C11orf30	C11orf67	RSF1	PRKRIR	GAB2	MYO7A	CAPN5	CCDC90B	EED	0.649768
Top genes:	ALG8:5	RSF1:5	CLNS1A:5	NARS2:5	CCDC90B:5	C11orf67:4	NDUFC2:4	GAB2:4	PAK1:4	TMEM126B:4
25	chr5p13.2	6	0.38991
brca.gse2034	chr5p13.3-p13.2	BRIX1	C5orf22	NUP155	DROSHA	TARS	RAD1	GOLPH3	WDR70	NIPBL	SKP2	SUB1	ZFR	MTMR12	C5orf42	0.38991
brca.tcga	chr5p13.3-p13.1	NUP155	BRIX1	RAD1	SKP2	TARS	WDR70	ZFR	PRKAA1	LMBRD2	NADKD1	TTC33	C5orf42	NPR3	RPL37	0.462518
coad.gse14333	chr5p13.3-p13.1	NADKD1	NUP155	BRIX1	RAD1	SKP2	TARS	DNAJC21	NIPBL	SUB1	WDR70	LMBRD2	PRKAA1	RPL37	TTC33	0.566222
coad.tcga	chr5p13.3-p13.2	BRIX1	RAD1	NUP155	WDR70	MTMR12	NADKD1	LMBRD2	TARS	GOLPH3	SUB1	DNAJC21	SKP2	C5orf22	NIPBL	0.527666
ov.gse9891	chr5p13.3-p13.1	RAD1	NIPBL	NADKD1	NUP155	TARS	BRIX1	WDR70	SUB1	DNAJC21	SKP2	PRKAA1	LMBRD2	TTC33	RICTOR	0.4938
ov.tcga	chr5p13.3-p13.2	RAD1	NUP155	C5orf22	WDR70	BRIX1	SUB1	TARS	GOLPH3	ZFR	SKP2	MTMR12	NIPBL	DROSHA	AMACR	0.501973
Top genes:	BRIX1:6	NUP155:6	TARS:6	RAD1:6	WDR70:6	SKP2:6	NIPBL:5	SUB1:5	LMBRD2:4	NADKD1:4
26	chr1p13.2	6	0.389631
brca.gse2034	chr1p13.3-p13.2	CAPZA1	RSBN1	BCAS2	ATP5F1	HIPK1	RAP1A	CSDE1	TRIM33	PHTF1	CEPT1	DCLRE1B	LRIG2	LRIF1	NRAS	0.52385
brca.tcga	chr1p13.2-p12	CSDE1	SIKE1	WDR3	TTF2	NRAS	GDAP2	CD58	BCAS2	AP4B1	LRIG2	DCLRE1B	VANGL1	PTGFRN	MAN1A2	0.389631
coad.gse14333	chr1p13.3-p13.2	RSBN1	AP4B1	ATP5F1	HIPK1	CTTNBP2NL	LRIG2	CAPZA1	DCLRE1B	MAGI3	WDR77	HBXIP	DRAM2	DDX20	CEPT1	0.49053
coad.tcga	chr1p13.3-p13.2	BCAS2	RAP1A	NRAS	CAPZA1	RSBN1	DRAM2	RHOC	ATP5F1	CEPT1	LRIF1	PHTF1	DDX20	ST7L	CSDE1	0.43779
ov.gse9891	chr1p13.2-p13.1	BCAS2	NRAS	TRIM33	CSDE1	DDX20	RSBN1	SIKE1	DCLRE1B	CAPZA1	VANGL1	CTTNBP2NL	LRIG2	MAGI3	HIPK1	0.49646
ov.tcga	chr1p13.2-p13.1	HIPK1	TRIM33	VANGL1	CSDE1	RSBN1	LRIG2	PHTF1	SIKE1	ATP1A1	BCAS2	CAPZA1	NRAS	DCLRE1B	SLC16A1	0.488694
Top genes:	CAPZA1:5	RSBN1:5	BCAS2:5	CSDE1:5	DCLRE1B:5	LRIG2:5	NRAS:5	HIPK1:4	ATP5F1:3	TRIM33:3
27	chr7q34	6	0.387936
brca.gse2034	chr7q33-q34	MKRN1	SSBP1	TRIM24	AGK	LUC7L2	MRPS33	NDUFB2	NUP205	JHDM1D	ADCK2	TTC26	ZC3HAV1	PARP12	BRAF	0.466499
brca.tcga	chr7q33-q34	SSBP1	MRPS33	TRIM24	NDUFB2	MKRN1	BRAF	AGK	KIAA1147	LUC7L2	TTC26	C7orf55	KIAA1549	SLC37A3	ZC3HAV1L	0.387936
coad.gse14333	chr7q34	SLC37A3	MKRN1	MRPS33	GSTK1	SSBP1	ADCK2	AGK	JHDM1D	NDUFB2	LOC100134229	KIAA1147	TMEM139	CASP2	DENND2A	0.439038
coad.tcga	chr7q33-q34	KIAA1549	JHDM1D	KIAA1147	MKRN1	CNOT4	LUC7L2	TRIM24	SLC37A3	HIPK2	ZC3HAV1L	MTPN	BRAF	AKR1D1	NUP205	0.438599
ov.gse9891	chr7q33-q34	SSBP1	MKRN1	AGK	MRPS33	LUC7L2	SLC37A3	TRIM24	KIAA1147	UBN2	NDUFB2	C7orf55	ADCK2	LOC100134713	BRAF	0.490418
ov.tcga	chr7q33-q34	MKRN1	AGK	NUP205	LUC7L2	ADCK2	WDR91	CNOT4	TRIM24	NDUFB2	BRAF	JHDM1D	MRPS33	PARP12	TTC26	0.419939
Top genes:	MKRN1:6	TRIM24:5	AGK:5	LUC7L2:5	MRPS33:5	NDUFB2:5	BRAF:5	SSBP1:4	JHDM1D:4	ADCK2:4
28	chr11p11.2	6	0.38506
brca.gse2034	chr11p11.2	CKAP5	MTCH2	NDUFS3	ARFGAP2	CELF1	NUP160	FNBP4	KBTBD4	C11orf49	ATG13	PHF21A	PACSIN3	PSMC3	ACP2	0.410792
brca.tcga	chr11p11.2	ARFGAP2	ATG13	MADD	PEX16	PSMC3	ZNF408	ACP2	ARHGAP1	CRY2	PACSIN3	C11orf49	CKAP5	TP53I11	MAPK8IP1	0.464862
coad.gse14333	chr11p11.2	CKAP5	PSMC3	CELF1	MTCH2	PTPMT1	ARFGAP2	NUP160	KBTBD4	NDUFS3	C11orf49	AMBRA1	DGKZ	HARBI1	SLC35C1	0.421487
coad.tcga	chr11p11.2	ARFGAP2	AMBRA1	ACP2	MADD	CRY2	ATG13	PSMC3	ZNF408	DGKZ	CKAP5	ARHGAP1	SLC39A13	PACSIN3	PEX16	0.38506
ov.gse9891	chr11p11.2	NDUFS3	PTPMT1	PSMC3	MTCH2	ARFGAP2	ATG13	ZNF408	CELF1	CKAP5	AMBRA1	PEX16	DGKZ	MADD	KBTBD4	0.49574
ov.tcga	chr11p11.2	MTCH2	PSMC3	ATG13	NDUFS3	ARFGAP2	KBTBD4	NUP160	CKAP5	C11orf49	ACP2	ZNF408	AMBRA1	CELF1	NR1H3	0.486415
Top genes:	CKAP5:6	ARFGAP2:6	PSMC3:6	ATG13:5	MTCH2:4	NDUFS3:4	CELF1:4	KBTBD4:4	C11orf49:4	ACP2:4
29	chr7p22.3	6	0.365019
brca.gse2034	chr7p22.3-p22.1	EIF3B	NUDT1	FTSJ2	AIMP2	WIPI2	RAC1	C7orf26	KDELR2	FSCN1	EIF2AK1	ZDHHC4	RNF216	ZNF12	CHST12	0.365019
brca.tcga	chr7p22.3	EIF3B	PSMG3	MAD1L1	BRAT1	FTSJ2	C7orf50	INTS1	SNX8	GET4	HEATR2	PRKAR1B	SUN1	NUDT1	MICALL2	0.505874
coad.gse14333	chr7q27-p22.3	EIF3B	HEATR2	GET4	FTSJ2	BRAT1	NUDT1	C7orf50	IQCE	ADAP1	SNX8	SUN1	LFNG	PRKAR1B	PDCD2	0.564802
coad.tcga	chr7p22.3-p22.1	BRAT1	EIF3B	WIPI2	RNF216	USP42	EIF2AK1	ZNF12	PMS2CL	DAGLB	C7orf26	IQCE	PMS2	RAC1	RBAK	0.509404
ov.gse9891	chr7p22.3	EIF3B	PSMG3	MAD1L1	BRAT1	FTSJ2	GET4	HEATR2	INTS1	C7orf50	SUN1	MAFK	ZFAND2A	SNX8	NUDT1	0.5695
ov.tcga	chr7p22.3-p22.1	FTSJ2	C7orf26	EIF3B	ZNF12	RNF216	EIF2AK1	RAC1	ZDHHC4	PMS2CL	GNA12	WIPI2	KDELR2	CHST12	IQCE	0.561655
Top genes:	EIF3B:6	FTSJ2:5	NUDT1:4	BRAT1:4	WIPI2:3	RAC1:3	C7orf26:3	EIF2AK1:3	RNF216:3	ZNF12:3
30	chr12q13.12	6	0.352194
brca.gse2034	chr12q13.12-q13.12	AQP6	WNT10B	DDN	MLL2	PRPH	WNT1	AQP2	CCNT1	SMARCD1	AQP5	TROAP	GPD1	FAIM2	ADCY6	0.352194
brca.tcga	chr12q13.11-q13.12	TUBA1C	RACGAP1	TUBA1B	TROAP	TUBA1A	SPATS2	RHEBL1	KANSL2	MCRS1	PRPH	DDX23	WNT10B	SMARCD1	KCNH3	0.434364
coad.gse14333	chr12q13.12	LARP4	TMBIM6	DDX23	DNAJC22	RACGAP1	LIMA1	SPATS2	TUBA1B	ATF1	TUBA1C	TROAP	BCDIN3D	PRKAG1	MCRS1	0.450362
coad.tcga	chr12q13.12	TUBA1C	TUBA1B	TUBA1A	LARP4	ARF3	SPATS2	ATF1	RACGAP1	TMBIM6	SMARCD1	RND1	PRKAG1	TROAP	LMBR1L	0.375828
ov.gse9891	chr12q13.12-q13.13	TMBIM6	COX14	LARP4	ATF1	DAZAP2	C12orf44	CERS5	BCDIN3D	DIP2B	CSRNP2	TFCP2	ACVR1B	SLC11A2	SMARCD1	0.484506
ov.tcga	chr12q13.12-q13.13	ATF1	C12orf44	TMBIM6	LARP4	DAZAP2	MCRS1	TFCP2	CSRNP2	SLC11A2	RACGAP1	LETMD1	GALNT6	LIMA1	SMARCD1	0.538663
Top genes:	SMARCD1:5	TROAP:4	RACGAP1:4	LARP4:4	TMBIM6:4	ATF1:4	TUBA1C:3	TUBA1B:3	SPATS2:3	MCRS1:3
31	chr2q31.1	6	0.310813
brca.gse2034	chr2q31.1	DYNC1I2	SLC25A12	HAT1	CYBRD1	METTL5	GORASP2	ATP5G3	TLK1	OLA1	SP3	DLX2	ITGA6	RAPGEF4	DCAF17	0.424675
brca.tcga	chr2q31.1	DLX2	DYNC1I2	CYBRD1	SLC25A12	HAT1	RAPGEF4	PHOSPHO2	ZAK	SCRN3	DLX1	UBR3	BBS5	GAD1	TLK1	0.310813
coad.gse14333	chr2q31.1	SSB	METTL5	METTL8	UBR3	PPIG	HAT1	ATP5G3	FASTKD1	GORASP2	ZAK	PHOSPHO2	SP3	TLK1	KIAA1715	0.451863
coad.tcga	chr2q31.1	BBS5	KBTBD10	KLHL23	CDCA7	PHOSPHO2	ZAK	FASTKD1	RAPGEF4	CIR1	GPR155	OLA1	SSB	DYNC1I2	METAP1D	0.319013
ov.gse9891	chr2q31.1	HOXD1	HOXD-AS1	HOXD3	HOXD4	HOXD8	HOXD-AS2	LOC375295	MTX2	HOXD9	ITGA6	ZAK	ATP5G3	CDCA7	CHRNA1	0.467789
ov.tcga	chr2q31.1-q31.2	HAT1	GORASP2	DYNC1I2	TLK1	NFE2L2	MTX2	DCAF17	OLA1	ATP5G3	SP3	METTL8	PDK1	ATF2	CIR1	0.468586
Top genes:	DYNC1I2:4	HAT1:4	ATP5G3:4	TLK1:4	ZAK:4	GORASP2:3	OLA1:3	SP3:3	RAPGEF4:3	PHOSPHO2:3
32	chr15q26.1	6	0.310645
brca.gse2034	chr15q26.1-q26.3	NGRN	IGF1R	CRTC3	MAN2A2	CIB1	FAM174B	UNC45A	VPS33B	MEF2A	TTC23	IQGAP1	NR2F2	FURIN	BLM	0.310645
brca.tcga	chr15q26.1	BLM	FANCI	C15orf42	PRC1	POLG	RCCD1	IDH2	RHCG	AEN	RLBP1	HAPLN3	ZNF774	MFGE8	ISG20	0.771935
coad.gse14333	chr15q26.1	PRC1	CIB1	RCCD1	POLG	VPS33B	HDDC3	NGRN	IDH2	IQGAP1	ZNF710	LOC100507217	PEX11A	BLM	C15orf38	0.463133
coad.tcga	chr15q26.1	FANCI	C15orf42	PRC1	BLM	POLG	VPS33B	RCCD1	ZNF710	AP3S2	IDH2	UNC45A	CRTC3	MAN2A2	NGRN	0.703279
ov.gse9891	chr15q26.1	FANCI	PRC1	C15orf42	RCCD1	BLM	IDH2	NGRN	VPS33B	POLG	SEMA4B	MAN2A2	PEX11A	HDDC3	UNC45A	0.617339
ov.tcga	chr15q25.3-q26.1	FANCI	PRC1	VPS33B	BLM	CRTC3	IDH2	AP3S2	NGRN	CIB1	UNC45A	MAN2A2	IQGAP1	DET1	FURIN	0.476309
Top genes:	BLM:6	NGRN:5	VPS33B:5	PRC1:5	IDH2:5	MAN2A2:4	UNC45A:4	FANCI:4	POLG:4	RCCD1:4
33	chr17q21.32	5	0.537276
brca.gse2034	chr17q21.32-q21.33	SNF8	UBE2Z	PHB	CALCOCO2	SLC35B1	ATP5G1	KAT7	SPOP	NFE2L1	CBX1	CDK5RAP3	ZNF652	PNPO	SNX11	0.604404
brca.tcga	chr17q21.32-q21.33	SNF8	UBE2Z	PHB	SLC35B1	MRPL27	CALCOCO2	SPOP	KAT7	ATP5G1	XYLT2	PPP1R9B	PDK2	ZNF652	ITGA3	0.597582
coad.gse14333	chr17q21.32	HOXB6	HOXB3	HOXB7	HOXB5	HOXB8	HOXB9	HOXB-AS3	SKAP1	HOXB4	NPEPPS	CBX1	PNPO	SP2	KPNB1	0.537276
coad.tcga	chr17q21.32	HOXB5	HOXB6	HOXB3	HOXB8	HOXB7	HOXB9	SKAP1	HOXB4	HOXB2	TBX21	TBKBP1	HOXB13	B4GALNT2	ABI3	0.710706
ov.gse9891	chr17q21.32-q21.33	HOXB5	HOXB3	HOXB6	HOXB2	HOXB7	HOXB-AS3	HOXB4	HOXB8	HOXB9	SKAP1	CALCOCO2	UBE2Z	NFE2L1	ITGA3	0.587505
ov.tcga	null
Top genes:	UBE2Z:3	CALCOCO2:3	HOXB6:3	HOXB3:3	HOXB7:3	HOXB5:3	HOXB8:3	HOXB9:3	SKAP1:3	HOXB4:3
34	chr19p13.2	5	0.511721
brca.gse2034	chr19p13.2	EIF3G	TYK2	ILF3	MRPL4	KRI1	KEAP1	DNMT1	DNM2	PPAN	FBXL12	QTRT1	AP1M2	ZNF562	CDC37	0.511721
brca.tcga	null
coad.gse14333	chr19p13.2	CDC37	SMARCA4	KEAP1	AP1M2	MRPL4	ATG4D	DNM2	C19orf52	EIF3G	CARM1	PPAN	DNMT1	DOCK6	KRI1	0.545697
coad.tcga	chr19p13.2	SMARCA4	TYK2	ILF3	DNMT1	CDC37	QTRT1	KRI1	EIF3G	AP1M2	DNM2	KEAP1	CARM1	LDLR	ATG4D	0.519935
ov.gse9891	chr19p13.2	MRPL4	CDC37	PIN1	FDX1L	TYK2	UBL5	KEAP1	KRI1	RAVER1	PPAN	EIF3G	FBXL12	DNMT1	ATG4D	0.699945
ov.tcga	chr19p13.2	CDC37	KEAP1	TYK2	KRI1	ILF3	SMARCA4	CARM1	DNMT1	QTRT1	AP1M2	MRPL4	TMED1	PRKCSH	DNM2	0.6708
Top genes:	KRI1:5	KEAP1:5	DNMT1:5	CDC37:5	EIF3G:4	TYK2:4	MRPL4:4	DNM2:4	AP1M2:4	ILF3:3
35	chr7q36.1	5	0.511091
brca.gse2034	null
brca.tcga	chr7q36.1	GIMAP1	GIMAP8	GIMAP4	GIMAP5	GIMAP7	GIMAP6	GIMAP2	TMEM176B	TMEM176A	NOS3	RARRES2	C7orf29	LOC401431	ABP1	0.723924
coad.gse14333	chr7q36.1-q36.2	GIMAP6	GIMAP4	GIMAP8	GIMAP7	GIMAP1	GIMAP2	SMARCD3	LOC285972	LOC100132707	DPP6	WDR86	NUB1	HTR5A	ASB10	0.651374
coad.tcga	chr7q36.1	GIMAP4	GIMAP6	GIMAP5	GIMAP1	GIMAP8	GIMAP7	ZNF467	RARRES2	KRBA1	PDIA4	GIMAP2	ABP1	FASTK	ZNF746	0.682063
ov.gse9891	chr7q36.1	GIMAP4	GIMAP1	GIMAP6	GIMAP7	GIMAP8	GIMAP2	TMEM176B	TMEM176A	LOC285972	RARRES2	C7orf29	SMARCD3	CDK5	ACTR3C	0.807902
ov.tcga	chr7q36.1-q36.3	ABCF2	UBE3C	PAXIP1	FASTK	GALNT11	RHEB	CDK5	SLC4A2	PRKAG2	ACTR3B	INSIG1	KCNH2	XRCC2	NOS3	0.511091
Top genes:	GIMAP1:4	GIMAP8:4	GIMAP4:4	GIMAP7:4	GIMAP6:4	GIMAP2:4	RARRES2:3	GIMAP5:2	TMEM176B:2	TMEM176A:2
36	chr7p15.2	5	0.510669
brca.gse2034	null
brca.tcga	chr7p15.3-p15.2	HOXA5	HOXA7	HOXA9	HOXA4	HOXA3	HOXA2	SKAP2	FAM126A	MPP6	DFNA5	OSBPL3	HOXA6	GPNMB	C7orf31	0.609612
coad.gse14333	chr7p15.3-p15.2	HOXA10	HOXA11-AS	HOXA11	HOXA5	HOXA13	HOXA7	HOXA3	SKAP2	HOXA2	NUPL2	HOXA4	CYCS	CBX3	HNRNPA2B1	0.518217
coad.tcga	chr7p15.3-p15.2	HOXA5	HOXA7	HOXA9	HOXA2	HOXA4	HOXA3	HOXA6	SKAP2	HOXA1	CCDC126	CBX3	MALSU1	MPP6	DFNA5	0.549393
ov.gse9891	chr7p15.3-p15.2	HOXA5	HOTAIRM1	HOXA3	HOXA4	SKAP2	HOXA1	HOXA2	HOXA10	HOXA7	SNX10	GPNMB	FAM126A	HOXA6	HOXA11	0.586796
ov.tcga	chr7p15.3-p15.2	HOXA5	HOXA4	HOXA1	HOXA10	HOXA7	SKAP2	HOXA9	HOXA2	HOXA6	KLHL7	CBX3	MPP6	STEAP1B	SNX10	0.510669
Top genes:	HOXA5:5	HOXA7:5	HOXA4:5	HOXA2:5	SKAP2:5	HOXA3:4	HOXA6:4	HOXA9:3	MPP6:3	HOXA10:3
37	Chr17 – HER2 Amplicon	5	0.509946
brca.gse2034	chr17q12-q21.2	PGAP3	STARD3	ERBB2	PSMD3	GRB7	GSDMB	MED24	CASC3	WIPF2	CDC6	PNMT	RAPGEFL1	RARA	THRA	0.557145
brca.tcga	chr17q12	MIEN1	GRB7	STARD3	PGAP3	ERBB2	TCAP	MED1	CDK12	PNMT	FBXL20	RPL19	PCGF2	PIP4K2B	CWC25	0.66931
coad.gse14333	null
coad.tcga	chr17q12	DDX52	RPL19	CWC25	MRPL45	PIP4K2B	DUSP14	PSMB3	TADA2A	SYNRG	ACACA	RPL23	LASP1	MLLT6	PCGF2	0.544116
ov.gse9891	chr17q12-q21.1	PGAP3	MIEN1	ERBB2	PSMD3	STARD3	GRB7	CWC25	CDK12	FBXL20	PSMB3	LASP1	MED1	PIP4K2B	GSDMB	0.542247
ov.tcga	chr17q12-q21.1	ERBB2	PGAP3	PSMD3	STARD3	MED24	GRB7	PNMT	PIP4K2B	MED1	GSDMB	THRA	TCAP	LASP1	CWC25	0.509946
Top genes:	PGAP3:4	STARD3:4	ERBB2:4	GRB7:4	PIP4K2B:4	CWC25:4	PSMD3:3	GSDMB:3	PNMT:3	MED1:3
38	chr17p13.3	5	0.494195
brca.gse2034	chr17p13.3-p13.2	OR1A2	OR1D2	OR1G1	OR1A1	P2RX1	OR3A3	OR1D5	OR3A1	OR3A2	SHPK	TRPV1	SGSM2	ASPA	SERPINF2	0.494195
brca.tcga	chr17p13.3	TIMM22	RNMTL1	GLOD4	GEMIN4	PRPF8	YWHAE	CRK	VPS53	ABR	PITPNA	FAM57A	INPP5K	MYO1C	WDR81	0.523585
coad.gse14333	chr17p13.3	GEMIN4	GLOD4	RNMTL1	PRPF8	RPA1	FAM57A	PITPNA	YWHAE	CRK	TIMM22	ABR	LOC100306951	INPP5K	RPH3AL	0.638559
coad.tcga	chr17p13.3	RNMTL1	GEMIN4	GLOD4	RPA1	TSR1	YWHAE	TIMM22	CRK	PRPF8	PITPNA	FAM57A	ABR	WDR81	SRR	0.594442
ov.gse9891	null
ov.tcga	chr17p13.3	PAFAH1B1	GLOD4	CRK	RPA1	PRPF8	PITPNA	GEMIN4	RNMTL1	YWHAE	FAM57A	TIMM22	INPP5K	SGSM2	MNT	0.602077
Top genes:	TIMM22:4	RNMTL1:4	GLOD4:4	GEMIN4:4	PRPF8:4	YWHAE:4	CRK:4	PITPNA:4	FAM57A:4	ABR:3
39	chr19p13.3	5	0.492485
brca.gse2034	chr19p13.3	POLR2E	BSG	GPX4	PPAP2C	PTBP1	RNF126	SBNO2	STK11	CDC34	GAMT	NDUFS7	WDR18	C19orf6	MED16	0.536081
brca.tcga	chr19p13.3	STK11	FAM108A1	C19orf25	C19orf6	MED16	C19orf24	NDUFS7	WDR18	SCAMP4	KLF16	MBD3	ABCA7	ADAT3	ATP5D	0.550312
coad.gse14333	null
coad.tcga	chr19p13.3	C19orf25	ADAT3	C19orf24	STK11	KLF16	WDR18	RPS15	FAM108A1	POLR2E	C19orf26	NDUFS7	KISS1R	CIRBP-AS1	ATP5D	0.492485
ov.gse9891	chr19p13.3	RNF126	ATP5D	MED16	POLRMT	R3HDM4	POLR2E	SBNO2	PTBP1	STK11	TPGS1	MIER2	C19orf6	GPX4	WDR18	0.554918
ov.tcga	chr19p13.3	R3HDM4	NDUFS7	RNF126	ATP5D	POLR2E	POLRMT	BSG	MBD3	MED16	C19orf24	GPX4	RPS15	DAZAP1	WDR18	0.501085
Top genes:	WDR18:5	POLR2E:4	STK11:4	NDUFS7:4	MED16:4	ATP5D:4	GPX4:3	RNF126:3	C19orf6:3	C19orf24:3
40	chr19q13.12	5	0.487328
brca.gse2034	chr19q13.12	ARHGAP33	GAPDHS	PRODH2	WDR62	FFAR3	NPHS1	ZBTB32	ATP4A	ETV2	CLIP3	HAUS5	MLL4	APLP1	HSPB6	0.487328
brca.tcga	null
coad.gse14333	chr19q13.12	LIN37	PSENEN	POLR2I	RBM42	SDHAF1	COX6B1	ALKBH6	LRFN3	ZNF567	ZNF565	ZNF146	ETV2	WDR62	ZBTB32	0.521527
coad.tcga	chr19q13.12	ZNF345	ZNF567	ZNF585A	ZNF527	HKR1	ZNF383	ZNF420	ZNF790	ZNF568	ZNF461	ZNF829	ZNF566	ZFP14	TBCB	0.576634
ov.gse9891	chr19q13.12	TBCB	RBM42	POLR2I	COX6B1	TMEM147	SDHAF1	THAP8	ALKBH6	MLL4	LIN37	U2AF1L4	ZNF146	ZNF565	CAPNS1	0.66952
ov.tcga	chr19q13.12	POLR2I	RBM42	PSENEN	TBCB	TMEM147	COX6B1	LIN37	CAPNS1	HAUS5	USF2	ZNF146	LRFN3	IGFLR1	CLIP3	0.589826
Top genes:	LIN37:3	POLR2I:3	RBM42:3	COX6B1:3	ZNF146:3	TBCB:3	WDR62:2	ZBTB32:2	ETV2:2	CLIP3:2
41	chr4q35.1	5	0.485156
brca.gse2034	null
brca.tcga	chr4q34.1-q35.1	TRAPPC11	KIAA1430	RWDD4	ING2	CDKN2AIP	CCDC111	FBXO8	UFSP2	DCTD	SNX25	SLC25A4	CEP44	AGA	CCDC110	0.504567
coad.gse14333	chr4q34.3-q35.2	TRAPPC11	CASP3	ING2	RWDD4	DCTD	CDKN2AIP	CCDC111	UFSP2	SLC25A4	MLF1IP	KIAA1430	AGA	KLKB1	SNX25	0.515274
coad.tcga	chr4q34.1-q35.1	CDKN2AIP	DCTD	RWDD4	SLC25A4	FBXO8	ING2	UFSP2	TRAPPC11	CCDC111	CASP3	SPCS3	MLF1IP	KIAA1430	ANKRD37	0.485156
ov.gse9891	chr4q33-q35.1	TRAPPC11	RWDD4	CDKN2AIP	CEP44	ING2	C4orf27	CASP3	CCDC111	FBXO8	DCTD	AGA	MLF1IP	SAP30	WWC2	0.507045
ov.tcga	chr4q35.1-q35.2	UFSP2	SLC25A4	CDKN2AIP	FRG1	CASP3	TRAPPC11	ING2	ACSL1	MLF1IP	IRF2	TLR3	FAT1	LRP2BP	PDLIM3	0.555859
Top genes:	TRAPPC11:5	ING2:5	CDKN2AIP:5	RWDD4:4	CCDC111:4	UFSP2:4	DCTD:4	SLC25A4:4	CASP3:4	MLF1IP:4
42	chr19q13.31	5	0.482661
brca.gse2034	null
brca.tcga	chr19q13.31	ZNF155	ZNF223	ZNF230	ZNF45	ZNF222	ZNF227	ZNF224	ZNF226	ZNF283	ZNF225	ZNF284	ZNF233	XRCC1	ZNF404	0.650305
coad.gse14333	chr19q13.31	ZNF227	ZNF45	ZNF180	ZNF226	ZNF230	ZNF234	ZFP112	ZNF223	ZNF283	ZNF224	ZNF222	IRGQ	ZNF576	SMG9	0.482661
coad.tcga	chr19q13.31	ZNF227	ZNF155	ZFP112	ZNF223	ZNF45	ZNF180	ZNF224	ZNF235	ZNF226	ZNF230	ZNF222	ZNF284	ZNF225	ZNF283	0.54658
ov.gse9891	chr19q13.31	ZNF45	ZNF227	ZNF222	ZNF230	ZFP112	ZNF223	ZNF226	ZNF234	ZNF225	ZNF224	ZNF235	ZNF283	ZNF285	LOC100505715	0.658931
ov.tcga	chr19q13.31	ZNF45	ZNF230	ZNF222	ZNF223	ZNF227	ZFP112	ZNF235	ZNF576	XRCC1	ZNF224	ZNF225	ZNF155	ZNF428	SMG9	0.650583
Top genes:	ZNF223:5	ZNF230:5	ZNF45:5	ZNF222:5	ZNF227:5	ZNF224:5	ZNF226:4	ZNF283:4	ZNF225:4	ZFP112:4
43	chr10p13	5	0.481522
brca.gse2034	chr10p14-p13	CDC123	SEPHS1	ATP5C1	HSPA14	KIN	UPF2	RPP38	MCM10	USP6NL	PRPF18	DHTKD1	OPTN	DCLRE1C	NMT2	0.551249
brca.tcga	chr10p14-p13	SUV39H2	SEPHS1	MCM10	NUDT5	HSPA14	CDC123	USP6NL	RPP38	PRPF18	DCLRE1C	DHTKD1	KIN	UPF2	ATP5C1	0.56139
coad.gse14333	chr10p13-p12.31	CDC123	NUDT5	HSPA14	SUV39H2	MCM10	RPP38	STAM	SEPHS1	PRPF18	ARL5B	TRDMT1	PTER	RSU1	FAM188A	0.553761
coad.tcga	null
ov.gse9891	chr10p14-p13	CDC123	NUDT5	SUV39H2	DCLRE1C	KIN	DHTKD1	HSPA14	SEPHS1	PRPF18	UPF2	MCM10	SEC61A2	RPP38	ATP5C1	0.482265
ov.tcga	chr10p14-p13	CDC123	RPP38	SEPHS1	HSPA14	KIN	USP6NL	MCM10	PRPF18	NMT2	DCLRE1C	SEC61A2	DHTKD1	FAM188A	ATP5C1	0.481522
Top genes:	CDC123:5	SEPHS1:5	HSPA14:5	RPP38:5	MCM10:5	PRPF18:5	ATP5C1:4	KIN:4	DHTKD1:4	DCLRE1C:4
44	chr17q21.31	5	0.480755
brca.gse2034	chr17q21.2-q21.31	CCDC56	COASY	FAM134C	TUBG1	PSME3	AARSD1	BECN1	DNAJC7	MLX	TUBG2	RAB5C	KAT2A	IFI35	EZH1	0.480755
brca.tcga	chr17q21.2-q21.31	CCDC56	COASY	FAM134C	VPS25	BECN1	GHDC	TUBG2	RAB5C	NAGLU	PLEKHH3	ATP6V0A1	TUBG1	LEPREL4	MLX	0.589518
coad.gse14333	chr17q21.2-q21.31	LSM12	TUBG1	DHX8	VPS25	PSME3	BECN1	RUNDC1	CCDC56	BRCA1	TMEM101	G6PC3	AARSD1	FAM134C	NBR1	0.492521
coad.tcga	null
ov.gse9891	chr17q21.2-q21.31	DHX8	PSME3	BECN1	CCDC56	VPS25	TUBG1	G6PC3	NBR1	RUNDC1	LSM12	DUSP3	EZH1	RPL27	TUBG2	0.606391
ov.tcga	chr17q21.2-q21.31	PSME3	TUBG1	RAB5C	MLX	DHX8	BECN1	NBR1	AARSD1	CCDC56	COASY	FAM134C	STAT3	IFI35	NAGLU	0.52233
Top genes:	CCDC56:5	TUBG1:5	BECN1:5	FAM134C:4	PSME3:4	COASY:3	AARSD1:3	MLX:3	TUBG2:3	RAB5C:3
45	chr19q13.42	5	0.46506
brca.gse2034	null
brca.tcga	chr19q13.42	LAIR1	LILRB1	LILRB4	LILRB3	LILRA3	LILRP2	LILRA1	LILRA5	LILRA4	OSCAR	LILRB5	LAIR2	LILRA2	LILRB2	0.620557
coad.gse14333	chr19q13.42	LILRA4	CACNG8	CACNG7	LENG1	LILRA1	LILRB5	LILRB4	LILRP2	OSCAR	LILRA2	CACNG6	LILRA3	LAIR1	LILRB2	0.465745
coad.tcga	chr19q13.42	LILRB1	LILRA3	LILRB3	LILRA5	LAIR1	LILRA2	LILRA1	LILRP2	LILRB5	LILRB4	LILRA4	LILRB2	FCAR	KIR2DL4	0.680962
ov.gse9891	chr19q13.42	TSEN34	MBOAT7	PRPF31	TFPT	NDUFA3	CNOT3	LENG1	MYADM	TMC4	LILRA3	RPS9	OSCAR	CACNG6	CACNG7	0.493276
ov.tcga	chr19q13.42	PRPF31	TSEN34	MBOAT7	TFPT	CNOT3	NDUFA3	RPS9	TTYH1	LAIR1	LILRB3	LILRB4	LILRB1	LAIR2	LILRB2	0.46506
Top genes:	LAIR1:4	LILRB4:4	LILRA3:4	LILRB2:4	LILRB1:3	LILRB3:3	LILRP2:3	LILRA1:3	LILRA4:3	OSCAR:3
46	chr1q21.3	5	0.460852
brca.gse2034	chr1q21.3	PRUNE	PSMD4	SETDB1	VPS72	ENSA	PI4KB	POGZ	CERS2	RPRD2	GOLPH3L	SNX27	PSMB4	TARS2	MRPL9	0.472385
brca.tcga	chr1q21.3-q21.3	SCNM1	MRPL9	VPS72	PSMB4	PIP5K1A	SETDB1	PSMD4	PRPF3	PI4KB	TARS2	POGZ	ZNF687	SNX27	RPRD2	0.460852
coad.gse14333	chr1q21.3	VPS72	PSMB4	MRPL9	PSMD4	PI4KB	TUFT1	POGZ	TDRKH	RFX5	CGN	THEM4	S100A10	C1orf56	PIP5K1A	0.526991
coad.tcga	null
ov.gse9891	chr1q21.3	PSMD4	PSMB4	VPS72	MRPL9	PI4KB	PRUNE	ARNT	SETDB1	SNX27	ENSA	TARS2	RPRD2	POGZ	CERS2	0.633349
ov.tcga	chr1q21.3	VPS72	PRUNE	ENSA	SCNM1	MRPL9	SETDB1	PSMB4	PI4KB	PSMD4	TARS2	CERS2	GOLPH3L	ARNT	PIP5K1A	0.572726
Top genes:	PSMD4:5	VPS72:5	PI4KB:5	PSMB4:5	MRPL9:5	SETDB1:4	POGZ:4	TARS2:4	PRUNE:3	ENSA:3
47	chr8p21.3	5	0.459366
brca.gse2034	chr8p21.3	SFTPC	PIWIL2	SORBS3	TNFRSF10C	GFRA2	EPB49	TNFRSF10D	PHYHIP	FGF17	HR	RHOBTB2	FLJ14107	LZTS1	BMP1	0.459366
brca.tcga	chr8p21.3-p21.2	CHMP7	POLR3D	BIN3	XPO7	TNFRSF10A	ENTPD4	TNFRSF10B	KIAA1967	SLC25A37	C8orf58	SLC39A14	REEP4	EPB49	FAM160B2	0.539995
coad.gse14333	chr8p21.3-p21.1	CHMP7	PBK	TNFRSF10A	KCTD9	PPP2R2A	ELP3	BIN3	CDCA2	CCDC25	R3HCC1	TNFRSF10B	ESCO2	SLC25A37	ENTPD4	0.604722
coad.tcga	chr8p21.3-p21.1	TNFRSF10A	CHMP7	CDCA2	PBK	TNFRSF10B	KIAA1967	ESCO2	PPP2R2A	ENTPD4	BIN3	TNFRSF10D	CCDC25	DOCK5	KCTD9	0.587653
ov.gse9891	null
ov.tcga	chr8p21.3-p21.2	BIN3	CHMP7	ENTPD4	FAM160B2	TNFRSF10B	REEP4	POLR3D	XPO7	SLC25A37	SLC39A14	RHOBTB2	SORBS3	PPP3CC	BMP1	0.488802
Top genes:	CHMP7:4	BIN3:4	ENTPD4:4	TNFRSF10B:4	TNFRSF10A:3	SLC25A37:3	SORBS3:2	EPB49:2	TNFRSF10D:2	RHOBTB2:2
48	chr1p36.33	5	0.449518
brca.gse2034	chr1p36.33-p36.32	AURKAIP1	MRPL20	PANK4	DVL1	CDK11A	PRKCZ	RER1	GLTPD1	NADK	CPSF3L	GNB1	PEX10	ATAD3A	TNFRSF14	0.452922
brca.tcga	chr1p36.33	GLTPD1	CPSF3L	AURKAIP1	DVL1	SDF4	ACAP3	ATAD3A	UBE2J2	ATAD3B	PUSL1	MRPL20	NADK	SSU72	MIB2	0.561615
coad.gse14333	chr1p36.33-p36.32	AURKAIP1	UBE2J2	MRPL20	RER1	PANK4	CPSF3L	SDF4	NADK	GLTPD1	SSU72	PEX10	GNB1	PRKCZ	LOC148413	0.556756
coad.tcga	chr1p36.33	NOC2L	DVL1	CPSF3L	ATAD3A	NADK	CDK11A	SDF4	B3GALT6	UBE2J2	ATAD3B	PUSL1	C1orf159	GLTPD1	AURKAIP1	0.449518
ov.gse9891	chr1p36.33	AURKAIP1	NOC2L	GLTPD1	UBE2J2	SSU72	ATAD3B	ATAD3A	NADK	MRPL20	SDF4	CPSF3L	PUSL1	MIB2	B3GALT6	0.591477
ov.tcga	null
Top genes:	AURKAIP1:5	GLTPD1:5	NADK:5	CPSF3L:5	MRPL20:4	ATAD3A:4	SDF4:4	UBE2J2:4	DVL1:3	ATAD3B:3
49	chr15q22.31	5	0.44653
brca.gse2034	null
brca.tcga	chr15q22.31	C15orf44	TRIP4	DPP8	RAB11A	CLPX	MAP2K1	DIS3L	DENND4A	PARP16	USP3	HERC1	SNX1	MTFMT	PDCD7	0.53227
coad.gse14333	chr15q22.31-q23	ZWILCH	CLPX	TIPIN	MAP2K1	PTPLAD1	RAB11A	MTFMT	AAGAB	C15orf44	SPG21	DENND4A	TRIP4	RPL4	PDCD7	0.542511
coad.tcga	chr15q22.31-q23	MAP2K1	RPL4	DPP8	CLPX	PTPLAD1	RAB11A	DENND4A	TIPIN	PDCD7	DIS3L	C15orf44	CLN6	SPG21	MTFMT	0.44653
ov.gse9891	chr15q22.31	C15orf44	FAM96A	RAB11A	SNX1	CLPX	MAP2K1	DPP8	SPG21	CSNK1G1	SNAPC5	USP3	DIS3L	DENND4A	ZNF609	0.516215
ov.tcga	chr15q22.31	C15orf44	RAB11A	SNX1	OAZ2	PTPLAD1	CLPX	SPG21	DPP8	TRIP4	USP3	HERC1	PARP16	KIAA0101	SLC24A1	0.589127
Top genes:	C15orf44:5	RAB11A:5	CLPX:5	DPP8:4	MAP2K1:4	DENND4A:4	SPG21:4	TRIP4:3	DIS3L:3	USP3:3
50	chr19p13.2	5	0.446357
brca.gse2034	chr19p13.2-p13.12	RAD23A	FARSA	C19orf53	STX10	TRMT1	CC2D1A	TNPO2	ASNA1	GADD45GIP1	DHPS	GCDH	DNASE2	RNASEH2A	CALR	0.461332
brca.tcga	null
coad.gse14333	chr19p13.2	FARSA	RNASEH2A	C19orf43	ASNA1	RAD23A	C19orf53	GCDH	PRDX2	TRMT1	NACC1	DNASE2	TNPO2	GADD45GIP1	DHPS	0.490372
coad.tcga	chr19p13.2-p13.12	RNASEH2A	FARSA	GADD45GIP1	ASF1B	TRMT1	DDX39A	STX10	RAD23A	GCDH	C19orf53	CC2D1A	PRDX2	ASNA1	PRKACA	0.446357
ov.gse9891	chr19p13.2	FARSA	C19orf43	GADD45GIP1	ASNA1	RAD23A	GCDH	WDR83OS	TNPO2	STX10	TRMT1	DHPS	FBXW9	HOOK2	WDR83	0.639588
ov.tcga	chr19p13.2	FARSA	RAD23A	GCDH	STX10	ASNA1	DHPS	GADD45GIP1	WDR83OS	TRMT1	PRDX2	RNASEH2A	DNASE2	C19orf53	TNPO2	0.60175
Top genes:	RAD23A:5	FARSA:5	TRMT1:5	ASNA1:5	GADD45GIP1:5	GCDH:5	C19orf53:4	STX10:4	TNPO2:4	DHPS:4
51	chr17p13.2	5	0.443756
brca.gse2034	null
brca.tcga	chr17p13.2	RNF167	SLC25A11	PSMB6	SPAG7	MED11	EMC6	CTNS	CYB5D2	SHPK	PELP1	MYBBP1A	UBE2G1	ITGAE	PFN1	0.443756
coad.gse14333	chr17p13.2-p13.1	C1QBP	PSMB6	SLC25A11	MIS12	NUP88	ZNF232	PFN1	DERL2	RPAIN	TXNDC17	SPAG7	FAM64A	DHX33	RABEP1	0.538756
coad.tcga	chr17p13.2-p13.1	MIS12	C1QBP	ZNF232	MED11	MED31	SLC25A11	DERL2	RPAIN	SPAG7	PSMB6	NUP88	RABEP1	PFN1	FAM64A	0.468816
ov.gse9891	chr17p13.2	EMC6	PSMB6	MED11	SLC25A11	UBE2G1	ITGAE	PELP1	C17orf85	CTNS	ANKFY1	PFN1	ZZEF1	RNF167	MYBBP1A	0.536566
ov.tcga	chr17p13.2	MIS12	DERL2	C1QBP	PSMB6	UBE2G1	NUP88	SLC25A11	ZNF232	RNF167	PFN1	PELP1	SPAG7	ARRB2	MYBBP1A	0.594166
Top genes:	SLC25A11:5	PSMB6:5	PFN1:5	SPAG7:4	RNF167:3	MED11:3	PELP1:3	MYBBP1A:3	UBE2G1:3	C1QBP:3
52	chr4q31.21	5	0.436011
brca.gse2034	chr4q31.1-q31.3	GYPB	GYPA	CCRN4L	MAB21L2	GAB1	POU4F2	GYPE	UCP1	RPS3A	ARHGAP10	OTUD4	TBC1D9	LRBA	RAB33B	0.436011
brca.tcga	null
coad.gse14333	chr4q28.1-q31.21	ZNF330	USP38	SMARCA5	NAA15	LARP1B	SCOC	ELMOD2	NDUFC1	PLK4	SPATA5	PGRMC2	NUDT6	SLC7A11	HSPA4L	0.524306
coad.tcga	chr4q28.1-q31.21	ANAPC10	C4orf33	C4orf29	MFSD8	ELMOD2	SCOC	MGST2	LARP1B	ZNF330	ABCE1	PGRMC2	INTU	NDUFC1	IL15	0.444132
ov.gse9891	chr4q31.1-q31.23	USP38	ANAPC10	ABCE1	SMARCA5	LSM6	TMEM184C	PRMT10	ELMOD2	SLC10A7	SMAD1	SCOC	ZNF330	MMAA	OTUD4	0.48933
ov.tcga	chr4q31.1-q31.3	ABCE1	ANAPC10	NAA15	LSM6	ZNF330	SMARCA5	OTUD4	SMAD1	TMEM184C	TBC1D9	LRBA	MGST2	RPS3A	RAB33B	0.543286
Top genes:	ZNF330:4	OTUD4:3	SMARCA5:3	SCOC:3	ELMOD2:3	ANAPC10:3	ABCE1:3	RPS3A:2	TBC1D9:2	LRBA:2
53	chr16p13.3	5	0.435471
brca.gse2034	chr16p13.3-p13.2	NAA60	ROGDI	USP7	ABAT	MGRN1	ADCY9	ZNF500	CLUAP1	METTL22	DNAJA3	PMM2	CREBBP	TMEM186	TRAP1	0.435471
brca.tcga	chr16p13.3	ZNF174	ZNF263	ZNF434	NAA60	ZNF213	CLUAP1	FLYWCH1	PDPK1	MGC3771	ZNF75A	FLYWCH2	ZNF597	ZNF200	THOC6	0.497824
coad.gse14333	chr16p13.3-p13.2	TRAP1	ALG1	DNAJA3	TMEM186	PMM2	NMRAL1	HMOX2	MGRN1	USP7	CORO7	CREBBP	ANKS3	GLYR1	NAGPA	0.481713
coad.tcga	chr16p13.3-p13.2	UBN1	MGRN1	USP7	CREBBP	DNAJA3	ANKS3	ZNF500	SLX4	DNASE1	C16orf72	PMM2	CORO7	TFAP4	NAGPA	0.4764
ov.gse9891	chr16p13.3	ZNF500	MGRN1	NUDT16L1	NMRAL1	ANKS3	DNAJA3	VASN	HMOX2	FAM100A	ZNF263	CREBBP	NAA60	TRAP1	ROGDI	0.50752
ov.tcga	null
Top genes:	MGRN1:4	DNAJA3:4	CREBBP:4	NAA60:3	USP7:3	ZNF500:3	PMM2:3	TRAP1:3	ANKS3:3	ROGDI:2
54	chr19q13.2	5	0.419566
brca.gse2034	chr19q13.2	MAP3K10	AKT2	SAMD4B	PRX	DYRK1B	CNTD2	SPTBN4	CLC	LGALS14	LTBP4	DLL3	LGALS13	ZNF780B	ITPKC	0.495446
brca.tcga	chr19q13.2	TIMM50	MRPS12	SUPT5H	SARS2	SAMD4B	PSMC4	FBL	RPS16	SIRT2	PAK4	NFKBIB	ACTN4	PAF1	ECH1	0.419566
coad.gse14333	chr19q13.2	MRPS12	TIMM50	PSMC4	PAF1	FBL	RPS16	SARS2	MED29	PAK4	EID2	ZNF780A	AKT2	DYRK1B	SUPT5H	0.429475
coad.tcga	null
ov.gse9891	chr19q13.2	PAF1	MED29	EID2	TIMM50	SUPT5H	PSMC4	PAK4	SAMD4B	RPS16	PLEKHG2	EID2B	SARS2	ECH1	FBL	0.700005
ov.tcga	chr19q13.12-q13.2	PSMD8	ECH1	MRPS12	PAK4	EIF3K	NFKBIB	SARS2	SIRT2	ACTN4	RYR1	SPINT2	SIPA1L3	ZNF571	ZFP30	0.628846
Top genes:	SARS2:4	PAK4:4	SAMD4B:3	TIMM50:3	MRPS12:3	SUPT5H:3	PSMC4:3	FBL:3	RPS16:3	PAF1:3
55	chr1p35.1	5	0.419148
brca.gse2034	chr1p35.2-p35.1	RBBP4	TXLNA	PEF1	PUM1	EIF3I	SNRNP40	KPNA6	BAI2	KHDRBS1	PTP4A2	HDAC1	MARCKSL1	BSDC1	AK2	0.467583
brca.tcga	chr1p35.3-p35.1	KPNA6	EIF3I	BSDC1	TXLNA	HDAC1	TMEM234	PEF1	IQCC	MARCKSL1	ZCCHC17	TMEM39B	MECR	PUM1	ZBTB8OS	0.419148
coad.gse14333	chr1p35.2-p35.1	EIF3I	HDAC1	AK2	TXLNA	RBBP4	YARS	ZBTB8OS	SNRNP40	PTP4A2	KPNA6	PEF1	BSDC1	KIAA1522	TMEM54	0.542055
coad.tcga	null
ov.gse9891	chr1p35.2-p35.1	HDAC1	PEF1	KPNA6	TXLNA	BSDC1	EIF3I	ZBTB8OS	TMEM39B	PTP4A2	KIAA1522	AK2	TMEM234	YARS	RBBP4	0.611203
ov.tcga	chr1p35.3-p35.1	KPNA6	TXLNA	PEF1	TMEM39B	PTP4A2	EIF3I	SRSF4	PUM1	TAF12	SNRNP40	YTHDF2	MECR	SDC3	KHDRBS1	0.535144
Top genes:	TXLNA:5	PEF1:5	EIF3I:5	KPNA6:5	PTP4A2:4	HDAC1:4	BSDC1:4	RBBP4:3	PUM1:3	SNRNP40:3
56	chr20p11.23	5	0.417729
brca.gse2034	chr20p12.2-p11.23	CRNKL1	SEC23B	DSTN	MKKS	TASP1	KIF16B	OVOL2	SNRPB2	POLR3F	RIN2	ZNF133	BTBD3	ANKRD5	SLC24A3	0.417729
brca.tcga	chr20p11.23-p11.21	CRNKL1	SEC23B	POLR3F	XRN2	NAA20	CSRP2BP	DZANK1	RBBP9	GZF1	PLK1S1	NAPB	C20orf26	OVOL2	SLC24A3	0.431749
coad.gse14333	null
coad.tcga	chr20p12.2-p11.23	POLR3F	SNRPB2	NAA20	CRNKL1	MKKS	SNX5	TASP1	DSTN	C20orf72	NDUFAF5	ZNF133	CSRP2BP	ESF1	SEC23B	0.612062
ov.gse9891	chr20p12.1-p11.23	POLR3F	ZNF133	CRNKL1	LINC00493	C20orf72	SNRPB2	SEC23B	PET117	NDUFAF5	SNX5	ESF1	LOC100270804	NAA20	TASP1	0.504543
ov.tcga	chr20p12.2-p11.23	POLR3F	CRNKL1	ZNF133	SEC23B	SNRPB2	DSTN	SNX5	MKKS	TASP1	DZANK1	BTBD3	RIN2	KIF16B	ESF1	0.552202
Top genes:	CRNKL1:5	SEC23B:5	POLR3F:5	TASP1:4	SNRPB2:4	ZNF133:4	DSTN:3	MKKS:3	NAA20:3	SNX5:3
57	chr1p36.13	5	0.416381
brca.gse2034	chr1p36.21-p36.13	CLCNKB	PADI1	RSG1	CTRC	PAX7	PADI4	CELA2A	CROCCP3	CELA2B	PADI3	ACTL8	C1orf144	CASP9	HSPB7	0.477402
brca.tcga	null
coad.gse14333	chr1p36.21-p36.13	MRTO4	SDHB	EMC1	C1orf144	RCC2	PQLC2	AKR7A2	CAPZB	SPEN	IFFO2	UBR4	EPHA2	ATP13A2	ARHGEF10L	0.545369
coad.tcga	chr1p36.13	AKR7L	AKR7A2	AKR7A3	C1orf144	NECAP2	NBL1	CAPZB	FBXO42	EMC1	SDHB	RSG1	EPHA2	ATP13A2	MINOS1	0.416381
ov.gse9891	chr1p36.21-p36.13	FBXO42	PLEKHM2	EMC1	RCC2	C1orf144	ATP13A2	ZBTB17	SPEN	SDHB	NECAP2	UBR4	FLJ37453	ARHGEF19	CROCC	0.490766
ov.tcga	chr1p36.13-p36.12	EMC1	MRTO4	DDOST	MUL1	SDHB	AKR7A2	PINK1	CAPZB	AKR7A3	UBR4	ATP13A2	ALDH4A1	OTUD3	MFAP2	0.530471
Top genes:	C1orf144:4	SDHB:4	EMC1:4	ATP13A2:4	AKR7A2:3	CAPZB:3	UBR4:3	RSG1:2	MRTO4:2	RCC2:2
58	chrXp11.23	5	0.416175
brca.gse2034	null
brca.tcga	chrXp11.23	SUV39H1	OTUD5	GRIPAP1	ELK1	FTSJ1	TFE3	SLC35A2	PRICKLE3	ARAF	TIMM17B	WDR13	TBC1D25	CCDC120	PQBP1	0.416175
coad.gse14333	chrXp11.23	CCDC22	TIMM17B	GPKOW	FTSJ1	PQBP1	EBP	SUV39H1	PLP2	WDR13	SLC35A2	GRIPAP1	GLOD5	OTUD5	TFE3	0.55018
coad.tcga	chrXp11.23	OTUD5	SLC35A2	GPKOW	GRIPAP1	WDR13	CCDC22	WDR45	PQBP1	TFE3	SUV39H1	CCDC120	HDAC6	PLP2	PRICKLE3	0.455709
ov.gse9891	chrXp11.23	OTUD5	TIMM17B	SUV39H1	HDAC6	GRIPAP1	SLC35A2	CCDC22	TFE3	GPKOW	PQBP1	WDR45	PRICKLE3	PRAF2	WDR13	0.658618
ov.tcga	chrXp11.23	GPKOW	TIMM17B	CCDC22	SLC35A2	WDR45	TFE3	PQBP1	SUV39H1	PRAF2	PRICKLE3	HDAC6	PLP2	KCND1	PIM2	0.665044
Top genes:	SUV39H1:5	TFE3:5	SLC35A2:5	PQBP1:5	OTUD5:4	GRIPAP1:4	PRICKLE3:4	TIMM17B:4	WDR13:4	CCDC22:4
59	chr12q13.13	5	0.412843
brca.gse2034	chr12q13.13	AMHR2	KRT2	KRT1	RARG	KRT85	KRT84	KRT76	SOAT2	SP1	KRT83	KRT75	AAAS	KRT4	KRT3	0.492506
brca.tcga	chr12q13.13	C12orf10	ATP5G2	PRR13	MFSD5	COPZ1	PFDN5	SMUG1	CSAD	MAP3K12	SPRYD3	TENC1	TARBP2	PCBP2	CALCOCO1	0.548938
coad.gse14333	null
coad.tcga	chr12q13.13-q13.2	GPR84	MMP19	ITGA5	NCKAP1L	ZNF385A	CD63	PDE1B	SARNP	TESPA1	NFE2	MUCL1	ITGA7	DNAJC14	COPZ1	0.434809
ov.gse9891	chr12q13.13	C12orf10	ATP5G2	PFDN5	TARBP2	EIF4B	AAAS	MAP3K12	ZNF740	PCBP2	SMUG1	CALCOCO1	KRT8	SP1	KRT18	0.412843
ov.tcga	chr12q13.13	TARBP2	PCBP2	C12orf10	ATP5G2	SMUG1	AAAS	HNRNPA1	PRR13	HOXC4	MAP3K12	PFDN5	COPZ1	CALCOCO1	HOXC5	0.457494
Top genes:	AAAS:3	C12orf10:3	ATP5G2:3	COPZ1:3	PFDN5:3	SMUG1:3	MAP3K12:3	TARBP2:3	PCBP2:3	CALCOCO1:3
60	chr22q13.33	5	0.404241
brca.gse2034	chr22q13.33-p25.3	ACR	MAPK11	MAPK8IP2	ADM2	NCAPH2	CAV3	LMF2	ARSA	IL5RA	SBF1	GRM7	PPP6R2	CNTN6	C3orf32	0.463776
brca.tcga	chr22q13.31-q13.33	CRELD2	SCO2	TBC1D22A	TRABD	SBF1	NCAPH2	TUBGCP6	ALG12	ZBED4	PLXNB2	LMF2	PIM3	PPP6R2	ADM2	0.404241
coad.gse14333	null
coad.tcga	chr22q13.31-q13.33	SBF1	BRD1	PPARA	ZBED4	PLXNB2	TTC38	TUBGCP6	PIM3	TBC1D22A	ALG12	CRELD2	PPP6R2	CERK	TRMU	0.492918
ov.gse9891	chr22q13.31-q13.33	SCO2	TUBGCP6	SELO	LMF2	PLXNB2	TBC1D22A	PIM3	ODF3B	SBF1	FAM116B	TRABD	CHKB	CPT1B	CRELD2	0.517099
ov.tcga	chr22q13.31-q13.33	LMF2	CRELD2	SCO2	PLXNB2	TBC1D22A	PPP6R2	ALG12	NCAPH2	TRABD	BRD1	SBF1	TTC38	ZBED4	TRMU	0.455719
Top genes:	SBF1:5	LMF2:4	PPP6R2:4	CRELD2:4	TBC1D22A:4	PLXNB2:4	NCAPH2:3	SCO2:3	TRABD:3	TUBGCP6:3
61	chr5q35.3	5	0.40311
brca.gse2034	chr5q35.3	HNRNPAB	DDX41	MGAT4B	CANX	NHP2	DBN1	LMAN2	HNRNPH1	B4GALT7	RMND5B	MAML1	RUFY1	ZNF354A	GRK6	0.40311
brca.tcga	chr5q35.2-q35.3	B4GALT7	LMAN2	DDX41	PRELID1	RMND5B	TSPAN17	NHP2	RAB24	CLTB	N4BP3	ZNF346	AGXT2L2	RGS14	HIGD2A	0.476862
coad.gse14333	null
coad.tcga	chr5q35.3	TBC1D9B	HNRNPAB	MAML1	RUFY1	MGAT4B	TMED9	DDX41	CANX	RMND5B	MAPK9	GRK6	AGXT2L2	FAM193B	SQSTM1	0.425212
ov.gse9891	chr5q35.2-q35.3	PRELID1	DDX41	NHP2	NOP16	HNRNPAB	GRK6	TSPAN17	LMAN2	RMND5B	HIGD2A	RNF44	B4GALT7	FAF2	CLTB	0.52565
ov.tcga	chr5q35.2-q35.3	DDX41	FAF2	NOP16	UIMC1	GRK6	NHP2	LMAN2	HIGD2A	B4GALT7	RMND5B	CLTB	RNF44	TMED9	NSD1	0.487327
Top genes:	DDX41:5	RMND5B:5	NHP2:4	LMAN2:4	B4GALT7:4	GRK6:4	HNRNPAB:3	CLTB:3	HIGD2A:3	MGAT4B:2
62	chr3q27.1	5	0.398655
brca.gse2034	chr3q27.1-q27.3	ECE2	MASP1	KNG1	HRG	AHSG	SST	FETUB	THPO	DGKG	CLCN2	CHRD	MAP3K13	EPHB3	SENP2	0.428275
brca.tcga	chr3q26.33-q27.2	AP2M1	EIF4G1	PSMD2	DVL3	EIF2B5	ABCF3	VPS8	PARL	FAM131A	ALG3	ACTL6A	MFN1	FXR1	POLR2H	0.398655
coad.gse14333	chr3q26.33-q27.1	ALG3	EIF4G1	ABCF3	PSMD2	EIF2B5	YEATS2	MRPL47	POLR2H	ACTL6A	ECE2	PARL	AP2M1	FXR1	DCUN1D1	0.616535
coad.tcga	null
ov.gse9891	chr3q26.33-q27.2	PSMD2	ABCF3	SENP2	POLR2H	DVL3	PARL	ALG3	AP2M1	YEATS2	MAGEF1	DNAJC19	MCCC1	EIF4G1	EIF2B5	0.596984
ov.tcga	chr3q26.33-q27.2	PSMD2	VPS8	FAM131A	ALG3	ABCF3	EIF2B5	DVL3	AP2M1	EIF4G1	MAGEF1	POLR2H	PARL	YEATS2	DCUN1D1	0.554716
Top genes:	AP2M1:4	EIF4G1:4	PSMD2:4	EIF2B5:4	ABCF3:4	PARL:4	ALG3:4	POLR2H:4	DVL3:3	YEATS2:3
63	chr11p13	5	0.397301
brca.gse2034	chr11p13-p12	FBXO3	EIF3M	PDHX	APIP	ELP4	TRIM44	COMMD9	DNAJC24	NAT10	CD59	CAT	CSTF3	TRAF6	CAPRIN1	0.466824
brca.tcga	chr11p14.1-p13	CAPRIN1	C11orf46	PDHX	FBXO3	APIP	EIF3M	TRIM44	QSER1	CCDC34	DNAJC24	LIN7C	NAT10	METTL15	CSTF3	0.460409
coad.gse14333	null
coad.tcga	chr11p14.1-p13	DNAJC24	C11orf46	KIF18A	ELP4	CAPRIN1	PDHX	EIF3M	IMMP1L	LIN7C	FBXO3	CSTF3	CCDC34	METTL15	DCDC5	0.397301
ov.gse9891	chr11p13-p11.2	NAT10	TRIM44	PDHX	CAPRIN1	CSTF3	TRAF6	APIP	FBXO3	COMMD9	API5	ALKBH3	CAT	C11orf74	FJX1	0.543057
ov.tcga	chr11p14.1-p13	FBXO3	ELP4	APIP	PDHX	CAPRIN1	CAT	CD59	LIN7C	EIF3M	NAT10	DNAJC24	CSTF3	RCN1	CD44	0.539789
Top genes:	FBXO3:5	PDHX:5	CSTF3:5	CAPRIN1:5	EIF3M:4	APIP:4	DNAJC24:4	NAT10:4	ELP4:3	TRIM44:3
64	chr11p15.5	5	0.393511
brca.gse2034	chr11p15.5	CD151	DEAF1	RNH1	POLR2L	AP2A2	PNPLA2	TOLLIP	TSPAN4	RASSF7	HRAS	CTSD	SLC25A22	DUSP8	PTDSS2	0.393511
brca.tcga	null
coad.gse14333	chr11p15.5	TALDO1	PSMD13	PHRF1	PKP3	TOLLIP	AP2A2	EPS8L2	RNH1	PTDSS2	RASSF7	RPLP2	HRAS	CD151	POLR2L	0.464344
coad.tcga	chr11p15.5	PKP3	PHRF1	ANO9	RIC8A	EPS8L2	RNH1	CD151	PDDC1	PTDSS2	SIRT3	IFITM1	LRRC56	PNPLA2	NS3BP	0.408458
ov.gse9891	chr11p15.5	SIGIRR	POLR2L	CD151	MOB2	RASSF7	EPS8L2	TOLLIP	SLC25A22	PKP3	HRAS	ANO9	RNH1	PTDSS2	PDDC1	0.525274
ov.tcga	chr11p15.5	RNH1	EPS8L2	DEAF1	TALDO1	RASSF7	SIGIRR	AP2A2	PKP3	CD151	HRAS	SLC25A22	TMEM80	PSMD13	TOLLIP	0.478667
Top genes:	CD151:5	RNH1:5	TOLLIP:4	RASSF7:4	HRAS:4	PTDSS2:4	PKP3:4	EPS8L2:4	POLR2L:3	AP2A2:3
65	chr21q22.11	5	0.392741
brca.gse2034	null
brca.tcga	chr21q22.11-q22.2	DONSON	CHAF1B	PSMG1	GART	DSCR3	HMGN1	MRPS6	DYRK1A	ATP5O	HLCS	SETD4	DSCR9	CBR1	CBR3	0.392741
coad.gse14333	chr21q22.11-q22.12	MIS18A	GART	DONSON	C21orf59	SOD1	SON	ATP5O	CBR1	MRPS6	CRYZL1	GCFC1	SCAF4	SYNJ1	SETD4	0.488881
coad.tcga	chr21q22.11-q22.12	TMEM50B	CRYZL1	ATP5O	MRPS6	C21orf119	FAM165B	SOD1	IFNAR1	DNAJC28	C21orf59	OLIG1	IL10RB	FAM176C	RCAN1	0.441231
ov.gse9891	chr21q22.11	SON	MRPS6	SOD1	CRYZL1	C21orf59	SLC5A3	URB1	GART	ATP5O	SCAF4	IFNAR1	GCFC1	IL10RB	IFNGR2	0.432216
ov.tcga	chr21q22.11	SON	C21orf59	GART	MIS18A	GCFC1	SOD1	URB1	DONSON	TMEM50B	IL10RB	IFNAR1	IFNGR2	SYNJ1	TIAM1	0.492863
Top genes:	GART:4	MRPS6:4	ATP5O:4	C21orf59:4	SOD1:4	DONSON:3	SON:3	CRYZL1:3	GCFC1:3	IFNAR1:3
66	chr1p32.3	5	0.392269
brca.gse2034	null
brca.tcga	chr1p32.3	ORC1	PRPF38A	FAF1	TMEM48	MRPL37	SELRC1	NRD1	BTF3L4	KTI12	LRP8	LRRC42	ZCCHC11	HSPB11	CC2D1B	0.468569
coad.gse14333	chr1p32.3	TMEM48	MRPL37	ORC1	DHCR24	PRPF38A	KTI12	MAGOH	LRP8	CPT2	SELRC1	PCSK9	LRRC42	USP24	SCP2	0.520264
coad.tcga	chr1p32.3	BTF3L4	C1orf123	LRRC42	TMEM59	TXNDC12	YIPF1	HSPB11	KTI12	RNF11	SELRC1	SCP2	TMEM48	PRPF38A	FAF1	0.392269
ov.gse9891	chr1p32.3	PRPF38A	MAGOH	MRPL37	LRRC42	TMEM48	ZYG11B	SELRC1	PARS2	ORC1	USP24	HSPB11	CPT2	C1orf123	TCEANC2	0.551351
ov.tcga	chr1p32.3-p32.1	LRRC42	TTC4	YIPF1	HSPB11	MAGOH	CPT2	C1orf123	TMEM59	TMEM48	USP24	SSBP3	LRP8	DHCR24	FGGY	0.533249
Top genes:	TMEM48:5	LRRC42:5	PRPF38A:4	SELRC1:4	HSPB11:4	ORC1:3	MRPL37:3	KTI12:3	LRP8:3	MAGOH:3
67	chr2p23.3	5	0.388767
brca.gse2034	null
brca.tcga	chr2p23.3	NRBP1	PPM1G	GTF3C2	TMEM214	SNX17	EIF2B4	PREB	CAD	ZNF513	RAB10	MPV17	HADHA	AGBL5	SLC5A6	0.489334
coad.gse14333	chr2p23.3-p23.3	PPM1G	PREB	EPT1	CAD	GTF3C2	CENPA	SLC4A1AP	EIF2B4	SNX17	HADHA	KHK	SLC5A6	SUPT7L	C2orf28	0.516602
coad.tcga	chr2p23.3-p23.2	C2orf28	GPN1	MPV17	MRPL33	CCDC121	ABHD1	AGBL5	CCDC164	SLC5A6	GPR113	KRTCAP3	TRIM54	KHK	IFT172	0.388767
ov.gse9891	chr2p23.3-p23.2	GTF3C2	GPN1	C2orf28	SNX17	OST4	EIF2B4	PREB	SLC4A1AP	BRE	MPV17	NRBP1	CAD	AGBL5	SLC5A6	0.496888
ov.tcga	chr2p23.3-p23.2	MPV17	GPN1	SNX17	PREB	EIF2B4	C2orf28	AGBL5	SLC4A1AP	PPM1G	SUPT7L	CAD	GTF3C2	SLC5A6	MRPL33	0.570166
Top genes:	SLC5A6:5	GTF3C2:4	SNX17:4	EIF2B4:4	PREB:4	CAD:4	MPV17:4	AGBL5:4	C2orf28:4	PPM1G:3
68	chr1p34.3	5	0.382824
brca.gse2034	chr1p34.3-p34.2	UTP11L	GNL2	TRIT1	C1orf109	SF3A3	RRAGC	NDUFS5	YRDC	CDCA8	PPIE	MRPS15	SNIP1	MYCBP	PABPC4	0.433642
brca.tcga	chr1p34.3-p34.2	UTP11L	GNL2	TRIT1	SF3A3	CDCA8	RRAGC	C1orf109	NDUFS5	AKIRIN1	STK40	YRDC	RHBDL2	INPP5B	MRPS15	0.382824
coad.gse14333	chr1p34.3-p34.2	GNL2	UTP11L	YRDC	C1orf109	MRPS15	PPIE	SNIP1	CDCA8	MYCBP	RLF	C1orf122	AKIRIN1	SF3A3	NDUFS5	0.573033
coad.tcga	chr1p34.3	TRAPPC3	MRPS15	C1orf212	LSM10	PSMB2	ADPRHL2	SNIP1	ZMYM6	YRDC	ZMYM1	CDCA8	C1orf109	C1orf122	MEAF6	0.438088
ov.gse9891	chr1p34.3	UTP11L	GNL2	MEAF6	C1orf109	SNIP1	YRDC	MTF1	SF3A3	INPP5B	ADPRHL2	C1orf122	MRPS15	CDCA8	LSM10	0.715082
ov.tcga	null
Top genes:	C1orf109:5	YRDC:5	CDCA8:5	MRPS15:5	UTP11L:4	GNL2:4	SF3A3:4	SNIP1:4	NDUFS5:3	C1orf122:3
69	chr19q13.33	5	0.382228
brca.gse2034	chr19q13.33	PTOV1	NUP62	TBC1D17	PRMT1	NR1H2	VRK3	PNKP	ATF5	IRF3	RRAS	ZNF473	PRRG2	FUZ	MYH14	0.479811
brca.tcga	null
coad.gse14333	chr19q13.33	IRF3	PRMT1	ALDH16A1	AKT1S1	ZNF473	NOSIP	NUP62	VRK3	PTOV1	PRRG2	PNKP	BCL2L12	AP2A1	MED25	0.492812
coad.tcga	chr19q13.33	AKT1S1	PTOV1	SCAF1	MED25	AP2A1	IRF3	PNKP	NR1H2	VRK3	NUP62	PRMT1	PRR12	ZNF473	MYH14	0.382228
ov.gse9891	chr19q13.33	PIH1D1	NOSIP	PNKP	IRF3	NUP62	PTOV1	PRR12	BCL2L12	MED25	PRMT1	ALDH16A1	AKT1S1	TBC1D17	TEAD2	0.502636
ov.tcga	chr19q13.33	PNKP	VRK3	NUP62	POLD1	ZNF473	IRF3	PRMT1	NR1H2	TBC1D17	PTOV1	MED25	ATF5	FUZ	MYH14	0.47302
Top genes:	PTOV1:5	NUP62:5	PRMT1:5	PNKP:5	IRF3:5	VRK3:4	ZNF473:4	MED25:4	TBC1D17:3	NR1H2:3
70	chr2q33.1	5	0.378566
brca.gse2034	chr2q33.1-q33.2	C2orf47	NIF3L1	NDUFB3	HSPE1	WDR12	ORC2	COQ10B	SUMO1	BZW1	SPATS2L	HSPD1	FZD7	BMPR2	CFLAR	0.378566
brca.tcga	null
coad.gse14333	chr2q32.3-q33.1	HSPE1	C2orf47	NIF3L1	SGOL2	HSPD1	C2orf69	GTF3C3	ORC2	BZW1	MARS2	TYW5	MYO1B	CCDC150	NDUFB3	0.583263
coad.tcga	chr2q33.1-q33.2	NIF3L1	C2orf47	WDR12	MOB4	TYW5	SGOL2	NDUFB3	PPIL3	ORC2	MARS2	TMEM237	C2orf69	ABI2	BZW1	0.439047
ov.gse9891	chr2q33.1-q33.2	ORC2	WDR12	NIF3L1	C2orf47	FAM117B	TYW5	NOP58	HSPE1	BZW1	NDUFB3	ALS2	SGOL2	MARS2	FAM126B	0.505837
ov.tcga	chr2q33.1-q33.2	C2orf47	MOB4	BZW1	SUMO1	NIF3L1	ORC2	WDR12	NDUFB3	ABI2	CYP20A1	TRAK2	CASP8	CFLAR	BMPR2	0.637099
Top genes:	C2orf47:5	NIF3L1:5	NDUFB3:5	ORC2:5	BZW1:5	WDR12:4	HSPE1:3	SGOL2:3	MARS2:3	TYW5:3
71	chr1q32.1	5	0.374986
brca.gse2034	chr1q32.1	MYBPH	CNTN2	KISS1	MYOG	LOC730227	KLHDC8A	TMCC2	ELK4	REN	MDM4	ADORA1	CHIT1	DSTYK	PLEKHA6	0.41579
brca.tcga	chr1q31.3-q32.1	PKP1	LAD1	ASPM	KIF14	TNNT2	C1orf106	IPO9	KIF21B	ELF3	CAMSAP2	ARL8A	CFHR4	TIMM17A	GPR37L1	0.432435
coad.gse14333	chr1q32.1	LMOD1	CSRP1	ATP2B4	PPP1R12B	PRELP	PHLDA3	NAV1	FMOD	CYB5R1	BTG2	CHI3L1	SHISA4	CHIT1	KDM5B	0.466347
coad.tcga	null
ov.gse9891	chr1q32.1	UBE2T	KLHL12	TMEM9	TIMM17A	RABIF	IPO9	KDM5B-AS1	KDM5B	ARL8A	ADIPOR1	DDX59	CAMSAP2	PPFIA4	RNPEP	0.374986
ov.tcga	chr1q32.1	ZC3H11A	KDM5B	RBBP5	ATP2B4	DSTYK	SOX13	ADIPOR1	FMOD	LRRN2	NUAK2	PIK3C2B	KLHL12	PRELP	LINC00260	0.455244
Top genes:	KDM5B:3	CHIT1:2	DSTYK:2	IPO9:2	CAMSAP2:2	ARL8A:2	TIMM17A:2	ATP2B4:2	PRELP:2	FMOD:2
72	chr18q21.1	5	0.363479
brca.gse2034	chr18q12.1-q21.1	C18orf25	SLC14A2	DTNA	TCEB3B	RIT2	ST8SIA5	PIAS2	SLC14A1	ZNF24	ZBTB7C	MOCOS	RPRD1A	SETBP1	SLC39A6	0.363479
brca.tcga	chr18q12.3-q21.1	SMAD2	ATP5A1	DYM	IER3IP1	C18orf25	PIK3C3	PIAS2	MBD1	HAUS1	EPG5	HDHD2	C18orf32	CXXC1	ACAA2	0.50113
coad.gse14333	chr18q12.2-q21.1	DYM	C18orf21	ELP2	ATP5A1	HAUS1	RPRD1A	SMAD2	PIK3C3	IER3IP1	SLC39A6	C18orf25	TPGS2	PIAS2	MOCOS	0.554962
coad.tcga	chr18q12.2-q21.1	C18orf25	ATP5A1	ELP2	DYM	PIK3C3	SMAD2	ZNF24	TPGS2	C18orf21	SLC39A6	PIAS2	HAUS1	HDHD2	RPRD1A	0.60211
ov.gse9891	chr18q12.2-q21.1	HDHD2	DYM	EPG5	PIK3C3	SMAD2	IER3IP1	ATP5A1	HAUS1	PIAS2	TPGS2	SMAD7	C18orf25	ACAA2	MYO5B	0.566003
ov.tcga	null
Top genes:	C18orf25:5	PIAS2:5	SMAD2:4	ATP5A1:4	DYM:4	PIK3C3:4	HAUS1:4	RPRD1A:3	SLC39A6:3	IER3IP1:3
73	chr12q24.33	5	0.358461
brca.gse2034	chr12q24.33	ZNF84	ZNF268	GOLGA3	ZNF140	EP400	NOC4L	ZNF10	CHFR	ANKLE2	PUS1	SFSWAP	ULK1	POLE	PXMP2	0.358461
brca.tcga	chr12q24.31-q24.33	PUS1	EP400	NOC4L	POLE	DDX51	DHX37	CHFR	GOLGA3	EP400NL	BRI3BP	ULK1	SFSWAP	ZNF26	ANKLE2	0.422423
coad.gse14333	null
coad.tcga	chr12q24.31-q24.33	EP400	DHX37	PUS1	NCOR2	GOLGA3	POLE	SFSWAP	DDX51	ULK1	ZNF664	AACS	ANKLE2	SCARB1	BRI3BP	0.501064
ov.gse9891	chr12q24.31-q24.33	EP400	ZNF605	FBRSL1	SFSWAP	DDX51	RAN	PUS1	POLE	GOLGA3	ANKLE2	PXMP2	NOC4L	ULK1	DHX37	0.537655
ov.tcga	chr12q24.33	EP400	SFSWAP	ULK1	ZNF84	GOLGA3	ZNF26	ANKLE2	PUS1	POLE	CHFR	NOC4L	ZNF140	ZNF10	PXMP2	0.528673
Top genes:	GOLGA3:5	EP400:5	ANKLE2:5	PUS1:5	SFSWAP:5	ULK1:5	POLE:5	NOC4L:4	CHFR:3	PXMP2:3
74	chr2q11.2	5	0.352543
brca.gse2034	chr2q11.2	REV1	UNC50	TXNDC9	LIPT1	COX5B	STARD7	TMEM131	EIF5B	CIAO1	TMEM127	SNRNP200	LMAN2L	SEMA4C	CNNM3	0.352543
brca.tcga	chr2q11.2	C2orf55	TSGA10	COA5	LONRF2	KANSL3	C2orf15	AFF3	CNNM4	LMAN2L	UNC50	TMEM127	LIPT1	CHST10	CNNM3	0.363161
coad.gse14333	chr2q11.1-q11.2	SNRNP200	ANKRD39	NCAPH	CIAO1	MRPS5	COX5B	STARD7	CNNM4	CNNM3	ITPRIPL1	ACTR1B	LMAN2L	TMEM131	KANSL3	0.426644
coad.tcga	null
ov.gse9891	chr2q11.2	COA5	CIAO1	UNC50	MITD1	STARD7	EIF5B	MRPL30	ANKRD39	SNRNP200	INPP4A	TXNDC9	KANSL3	TMEM127	LMAN2L	0.453096
ov.tcga	chr2q11.2-q12.1	TMEM131	REV1	UNC50	LIPT1	PDCL3	TXNDC9	EIF5B	CHST10	MAP4K4	INPP4A	RPL31	MGAT4A	IL1R1	SLC9A2	0.425492
Top genes:	UNC50:4	LMAN2L:4	TXNDC9:3	LIPT1:3	STARD7:3	TMEM131:3	EIF5B:3	CIAO1:3	TMEM127:3	SNRNP200:3
75	chr16q13	4	0.718507
brca.gse2034	chr16q12.2-q21	MT1H	MT1X	MT1G	MT2A	MT1F	MT1E	CSNK2A2	NUP93	CIAPIN1	C16orf80	COQ9	GINS3	POLR2C	GPR56	0.718507
brca.tcga	chr16q12.2-q21	MT1H	MT1B	MT2A	MT1G	MT1X	MT1JP	MT1M	MT1E	CX3CL1	POLR2C	OGFOD1	NUDT21	LPCAT2	CCL17	0.814048
coad.gse14333	chr16q12.2-q21	MT1H	MT1G	MT1X	MT2A	MT1E	MT1F	HERPUD1	PLLP	NLRC5	KIFC3	ARL2BP	CX3CL1	CCL17	GPR97	0.806349
coad.tcga	null
ov.gse9891	chr16q12.2-q21	MT1G	MT1H	MT2A	MT1X	MT1F	MT1E	NLRC5	MT3	OGFOD1	GPR56	CX3CL1	ARL2BP	SLC12A3	HERPUD1	0.810821
ov.tcga	null
Top genes:	MT1H:4	MT1X:4	MT1G:4	MT2A:4	MT1E:4	MT1F:3	CX3CL1:3	POLR2C:2	GPR56:2	OGFOD1:2
76	chr17q11.2	4	0.532541
brca.gse2034	chr17q11.2	SUPT6H	ERAL1	KIAA0100	TRAF4	SDF2	SPAG5	POLDIP2	TNFAIP1	FLOT2	UNC119	NLK	TMEM97	IFT20	ALDOC	0.598207
brca.tcga	chr17q11.2	SUPT6H	SDF2	POLDIP2	ERAL1	TMEM199	KIAA0100	FLOT2	PIGS	UNC119	RPL23A	TRAF4	NEK8	IFT20	SLC46A1	0.532541
coad.gse14333	null
coad.tcga	null
ov.gse9891	chr17q11.2	ERAL1	SUPT6H	SDF2	POLDIP2	PIGS	TMEM199	FAM222B	RAB34	TNFAIP1	IFT20	NLK	KIAA0100	SARM1	SPAG5	0.563174
ov.tcga	chr17q11.2	SUPT6H	KIAA0100	FLOT2	FAM222B	ERAL1	UNC119	SDF2	TRAF4	SPAG5	SARM1	ALDOC	GIT1	FOXN1	PIPOX	0.564665
Top genes:	SUPT6H:4	ERAL1:4	KIAA0100:4	SDF2:4	TRAF4:3	SPAG5:3	POLDIP2:3	FLOT2:3	UNC119:3	IFT20:3
77	chr19p13.3	4	0.512149
brca.gse2034	null
brca.tcga	null
coad.gse14333	chr19p13.3	CLPP	LONP1	FEM1A	DUS3L	SAFB	GTF2F1	UHRF1	C19orf10	RANBP3	SAFB2	RPL36	PRR22	MLLT1	HDGFRP2	0.522338
coad.tcga	chr19p13.3	KHSRP	SAFB	LONP1	MLLT1	RANBP3	GTF2F1	SAFB2	CLPP	KDM4B	UHRF1	TICAM1	SH2D3A	FUT5	FUT6	0.563496
ov.gse9891	chr19p13.3	SH2D3A	NDUFA11	GPR108	CLPP	GTF2F1	TRIP10	ALKBH7	C19orf70	RANBP3	DUS3L	SLC25A23	KHSRP	CRB3	RPL36	0.54242
ov.tcga	chr19p13.3-p13.2	GTF2F1	KHSRP	TRIP10	LONP1	ARHGEF18	CLPP	RANBP3	SH2D3A	SLC25A23	VAV1	INSR	RPL36	ZNF557	DENND1C	0.512149
Top genes:	CLPP:4	GTF2F1:4	RANBP3:4	LONP1:3	RPL36:3	KHSRP:3	SH2D3A:3	DUS3L:2	SAFB:2	UHRF1:2
78	chr20q13.31	4	0.505815
brca.gse2034	chr20q13.13-q13.32	RAE1	RAB22A	DPM1	C20orf43	PFDN4	CSTF1	AURKA	VAPB	ZFP64	TFAP2C	ZNF217	ADNP	ATP9A	CEBPB	0.505815
brca.tcga	chr20q13.2-q13.33	RAE1	VAPB	RAB22A	STX16	SLMO2	TH1L	C20orf43	CSTF1	ATP5E	AURKA	NPEPL1	FAM217B	PPP1R3D	FAM210B	0.57111
coad.gse14333	null
coad.tcga	null
ov.gse9891	chr20q13.2-q13.33	RAE1	TH1L	CSTF1	RAB22A	C20orf43	SLMO2	VAPB	FAM217B	RBM38	GNAS	STX16	GNAS-AS1	PPP1R3D	SYCP2	0.568252
ov.tcga	chr20q13.13-q13.31	C20orf43	CSTF1	ZFP64	CSE1L	STAU1	DPM1	RNF114	ADNP	SPATA2	PTPN1	ARFGEF2	DDX27	AURKA	B4GALT5	0.53712
Top genes:	C20orf43:4	CSTF1:4	RAE1:3	RAB22A:3	AURKA:3	VAPB:3	DPM1:2	ZFP64:2	ADNP:2	STX16:2
79	chr7q22.1	4	0.491487
brca.gse2034	null
brca.tcga	chr7q22.1	ZNHIT1	ALKBH4	PRKRIP1	SLC12A9	PPP1R35	GIGYF1	POP7	TSC22D4	FBXO24	MEPCE	GNB2	MOSPD3	AGFG2	TRIM56	0.504311
coad.gse14333	chr7q22.1-q22.3	ARMC10	ORC5	RINT1	DNAJC2	PMPCB	PUS7	PSMC2	ALKBH4	LRWD1	SRPK2	MLL5	NAPEPLD	FIS1	SYPL1	0.595982
coad.tcga	chr7q22.1	PRKRIP1	DNAJC2	LRWD1	CUX1	PLOD3	ALKBH4	TRIM56	ORAI2	POLR2J2	PMPCB	FAM185A	SPDYE2	SRRT	ZNHIT1	0.491487
ov.gse9891	chr7q22.1-q22.3	DNAJC2	ARMC10	PMPCB	ORC5	RINT1	PUS7	NAPEPLD	MLL5	PSMC2	SYPL1	SRPK2	ATXN7L1	ALKBH4	LOC100216546	0.558386
ov.tcga	null
Top genes:	ALKBH4:4	DNAJC2:3	PMPCB:3	ZNHIT1:2	PRKRIP1:2	TRIM56:2	ARMC10:2	ORC5:2	RINT1:2	PUS7:2
80	chr22q12.2	4	0.488668
brca.gse2034	null
brca.tcga	chr22q12.1-q12.2	PES1	AP1B1	NIPSNAP1	NF2	THOC5	ASCC2	EWSR1	GAS2L1	ZMAT5	SF3A1	TBC1D10A	MTMR3	MTFP1	PITPNB	0.488668
coad.gse14333	null
coad.tcga	chr22q12.2	AP1B1	EWSR1	NF2	PES1	ASCC2	SF3A1	THOC5	RNF185	MTMR3	NIPSNAP1	GAS2L1	SMTN	MORC2	RNF215	0.547806
ov.gse9891	chr22q12.2	RNF185	DRG1	UQCR10	ASCC2	PES1	ZMAT5	AP1B1	TUG1	SF3A1	MTMR3	MTFP1	NF2	GAS2L1	LIMK2	0.596391
ov.tcga	chr22q12.2	PES1	ZMAT5	UQCR10	ASCC2	SF3A1	NIPSNAP1	THOC5	MTMR3	AP1B1	TUG1	INPP5J	NF2	GAS2L1	EWSR1	0.59256
Top genes:	PES1:4	AP1B1:4	NF2:4	ASCC2:4	GAS2L1:4	SF3A1:4	MTMR3:4	NIPSNAP1:3	THOC5:3	EWSR1:3
81	chr22q12.3	4	0.484038
brca.gse2034	null
brca.tcga	chr22q12.2-q12.3	APOL1	APOL2	APOL3	APOL6	APOL4	NCF4	CSF2RB	YWHAH	PIK3IP1	HMOX1	TOM1	MYH9	LIMK2	C22orf28	0.606782
coad.gse14333	chr22q12.3-q13.1	CSF2RB	IL2RB	NCF4	RAC2	CYTH4	APOL1	LGALS1	GGA1	C1QTNF6	MFNG	MAFF	CDC42EP1	MYH9	APOL2	0.484038
coad.tcga	chr22q12.3-q13.1	APOL2	APOL4	APOL3	IL2RB	APOL1	APOL6	CYTH4	RAC2	CDC42EP1	MICALL1	RBFOX2	MFNG	NCF4	MYH9	0.614486
ov.gse9891	chr22q12.3-q13.1	NCF4	IL2RB	CSF2RB	APOL3	RAC2	APOL6	CYTH4	APOL1	HMOX1	APOL2	MFNG	MYH9	TOM1	LGALS2	0.639885
ov.tcga	null
Top genes:	APOL1:4	APOL2:4	NCF4:4	MYH9:4	APOL3:3	APOL6:3	CSF2RB:3	IL2RB:3	RAC2:3	CYTH4:3
82	chr12p13.31	4	0.483626
brca.gse2034	chr12p13.31	CD163	CLEC4A	CLEC2B	C3AR1	KLRB1	CD69	SLC2A3	A2M	CLEC2D	MFAP5	KLRF1	KLRG1	M6PR	AICDA	0.483626
brca.tcga	chr12p13.31-p13.2	CD69	KLRB1	CLEC4A	CLECL1	CLEC4E	KLRG1	CLEC2B	C3AR1	CLEC12A	KLRF1	CLEC4C	SLC2A3	CLEC2D	CLEC4D	0.52099
coad.gse14333	null
coad.tcga	chr12p13.31-p13.2	CLEC4A	CLEC4E	C3AR1	KLRD1	CLEC12A	CLEC7A	CD69	CLEC4D	CLEC2B	OLR1	CLEC1A	SLC2A3	MFAP5	SLC2A14	0.563918
ov.gse9891	chr12p13.31-p13.2	C3AR1	CLEC4A	OLR1	CD69	CLEC7A	CLEC2B	KLRB1	KLRD1	A2M	CLECL1	CLEC4E	C12orf59	CLEC12A	CLEC1A	0.538905
ov.tcga	null
Top genes:	CLEC4A:4	CLEC2B:4	C3AR1:4	CD69:4	KLRB1:3	SLC2A3:3	CLEC4E:3	CLEC12A:3	A2M:2	CLEC2D:2
83	chr14q24.3	4	0.483379
brca.gse2034	null
brca.tcga	chr14q24.3-q31.1	SAMD15	IFT43	ALKBH1	GSTZ1	KIAA1737	SNW1	SPTLC2	POMT2	SEL1L	C14orf1	TTLL5	TGFB3	STON2	SLIRP	0.51636
coad.gse14333	null
coad.tcga	chr14q24.2-q24.3	DNAL1	ISCA2	NPC2	ZNF410	MED6	COX16	COQ6	NUMB	PSEN1	C14orf45	ABCD4	ACOT2	KIAA0317	PNMA1	0.504085
ov.gse9891	chr14q24.3	AHSA1	SNW1	SLIRP	ANGEL1	EIF2B2	TTLL5	ALKBH1	IFT43	SPTLC2	C14orf1	FCF1	MLH3	YLPM1	DLST	0.483379
ov.tcga	chr14q24.3	EIF2B2	C14orf1	TMED10	ALKBH1	C14orf133	DLST	AHSA1	FCF1	ANGEL1	ABCD4	SPTLC2	KIAA0317	MLH3	YLPM1	0.584173
Top genes:	ALKBH1:3	SPTLC2:3	C14orf1:3	IFT43:2	SNW1:2	TTLL5:2	SLIRP:2	ABCD4:2	KIAA0317:2	AHSA1:2
84	chr1p22.2	4	0.4815
brca.gse2034	null
brca.tcga	chr1p31.1-p22.2	GBP1	GBP5	GBP4	IFI44L	IFI44	MCOLN2	GBP2	GBP6	LMO4	GBP3	SH3GLB1	GBP7	PRKACB	CYR61	0.568545
coad.gse14333	chr1p31.1-p22.2	GTF2B	USP33	RPF1	SEP15	ZZZ3	PKN2	BCL10	CTBS	FUBP1	ZNHIT6	HS2ST1	SH3GLB1	FAM73A	DDAH1	0.540184
coad.tcga	chr1p31.1-p22.2	GBP4	GBP1	GBP5	IFI44L	IFI44	GBP2	LMO4	ELTD1	PKN2	GTF2B	GBP3	SEP15	CTBS	SH3GLB1	0.503036
ov.gse9891	chr1p31.1-p22.2	GBP1	IFI44	GBP4	IFI44L	GBP2	GBP5	SH3GLB1	GBP3	MCOLN2	GNG5	CTBS	BCL10	RPF1	LMO4	0.4815
ov.tcga	null
Top genes:	SH3GLB1:4	GBP1:3	GBP5:3	GBP4:3	IFI44L:3	IFI44:3	GBP2:3	LMO4:3	GBP3:3	CTBS:3
85	chr13q14.11	4	0.4793
brca.gse2034	null
brca.tcga	chr13q14.11-q14.13	WBP4	MRPS31	MTRF1	KIAA1704	AKAP11	GTF2F2	NAA16	KBTBD7	COG6	NUFIP1	SLC25A15	TPT1	ELF1	CCDC122	0.4793
coad.gse14333	null
coad.tcga	chr13q13.3-q14.13	MRPS31	GTF2F2	KIAA1704	NUFIP1	AKAP11	MTRF1	WBP4	SLC25A15	PROSER1	ELF1	NAA16	SUGT1P3	COG6	DNAJC15	0.59206
ov.gse9891	chr13q13.3-q14.13	WBP4	KBTBD7	KIAA1704	KBTBD6	NAA16	FAM48A	NUFIP1	COG6	MTRF1	PROSER1	MRPS31	AKAP11	KIAA0564	GTF2F2	0.569176
ov.tcga	chr13q13.1-q14.11	MRPS31	EXOSC8	PDS5B	UFM1	WBP4	FAM48A	MTRF1	RFC3	SLC25A15	ALG5	PROSER1	NAA16	ELF1	SPG20	0.484958
Top genes:	WBP4:4	MRPS31:4	MTRF1:4	NAA16:4	KIAA1704:3	AKAP11:3	GTF2F2:3	COG6:3	NUFIP1:3	SLC25A15:3
86	chr7p13	4	0.478405
brca.gse2034	null
brca.tcga	chr7p14.1-p13	DDX56	DBNL	NUDCD3	POLD2	OGDH	URGCP	YKT6	TMED4	PSMA2	C7orf44	GCK	UBE2D4	C7orf25	STARD3NL	0.502895
coad.gse14333	null
coad.tcga	chr7p14.1-p13	NUDCD3	CCM2	URGCP	POLD2	DDX56	PPIA	YKT6	MRPS24	DBNL	TBRG4	H2AFV	ZMIZ2	C7orf25	PURB	0.484815
ov.gse9891	chr7p13-p12.1	YKT6	DDX56	CCM2	TBRG4	HUS1	H2AFV	PURB	OGDH	ZMIZ2	NUDCD3	FIGNL1	SNHG15	TMED4	GRB10	0.478405
ov.tcga	chr7p13-p12.3	DDX56	POLD2	TBRG4	YKT6	NUDCD3	URGCP	H2AFV	PPIA	OGDH	ZMIZ2	HUS1	C7orf44	POLM	UBE2D4	0.486724
Top genes:	DDX56:4	NUDCD3:4	YKT6:4	POLD2:3	OGDH:3	URGCP:3	TBRG4:3	H2AFV:3	ZMIZ2:3	DBNL:2
87	chr17q11.2	4	0.472232
brca.gse2034	null
brca.tcga	chr17q11.2-q12	C17orf75	C17orf79	SUZ12	UTP6	RHOT1	PSMD11	TEFM	ZNF207	ZNF830	LIG3	LRRC37B	RFFL	RAD51D	NF1	0.481781
coad.gse14333	chr17q11.2	UTP6	SUZ12	GOSR1	PSMD11	C17orf75	NSRP1	TEFM	ATAD5	RHOT1	ZNF207	NF1	RAB11FIP4	BLMH	C17orf79	0.549687
coad.tcga	null
ov.gse9891	chr17q11.2-q12	SUZ12	RHOT1	TEFM	C17orf75	UTP6	PSMD11	C17orf79	ZNF830	NF1	ZNF207	CRLF3	ATAD5	RAB11FIP4	RNF135	0.472232
ov.tcga	chr17q11.2-q12	PSMD11	RHOT1	C17orf75	UTP6	SUZ12	AP2B1	ZNF207	PEX12	LIG3	MYO1D	CCT6B	SLFN12	RAD51D	NLE1	0.546445
Top genes:	C17orf75:4	SUZ12:4	UTP6:4	RHOT1:4	PSMD11:4	ZNF207:4	C17orf79:3	TEFM:3	NF1:3	ZNF830:2
88	chr12q15	4	0.466167
brca.gse2034	chr12q15-q21.2	MDM1	CNOT2	RAB21	TBC1D15	YEATS4	RAP1B	NUP107	KRR1	SLC35E3	BBS10	NAP1L1	OSBPL8	ZDHHC17	ZFC3H1	0.466167
brca.tcga	chr12q14.3-q21.1	YEATS4	CCT2	MDM1	FRS2	CNOT2	CAND1	SLC35E3	RAB21	NUP107	TMEM19	RAB3IP	MDM2	TBC1D15	RAP1B	0.495778
coad.gse14333	null
coad.tcga	null
ov.gse9891	chr12q14.3-q15	YEATS4	MDM1	CCT2	NUP107	CAND1	CPSF6	LLPH	SLC35E3	LEMD3	RAP1B	FRS2	DYRK2	TMBIM4	MDM2	0.567113
ov.tcga	chr12q15-q21.2	CCT2	CNOT2	NUP107	YEATS4	TBC1D15	RAB21	SLC35E3	CPSF6	KRR1	ZFC3H1	PPP1R12A	BBS10	FRS2	OSBPL8	0.591807
Top genes:	YEATS4:4	NUP107:4	SLC35E3:4	MDM1:3	CNOT2:3	RAB21:3	TBC1D15:3	RAP1B:3	CCT2:3	FRS2:3
89	chr5q31.3	4	0.463274
brca.gse2034	chr5q31.3	PCDHGA1	PCDHGA10	PCDHGA9	PCDHGC3	PCDHGA3	PCDHGB5	PCDHGA11	PCDHGB6	PCDH1	PCDHB13	HMHB1	PCDHB12	PCDH12	DIAPH1	0.463274
brca.tcga	chr5q31.3	PCDHB11	PCDHB10	PCDHB15	PCDHB9	PCDHB7	PCDHB8	PCDHB12	PCDHB14	PCDHB16	PCDHB13	PCDHB6	PCDHGA3	PCDHGB2	PCDHB17	0.581556
coad.gse14333	null
coad.tcga	chr5q31.3	PCDHB11	PCDHB15	PCDHB14	PCDHB10	PCDHB9	PCDHB12	PCDHB13	PCDHB16	PCDHB8	PCDHB18	TAF7	SPRY4	FGF1	RNF14	0.494666
ov.gse9891	chr5q31.3	PCDHB11	PCDHB10	PCDHB6	PCDHB18	PCDHB14	PCDHB13	PCDHB12	PCDHB16	PCDHB7	PCDHB4	PCDHB2	PCDHB8	TAF7	PCDHGA3	0.571302
ov.tcga	null
Top genes:	PCDHB13:4	PCDHB12:4	PCDHGA3:3	PCDHB11:3	PCDHB10:3	PCDHB8:3	PCDHB14:3	PCDHB16:3	PCDHB15:2	PCDHB9:2
90	chr2q14.3	4	0.463143
brca.gse2034	null
brca.tcga	chr2q14.1-q14.3	IWS1	POLR2D	ERCC3	TSN	AMMECR1L	SFT2D3	MKI67IP	SAP130	DDX18	TMEM185B	CCDC93	UGGT1	MAP3K2	TMEM177	0.482605
coad.gse14333	chr2q14.1-q14.3	POLR2D	AMMECR1L	IWS1	ERCC3	TSN	UGGT1	SAP130	WDR33	CCDC93	PTPN4	CLASP1	MAP3K2	TMEM177	TMEM185B	0.489323
coad.tcga	null
ov.gse9891	chr2q14.3-q21.1	IWS1	SAP130	TSN	FAM168B	POLR2D	WDR33	ERCC3	AMMECR1L	CLASP1	UGGT1	MKI67IP	LOC254128	IMP4	MAP3K2	0.543034
ov.tcga	chr2q14.1-q14.3	TSN	DDX18	TMEM185B	ERCC3	POLR2D	PTPN4	RALB	SAP130	INSIG2	CLASP1	CCDC93	TMEM177	UGGT1	MAP3K2	0.463143
Top genes:	POLR2D:4	ERCC3:4	TSN:4	SAP130:4	UGGT1:4	MAP3K2:4	IWS1:3	AMMECR1L:3	TMEM185B:3	CCDC93:3
91	chr19q13.43	4	0.462359
brca.gse2034	null
brca.tcga	chr19q13.43	ZNF530	ZNF134	ZNF17	ZNF154	ZNF211	ZNF304	ZNF548	ZNF416	ZNF419	ZNF551	TRAPPC2P1	ZNF543	ZNF776	ZNF264	0.67438
coad.gse14333	null
coad.tcga	chr19q13.43	ZNF773	ZNF606	ZNF530	ZNF419	C19orf18	ZNF256	ZNF549	ZNF134	ZNF154	ZSCAN18	ZNF417	ZNF551	ZNF550	ZNF211	0.462359
ov.gse9891	chr19q13.43	ZNF419	ZNF134	ZNF304	ZNF416	ZNF548	ZNF542	ZIK1	ZNF551	ZNF776	ZNF211	ZFP28	ZNF667	LOC100128252	ZNF805	0.57019
ov.tcga	chr19q13.43	ZNF304	ZNF551	ZNF419	ZNF211	ZNF134	ZNF587	ZNF606	ZSCAN18	ZNF135	ZNF264	ZNF552	VN1R1	ZNF586	ZNF749	0.589637
Top genes:	ZNF134:4	ZNF211:4	ZNF419:4	ZNF551:4	ZNF304:3	ZNF530:2	ZNF154:2	ZNF548:2	ZNF416:2	ZNF776:2
92	chr19p13.11	4	0.441759
brca.gse2034	chr19p13.12-p13.11	RPL18A	TPM4	GLT25D1	DDA1	SLC35E1	PLVAP	MYO9B	PGLS	MRPL34	MAP1S	ABHD8	BST2	RAB8A	USE1	0.441759
brca.tcga	null
coad.gse14333	null
coad.tcga	chr19p13.11	DDA1	MRPL34	CCDC124	BABAM1	RPL18A	UBA52	PGLS	C19orf60	KXD1	FAM125A	LSM4	MPV17L2	FKBP8	GTPBP3	0.465328
ov.gse9891	chr19p13.12-p13.11	SIN3B	FAM32A	BABAM1	CHERP	AP1M1	MED26	SLC35E1	BRD4	WIZ	EPS15L1	MYO9B	AKAP8	USE1	NR2F6	0.589748
ov.tcga	chr19p13.11	BABAM1	DDA1	USE1	MRPL34	PGLS	OCEL1	GTPBP3	LSM4	MAP1S	RPL18A	GLT25D1	NR2F6	ABHD8	MAST3	0.58423
Top genes:	RPL18A:3	DDA1:3	PGLS:3	MRPL34:3	USE1:3	BABAM1:3	GLT25D1:2	SLC35E1:2	MYO9B:2	MAP1S:2
93	chr7q22.1	4	0.435927
brca.gse2034	null
brca.tcga	null
coad.gse14333	chr7q22.1-q22.1	MCM7	TRRAP	ARPC1A	COPS6	BUD31	CPSF4	ZNF498	AP4M1	ZNF394	ZSCAN21	FAM200A	PDAP1	ZKSCAN1	BAIAP2L1	0.541069
coad.tcga	chr7q22.1	PTCD1	TRRAP	ZNF498	CPSF4	ZKSCAN5	ZNF394	SMURF1	ZNF3	ZKSCAN1	TRIM4	ZNF789	COPS6	ARPC1B	AP4M1	0.435927
ov.gse9891	chr7q22.1	TAF6	AP4M1	BUD31	COPS6	MCM7	CPSF4	ZKSCAN5	PPP1R35	ATP5J2	ZSCAN21	MEPCE	ZNF394	C7orf59	ZNF498	0.505446
ov.tcga	chr7q22.1	CPSF4	ZNF3	COPS6	MEPCE	TAF6	ZNF394	AP4M1	ZKSCAN5	MCM7	BUD31	ZKSCAN1	PDAP1	C7orf43	PTCD1	0.521071
Top genes:	COPS6:4	CPSF4:4	AP4M1:4	ZNF394:4	MCM7:3	BUD31:3	ZNF498:3	ZKSCAN1:3	ZKSCAN5:3	TRRAP:2
94	chr11q13.1	4	0.435083
brca.gse2034	null
brca.tcga	chr11q13.1	MAP3K11	RELA	ZFPL1	FAM89B	SCYL1	ZNHIT2	KAT5	SIPA1	LTBP3	CAPN1	CCDC85B	C11orf68	EHBP1L1	SAC3D1	0.493723
coad.gse14333	null
coad.tcga	chr11q13.1	SSSCA1	FIBP	RNASEH2C	ZNHIT2	BANF1	FAU	C11orf68	CCDC85B	DRAP1	MRPL49	KAT5	FAM89B	RELA	SIPA1	0.435083
ov.gse9891	chr11q13.1	MAP3K11	DRAP1	SCYL1	SSSCA1	RELA	MRPL49	PCNXL3	SIPA1	FIBP	SART1	MUS81	FAM89B	SYVN1	CAPN1	0.50705
ov.tcga	chr11q13.1-q13.2	SSSCA1	FAM89B	RELA	RAB1B	FIBP	DRAP1	CFL1	BANF1	C11orf68	MUS81	YIF1A	MRPL11	BRMS1	MAP3K11	0.501991
Top genes:	RELA:4	FAM89B:4	MAP3K11:3	SIPA1:3	C11orf68:3	SSSCA1:3	FIBP:3	DRAP1:3	SCYL1:2	ZNHIT2:2
95	chr16q22.1	4	0.434914
brca.gse2034	null
brca.tcga	chr16q22.1	DUS2L	VPS4A	NFATC3	EDC4	CIRH1A	NUTF2	EXOSC6	NOB1	DDX19B	NIP7	AARS	WWP2	PSKH1	DDX28	0.581169
coad.gse14333	chr16q22.1	NIP7	CIRH1A	DDX19A	SF3B3	DDX28	NOB1	COG4	NFATC3	PRMT7	ESRP2	SNTB2	TMCO7	SLC7A6	VPS4A	0.514548
coad.tcga	chr16q22.1	EDC4	RANBP10	NFAT5	SLC7A6	CDH1	ESRP2	NFATC3	VPS4A	SNTB2	SMPD3	TERF2	HSD11B2	CTCF	CYB5B	0.434914
ov.gse9891	null
ov.tcga	chr16q22.1	VPS4A	AARS	CYB5B	TERF2	DDX19A	NIP7	WWP2	EDC4	DDX28	NFATC3	PSKH1	DUS2L	CDH1	ESRP2	0.515182
Top genes:	VPS4A:4	NFATC3:4	EDC4:3	NIP7:3	DDX28:3	ESRP2:3	DUS2L:2	CIRH1A:2	NOB1:2	AARS:2
96	chr3p21.31	4	0.4301
brca.gse2034	chr3p21.31-p21.2	NPRL2	SEMA3B	HEMK1	ZMYND10	TUSC2	TEX264	ABHD14A	CYB561D2	CISH	TMEM115	CACNA2D2	C3orf18	PARP3	MAPKAPK3	0.4301
brca.tcga	chr3p21.31-p21.1	NPRL2	TMEM115	TEX264	HEMK1	CYB561D2	ABHD14B	PHF7	NISCH	CISH	ABHD14A	C3orf18	ACY1	PARP3	MAPKAPK3	0.497235
coad.gse14333	null
coad.tcga	chr3p21.31-p21.2	NPRL2	CYB561D2	TUSC2	TEX264	HYAL2	IFRD2	RRP9	RPL29	HYAL3	ABHD14A	ACY1	ABHD14B	MON1A	RASSF1	0.445099
ov.gse9891	null
ov.tcga	chr3p21.31-p21.2	IFRD2	NPRL2	TUSC2	HEMK1	TMEM115	TEX264	MAPKAPK3	RRP9	HYAL2	CYB561D2	ABHD14A	RASSF1	PARP3	GNAI2	0.522528
Top genes:	NPRL2:4	TEX264:4	ABHD14A:4	CYB561D2:4	HEMK1:3	TUSC2:3	TMEM115:3	PARP3:3	MAPKAPK3:3	CISH:2
97	chr15q21.1	4	0.414106
brca.gse2034	chr15q15.2-q21.1	SPG11	LCMT2	TMEM62	MFAP1	EIF3J	SORD	TP53BP1	SPATA5L1	PPIP5K1	ELL3	GATM	SERF2	TUBGCP4	SLC30A4	0.414106
brca.tcga	null
coad.gse14333	chr15q15.3-q21.2	EIF3J	MFAP1	COPS2	SPATA5L1	DUT	WDR76	CTDSPL2	PLDN	GALK2	CASC4	SQRDL	SORD	B2M	CEP152	0.591623
coad.tcga	null
ov.gse9891	chr15q15.3-q21.2	COPS2	PLDN	CASC4	EID1	EIF3J	MFAP1	SPATA5L1	DTWD1	DUT	SECISBP2L	GALK2	SPG11	LOC645212	CTDSPL2	0.530217
ov.tcga	chr15q15.1-q21.1	EIF3J	MFAP1	SPG11	TMEM87A	ZFP106	TUBGCP4	LCMT2	C15orf63	VPS39	TP53BP1	SNAP23	PDIA3	SERF2	PPIP5K1	0.515782
Top genes:	MFAP1:4	EIF3J:4	SPG11:3	SPATA5L1:3	LCMT2:2	SORD:2	TP53BP1:2	PPIP5K1:2	SERF2:2	TUBGCP4:2
98	chr4p14	4	0.413399
brca.gse2034	chr4p14-p12	UBE2K	SLC30A9	TMEM33	PDS5A	RFC1	APBB2	RBM47	GUF1	WDR19	UGDH	RPL9	FAM114A1	LIAS	LIMCH1	0.43943
brca.tcga	chr4p15.2-p14	TLR6	TLR1	TMEM156	TLR10	SEL1L3	ARAP2	TBC1D1	KLHL5	PI4K2B	PGM2	KLF3	RBPJ	SLC34A2	ANAPC4	0.460593
coad.gse14333	chr4p15.2-p14	UBE2K	RFC1	DHX15	PGM2	PDS5A	SEPSECS	LIAS	ANAPC4	C4orf52	RPL9	ZCCHC4	RBPJ	PI4K2B	STIM2	0.573896
coad.tcga	chr4p14-p11	UBE2K	UGDH	GUF1	APBB2	SLC30A9	OCIAD1	TMEM33	PDS5A	N4BP2	NFXL1	SLAIN2	C4orf34	RBM47	LIMCH1	0.413399
ov.gse9891	null
ov.tcga	null
Top genes:	UBE2K:3	PDS5A:3	SLC30A9:2	TMEM33:2	RFC1:2	APBB2:2	RBM47:2	GUF1:2	UGDH:2	RPL9:2
99	chr1q24.2	4	0.407971
brca.gse2034	chr1q24.2-q25.1	SCYL3	C1orf9	VAMP4	METTL13	METTL18	C1orf112	KLHL20	PRDX6	PIGC	KIFAP3	PRRC2C	DARS2	DNM3	C1orf105	0.491685
brca.tcga	null
coad.gse14333	chr1q24.2-q25.1	C1orf112	CENPL	C1orf9	GORAB	METTL13	SCYL3	DARS2	SLC19A2	PRRC2C	METTL18	KLHL20	KIFAP3	PIGC	PRDX6	0.472653
coad.tcga	chr1q24.1-q24.2	METTL18	SCYL3	TADA1	TIPRL	GORAB	NME7	BLZF1	CREG1	DCAF6	KIFAP3	SLC19A2	MPZL1	C1orf112	BRP44	0.429058
ov.gse9891	chr1q24.2-q25.1	C1orf112	GORAB	CENPL	KLHL20	C1orf9	METTL13	PIGC	KIFAP3	DARS2	PRDX6	SCYL3	SNORD81	METTL18	PRRC2C	0.407971
ov.tcga	null
Top genes:	SCYL3:4	METTL18:4	C1orf112:4	KIFAP3:4	C1orf9:3	METTL13:3	KLHL20:3	PRDX6:3	PIGC:3	PRRC2C:3
100	chr1p22.1	4	0.407663
brca.gse2034	chr1p22.2-p21.3	MTF2	DNTTIP2	PTBP2	RWDD3	FNBP1L	LRRC8B	GLMN	DR1	LRRC8D	GCLM	TMED5	CDC7	ARHGAP29	EVI5	0.4889
brca.tcga	chr1p22.2-p21.3	DNTTIP2	RPAP2	CCDC18	GLMN	RWDD3	MTF2	LRRC8D	RPL5	FNBP1L	DR1	PTBP2	ZNF326	CDC7	ZNF644	0.423979
coad.gse14333	null
coad.tcga	chr1p22.2-p21.3	TMED5	RPAP2	GLMN	ABCD3	DR1	RPL5	ALG14	EPHX4	CNN3	GCLM	RWDD3	DNTTIP2	CDC7	TMEM56	0.407663
ov.gse9891	chr1p22.1-p21.2	MTF2	AGL	HIAT1	DNTTIP2	FNBP1L	SASS6	DBT	DR1	CCDC76	RWDD3	RTCA	SLC35A3	CCDC18	PTBP2	0.494466
ov.tcga	null
Top genes:	DNTTIP2:4	RWDD3:4	DR1:4	MTF2:3	PTBP2:3	FNBP1L:3	GLMN:3	CDC7:3	LRRC8D:2	GCLM:2
101	chr6q27	4	0.405041
brca.gse2034	null
brca.tcga	chr6q27	PDCD2	TBP	C6orf70	PSMB1	FGFR1OP	C6orf120	PHF10	FAM120B	RNASET2	WDR27	TCTE3	MLLT4	CCR6	RPS6KA2	0.405041
coad.gse14333	null
coad.tcga	chr6q27	PSMB1	TBP	SFT2D1	BRP44L	FGFR1OP	PDCD2	C6orf70	C6orf120	RNASET2	MLLT4	GPR31	PHF10	TCTE3	CCR6	0.484884
ov.gse9891	chr6q27	PSMB1	TBP	PHF10	FAM120B	C6orf70	PDCD2	C6orf120	FGFR1OP	WDR27	RNASET2	MLLT4	RPS6KA2	BRP44L	MLLT4-AS1	0.52993
ov.tcga	chr6q27-p22.3	TBP	PDCD2	PSMB1	C6orf120	PHF10	MLLT4-AS1	INTS1	HEATR2	MLLT4	SUN1	PDGFA	C6orf123	UNC93A	PRKAR1B	0.53277
Top genes:	PDCD2:4	TBP:4	PSMB1:4	C6orf120:4	PHF10:4	MLLT4:4	C6orf70:3	FGFR1OP:3	RNASET2:3	FAM120B:2
102	chr5p15.33	4	0.404896
brca.gse2034	chr5p15.33-p15.31	TRIP13	KIAA0947	PAPD7	NDUFS6	SRD5A1	EXOC3	LPCAT1	SDHA	BRD9	PDCD6	CEP72	SLC12A7	IRX4	ADCY2	0.404896
brca.tcga	chr5p15.33-p15.31	CLPTM1L	NDUFS6	MRPL36	CEP72	BRD9	NSUN2	PDCD6	EXOC3	SLC12A7	SDHA	TRIP13	KIAA0947	MED10	LPCAT1	0.444133
coad.gse14333	chr5p15.33-p15.31	CLPTM1L	NSUN2	FASTKD3	KIAA0947	NDUFS6	PDCD6	TRIP13	PAPD7	MRPL36	MED10	SRD5A1	EXOC3	MTRR	BRD9	0.598455
coad.tcga	null
ov.gse9891	chr5p15.33	PDCD6	NDUFS6	EXOC3	SDHA	MRPL36	CLPTM1L	SLC12A7	TRIP13	BRD9	CCDC127	PP7080	CEP72	LOC728613	LPCAT1	0.567925
ov.tcga	null
Top genes:	TRIP13:4	NDUFS6:4	EXOC3:4	BRD9:4	PDCD6:4	KIAA0947:3	LPCAT1:3	SDHA:3	CEP72:3	SLC12A7:3
103	chr21q21.3	4	0.397018
brca.gse2034	chr21q21.3	ATP5J	MRPL39	CCT8	USP16	LTN1	APP	RWDD2B	BACH1	N6AMT1	ADAMTS1	GABPA	ADAMTS5	JAM2	C21orf7	0.436887
brca.tcga	chr21q21.1-q21.3	USP16	GABPA	MRPL39	LTN1	CCT8	ATP5J	N6AMT1	RWDD2B	BACH1	MIR155HG	CHODL	TMPRSS15	APP	LINC00161	0.420452
coad.gse14333	null
coad.tcga	chr21q21.1-q21.3	MRPL39	C21orf91	ATP5J	N6AMT1	CCT8	RWDD2B	GABPA	BTG3	USP16	MIR155HG	C21orf7	USP25	BACH1	LTN1	0.397018
ov.gse9891	null
ov.tcga	chr21q21.3	MRPL39	CCT8	USP16	ATP5J	RWDD2B	LTN1	N6AMT1	GABPA	BACH1	APP	ADAMTS1	C21orf7	JAM2	ADAMTS5	0.541907
Top genes:	ATP5J:4	MRPL39:4	CCT8:4	USP16:4	LTN1:4	RWDD2B:4	BACH1:4	N6AMT1:4	GABPA:4	APP:3
104	chr12q24.11	4	0.388012
brca.gse2034	chr12q23.3-q24.11	GPN3	PWP1	PPP1CC	SART3	CRY1	UNG	IFT81	ISCU	PRDM4	ARPC3	CORO1C	UBE3B	ATP2A2	SSH1	0.414939
brca.tcga	chr12q24.11-q24.12	ANAPC7	GPN3	MAPKAPK5	TCHP	PPP1CC	UNG	VPS29	USP30	MVK	ARPC3	ATP2A2	ACAD10	IFT81	MMAB	0.452037
coad.gse14333	null
coad.tcga	chr12q24.11-q24.13	PPP1CC	CORO1C	BRAP	GIT2	UNG	TCHP	PPTC7	SSH1	ERP29	GPN3	ATP2A2	GLTP	VPS29	MAPKAPK5	0.388012
ov.gse9891	chr12q23.3-q24.11	USP30	SART3	PWP1	POLR3B	GPN3	ANAPC7	PRDM4	IFT81	UNG	MTERFD3	C12orf76	ALKBH2	C12orf23	RIC8B	0.559678
ov.tcga	null
Top genes:	GPN3:4	UNG:4	PPP1CC:3	IFT81:3	ATP2A2:3	PWP1:2	SART3:2	PRDM4:2	ARPC3:2	CORO1C:2
105	chr19q13.32	4	0.383298
brca.gse2034	chr19q13.32	BBC3	NPAS1	GIPR	DMWD	PPP5C	SIX5	SLC1A5	RSPH6A	NOVA2	ARHGAP35	PGLYRP1	PTGIR	QPCTL	STRN4	0.481633
brca.tcga	null
coad.gse14333	chr19q13.32-q13.33	ZC3H4	STRN4	ARHGAP35	NAPA	SLC1A5	BBC3	DHX34	PRKD2	TMEM160	GLTSCR2	AP2S1	SAE1	LOC100505681	CALM3	0.399788
coad.tcga	chr19q13.32-q13.33	ARHGAP35	PRKD2	SLC1A5	FKRP	GLTSCR2	STRN4	GLTSCR1	CCDC9	BBC3	NAPA	PPP5C	SAE1	KPTN	SEPW1	0.383298
ov.gse9891	null
ov.tcga	chr19q13.32-q13.33	SAE1	NAPA	CALM3	STRN4	PRKD2	AP2S1	PPP5C	GLTSCR1	ARHGAP35	KPTN	SLC1A5	PNMAL1	ZC3H4	DHX34	0.477507
Top genes:	SLC1A5:4	ARHGAP35:4	STRN4:4	BBC3:3	PPP5C:3	NAPA:3	PRKD2:3	SAE1:3	ZC3H4:2	DHX34:2
106	chr1p34.1	4	0.381435
brca.gse2034	chr1p34.2-p34.1	ERI3	ELOVL1	YBX1	ATP6V0B	PTPRF	MED8	DPH2	PPIH	RNF220	SCMH1	CDC20	IPO13	B4GALT2	SZT2	0.448617
brca.tcga	chr1p34.1-p33	RAD54L	KIF2C	NASP	UQCRH	MUTYH	HPDL	NSUN4	TOE1	EIF2B3	MMACHC	RNF220	ERI3	TMEM69	PRDX1	0.510177
coad.gse14333	chr1p34.2-p34.1	KIF2C	CDC20	PPIH	EBNA1BP2	ELOVL1	ERI3	DPH2	YBX1	C1orf50	MED8	ATP6V0B	B4GALT2	RPS8	CCDC23	0.541674
coad.tcga	chr1p34.1-p33	TMEM69	MMACHC	RPS8	ATPAF1	NSUN4	TOE1	EIF2B3	AKR1A1	POMGNT1	TESK2	PRDX1	UQCRH	LRRC41	FAAH	0.381435
ov.gse9891	null
ov.tcga	null
Top genes:	ERI3:3	ELOVL1:2	YBX1:2	ATP6V0B:2	MED8:2	DPH2:2	PPIH:2	RNF220:2	CDC20:2	B4GALT2:2
107	chr7q11.23	4	0.379657
brca.gse2034	null
brca.tcga	chr7q11.23	NSUN5P2	CLDN4	WBSCR22	ABHD11	NSUN5	TBL2	WBSCR16	EIF4H	CLDN3	BCL7B	GTF2IRD1	BAZ1B	DNAJC30	RFC2	0.386087
coad.gse14333	chr7q11.23	MDH2	WBSCR22	WBSCR16	EIF4H	ABHD11	YWHAG	RFC2	POR	STYXL1	CLDN3	CLDN4	GTF2IRD1	RHBDD2	DNAJC30	0.525149
coad.tcga	null
ov.gse9891	chr7q11.23	WBSCR22	BAZ1B	EIF4H	NSUN5	TBL2	BCL7B	DNAJC30	WBSCR16	RFC2	ABHD11	CLDN4	CLDN3	PMS2P5	STX1A	0.444416
ov.tcga	chr7q11.23	WBSCR22	POR	WBSCR16	STYXL1	TBL2	MDH2	EIF4H	ABHD11	CLDN3	RFC2	CLDN4	HSPB1	GTF2I	PMS2P5	0.379657
Top genes:	CLDN4:4	WBSCR22:4	ABHD11:4	WBSCR16:4	EIF4H:4	CLDN3:4	RFC2:4	TBL2:3	DNAJC30:3	NSUN5:2
108	chr7q21.2	4	0.378616
brca.gse2034	null
brca.tcga	chr7q21.12-q21.3	PEX1	KRIT1	GTPBP10	BET1	CCDC132	RBM48	GATAD1	SLC25A40	AKAP9	CLDN12	MTERF	PON2	CASD1	ANKIB1	0.378616
coad.gse14333	null
coad.tcga	chr7q21.12-q21.3	GATAD1	KRIT1	ANKIB1	AKAP9	PEX1	PON2	PDK4	CDK6	CCDC132	GTPBP10	FAM133B	BET1	C7orf63	SRI	0.455494
ov.gse9891	chr7q21.2-q21.3	RBM48	PEX1	SLC25A13	CCDC132	BET1	KRIT1	SHFM1	GATAD1	MTERF	ANKIB1	PPP1R9A	ACN9	AKAP9	CASD1	0.513952
ov.tcga	chr7q21.12-q21.3	RBM48	KRIT1	GATAD1	BET1	PEX1	MTERF	AKAP9	CYP51A1	CASD1	DBF4	PON2	SRI	SGCE	PPP1R9A	0.496333
Top genes:	PEX1:4	KRIT1:4	BET1:4	GATAD1:4	AKAP9:4	CCDC132:3	RBM48:3	MTERF:3	PON2:3	CASD1:3
109	chr9q22.33	4	0.377977
brca.gse2034	chr9q22.33-q31.1	XPA	NANS	C9orf156	TSTD2	ZNF189	SEC61B	TDRD7	ANP32B	CORO2A	TEX10	ERP44	TBC1D2	TRIM14	STX17	0.377977
brca.tcga	null
coad.gse14333	chr9q22.32-q31.1	ALG2	NCBP1	TEX10	ANP32B	MRPL50	ZNF367	SEC61B	NANS	ERP44	TSTD2	TRIM14	STX17	INVS	TDRD7	0.514976
coad.tcga	chr9q22.31-q22.33	ZNF782	PHF2	HIATL1	FANCC	ERCC6L2	CDC14B	PTCH1	WNK2	PTPDC1	FAM120A	FAM120AOS	ZNF367	ANKRD19P	ZNF510	0.391901
ov.gse9891	chr9q22.33-q31.2	ALG2	MRPL50	SEC61B	STX17	NANS	MSANTD3	INVS	RNF20	ZNF189	ERP44	ANP32B	FKTN	TMEM38B	SLC44A1	0.510548
ov.tcga	null
Top genes:	NANS:3	SEC61B:3	ANP32B:3	ERP44:3	STX17:3	TSTD2:2	ZNF189:2	TDRD7:2	TEX10:2	TRIM14:2
110	chr11q21	4	0.377684
brca.gse2034	chr11q14.3-q21	MTMR2	PANX1	MED17	CEP57	C11orf75	MRE11A	SNORA25	JRKL	ANKRD49	FUT4	SRSF8	ENDOD1	NAALAD2	KDM4D	0.449026
brca.tcga	null
coad.gse14333	null
coad.tcga	chr11q21-q22.1	MTMR2	JRKL	FAM76B	MED17	CCDC82	SRSF8	TAF1D	CEP57	CWC15	ENDOD1	PANX1	MRE11A	YAP1	FUT4	0.377684
ov.gse9891	chr11q21-q22.1	MED17	CWC15	FAM76B	ANKRD49	CEP57	MRE11A	SRSF8	JRKL	C11orf54	CCDC82	MTMR2	SNORA25	YAP1	TAF1D	0.529565
ov.tcga	chr11q21-q22.2	CEP57	MED17	MTMR2	ANKRD49	MRE11A	SRSF8	TAF1D	YAP1	JRKL	TMEM123	BIRC2	PANX1	FUT4	ENDOD1	0.506915
Top genes:	MTMR2:4	MED17:4	CEP57:4	MRE11A:4	JRKL:4	SRSF8:4	PANX1:3	ANKRD49:3	FUT4:3	ENDOD1:3
111	chr11q12.3	4	0.374156
brca.gse2034	chr11q12.2-q12.3	HNRNPUL2	BEST1	DAGLA	RAB3IL1	TAF6L	TUT1	C11orf9	GNG3	ROM1	MTA2	B3GAT3	INCENP	SCGB1D1	EML3	0.374156
brca.tcga	chr11q12.3	C11orf48	TMEM223	WDR74	TUT1	TTC9C	TAF6L	STX5	POLR2G	B3GAT3	ZBTB3	GANAB	MTA2	EEF1G	INCENP	0.466239
coad.gse14333	null
coad.tcga	chr11q12.3-q13.1	TTC9C	TMEM223	OTUB1	POLR2G	STX5	NUDT22	COX8A	TAF6L	TRPT1	CHRM1	WDR74	RARRES3	BSCL2	SLC22A8	0.474541
ov.gse9891	null
ov.tcga	chr11q12.3	INTS5	WDR74	C11orf48	TMEM223	BSCL2	B3GAT3	STX5	POLR2G	GANAB	SLC3A2	EEF1G	EML3	TAF6L	HNRNPUL2	0.452882
Top genes:	TAF6L:4	B3GAT3:3	TMEM223:3	WDR74:3	STX5:3	POLR2G:3	HNRNPUL2:2	TUT1:2	MTA2:2	INCENP:2
112	chr3p22.3	4	0.372667
brca.gse2034	null
brca.tcga	chr3p22.3-p22.1	PDCD6IP	GORASP1	CTDSPL	SLC25A38	CLASP2	ACAA1	GOLGA4	MLH1	RPL14	EIF1B	UBP1	CSRNP1	EPM2AIP1	TTC21A	0.372667
coad.gse14333	null
coad.tcga	chr3p24.2-p22.2	UBP1	TOP2B	CNOT10	CLASP2	NGLY1	STT3B	CMTM8	GLB1	PDCD6IP	GOLGA4	OXSM	GPD1L	LRRFIP2	SLC4A7	0.420328
ov.gse9891	chr3p24.2-p22.2	CNOT10	CMC1	DYNC1LI1	UBP1	OXSM	NGLY1	PDCD6IP	LRRFIP2	MLH1	GLB1	AZI2	CLASP2	GOLGA4	GPD1L	0.530169
ov.tcga	chr3p22.3-p22.2	UBP1	OXSR1	WDR48	CLASP2	PDCD6IP	GOLGA4	GORASP1	GLB1	MLH1	GPD1L	MYD88	LRRFIP2	DYNC1LI1	CRTAP	0.515958
Top genes:	PDCD6IP:4	CLASP2:4	GOLGA4:4	UBP1:4	MLH1:3	GLB1:3	GPD1L:3	LRRFIP2:3	GORASP1:2	CNOT10:2
113	chr22q11.21	4	0.372376
brca.gse2034	chr22q11.21-q11.23	SLC7A4	P2RX6	PPIL2	TOP3B	ZDHHC8P1	HIC2	ZNF280B	RTDR1	FBXW4P1	GNAZ	ZNF280A	IGLL1	C22orf43	LZTR1	0.372376
brca.tcga	chr22q11.21	KLHL22	PI4KA	C22orf25	DGCR6L	PI4KAP2	PPIL2	THAP7	BCRP2	ZNF74	MED15	LZTR1	SNAP29	TRMT2A	CRKL	0.542526
coad.gse14333	chr22q11.21	CDC45	UFD1L	RANBP1	MRPL40	BID	DGCR14	HIRA	DGCR2	C22orf25	SLC25A1	GNB1L	COMT	ATP6V1E1	PEX26	0.485217
coad.tcga	null
ov.gse9891	null
ov.tcga	chr22q11.21	UBE2L3	PI4KA	THAP7	CRKL	SNAP29	LZTR1	KLHL22	MED15	SDF2L1	RANBP1	PPIL2	YPEL1	HIC2	TRMT2A	0.595163
Top genes:	PPIL2:3	LZTR1:3	HIC2:2	KLHL22:2	PI4KA:2	C22orf25:2	THAP7:2	MED15:2	SNAP29:2	TRMT2A:2
114	chr5q32	4	0.36636
brca.gse2034	chr5q32-q33.1	CAMK2A	HTR4	PDE6A	SLC6A7	JAKMIP2	CDX1	MYOZ3	HMGXB3	SPINK5	SH3TC2	ABLIM3	NDST1	SPINK1	TCOF1	0.3996
brca.tcga	chr5q32-q33.2	ABLIM3	DCTN4	FAM114A2	TIGD6	CSNK1A1	PCYOX1L	ADRB2	ATOX1	RPS14	ANXA6	C5orf62	SPARC	RBM22	PDGFRB	0.40614
coad.gse14333	chr5q32-q33.1	CSNK1A1	DCTN4	RBM22	GRPEL2	FBXO38	G3BP1	RPS14	C5orf62	GM2A	TNIP1	SLC6A7	CDX1	ATOX1	PPARGC1B	0.501415
coad.tcga	chr5q32	DPYSL3	PDGFRB	PPP2R2B	JAKMIP2	CD74	ADRB2	CSF1R	ABLIM3	AFAP1L1	SPINK6	SCGB3A2	SPINK13	IL17B	ARHGEF37	0.36636
ov.gse9891	null
ov.tcga	null
Top genes:	ABLIM3:3	SLC6A7:2	JAKMIP2:2	CDX1:2	DCTN4:2	CSNK1A1:2	ADRB2:2	ATOX1:2	RPS14:2	C5orf62:2
115	chr9q33.3	4	0.36478
brca.gse2034	null
brca.tcga	chr9q33.2-q33.3	ARPC5L	PSMB7	RPL35	RABEPK	RC3H2	GOLGA1	PPP6C	MRRF	DENND1A	PDCL	RBM18	GAPVD1	STRBP	ZBTB6	0.36478
coad.gse14333	null
coad.tcga	chr9q33.2-q33.3	STRBP	GOLGA1	RALGPS1	GARNL3	ARPC5L	DENND1A	GAPVD1	ZBTB26	MIR600HG	SLC2A8	LRSAM1	RC3H2	ZNF79	RABGAP1	0.387756
ov.gse9891	chr9q33.3-q34.11	PPP6C	PSMB7	GAPVD1	MAPKAP1	ARPC5L	GOLGA1	ZBTB34	RABEPK	ZBTB43	DPM2	TOR2A	RPL35	STXBP1	FPGS	0.551278
ov.tcga	chr9q33.2-q33.3	PSMB7	NDUFA8	PPP6C	ARPC5L	RABEPK	PDCL	RC3H2	GOLGA1	RPL35	RABGAP1	ZBTB6	DENND1A	PTGS1	LHX6	0.538226
Top genes:	ARPC5L:4	GOLGA1:4	PSMB7:3	RPL35:3	RABEPK:3	RC3H2:3	PPP6C:3	DENND1A:3	GAPVD1:3	PDCL:2
116	chr10p12.1	4	0.361689
brca.gse2034	chr10p12.1-p11.1	ABI1	MTPAP	YME1L1	PDSS1	CUL2	KIF5B	PARD3	WAC	SVIL	ARHGAP12	CREM	ZNF248	BAMBI	ANKRD26	0.361689
brca.tcga	chr10p12.1-p11.22	PDSS1	ABI1	MASTL	YME1L1	MTPAP	ARHGAP21	WAC	KIF5B	THNSL1	PRTFDC1	SVIL	ZNF438	ACBD5	RAB18	0.488976
coad.gse14333	null
coad.tcga	null
ov.gse9891	chr10p12.1-p11.21	YME1L1	WAC	RAB18	MASTL	MTPAP	PDSS1	ABI1	CUL2	ACBD5	KIF5B	ANKRD26	ARHGAP12	ITGB1	ZNF438	0.428218
ov.tcga	chr10p12.1-p11.1	WAC	ABI1	MTPAP	YME1L1	ARHGAP12	CUL2	KIF5B	PDSS1	CREM	PARD3	ZNF37A	ITGB1	ANKRD26	MAP3K8	0.415202
Top genes:	ABI1:4	MTPAP:4	YME1L1:4	PDSS1:4	KIF5B:4	WAC:4	CUL2:3	ARHGAP12:3	ANKRD26:3	PARD3:2
117	chr7q32.1	4	0.360368
brca.gse2034	chr7q31.31-q32.1	PAX4	FSCN3	SPAM1	TAS2R16	HYAL4	WNT16	GRM8	SLC13A1	C7orf58	OPN1SW	FLNC	WASL	AASS	SND1	0.427892
brca.tcga	chr7q32.1-q32.2	RBM28	ARF5	CALU	MGC27345	ZC3HC1	SMO	SND1	ATP6V1F	CPA4	IMPDH1	TSPAN33	HILPDA	KLHDC10	GCC1	0.362702
coad.gse14333	chr7q31.33-q32.2	TNPO3	MGC27345	KLHDC10	SND1	TMEM209	IMPDH1	RBM28	ARF5	POT1	ZC3HC1	ATP6V1F	NRF1	GCC1	HILPDA	0.542017
coad.tcga	null
ov.gse9891	chr7q31.32-q32.1	SND1	ARF5	GCC1	IMPDH1	MGC27345	SND1-IT1	RBM28	POT1	ATP6V1F	HILPDA	LOC100130705	CALU	WASL	ZNF800	0.360368
ov.tcga	null
Top genes:	SND1:4	RBM28:3	ARF5:3	MGC27345:3	ATP6V1F:3	IMPDH1:3	HILPDA:3	GCC1:3	WASL:2	CALU:2
118	chrXq26.3	4	0.318718
brca.gse2034	chrXq26.2-q26.3	FAM127B	HPRT1	MOSPD1	SLC9A6	FAM127A	HTATSF1	ZNF75D	SAGE1	TFDP3	CXorf48	PLAC1	GPC3	FHL1	MAP7D3	0.368018
brca.tcga	chrXq26.3-q27.1	DDX26B	VGLL1	SLC9A6	LINC00086	ATP11C	MAP7D3	MMGT1	FAM127B	CT45A6	HTATSF1	FHL1	LDOC1	CDR1	CD40LG	0.318718
coad.gse14333	null
coad.tcga	null
ov.gse9891	chrXq26.3-q27.1	FAM122B	MMGT1	HTATSF1	ZNF75D	FAM127B	SLC9A6	ATP11C	ZNF449	MOSPD1	FAM122C	MAP7D3	FAM127A	CXorf69	DDX26B	0.512131
ov.tcga	chrXq26.1-q26.3	FAM127B	RAP2C	RBMX2	HPRT1	MOSPD1	ZNF75D	ENOX2	FAM127A	GPC4	PLAC1	MBNL3	GPC3	IGSF1	CXorf48	0.48288
Top genes:	FAM127B:4	MOSPD1:3	SLC9A6:3	FAM127A:3	HTATSF1:3	ZNF75D:3	MAP7D3:3	HPRT1:2	CXorf48:2	PLAC1:2
119	chr11p15.4	4	0.303184
brca.gse2034	chr11p15.4	OR52A1	UBQLN3	HBE1	MMP26	HBBP1	HBD	HBB	TRIM5	0.467696
brca.tcga	chr11p15.4	NUP98	NAP1L4	PGAP2	CARS	RRM1	STIM1	CHRNA10	RHOG	ZNF195	TRIM21	OSBPL5	OR52J3	OR51A7	MMP26	0.303184
coad.gse14333	chr11p15.4	OR51B4	OR51B5	OR51B2	TRIM78P	UBQLN3	OR52A1	OR51B6	OR51I1	OR51M1	OR51I2	OR52D1	HBE1	MMP26	OR51E2	0.546634
coad.tcga	chr11p15.4	HBE1	HBG1	OR52M1	HBD	OR51I2	OR52D1	OR51G2	OR51L1	HBG2	OR51E2	HBB	OR51G1	OR52K2	OR51S1	0.362738
ov.gse9891	null
ov.tcga	null
Top genes:	HBE1:3	MMP26:3	OR52A1:2	UBQLN3:2	HBD:2	HBB:2	OR51I2:2	OR52D1:2	OR51E2:2	HBBP1:1
120	chr8p11.23	3	0.59954
brca.gse2034	chr8p12-p11.21	ASH2L	ERLIN2	PROSC	LSM1	DDHD2	BRF2	BAG4	RAB11FIP1	WHSC1L1	EIF4EBP1	FGFR1	GOLGA7	ADAM9	MAK16	0.59954
brca.tcga	chr8p11.23-p11.22	WHSC1L1	BAG4	ASH2L	LSM1	DDHD2	PPAPDC1B	BRF2	PROSC	TM2D2	ERLIN2	RAB11FIP1	FGFR1	LETM2	EIF4EBP1	0.734474
coad.gse14333	null
coad.tcga	null
ov.gse9891	chr8p12-p11.22	LSM1	WHSC1L1	ASH2L	ERLIN2	BAG4	TM2D2	DDHD2	BRF2	PROSC	PPAPDC1B	PLEKHA2	MAK16	FGFR1	GTF2E2	0.65565
ov.tcga	null
Top genes:	ASH2L:3	ERLIN2:3	PROSC:3	LSM1:3	DDHD2:3	BRF2:3	BAG4:3	WHSC1L1:3	FGFR1:3	RAB11FIP1:2
121	chr6q21	3	0.572716
brca.gse2034	chr6q21	ATG5	QRSL1	SNX3	PDSS2	CDC40	TRAF3IP2	SEC63	PREP	ZBTB24	OSTM1	SMPD2	AIM1	REV3L	FIG4	0.646629
brca.tcga	chr6q21	QRSL1	ATG5	RTN4IP1	C6orf203	PDSS2	CDC40	PREP	SNX3	SEC63	CEP57L1	AIM1	GTF3C6	LACE1	ZBTB24	0.6591
coad.gse14333	null
coad.tcga	null
ov.gse9891	chr6q21	PDSS2	SEC63	CDC40	FIG4	ATG5	CDK19	QRSL1	AMD1	RTN4IP1	TUBE1	C6orf203	GTF3C6	SNX3	REV3L	0.572716
ov.tcga	null
Top genes:	ATG5:3	QRSL1:3	SNX3:3	PDSS2:3	CDC40:3	SEC63:3	PREP:2	ZBTB24:2	AIM1:2	REV3L:2
122	chr15q15.1	3	0.565117
brca.gse2034	null
brca.tcga	chr15q15.1	NUSAP1	OIP5	RAD51	BUB1B	CASC5	TYRO3	CHAC1	RPAP1	GCHFR	C15orf52	ITPKA	EXD1	BAHD1	MGA	0.565117
coad.gse14333	chr15q14-q15.1	NUSAP1	BUB1B	OIP5	C15orf23	RAD51	CASC5	OIP5-AS1	RPUSD2	PAK6	INO80	IVD	FAM98B	DNAJC17	GCHFR	0.652082
coad.tcga	null
ov.gse9891	chr15q15.1	BUB1B	NUSAP1	OIP5	C15orf23	RAD51	CASC5	OIP5-AS1	RPUSD2	RTF1	PAK6	CHAC1	INO80	BAHD1	EHD4	0.690661
ov.tcga	null
Top genes:	NUSAP1:3	OIP5:3	RAD51:3	BUB1B:3	CASC5:3	CHAC1:2	GCHFR:2	BAHD1:2	C15orf23:2	OIP5-AS1:2
123	chr8q23.1	3	0.553582
brca.gse2034	null
brca.tcga	chr8q23.1-q24.13	NUDCD1	C8orf76	MRPL13	ENY2	MED30	EMC2	TAF2	MTBP	RAD21	DSCC1	WDR67	DERL1	EBAG9	UTP23	0.642172
coad.gse14333	null
coad.tcga	chr8q22.3-q24.11	NUDCD1	EMC2	YWHAZ	MED30	DCAF13	SLC25A32	RAD21	ENY2	EIF3E	ATP6V1C1	UTP23	UBR5	EIF3H	EBAG9	0.553582
ov.gse9891	chr8q22.2-q23.1	EMC2	UBR5	SLC25A32	AZIN1	ATP6V1C1	RNF19A	STK3	ZNF706	DCAF13	COX6C	POLR2K	OXR1	YWHAZ	FZD6	0.649866
ov.tcga	null
Top genes:	EMC2:3	NUDCD1:2	ENY2:2	MED30:2	RAD21:2	EBAG9:2	UTP23:2	YWHAZ:2	DCAF13:2	SLC25A32:2
124	chr14q12	3	0.55318
brca.gse2034	null
brca.tcga	null
coad.gse14333	chr14q12-q21.1	SCFD1	SNX6	SRP54	GEMIN2	BRMS1L	TRAPPC6B	EAPP	G2E3	BAZ1A	STRN3	C14orf126	PSMA6	HECTD1	RALGAPA1	0.553335
coad.tcga	chr14q12-q13.2	AP4S1	BRMS1L	SNX6	G2E3	SCFD1	PSMA6	EAPP	SRP54	KIAA0391	STRN3	ARHGAP5	CFL2	BAZ1A	STXBP6	0.576442
ov.gse9891	chr14q12	KHNYN	TINF2	GMPR2	TM9SF1	NEDD8	CHMP4A	SCFD1	IPO4	AP4S1	C14orf21	HEATR5A	SDR39U1	G2E3	IRF9	0.55318
ov.tcga	null
Top genes:	SCFD1:3	G2E3:3	SNX6:2	SRP54:2	BRMS1L:2	EAPP:2	BAZ1A:2	STRN3:2	PSMA6:2	AP4S1:2
125	chr12p13.31	3	0.542742
brca.gse2034	null
brca.tcga	chr12p13.32-p13.31	NCAPD2	NOP2	TPI1	RAD51AP1	CDCA3	GAPDH	MRPL51	NDUFA9	MLF2	ZNF384	LTBR	DYRK4	USP5	ING4	0.631678
coad.gse14333	null
coad.tcga	null
ov.gse9891	chr12p13.31	MRPL51	NOP2	USP5	MLF2	ZNF384	NCAPD2	GAPDH	ING4	TPI1	CDCA3	COPS7A	PTMS	SPSB2	C12orf57	0.632491
ov.tcga	chr12p13.31	EMG1	TPI1	NECAP1	MLF2	PHB2	COPS7A	PEX5	LPCAT3	USP5	LRRC23	CDCA3	PTPN6	FOXJ2	PTMS	0.542742
Top genes:	TPI1:3	CDCA3:3	MLF2:3	USP5:3	NCAPD2:2	NOP2:2	GAPDH:2	MRPL51:2	ZNF384:2	ING4:2
126	chr19q13.41	3	0.526455
brca.gse2034	null
brca.tcga	chr19q13.33-q13.41	KLK8	KLK6	KLK5	KLK10	KLK7	KLK11	KLK13	KLK12	KLK1	POLD1	SPIB	KLK9	CLEC11A	C19orf48	0.663481
coad.gse14333	null
coad.tcga	chr19q13.41	FPR3	FPR2	FPR1	SIGLEC9	SIGLEC7	CD33	SIGLEC5	NKG7	SIGLEC10	SIGLEC12	SIGLEC8	KLK10	KLK9	KLK11	0.654209
ov.gse9891	chr19q13.41	SIGLEC10	NKG7	CD33	SIGLEC7	FPR1	SIGLEC9	SIGLEC5	FPR2	SIGLEC8	HAS1	KLK7	SIGLEC17P	KLK10	KLK13	0.526455
ov.tcga	null
Top genes:	KLK10:3	KLK7:2	KLK11:2	KLK13:2	KLK9:2	FPR2:2	FPR1:2	SIGLEC9:2	SIGLEC7:2	CD33:2
127	chr17q23.1	3	0.523014
brca.gse2034	null
brca.tcga	chr17q22-q23.2	CLTC	APPBP2	HEATR6	RPS6KB1	DHX40	USP32	VMP1	SMG8	PTRH2	TRIM37	TUBD1	SUPT4H1	MTMR4	GDPD1	0.631597
coad.gse14333	null
coad.tcga	chr17q22-q23.3	CLTC	RPS6KB1	TLK2	TRIM37	PPM1D	APPBP2	USP32	HEATR6	DHX40	SMG8	PTRH2	DCAF7	MED13	INTS2	0.523014
ov.gse9891	chr17q23.1-q23.3	CLTC	APPBP2	RPS6KB1	MED13	HEATR6	INTS2	DHX40	TUBD1	PTRH2	PPM1D	TLK2	USP32	FTSJ3	PSMC5	0.623976
ov.tcga	null
Top genes:	CLTC:3	APPBP2:3	HEATR6:3	RPS6KB1:3	DHX40:3	USP32:3	PTRH2:3	SMG8:2	TRIM37:2	TUBD1:2
128	chr10q22.2	3	0.509961
brca.gse2034	chr10q22.1-q22.3	VDAC2	ECD	ANXA7	MRPS16	ADK	DNAJC9	FAM149B1	SEC24C	CAMK2G	MICU1	P4HA1	DLG5	PPP3CB	KIAA0913	0.509961
brca.tcga	null
coad.gse14333	null
coad.tcga	null
ov.gse9891	chr10q22.1-q22.2	CHCHD1	MICU1	AP3M1	SEC24C	ANXA7	CAMK2G	ECD	MRPS16	NDST2	PPP3CB	MCU	VCL	ANAPC16	ASCC1	0.569518
ov.tcga	chr10q22.2-q22.3	ANXA7	PPIF	MRPS16	PPP3CB	VDAC2	DNAJC9	ADK	CAMK2G	DLG5	RPS24	NDST2	ZMIZ1	SEC24C	VCL	0.528417
Top genes:	ANXA7:3	MRPS16:3	SEC24C:3	CAMK2G:3	PPP3CB:3	VDAC2:2	ECD:2	ADK:2	DNAJC9:2	MICU1:2
129	chr1q21.3	3	0.508167
brca.gse2034	chr1q21.3-q22	JTB	SCAMP3	FLAD1	HAX1	UBE2Q1	PMVK	ADAR	UBAP2L	CLK2	SHC1	FAM189B	MTX1	CKS1B	DPM3	0.526512
brca.tcga	null
coad.gse14333	null
coad.tcga	null
ov.gse9891	chr1q21.3-q22	FLAD1	SCAMP3	KRTCAP2	HAX1	JTB	UBAP2L	MTX1	SLC50A1	C1orf43	CKS1B	PYGO2	ADAR	DENND4B	CRTC2	0.508167
ov.tcga	chr1q21.3-q22	CKS1B	ILF2	FLAD1	HAX1	JTB	C1orf43	RPS27	CHTOP	UBE2Q1	EFNA4	UBAP2L	PMVK	S100A13	SLC39A1	0.518471
Top genes:	JTB:3	FLAD1:3	HAX1:3	UBAP2L:3	CKS1B:3	SCAMP3:2	UBE2Q1:2	PMVK:2	ADAR:2	MTX1:2
130	chr20q11.23	3	0.506597
brca.gse2034	null
brca.tcga	chr20q11.22-q11.23	CTNNBL1	TTI1	MANBAL	ACTR5	RALGAPB	SNHG11	RPRD1B	C20orf4	BLCAP	PHF20	NDRG3	NFS1	C20orf24	DSN1	0.506597
coad.gse14333	null
coad.tcga	null
ov.gse9891	chr20q11.23-q11.23	RPRD1B	DHX35	C20orf4	CTNNBL1	TTI1	RPN2	ACTR5	RALGAPB	MANBAL	SNHG11	NDRG3	DLGAP4	DSN1	TGIF2	0.541173
ov.tcga	chr20q11.22-q11.23	C20orf4	UQCC	EIF6	ERGIC3	NFS1	CPNE1	TGIF2	TTI1	EDEM2	PHF20	CTNNBL1	RBM39	NDRG3	RPN2	0.554922
Top genes:	CTNNBL1:3	TTI1:3	C20orf4:3	NDRG3:3	MANBAL:2	ACTR5:2	RALGAPB:2	SNHG11:2	RPRD1B:2	PHF20:2
131	chr1q42.13	3	0.504505
brca.gse2034	null
brca.tcga	null
coad.gse14333	chr1q42.13-q42.2	NUP133	C1orf124	EXOC8	TSNAX	RAB4A	TRIM11	ABCB10	C1orf131	ARF1	GALNT2	EGLN1	TTC13	GNPAT	URB2	0.512933
coad.tcga	chr1q42.13-q42.3	RAB4A	TOMM20	TSNAX	C1orf131	COG2	EXOC8	ARV1	GNPAT	C1orf124	NUP133	C1orf31	TTC13	ABCB10	EGLN1	0.504505
ov.gse9891	null
ov.tcga	chr1q42.13-q42.3	NUP133	COG2	GGPS1	URB2	RBM34	GNPAT	TSNAX	TTC13	TOMM20	TARBP1	TAF5L	ARID4B	EGLN1	GALNT2	0.530224
Top genes:	NUP133:3	TSNAX:3	EGLN1:3	TTC13:3	GNPAT:3	C1orf124:2	EXOC8:2	RAB4A:2	ABCB10:2	C1orf131:2
132	chr8q21.11	3	0.503216
brca.gse2034	chr8q21.11-q21.2	TCEB1	ZFAND1	TMEM70	MRPS28	PEX2	IMPA1	TPD52	STAU2	ZBTB10	SNX16	E2F5	RPL7	UBE2W	PKIA	0.590857
brca.tcga	chr8q13.1-q21.12	TMEM70	COPS5	TCEB1	ARFGEF1	UBE2W	TERF1	PEX2	LACTB2	STAU2	TRAM1	CSPP1	NCOA2	JPH1	ZC2HC1A	0.59611
coad.gse14333	null
coad.tcga	null
ov.gse9891	null
ov.tcga	chr8q13.1-q21.11	TCEB1	TMEM70	UBE2W	COPS5	TRAM1	TERF1	STAU2	LACTB2	ARFGEF1	SGK3	NCOA2	CSPP1	LY96	PTTG3P	0.503216
Top genes:	TCEB1:3	TMEM70:3	STAU2:3	UBE2W:3	PEX2:2	COPS5:2	ARFGEF1:2	TERF1:2	LACTB2:2	TRAM1:2
133	chr5q13.2	3	0.500597
brca.gse2034	null
brca.tcga	chr5q13.2-q13.3	BTF3	ANKRA2	TAF9	MRPS36	CDK7	RAD17	UTP15	MRPS27	NSA2	PTCD2	MARVELD2	GFM2	FCHO2	CCDC125	0.558825
coad.gse14333	chr5q12.1-q13.2	CCNB1	DEPDC1B	CENPH	CENPK	TAF9	KIF2A	MARVELD2	C5orf43	CDK7	SLC30A5	DIMT1	CWC27	CCDC125	RAD17	0.564467
coad.tcga	null
ov.gse9891	null
ov.tcga	chr5q11.2-q13.2	TAF9	SLC30A5	KIF2A	PPWD1	CDK7	C5orf44	TRIM23	DIMT1	SREK1	ERBB2IP	ERCC8	CCNB1	SREK1IP1	IL6ST	0.500597
Top genes:	TAF9:3	CDK7:3	RAD17:2	MARVELD2:2	CCDC125:2	CCNB1:2	KIF2A:2	SLC30A5:2	DIMT1:2	BTF3:1
134	chr11q23.3	3	0.49501
brca.gse2034	null
brca.tcga	null
coad.gse14333	chr11q23.3	H2AFX	DPAGT1	SLC37A4	HMBS	UBE4A	ARCN1	HYOU1	HINFP	TRAPPC4	RPS25	MLL	MPZL2	PCSK7	CEP164	0.49501
coad.tcga	null
ov.gse9891	chr11q23.3-q24.1	DPAGT1	TRAPPC4	HMBS	HYOU1	HINFP	RNF26	SLC37A4	VPS11	ARHGEF12	H2AFX	ZNF202	TMEM136	TBCEL	SC5DL	0.515786
ov.tcga	chr11q23.3	DPAGT1	SLC37A4	HINFP	TRAPPC4	HMBS	ATP5L	ARCN1	IFT46	NLRX1	VPS11	HYOU1	ARHGEF12	C2CD2L	SC5DL	0.495777
Top genes:	DPAGT1:3	SLC37A4:3	HMBS:3	HYOU1:3	HINFP:3	TRAPPC4:3	H2AFX:2	ARCN1:2	VPS11:2	ARHGEF12:2
135	chr16q12.1	3	0.494868
brca.gse2034	null
brca.tcga	null
coad.gse14333	chr16p11.2-q12.1	BRD7	LONP2	PAPD5	VPS35	DNAJA2	SIAH1	HEATR3	C16orf87	PHKB	CNEP1R1	C16orf58	ITFG1	ORC6	SHCBP1	0.565358
coad.tcga	null
ov.gse9891	chr16q11.2-q12.1	BRD7	VPS35	PAPD5	ITFG1	SIAH1	CNEP1R1	DNAJA2	C16orf87	LONP2	N4BP1	PHKB	ORC6	NETO2	GPT2	0.505006
ov.tcga	chr16q11.2-q12.2	ITFG1	BRD7	AKTIP	PHKB	DNAJA2	SIAH1	VPS35	N4BP1	RBL2	HEATR3	FTO	CHD9	CYLD	RPGRIP1L	0.494868
Top genes:	BRD7:3	VPS35:3	DNAJA2:3	SIAH1:3	PHKB:3	ITFG1:3	LONP2:2	PAPD5:2	HEATR3:2	C16orf87:2
136	chr5q12.3	3	0.494344
brca.gse2034	chr5q12.1-q13.2	SREK1	TAF9	ERBB2IP	C5orf44	CDK7	RAD17	SLC30A5	PPWD1	TRIM23	ERCC8	DIMT1	MAST4	SREK1IP1	OCLN	0.559043
brca.tcga	null
coad.gse14333	null
coad.tcga	chr5q12.1-q13.2	CENPK	CCNB1	DIMT1	C5orf44	TAF9	NDUFAF2	CENPH	KIF2A	ERCC8	MRPS36	SREK1IP1	CDK7	SLC30A5	SMN1	0.494344
ov.gse9891	chr5q11.2-q13.1	PPWD1	ERBB2IP	CWC27	C5orf44	IPO11	C5orf43	SREK1IP1	MIER3	GPBP1	SREK1	KIF2A	SLC30A5	TRIM23	ZSWIM6	0.540737
ov.tcga	null
Top genes:	C5orf44:3	SLC30A5:3	SREK1IP1:3	SREK1:2	TAF9:2	ERBB2IP:2	CDK7:2	PPWD1:2	TRIM23:2	ERCC8:2
137	chr22q13.2	3	0.492894
brca.gse2034	null
brca.tcga	null
coad.gse14333	chr22q13.2	MCAT	TTLL12	RANGAP1	XRCC6	CENPM	BIK	DESI1	POLR3H	NHP2L1	TSPO	POLDIP3	ACO2	TCF20	PACSIN2	0.543683
coad.tcga	chr22q13.2	PACSIN2	POLDIP3	TTLL12	TCF20	SREBF2	TOB2	ZC3H7B	XRCC6	NAGA	POLR3H	TEF	CYB5R3	ARFGAP3	CCDC134	0.492894
ov.gse9891	chr22q13.2	MCAT	PACSIN2	TSPO	DESI1	TTLL12	POLDIP3	XRCC6	C22orf32	NHP2L1	PMM1	ACO2	POLR3H	NAGA	CYB5R3	0.51391
ov.tcga	null
Top genes:	TTLL12:3	XRCC6:3	POLR3H:3	POLDIP3:3	PACSIN2:3	MCAT:2	DESI1:2	NHP2L1:2	TSPO:2	ACO2:2
138	chrXp22.12	3	0.492881
brca.gse2034	null
brca.tcga	null
coad.gse14333	chrXp22.2-p21.3	PDHA1	POLA1	RBBP7	SCML1	SCML2	PRDX4	SMS	EIF1AX	RPS6KA3	APOO	PDK3	MBTPS2	CXorf23	PHKA2	0.54515
coad.tcga	null
ov.gse9891	chrXp22.2-p22.12	EIF1AX	TRAPPC2	OFD1	RBBP7	TXLNG	CTPS2	SYAP1	GEMIN8	PIGA	PHKA2	CXorf23	RAB9A	SCML2	CA5BP1	0.564013
ov.tcga	chrXp22.2-p22.11	EIF1AX	MAP3K15	PIGA	RBBP7	PDHA1	SMS	MOSPD2	RPS6KA3	PHKA2	CTPS2	SCML1	PIR	ZRSR2	TXLNG	0.492881
Top genes:	RBBP7:3	EIF1AX:3	PHKA2:3	PDHA1:2	SCML1:2	SCML2:2	SMS:2	RPS6KA3:2	CXorf23:2	TXLNG:2
139	chr4q13.3	3	0.48863
brca.gse2034	null
brca.tcga	null
coad.gse14333	chr4q13.3-q21.1	GRSF1	UTP3	DCK	USO1	RCHY1	ANKRD17	COX18	THAP6	MOB1B	G3BP2	BTC	RASSF6	MTHFD2L	PARM1	0.573452
coad.tcga	chr4q13.3	CXCL1	IL8	CXCL2	CXCL6	CXCL3	CXCL5	PPBP	PF4V1	DCK	SMR3A	PF4	SMR3B	FDCSP	AFP	0.48863
ov.gse9891	chr4q13.3-q21.1	ANKRD17	NUP54	RCHY1	COX18	G3BP2	SDAD1	USO1	SCARB2	THAP6	MTHFD2L	ALB	SHROOM3	BTC	SEPT11	0.536932
ov.tcga	null
Top genes:	DCK:2	USO1:2	RCHY1:2	ANKRD17:2	COX18:2	THAP6:2	G3BP2:2	BTC:2	MTHFD2L:2	GRSF1:1
140	chr9q32	3	0.48815
brca.gse2034	null
brca.tcga	null
coad.gse14333	chr9q32	POLE3	C9orf80	PRPF4	PTBP3	SLC31A1	CDC26	HDHD3	BSPRY	FKBP15	ATP6V1G1	ALAD	SNX30	HSDL2	C9orf91	0.48815
coad.tcga	null
ov.gse9891	chr9q32-q33.1	CDC26	ATP6V1G1	POLE3	SLC31A1	ALAD	HDHD3	PRPF4	FKBP15	PTBP3	C9orf80	TRIM32	BSPRY	SNX30	HSDL2	0.522967
ov.tcga	chr9q32-q33.1	POLE3	PRPF4	HDHD3	TRIM32	SLC31A1	BSPRY	FKBP15	HSDL2	ATP6V1G1	ALAD	SLC31A2	PTBP3	C9orf91	RGS3	0.532812
Top genes:	POLE3:3	PRPF4:3	PTBP3:3	SLC31A1:3	HDHD3:3	BSPRY:3	FKBP15:3	ATP6V1G1:3	ALAD:3	HSDL2:3
141	chr7q11.21	3	0.486748
brca.gse2034	null
brca.tcga	chr7p11.2-q11.21	ZNF117	ZNF479	ZNF680	ZNF107	ZNF92	ZNF138	ZNF273	VSTM2A	GBAS	VOPP1	LANCL2	SEPT14	PSPH	CHCHD2	0.50911
coad.gse14333	null
coad.tcga	chr7q11.21-q11.23	ZNF107	ZNF680	ZNF92	ZNF117	ZNF138	ZNF273	TYW1B	CRCP	TMEM248	NSUN5P2	POM121	ASL	STAG3L4	GUSB	0.488691
ov.gse9891	chr7p11.2-q11.21	ZNF138	ZNF680	ZNF107	ZNF92	ZNF273	ZNF117	CCT6P3	TMEM248	CCT6A	CRCP	RABGEF1	GUSB	TPST1	CHCHD2	0.486748
ov.tcga	null
Top genes:	ZNF117:3	ZNF680:3	ZNF107:3	ZNF92:3	ZNF138:3	ZNF273:3	CHCHD2:2	CRCP:2	TMEM248:2	GUSB:2
142	chr19p13.3	3	0.484007
brca.gse2034	chr19p13.3	HMG20B	CCDC94	FZR1	MAP2K2	UBXN6	C19orf10	DAPK3	SH3GL1	NFIC	EEF2	PIAS4	NCLN	CHAF1A	PIP5K1C	0.506002
brca.tcga	chr19p13.3	MAP2K2	HDGFRP2	DOHH	FZR1	SIRT6	DAPK3	PIAS4	HMG20B	CCDC94	MPND	PIP5K1C	C19orf29	UBXN6	SH3GL1	0.54351
coad.gse14333	null
coad.tcga	null
ov.gse9891	null
ov.tcga	chr19p13.3	AP3D1	GNA11	PIP5K1C	MKNK2	NFIC	C19orf29	HMG20B	MFSD12	SF3A2	NCLN	BTBD2	SGTA	LMNB2	AES	0.484007
Top genes:	HMG20B:3	PIP5K1C:3	CCDC94:2	FZR1:2	MAP2K2:2	UBXN6:2	DAPK3:2	SH3GL1:2	NFIC:2	PIAS4:2
143	chr19p13.11	3	0.482801
brca.gse2034	chr19p13.11	COPE	UPF1	LSM4	DDX49	ATP13A1	RFXANK	SUGP2	LPAR2	ISYNA1	MAU2	FKBP8	UBA52	NDUFA13	ELL	0.482801
brca.tcga	null
coad.gse14333	chr19p13.11	RFXANK	KXD1	NR2C2AP	ATP13A1	COPE	DDX49	UPF1	LPAR2	SUGP1	TMEM161A	ZNF101	ARMC6	C19orf60	NDUFA13	0.575669
coad.tcga	null
ov.gse9891	null
ov.tcga	chr19p13.11	ATP13A1	GATAD2A	DDX49	UPF1	TMEM161A	SUGP1	MAU2	KLHL26	ARMC6	LPAR2	RFXANK	ZNF14	COPE	NDUFA13	0.530363
Top genes:	COPE:3	UPF1:3	DDX49:3	ATP13A1:3	RFXANK:3	LPAR2:3	NDUFA13:3	MAU2:2	SUGP1:2	TMEM161A:2
144	chr2p25.3	3	0.474357
brca.gse2034	null
brca.tcga	chr2p25.3-p25.1	RNASEH1	YWHAQ	KLF11	CPSF3	PDIA6	ODC1	ADAM17	RPS7	LPIN1	ITGB1BP1	GRHL1	NOL10	RRM2	ASAP2	0.498021
coad.gse14333	null
coad.tcga	null
ov.gse9891	chr2p25.3-p25.1	RNASEH1	ACP1	CPSF3	YWHAQ	TSSC1	ADI1	RPS7	LOC100506054	TAF1B	KIDINS220	TRAPPC12	MBOAT2	ITGB1BP1	RNF144A	0.474357
ov.tcga	chr2p25.3-p25.1	ACP1	YWHAQ	RNASEH1	TAF1B	TSSC1	ADI1	ITGB1BP1	KIDINS220	ADAM17	TRAPPC12	RNF144A	RPS7	ASAP2	SH3YL1	0.543802
Top genes:	RNASEH1:3	YWHAQ:3	RPS7:3	ITGB1BP1:3	CPSF3:2	ADAM17:2	ASAP2:2	ACP1:2	TSSC1:2	ADI1:2
145	chr16p11.2	3	0.46941
brca.gse2034	null
brca.tcga	chr16p12.1-p11.2	RABEP2	TUFM	SPNS1	GTF3C1	KIF22	SH2B1	XPO6	CLN3	ATXN2L	NFATC2IP	SULT1A1	KIAA0556	SULT1A2	NSMCE1	0.46941
coad.gse14333	chr16p12.1-p11.2	XPO6	SPNS1	GTF3C1	NSMCE1	SH2B1	CLN3	LCMT1	TUFM	RABEP2	KIAA0556	NFATC2IP	SULT1A2	CCDC101	IL4R	0.540933
coad.tcga	null
ov.gse9891	null
ov.tcga	chr16p12.2-p11.2	XPO6	GTF3C1	NFATC2IP	RBBP6	SH2B1	KIAA0556	RABEP2	ARHGAP17	PALB2	ATXN2L	CCDC101	CLN3	SULT1A1	TUFM	0.523836
Top genes:	RABEP2:3	TUFM:3	GTF3C1:3	SH2B1:3	XPO6:3	CLN3:3	NFATC2IP:3	KIAA0556:3	SPNS1:2	ATXN2L:2
146	chr13q12.13	3	0.456165
brca.gse2034	chr13q12.11-q12.3	MTMR6	EFHA1	RNF6	POLR1D	GTF3A	POMP	MIPEP	SACS	SLC46A3	USP12	PARP4	SGCG	WASF3	ATP8A2	0.478712
brca.tcga	null
coad.gse14333	null
coad.tcga	chr13q12.13-q12.3	RNF6	LNX2	PAN3	POLR1D	MTIF3	RPL21	HMGB1	POMP	GTF3A	NUPL1	SLC7A1	CDK8	UBL3	USPL1	0.603013
ov.gse9891	null
ov.tcga	chr13q12.12-q12.3	MTMR6	USPL1	RPL21	GTF3A	POLR1D	POMP	UBL3	RNF6	PARP4	HMGB1	SLC46A3	USP12	WASF3	SLC7A1	0.456165
Top genes:	RNF6:3	POLR1D:3	GTF3A:3	POMP:3	MTMR6:2	SLC46A3:2	USP12:2	PARP4:2	WASF3:2	RPL21:2
147	chr14q32.12	3	0.453165
brca.gse2034	null
brca.tcga	chr14q32.12-q32.13	UBR7	C14orf109	C14orf142	GOLGA5	TRIP11	GLRX5	CPSF2	NDUFB1	BTBD7	CLMN	MOAP1	ITPK1	DDX24	ATXN3	0.453165
coad.gse14333	chr14q24.3-q32.12	SMEK1	SPTLC2	SNW1	TC2N	TRIP11	PSMC1	ATXN3	SEL1L	ZC3H14	CALM1	AHSA1	EFCAB11	CEP128	C14orf159	0.592855
coad.tcga	null
ov.gse9891	null
ov.tcga	chr14q31.3-q32.12	GOLGA5	UBR7	C14orf109	ZC3H14	TDP1	DDX24	CALM1	ATXN3	PSMC1	SMEK1	MOAP1	LGMN	RPS6KA5	TRIP11	0.500955
Top genes:	TRIP11:3	ATXN3:3	UBR7:2	C14orf109:2	GOLGA5:2	MOAP1:2	DDX24:2	SMEK1:2	PSMC1:2	ZC3H14:2
148	chr4q24	3	0.451035
brca.gse2034	null
brca.tcga	null
coad.gse14333	chr4q23-q24	UBE2D3	PPA2	EIF4E	H2AFZ	INTS12	METAP1	CISD2	LAMTOR3	RAP1GDS1	GSTCD	ADH5	AIMP1	MANBA	DNAJB14	0.55218
coad.tcga	chr4q22.3-q24	UBE2D3	PPA2	CISD2	H2AFZ	EIF4E	METAP1	ADH5	LAMTOR3	CENPE	DAPP1	RG9MTD2	TET2	RAP1GDS1	SMARCAD1	0.451035
ov.gse9891	null
ov.tcga	chr4q23-q25	UBE2D3	INTS12	AIMP1	LAMTOR3	EIF4E	PPA2	METAP1	ADH5	HADH	H2AFZ	DNAJB14	BDH2	NFKB1	MANBA	0.617408
Top genes:	UBE2D3:3	PPA2:3	EIF4E:3	H2AFZ:3	METAP1:3	LAMTOR3:3	ADH5:3	INTS12:2	CISD2:2	RAP1GDS1:2
149	chr9p13.3	3	0.447767
brca.gse2034	chr9p13.3-p13.2	STOML2	FANCG	MELK	CLTA	POLR1E	ZBTB5	CA9	VCP	TESK1	GRHPR	RNF38	GNE	TPM2	PIGO	0.447767
brca.tcga	null
coad.gse14333	null
coad.tcga	chr9p13.3	GLIPR2	CCL21	CCL19	DNAJB5	CD72	SIT1	TPM2	FAM214B	CREB3	TLN1	RECK	CCIN	HINT2	NPR2	0.452077
ov.gse9891	chr9p13.3-p13.2	STOML2	FANCG	HINT2	PIGO	TESK1	VCP	CLTA	CREB3	GBA2	RNF38	LOC100506710	C9orf100	MELK	CCDC107	0.554627
ov.tcga	null
Top genes:	STOML2:2	FANCG:2	MELK:2	CLTA:2	VCP:2	TESK1:2	RNF38:2	TPM2:2	PIGO:2	CREB3:2
150	chr11q12.2	3	0.444593
brca.gse2034	null
brca.tcga	chr11q12.1-q12.2	MS4A4A	LPXN	MS4A6A	MS4A1	MPEG1	MS4A7	GLYAT	MS4A14	FAM111A	PATL1	DTX4	MS4A6E	MS4A2	GLYATL2	0.555941
coad.gse14333	null
coad.tcga	chr11q12.1-q12.2	MS4A7	MS4A6A	MS4A4A	MPEG1	MS4A14	MS4A2	LPXN	ZFP91	OR10W1	FAM111A	OR4D10	MS4A6E	OR5B3	OR5A1	0.444593
ov.gse9891	chr11q12.1-q12.2	MS4A6A	MS4A4A	MPEG1	MS4A7	LPXN	MS4A14	SLC15A3	MS4A1	TMEM109	ZFP91	FAM111A	MS4A2	PATL1	MRPL16	0.722814
ov.tcga	null
Top genes:	MS4A4A:3	LPXN:3	MS4A6A:3	MPEG1:3	MS4A7:3	MS4A14:3	FAM111A:3	MS4A2:3	MS4A1:2	PATL1:2
151	chr1q22	3	0.438804
brca.gse2034	null
brca.tcga	chr1q21.3-q22	SCAMP3	FLAD1	MTX1	MSTO1	RUSC1	GBA	CLK2	FDPS	SLC50A1	DAP3	FAM189B	SHC1	UBQLN4	RAB25	0.501262
coad.gse14333	null
coad.tcga	chr1q22	CLK2	UBQLN4	RUSC1	DAP3	YY1AP1	FAM189B	ARHGEF2	GON4L	SCAMP3	SLC25A44	LMNA	MSTO1	KIAA0907	RAB25	0.455396
ov.gse9891	null
ov.tcga	chr1q22	SCAMP3	PMF1	RIT1	SSR2	LAMTOR2	RUSC1	DAP3	CCT3	SLC25A44	YY1AP1	SMG5	CLK2	BGLAP	ARHGEF2	0.438804
Top genes:	SCAMP3:3	RUSC1:3	CLK2:3	DAP3:3	MSTO1:2	FAM189B:2	UBQLN4:2	RAB25:2	YY1AP1:2	ARHGEF2:2
152	chr16q24.3	3	0.438243
brca.gse2034	chr16q24.1-q24.3	CDH15	FOXC2	DPEP1	CPNE7	MVD	FOXL1	CA5A	JPH3	CDT1	CYBA	FOXF1	ANKRD11	C16orf95	SLC7A5	0.438243
brca.tcga	chr16q24.2-q24.3	CHMP1A	MVD	CDK10	SPG7	KLHDC4	GALNS	PIEZO1	APRT	ZC3H18	RNF166	C16orf55	TRAPPC2L	BANP	CDT1	0.503432
coad.gse14333	null
coad.tcga	null
ov.gse9891	chr16q24.3	APRT	CHMP1A	CDK10	SPG7	TRAPPC2L	SPATA2L	TCF25	GAS8	C16orf55	C16orf7	RPL13	CENPBD1	AFG3L1P	GALNS	0.533647
ov.tcga	null
Top genes:	MVD:2	CDT1:2	CHMP1A:2	CDK10:2	SPG7:2	GALNS:2	APRT:2	C16orf55:2	TRAPPC2L:2	CDH15:1
153	chr1q21.3	3	0.434077
brca.gse2034	null
brca.tcga	chr1q21.3	SPRR2F	SPRR2D	SPRR1B	SPRR1A	LCE3D	SPRR2G	SMCP	IVL	LCE1C	CRCT1	FLG	LCE1F	LCE3E	LCE3B	0.434077
coad.gse14333	null
coad.tcga	chr1q21.3	SPRR2D	SPRR2F	SPRR1B	SPRR3	SPRR1A	LCE1E	TCHH	S100A10	SPRR2G	LCE3D	LELP1	CRCT1	IVL	LCE4A	0.503889
ov.gse9891	chr1q21.3	SPRR4	SMCP	LCE1E	PGLYRP4	SPRR2G	IVL	LELP1	PGLYRP3	SPRR3	LOR	SPRR1B	S100A5	LCE1B	SPRR1A	0.500831
ov.tcga	null
Top genes:	SPRR1B:3	SPRR1A:3	SPRR2G:3	IVL:3	SPRR2F:2	SPRR2D:2	LCE3D:2	SMCP:2	CRCT1:2	SPRR3:2
154	chr5q31.3	3	0.430502
brca.gse2034	chr5q31.2-q31.3	HARS2	UBE2D2	IK	NDUFA2	ETF1	CTNNA1	ANKHD1	HSPA9	PFDN1	SIL1	HARS	PURA	MATR3	TMCO6	0.430502
brca.tcga	null
coad.gse14333	null
coad.tcga	null
ov.gse9891	chr5q31.2-q31.3	HARS	ETF1	SLC35A4	NDUFA2	SRA1	HSPA9	ZMAT2	IK	UBE2D2	HARS2	ANKHD1	PFDN1	SIL1	CYSTM1	0.522478
ov.tcga	chr5q31.2-q31.3	HARS2	HARS	IK	ETF1	HSPA9	UBE2D2	PFDN1	FAM53C	CTNNA1	KDM3B	PURA	SIL1	MATR3	NDUFA2	0.523177
Top genes:	HARS2:3	UBE2D2:3	IK:3	NDUFA2:3	ETF1:3	HSPA9:3	PFDN1:3	SIL1:3	HARS:3	CTNNA1:2
155	chr14q11.2	3	0.429606
brca.gse2034	chr14q11.2	OXA1L	SUPT16H	RBM23	DAD1	PRMT5	TOX4	LRP10	METTL3	ACIN1	CHD8	HAUS4	METTL17	PSMB5	HNRNPC	0.429606
brca.tcga	null
coad.gse14333	null
coad.tcga	null
ov.gse9891	chr14q11.2	METTL17	METTL3	TOX4	TMEM55B	CHD8	RAB2B	APEX1	SUPT16H	RBM23	ZNF219	OXA1L	ARHGEF40	HNRNPC	MRPL52	0.600832
ov.tcga	chr14q11.2	NGDN	PRMT5	DAD1	RBM23	PSMB5	OXA1L	THTPA	HAUS4	DCAF11	BCL2L2	LRP10	ABHD4	MRPL52	ACIN1	0.617096
Top genes:	OXA1L:3	RBM23:3	SUPT16H:2	DAD1:2	PRMT5:2	TOX4:2	LRP10:2	METTL3:2	ACIN1:2	CHD8:2
156	chr17p11.2	3	0.427968
brca.gse2034	null
brca.tcga	chr17p12-p11.2	SMCR7	ALKBH5	ATPAF2	RAI1	DRG2	MED9	TOP3A	FLII	TTC19	SHMT1	TOM1L2	NCOR1	PEMT	COPS3	0.497309
coad.gse14333	chr17p11.2	PRPSAP2	DHRS7B	USP22	FLII	ATPAF2	SMCR8	ALDH3A2	ALKBH5	DRG2	C17orf39	SHMT1	TOP3A	AKAP10	EPN2	0.427968
coad.tcga	chr17p11.2	FLII	RAI1	MPRIP	ALKBH5	TOM1L2	SREBF1	TOP3A	MED9	SMCR7	ZNF624	COPS3	ATPAF2	FLCN	SHMT1	0.504352
ov.gse9891	null
ov.tcga	null
Top genes:	ALKBH5:3	ATPAF2:3	TOP3A:3	FLII:3	SHMT1:3	SMCR7:2	RAI1:2	DRG2:2	MED9:2	TOM1L2:2
157	chr10q22.1	3	0.422605
brca.gse2034	null
brca.tcga	chr10q22.1-q22.2	TYSND1	ECD	SAR1A	MRPS16	DNAJB12	PCBD1	HK1	EIF4EBP2	PPA1	ANAPC16	SGPL1	C10orf35	SUPV3L1	MICU1	0.457156
coad.gse14333	chr10q22.1-q22.2	VPS26A	PCBD1	DNAJC9	DDX21	MRPS16	ECD	SUPV3L1	PPA1	ASCC1	AIFM2	KIAA1279	ANAPC16	SGPL1	DNAJB12	0.608089
coad.tcga	chr10q22.1	SRGN	C10orf54	PSAP	PRF1	SGPL1	SPOCK2	MCU	TSPAN15	COL13A1	SAR1A	UNC5B	TACR2	KIAA1279	MICU1	0.422605
ov.gse9891	null
ov.tcga	null
Top genes:	SGPL1:3	ECD:2	SAR1A:2	MRPS16:2	DNAJB12:2	PCBD1:2	PPA1:2	ANAPC16:2	SUPV3L1:2	MICU1:2
158	chr11q13.1	3	0.421884
brca.gse2034	chr11q13.1	DNAJC4	OTUB1	MARK2	STIP1	VEGFB	NAA40	BAD	GPR137	ZFPL1	MEN1	SF1	MAP4K2	FKBP2	PPP2R5B	0.496057
brca.tcga	chr11q13.1	NUDT22	TRPT1	BAD	PRDX5	TRMT112	DNAJC4	FKBP2	COX8A	OTUB1	RTN3	GPR137	RPS6KA4	VEGFB	MAP4K2	0.476989
coad.gse14333	chr11q12.3-q13.1	RTN3	STIP1	FKBP2	OTUB1	COX8A	TRMT112	NUDT22	NAA40	BAD	SNHG1	SLC3A2	STX5	MARK2	WDR74	0.421884
coad.tcga	null
ov.gse9891	null
ov.tcga	null
Top genes:	OTUB1:3	BAD:3	FKBP2:3	DNAJC4:2	MARK2:2	STIP1:2	VEGFB:2	NAA40:2	GPR137:2	MAP4K2:2
159	chr19q13.11	3	0.421319
brca.gse2034	chr19q12-q13.12	CEBPG	ANKRD27	CCNE1	PDCD5	UBA2	LSM14A	GPATCH1	GPI	LRP3	PEPD	C19orf40	KCTD15	KIAA0355	FXYD3	0.421319
brca.tcga	null
coad.gse14333	chr19q13.11	LSM14A	ANKRD27	CEBPG	UBA2	GPATCH1	PDCD2L	PDCD5	ZNF302	NUDT19	CEP89	DPY19L3	RHPN2	CEBPA	ZNF30	0.589668
coad.tcga	null
ov.gse9891	chr19q12-q13.11	ANKRD27	PDCD5	GPATCH1	ZNF507	NUDT19	CEP89	CEBPG	PEPD	C19orf40	RHPN2	LSM14A	PDCD2L	URI1	C19orf12	0.652668
ov.tcga	null
Top genes:	CEBPG:3	ANKRD27:3	PDCD5:3	LSM14A:3	GPATCH1:3	UBA2:2	PEPD:2	C19orf40:2	PDCD2L:2	NUDT19:2
160	chr6q22.1	3	0.420867
brca.gse2034	null
brca.tcga	chr6q21-q22.31	ZUFSP	GOPC	HDAC2	NUS1	HSF2	KPNA5	MCM9	RWDD1	FAM184A	FRK	C6orf170	TSPYL1	NT5DC1	TSPYL4	0.475451
coad.gse14333	chr6q21-q22.31	DSE	LAMA4	GJA1	PLN	COL10A1	FAM26E	C6orf225	SERINC1	CEP85L	TSPYL4	FAM26F	KPNA5	MAN1A1	MARCKS	0.506939
coad.tcga	chr6q22.1-q22.33	DSE	RSPO3	FAM26E	PLN	FAM26F	GJA1	FAM162B	MAN1A1	SERINC1	NUS1	PKIB	CEP85L	DCBLD1	RFX6	0.420867
ov.gse9891	null
ov.tcga	null
Top genes:	NUS1:2	KPNA5:2	TSPYL4:2	DSE:2	GJA1:2	PLN:2	FAM26E:2	SERINC1:2	CEP85L:2	FAM26F:2
161	chr4q21.1	3	0.41897
brca.gse2034	chr4q13.3-q21.1	G3BP2	RCHY1	ANKRD17	GRSF1	NUP54	SDAD1	USO1	SCARB2	DCK	MTHFD2L	NAAA	RUFY3	EREG	ADAMTS3	0.41897
brca.tcga	chr4q13.3-q21.1	G3BP2	NUP54	RCHY1	SCARB2	USO1	SDAD1	MTHFD2L	COX18	ANKRD17	CCNG2	STBD1	CCNI	NAAA	SEPT11	0.448439
coad.gse14333	null
coad.tcga	null
ov.gse9891	null
ov.tcga	chr4q13.3-q21.1	G3BP2	NUP54	USO1	RCHY1	GRSF1	SCARB2	DCK	SDAD1	ANKRD17	MTHFD2L	STBD1	BTC	NAAA	RUFY3	0.489513
Top genes:	G3BP2:3	RCHY1:3	ANKRD17:3	NUP54:3	SDAD1:3	USO1:3	SCARB2:3	MTHFD2L:3	NAAA:3	GRSF1:2
162	chr14q32.32	3	0.418051
brca.gse2034	chr14q32.31-q32.33	MARK3	KLC1	RCOR1	PPP2R5C	BAG5	CDC42BPB	EIF5	DYNC1H1	TECPR2	HSP90AA1	ZNF839	CINP	ZFYVE21	TRAF3	0.418051
brca.tcga	null
coad.gse14333	chr14q32.31-q32.33	MARK3	WDR20	BAG5	EIF5	APOPT1	CINP	RCOR1	DYNC1H1	TRAF3	PPP2R5C	ANKRD9	HSP90AA1	ZNF839	TECPR2	0.501255
coad.tcga	null
ov.gse9891	chr14q32.31-q32.33	MARK3	WDR20	APOPT1	PPP2R5C	EIF5	KLC1	BAG5	RCOR1	CINP	TECPR2	HSP90AA1	CDC42BPB	ZNF839	SNORA28	0.505235
ov.tcga	null
Top genes:	MARK3:3	RCOR1:3	PPP2R5C:3	BAG5:3	EIF5:3	TECPR2:3	HSP90AA1:3	ZNF839:3	CINP:3	KLC1:2
163	chr15q24.2	3	0.415739
brca.gse2034	chr15q24.2-q25.1	COMMD4	IMP3	PPCDC	SNUPN	HMG20A	SCAPER	RCN2	MAN2C1	PTPN9	NEIL1	WDR61	TSPAN3	C15orf39	IDH3A	0.422461
brca.tcga	chr15q24.1-q24.2	MAN2C1	IMP3	SCAMP2	FAM219B	PTPN9	EDC3	CLK3	UBL7	ULK3	SNUPN	MPI	COMMD4	SNX33	PPCDC	0.415739
coad.gse14333	null
coad.tcga	null
ov.gse9891	null
ov.tcga	chr15q24.2-q25.1	IMP3	ETFA	COMMD4	SNUPN	WDR61	PSMA4	IDH3A	HMG20A	PTPN9	PPCDC	TSPAN3	RCN2	SCAPER	IREB2	0.564024
Top genes:	COMMD4:3	IMP3:3	PPCDC:3	SNUPN:3	PTPN9:3	HMG20A:2	SCAPER:2	RCN2:2	MAN2C1:2	WDR61:2
164	chr10q24.32	3	0.413578
brca.gse2034	chr10q24.32-q24.33	TRIM8	ARL3	FBXL15	C10orf76	SLK	OBFC1	CUEDC2	CALHM2	LOC100505761	ACTR1A	HPS6	MGEA5	GBF1	TAF5	0.413578
brca.tcga	chr10q24.32	TRIM8	C10orf32	BTRC	SFXN2	WBP1L	FBXW4	ARL3	POLL	C10orf76	HPS6	FBXL15	CUEDC2	SUFU	MGEA5	0.429158
coad.gse14333	null
coad.tcga	chr10q24.31-q24.32	GBF1	BTRC	FBXW4	SUFU	PPRC1	NOLC1	NT5C2	C10orf76	HPS6	CNNM2	TRIM8	MGEA5	LZTS2	FBXL15	0.422366
ov.gse9891	null
ov.tcga	null
Top genes:	TRIM8:3	FBXL15:3	C10orf76:3	HPS6:3	MGEA5:3	ARL3:2	CUEDC2:2	GBF1:2	BTRC:2	FBXW4:2
165	chr18q21.33	3	0.408748
brca.gse2034	chr18q21.2-q21.33	VPS4B	TXNL1	NARS	KDSR	WDR7	ZCCHC2	POLI	FECH	PHLPP1	PIGN	NEDD4L	PMAIP1	BCL2	ZNF532	0.408748
brca.tcga	null
coad.gse14333	chr18q21.31-q21.33	KIAA1468	VPS4B	NARS	PHLPP1	TXNL1	TNFRSF11A	ZCCHC2	FECH	ATP8B1	MALT1	PIGN	WDR7	NEDD4L	KDSR	0.479651
coad.tcga	null
ov.gse9891	chr18q21.33-q22.3	VPS4B	TMX3	TIMM21	SOCS6	KDSR	LOC400657	KIAA1468	ZNF407	RTTN	CNDP2	PHLPP1	ZADH2	CYB5A	ZCCHC2	0.51168
ov.tcga	null
Top genes:	VPS4B:3	KDSR:3	ZCCHC2:3	PHLPP1:3	TXNL1:2	NARS:2	WDR7:2	FECH:2	PIGN:2	NEDD4L:2
166	chr12p12.1	3	0.400364
brca.gse2034	chr12p12.1-p11.22	RECQL	PYROXD1	CCDC91	MED21	KIAA0528	KRAS	STK38L	ETNK1	MRPS35	GOLT1B	ERGIC2	TM7SF3	ARNTL2	CMAS	0.400364
brca.tcga	chr12p12.3-p12.1	CMAS	RECQL	DERA	GOLT1B	STRAP	PYROXD1	AEBP2	LDHB	ETNK1	WBP11	SLCO1A2	ST8SIA1	BCAT1	PTPRO	0.554493
coad.gse14333	null
coad.tcga	null
ov.gse9891	null
ov.tcga	chr12p12.3-p11.23	RECQL	MED21	CMAS	PYROXD1	ASUN	KRAS	PLEKHA5	ETNK1	GOLT1B	KIAA0528	LDHB	TM7SF3	LYRM5	ITPR2	0.569521
Top genes:	RECQL:3	PYROXD1:3	ETNK1:3	GOLT1B:3	CMAS:3	MED21:2	KIAA0528:2	KRAS:2	TM7SF3:2	LDHB:2
167	chr9q31.2	3	0.399129
brca.gse2034	chr9q31.1-q32	RAD23B	IKBKAP	EPB41L4B	KIAA0368	FAM206A	PTPN3	TXN	FKTN	HSDL2	CTNNAL1	KLF4	TMEM38B	ZFP37	ABCA1	0.399129
brca.tcga	null
coad.gse14333	null
coad.tcga	chr9q31.2-q32	FKTN	DNAJC25	KIAA1958	PTBP3	TMEM245	IKBKAP	KIAA0368	RAD23B	FAM206A	PTPN3	TXN	C9orf80	HSDL2	EPB41L4B	0.403721
ov.gse9891	null
ov.tcga	chr9q22.33-q31.3	RAD23B	ZNF189	SMC2	TEX10	ERP44	SEC61B	IKBKAP	STX17	FKTN	INVS	TMEM38B	GALNT12	ABCA1	KLF4	0.499111
Top genes:	RAD23B:3	IKBKAP:3	FKTN:3	EPB41L4B:2	KIAA0368:2	FAM206A:2	PTPN3:2	TXN:2	HSDL2:2	KLF4:2
168	chr3q21.3	3	0.396309
brca.gse2034	null
brca.tcga	chr3q21.3	C3orf37	ACAD9	RUVBL1	RAB7A	ISY1	SEC61A1	MCM2	TPRA1	EEFSEC	ZXDC	RPN1	COPG1	H1FX	CHCHD6	0.396309
coad.gse14333	chr3q21.3-q22.1	C3orf37	RUVBL1	RPN1	MCM2	ISY1	PIK3R4	SEC61A1	COPG1	TPRA1	MBD4	RAB7A	ACAD9	CHCHD6	CNBP	0.527415
coad.tcga	null
ov.gse9891	chr3q21.3-q22.1	C3orf37	ACAD9	RAB7A	MBD4	PIK3R4	ISY1	DNAJC13	ASTE1	TMCC1	MRPL3	NUDT16	CNBP	NUDT16P1	ATP2C1	0.531535
ov.tcga	null
Top genes:	C3orf37:3	ACAD9:3	RAB7A:3	ISY1:3	RUVBL1:2	SEC61A1:2	MCM2:2	TPRA1:2	RPN1:2	COPG1:2
169	chrXq22.1	3	0.393622
brca.gse2034	chrXq22.1	ARMCX1	ARMCX6	ARMCX5	ARMCX2	ARMCX3	TSPAN6	GLA	GPRASP1	BEX4	BEX1	SRPX2	BHLHB9	TRMT2B	TMSB15A	0.393622
brca.tcga	chrXq22.1-q22.2	TCEAL5	TCEAL6	TCEAL3	TCEAL4	TCEAL1	SYTL4	HNRNPH2	ZMAT1	ARMCX3	GPRASP2	ARMCX5	BEX4	TCEAL2	ARMCX1	0.833481
coad.gse14333	null
coad.tcga	chrXq22.1	TCEAL8	ARMCX6	ARMCX3	ARMCX2	GPRASP2	BEX4	BHLHB9	ARMCX5	BEX2	TCEAL6	TCEAL5	GPRASP1	ARMCX1	TAF7L	0.459234
ov.gse9891	null
ov.tcga	null
Top genes:	ARMCX1:3	ARMCX5:3	ARMCX3:3	BEX4:3	ARMCX6:2	ARMCX2:2	GPRASP1:2	BHLHB9:2	TCEAL5:2	TCEAL6:2
170	chr2p13.1	3	0.393201
brca.gse2034	chr2p13.3-p13.1	MTHFD2	SNRPG	STAMBP	TPRKB	FAM136A	DGUOK	DUSP11	MPHOSPH10	ALMS1	CCT7	ZNF638	C2orf42	TIA1	VAX2	0.393201
brca.tcga	null
coad.gse14333	null
coad.tcga	null
ov.gse9891	chr2p13.1-p12	MOGS	HTRA2	AUP1	PCGF1	MRPL53	DCTN1	TTC31	DGUOK	RTKN	STAMBP	INO80B	SEMA4F	DUSP11	MRPL19	0.414202
ov.tcga	chr2p13.1-p12	STAMBP	DUSP11	TPRKB	GCFC2	HTRA2	DGUOK	PCGF1	TTC31	MRPL19	DCTN1	AUP1	MOGS	MTHFD2	INO80B	0.495096
Top genes:	STAMBP:3	DGUOK:3	DUSP11:3	MTHFD2:2	TPRKB:2	MOGS:2	HTRA2:2	AUP1:2	PCGF1:2	DCTN1:2
171	chr9p13.3	3	0.391313
brca.gse2034	null
brca.tcga	chr9p21.1-p13.3	UBE2R2	NFX1	DCAF12	UBAP2	NDUFB6	TOPORS	UBAP1	RPP25L	APTX	DCTN3	SIGMAR1	NUDT2	NOL6	DNAJA1	0.391313
coad.gse14333	chr9p21.2-p13.3	DCAF12	APTX	TOPORS	UBAP2	CAAP1	NFX1	PLAA	IFT74	BAG1	UBE2R2	CHMP5	NDUFB6	SMU1	MOB3B	0.545248
coad.tcga	null
ov.gse9891	chr9p21.3-p13.3	CHMP5	APTX	TOPORS	DNAJA1	NDUFB6	SMU1	NFX1	PLAA	MTAP	IFT74	CAAP1	KLHL9	LOC100129250	DDX58	0.554037
ov.tcga	null
Top genes:	NFX1:3	NDUFB6:3	TOPORS:3	APTX:3	UBE2R2:2	DCAF12:2	UBAP2:2	DNAJA1:2	CAAP1:2	PLAA:2
172	chr1q31.2	3	0.376651
brca.gse2034	chr1q31.2-q32.1	GLRX2	KIF14	ASPM	CDC73	UCHL5	C1orf106	RGS2	PKP1	NEK7	CAMSAP2	TROVE2	LAD1	CFH	RGS1	0.376651
brca.tcga	null
coad.gse14333	chr1q25.3-q31.3	RGS2	CFH	RGS1	FAM129A	NCF2	RGL1	RGS16	LAMC1	RGS18	HMCN1	NPL	KCNT2	PTGS2	LAMC2	0.527365
coad.tcga	null
ov.gse9891	chr1q25.3-q31.3	CDC73	C1orf27	TRMT1L	TPR	TROVE2	ZBTB41	EDEM3	UCHL5	NEK7	IVNS1ABP	RNF2	SWT1	DENND1B	PLA2G4A	0.468431
ov.tcga	null
Top genes:	CDC73:2	UCHL5:2	RGS2:2	NEK7:2	TROVE2:2	CFH:2	RGS1:2	GLRX2:1	KIF14:1	ASPM:1
173	chr9q34.11	3	0.368623
brca.gse2034	chr9q34.11	CDK9	DPM2	C9orf16	PTGES2	CIZ1	SH3GLB2	COQ4	ST6GALNAC4	SET	FPGS	GOLGA2	FAM102A	ZER1	ODF2	0.512565
brca.tcga	chr9q34.11	SLC27A4	ZER1	ZDHHC12	DPM2	PTGES2	C9orf114	COQ4	URM1	WDR34	NUP188	CIZ1	SH3GLB2	GOLGA2	TRUB2	0.523464
coad.gse14333	null
coad.tcga	chr9q34.11	COQ4	SLC27A4	WDR34	ZDHHC12	PTGES2	ENDOG	DPM2	C9orf114	FPGS	URM1	ODF2	SWI5	CIZ1	ZER1	0.368623
ov.gse9891	null
ov.tcga	null
Top genes:	DPM2:3	PTGES2:3	CIZ1:3	COQ4:3	ZER1:3	SH3GLB2:2	FPGS:2	GOLGA2:2	ODF2:2	SLC27A4:2
174	chr2q23.3	3	0.360331
brca.gse2034	chr2q22.1-q24.1	NMI	CYTIP	RND3	ARHGAP15	ZEB2	KYNU	GTDC1	ARL5A	ACVR1	MMADHC	ACVR2A	RIF1	HNMT	TNFAIP6	0.360331
brca.tcga	null
coad.gse14333	chr2q23.1-q24.2	PRPF40A	ORC4	ARL5A	MARCH7	WDSUB1	RIF1	MMADHC	ARL6IP6	STAM2	EPC2	FMNL2	PKP4	GPD2	ACVR1	0.504945
coad.tcga	null
ov.gse9891	null
ov.tcga	chr2q22.3-q24.2	ARL5A	MARCH7	ORC4	MMADHC	PRPF40A	ACVR1	STAM2	ACVR2A	MBD5	RIF1	NMI	BAZ2B	PKP4	GPD2	0.50587
Top genes:	ARL5A:3	ACVR1:3	MMADHC:3	RIF1:3	NMI:2	ACVR2A:2	PRPF40A:2	ORC4:2	MARCH7:2	STAM2:2
175	chr1p13.3	3	0.353906
brca.gse2034	null
brca.tcga	chr1p13.3-p13.2	GSTM1	GSTM2	GSTM3	GSTM5	GSTM4	AHCYL1	PPM1J	DENND2D	C1orf88	RHOC	OVGP1	FAM40A	SLC16A4	KCND3	0.480571
coad.gse14333	null
coad.tcga	chr1p13.3	AHCYL1	SLC25A24	CLCC1	GNAI3	TMEM167B	PSMA5	FAM102B	STXBP3	SARS	GSTM4	PSRC1	PRPF38B	WDR47	FAM40A	0.353906
ov.gse9891	null
ov.tcga	chr1p13.3-p13.2	PSMA5	ATP5F1	HBXIP	GNAI3	SARS	DENND2D	WDR77	CEPT1	PSRC1	AHCYL1	SORT1	LRIF1	GSTM4	RBM15	0.585472
Top genes:	GSTM4:3	AHCYL1:3	DENND2D:2	FAM40A:2	GNAI3:2	PSMA5:2	SARS:2	PSRC1:2	GSTM1:1	GSTM2:1
176	chr3p14.3	3	0.353015
brca.gse2034	chr3p21.1-p14.3	PDHB	NEK4	ACOX2	GLT8D1	APPL1	CACNA1D	SPCS1	FLNB	ARHGEF3	SFMBT1	ACTR8	DCP1A	WNT5A	ARF4	0.353015
brca.tcga	null
coad.gse14333	null
coad.tcga	null
ov.gse9891	chr3p14.3-p14.1	APPL1	FAM116A	RPP14	PDHB	PDE12	SLMAP	FAM208A	PSMD6	THOC7	KCTD6	ARF4	CCDC66	ATXN7	FLNB	0.518946
ov.tcga	chr3p14.3-p14.1	RPP14	PDHB	ARF4	UBA3	PSMD6	THOC7	SUCLG2	ARL6IP5	TMF1	ABHD6	FHIT	FLNB	C3orf14	ACOX2	0.530708
Top genes:	PDHB:3	FLNB:3	ARF4:3	ACOX2:2	APPL1:2	RPP14:2	PSMD6:2	THOC7:2	NEK4:1	GLT8D1:1
177	chr17q21.2	3	0.348791
brca.gse2034	null
brca.tcga	null
coad.gse14333	chr17q21.2	KRTAP4-2	KRTAP4-12	KRTAP4-4	KRT38	KRTAP4-9	KRTAP2-2	KRTAP17-1	KRT12	LOC730755	KRTAP1-3	KRTAP2-1	KRTAP9-9	KRTAP4-8	KRT37	0.494838
coad.tcga	chr17q21.2	KRT16	KRT33A	KRT17	KRT13	KRT19	KRT14	KRT15	KRT34	GAST	KRT32	HSPB9	KLHL11	PTRF	KRT36	0.446556
ov.gse9891	chr17q21.2	KRTAP4-5	KRTAP4-2	KRTAP4-6	KRTAP1-5	KRTAP3-1	KRTAP4-12	KRTAP17-1	KRTAP4-4	KRT36	KRTAP1-1	KRT38	KRTAP4-8	KRTAP4-9	KRTAP2-2	0.348791
ov.tcga	null
Top genes:	KRTAP4-2:2	KRTAP4-12:2	KRTAP4-4:2	KRT38:2	KRTAP4-9:2	KRTAP2-2:2	KRTAP17-1:2	KRTAP4-8:2	KRT36:2	KRT12:1
178	chr11q24.2	3	0.32896
brca.gse2034	null
brca.tcga	chr11q24.2-q24.3	EI24	DCPS	HYLS1	RPUSD4	FAM118B	SRPR	STT3A	FOXRED1	TIRAP	CHEK1	NFRKB	PUS3	TBRG1	ST3GAL4	0.422555
coad.gse14333	chr11q24.2-q24.3	ACRV1	KIRREL3-AS3	LOC100507392	DDX25	KCNJ1	PATE2	PANX3	PKNOX2	KIRREL3	NRGN	FEZ1	PATE1	KCNJ5	ESAM	0.501602
coad.tcga	chr11q24.2-q24.3	SLC37A2	FLI1	ESAM	FEZ1	ETS1	ROBO4	NRGN	ROBO3	KCNJ1	VSIG2	STT3A	SIAE	MSANTD2	FAM118B	0.32896
ov.gse9891	null
ov.tcga	null
Top genes:	FAM118B:2	STT3A:2	KCNJ1:2	NRGN:2	FEZ1:2	ESAM:2	EI24:1	DCPS:1	HYLS1:1	RPUSD4:1
179	chr11q12.1	3	0.326407
brca.gse2034	null
brca.tcga	null
coad.gse14333	null
coad.tcga	chr11q12.1	OR5J2	OR8K3	RTN4RL2	PRG2	OR5M10	OR5M9	PRG3	OR8H2	OR8J1	OR5F1	OR5I1	OR5M11	TIMM10	OR9G4	0.326407
ov.gse9891	chr11q12.1	MED19	CLP1	SSRP1	TMX2	C11orf31	ZDHHC5	TIMM10	SLC43A3	TNKS1BP1	UBE2L6	YPEL4	LRRC55	PRG2	RTN4RL2	0.494159
ov.tcga	chr11q12.1	TMX2	UBE2L6	CLP1	MRPL16	OSBP	LPXN	FAM111A	STX3	CTNND1	DTX4	SERPING1	0.424675
Top genes:	RTN4RL2:2	PRG2:2	TIMM10:2	CLP1:2	TMX2:2	UBE2L6:2	OR5J2:1	OR8K3:1	OR5M10:1	OR5M9:1
180	chr15q14	3	0.317464
brca.gse2034	null
brca.tcga	chr15q13.2-q14	EMC4	EMC7	NOP10	C15orf29	ATPBD4	ZNF770	AQR	ARHGAP11A	SLC12A6	AVEN	ULK4P1	FAN1	PGBD4	C15orf41	0.317464
coad.gse14333	chr15q13.3-q14	EMC4	EMC7	ZNF770	NOP10	AQR	ARHGAP11A	KLF13	MTMR10	AVEN	FAN1	ATPBD4	C15orf29	C15orf41	LPCAT4	0.604737
coad.tcga	null
ov.gse9891	null
ov.tcga	chr15q13.1-q14	EMC7	AVEN	AQR	NOP10	TJP1	LPCAT4	C15orf29	SLC12A6	KLF13	APBA2	ZNF770	ARHGAP11A	RYR3	GREM1	0.324893
Top genes:	EMC7:3	NOP10:3	C15orf29:3	ZNF770:3	AQR:3	ARHGAP11A:3	AVEN:3	EMC4:2	ATPBD4:2	SLC12A6:2
181	chr2q35	3	0.308123
brca.gse2034	chr2q35	SLC4A3	SPEG	WNT6	ATG9A	OBSL1	CHPF	ANKZF1	DNAJB2	DES	GMPPA	INHA	CRYBA2	TUBA4A	CDK5R2	0.370038
brca.tcga	chr2q35	CHPF	ATG9A	CNPPD1	RNF25	GMPPA	ZFAND2B	DNAJB2	STK11IP	DNPEP	ANKZF1	ABCB6	FAM134A	DES	OBSL1	0.308123
coad.gse14333	null
coad.tcga	chr2q35	WNT10A	DNAJB2	DES	CHPF	SPEG	CYP27A1	GMPPA	ZFAND2B	OBSL1	RNF25	STK16	FAM134A	CNPPD1	WNT6	0.363063
ov.gse9891	null
ov.tcga	null
Top genes:	OBSL1:3	CHPF:3	DNAJB2:3	DES:3	GMPPA:3	SPEG:2	WNT6:2	ATG9A:2	ANKZF1:2	CNPPD1:2
182	chr2p25.1	3	0.28398
brca.gse2034	chr2p25.1-p24.2	PDIA6	YWHAQ	KLF11	ODC1	RRM2	SMC6	DDX1	FAM49A	LPIN1	ADAM17	E2F6	TRIB2	TAF1B	HPCAL1	0.407552
brca.tcga	null
coad.gse14333	chr2p25.3-p25.1	CPSF3	PDIA6	YWHAQ	NOL10	RNASEH1	ODC1	RRM2	E2F6	RPS7	ITGB1BP1	LOC100506054	TAF1B	ADI1	IAH1	0.499649
coad.tcga	chr2p25.3-p25.1	ITGB1BP1	YWHAQ	IAH1	E2F6	TAF1B	PQLC3	RSAD2	CPSF3	ID2	FLJ33534	RNASEH1	RPS7	ODC1	ALLC	0.28398
ov.gse9891	null
ov.tcga	null
Top genes:	YWHAQ:3	ODC1:3	E2F6:3	TAF1B:3	PDIA6:2	RRM2:2	CPSF3:2	RNASEH1:2	RPS7:2	ITGB1BP1:2
183	chr1q21.1	3	0.283525
brca.gse2034	chr1q21.1-q21.2	PEX11B	RBM8A	ACP6	PIAS3	POLR3C	BCL9	FMO5	RNF115	PDE4DIP	CHD1L	SEC22B	ITGA10	TXNIP	PRKAB2	0.283525
brca.tcga	null
coad.gse14333	chr1q21.1-q21.2	PEX11B	RBM8A	POLR3C	POLR3GL	RNF115	FMO5	TXNIP	PRKAB2	PIAS3	PDE4DIP	CHD1L	ACP6	BCL9	NUDT17	0.37673
coad.tcga	null
ov.gse9891	null
ov.tcga	chr1q21.1-q21.2	POLR3C	PEX11B	RNF115	PIAS3	RBM8A	CHD1L	PRKAB2	BCL9	ACP6	FMO5	ITGA10	PDZK1	GJA5	PPIAL4A	0.397571
Top genes:	PEX11B:3	RBM8A:3	ACP6:3	PIAS3:3	POLR3C:3	BCL9:3	FMO5:3	RNF115:3	CHD1L:3	PRKAB2:3
184	chr19p12	2	0.692086
brca.gse2034	null
brca.tcga	chr19p13.11-p12	ZNF43	ZNF681	ZNF675	ZNF85	ZNF826P	ZNF99	ZNF208	ZNF676	ZNF430	ZNF253	ZNF429	ZNF254	ZNF708	ZNF431	0.852642
coad.gse14333	null
coad.tcga	chr19p12	ZNF675	ZNF85	ZNF43	ZNF430	ZNF99	ZNF681	ZNF708	ZNF826P	ZNF431	ZNF254	ZNF100	ZNF429	ZNF492	ZNF208	0.692086
ov.gse9891	null
ov.tcga	null
Top genes:	ZNF43:2	ZNF681:2	ZNF675:2	ZNF85:2	ZNF826P:2	ZNF99:2	ZNF208:2	ZNF430:2	ZNF429:2	ZNF254:2
185	chr20q11.21	2	0.614548
brca.gse2034	null
brca.tcga	null
coad.gse14333	chr20q11.21-q11.22	PLAGL2	TM9SF4	RALY	ASXL1	KIF3B	POFUT1	EIF2S2	COMMD7	CDK5RAP1	PDRG1	PXMP4	CHMP4B	C20orf112	AHCY	0.674363
coad.tcga	chr20q11.21-q11.22	POFUT1	PLAGL2	ASXL1	GGT7	DYNLRB1	PIGU	NCOA6	KIF3B	EIF2S2	CBFA2T2	MAPRE1	CHMP4B	ITCH	GSS	0.614548
ov.gse9891	null
ov.tcga	null
Top genes:	PLAGL2:2	ASXL1:2	KIF3B:2	POFUT1:2	EIF2S2:2	CHMP4B:2	TM9SF4:1	RALY:1	COMMD7:1	CDK5RAP1:1
186	chr8q22.1	2	0.588305
brca.gse2034	chr8q22.1-q22.3	MTDH	AZIN1	ZNF706	POLR2K	MTERFD1	HRSP12	UBR5	UQCRB	STK3	PTDSS1	RPL30	ANKRD46	LAPTM4B	YWHAZ	0.65415
brca.tcga	null
coad.gse14333	chr8q21.3-q22.2	SDC2	TSPYL5	RUNX1T1	CPQ	GEM	TP53INP1	MATN2	C8orf47	TMEM67	PLEKHF2	C8orf37	LAPTM4B	RPL30	FAM92A1	0.588305
coad.tcga	null
ov.gse9891	null
ov.tcga	null
Top genes:	RPL30:2	LAPTM4B:2	MTDH:1	AZIN1:1	ZNF706:1	POLR2K:1	MTERFD1:1	HRSP12:1	UBR5:1	UQCRB:1
187	chr8p12	2	0.581984
brca.gse2034	null
brca.tcga	null
coad.gse14333	null
coad.tcga	chr8p21.1-p12	GTF2E2	LEPROTL1	PPP2CB	INTS9	DCTN6	TMEM66	WRN	UBXN8	FUT10	GSR	TTI2	ELP3	MAK16	FBXO16	0.594344
ov.gse9891	null
ov.tcga	chr8p21.2-p12	LEPROTL1	GTF2E2	INTS9	DCTN6	PPP2R2A	TMEM66	PPP2CB	CCDC25	KCTD9	UBXN8	FZD3	ZNF395	EPHX2	HMBOX1	0.581984
Top genes:	GTF2E2:2	LEPROTL1:2	PPP2CB:2	INTS9:2	DCTN6:2	TMEM66:2	UBXN8:2	WRN:1	FUT10:1	GSR:1
188	chr17q21.33	2	0.579016
brca.gse2034	null
brca.tcga	null
coad.gse14333	chr17q21.33	UTP18	NME1	PHB	LRRC59	SLC35B1	MRPL27	EME1	ANKRD40	SPOP	XYLT2	LUC7L3	EPN3	SPAG9	RSAD1	0.579016
coad.tcga	null
ov.gse9891	null
ov.tcga	chr17q21.32-q21.33	SLC35B1	SPOP	SNF8	PHB	KAT7	UBE2Z	LRRC59	CALCOCO2	ATP5G1	RSAD1	FAM117A	PDK2	XYLT2	ACSF2	0.579649
Top genes:	PHB:2	LRRC59:2	SLC35B1:2	SPOP:2	XYLT2:2	RSAD1:2	UTP18:1	NME1:1	MRPL27:1	EME1:1
189	chr8q24.13	2	0.573014
brca.gse2034	null
brca.tcga	null
coad.gse14333	null
coad.tcga	null
ov.gse9891	chr8q24.13-q24.22	RNF139	NSMCE2	TATDN1	NDUFB9	KIAA0196	TRMT12	PHF20L1	EFR3A	FAM49B	FAM84B	SQLE	ZNF572	NDRG1	ASAP1	0.630084
ov.tcga	chr8q24.11-q24.13	DERL1	MRPL13	KIAA0196	ATAD2	WDYHV1	TRMT12	RNF139	RAD21	SQLE	TAF2	WDR67	DSCC1	SNTB1	EXT1	0.573014
Top genes:	RNF139:2	KIAA0196:2	TRMT12:2	SQLE:2	NSMCE2:1	TATDN1:1	NDUFB9:1	PHF20L1:1	EFR3A:1	FAM49B:1
190	chr11q22.3	2	0.570449
brca.gse2034	null
brca.tcga	chr11q22.2-q22.3	CASP1	CARD16	CARD17	CASP5	CASP4	FDX1	ZC3H12C	MMP3	ATM	RDX	DCUN1D5	MMP1	MMP12	CARD18	0.606345
coad.gse14333	null
coad.tcga	null
ov.gse9891	null
ov.tcga	chr11q22.3	FDX1	NPAT	AASDHPPT	DDX10	CUL5	RDX	ACAT1	ATM	SLC35F2	EXPH5	CASP4	DYNC2H1	CASP1	PDGFD	0.570449
Top genes:	CASP1:2	CASP4:2	FDX1:2	ATM:2	RDX:2	CARD16:1	CARD17:1	CASP5:1	ZC3H12C:1	MMP3:1
191	chr8q22.3	2	0.567882
brca.gse2034	null
brca.tcga	null
coad.gse14333	chr8q22.3-q24.11	SLC25A32	AZIN1	EBAG9	EMC2	UTP23	DCAF13	MED30	ATP6V1C1	RAD21	NUDCD1	EIF3H	EIF3E	UBR5	OXR1	0.651715
coad.tcga	null
ov.gse9891	null
ov.tcga	chr8q22.2-q23.1	ATP6V1C1	SLC25A32	EMC2	YWHAZ	UBR5	AZIN1	FZD6	STK3	POLR2K	OXR1	COX6C	VPS13B	ZNF706	ENY2	0.567882
Top genes:	SLC25A32:2	AZIN1:2	EMC2:2	ATP6V1C1:2	UBR5:2	OXR1:2	EBAG9:1	UTP23:1	DCAF13:1	MED30:1
192	chr8q11.23	2	0.564282
brca.gse2034	chr8q11.21-q12.2	MRPL15	UBE2V2	RB1CC1	TGS1	TCEA1	ATP6V1H	LYPLA1	UBXN2B	RAB2A	NSMAF	CHCHD7	CHD7	IMPAD1	MCM4	0.564282
brca.tcga	null
coad.gse14333	null
coad.tcga	chr8p11.21-q12.1	MRPL15	TMEM68	UBE2V2	LYPLA1	TCEA1	TGS1	CHCHD7	KIAA0146	ATP6V1H	VDAC3	RB1CC1	FNTA	RNF170	PRKDC	0.572017
ov.gse9891	null
ov.tcga	null
Top genes:	MRPL15:2	UBE2V2:2	RB1CC1:2	TGS1:2	TCEA1:2	ATP6V1H:2	LYPLA1:2	CHCHD7:2	UBXN2B:1	RAB2A:1
193	chr12p13.33	2	0.562104
brca.gse2034	chr12p13.33-p13.31	FOXM1	NDUFA9	RAD51AP1	TEAD4	NCAPD2	NOP2	TULP3	C12orf4	DYRK4	LTBR	ZNF384	PLEKHG6	C12orf5	ING4	0.562104
brca.tcga	null
coad.gse14333	null
coad.tcga	null
ov.gse9891	null
ov.tcga	chr12p13.33-p13.32	WNK1	ADIPOR2	KDM5A	TULP3	ERC1	FKBP4	FOXM1	TEAD4	ITFG2	C12orf5	TSPAN9	RAD52	NINJ2	IQSEC3	0.580766
Top genes:	FOXM1:2	TEAD4:2	TULP3:2	C12orf5:2	NDUFA9:1	RAD51AP1:1	NCAPD2:1	NOP2:1	C12orf4:1	DYRK4:1
194	chr1p36.32	2	0.561513
brca.gse2034	null
brca.tcga	null
coad.gse14333	chr1p36.32-p36.23	LRRC47	WRAP73	C1orf174	DFFB	NOL9	DNAJC11	ICMT	ACOT7	CEP104	ARHGEF16	TPRG1L	RPL22	CAMTA1	KLHL21	0.561513
coad.tcga	null
ov.gse9891	null
ov.tcga	chr1p36.33-p36.32	LRRC47	NADK	CDK11A	CEP104	WRAP73	GNB1	PANK4	RER1	TP73-AS1	DFFB	PEX10	ATAD3A	ARHGEF16	MMP23B	0.582195
Top genes:	LRRC47:2	WRAP73:2	DFFB:2	CEP104:2	ARHGEF16:2	C1orf174:1	NOL9:1	DNAJC11:1	ICMT:1	ACOT7:1
195	chr1q42.12	2	0.542709
brca.gse2034	null
brca.tcga	null
coad.gse14333	null
coad.tcga	null
ov.gse9891	chr1q41-q42.13	PARP1	C1orf55	FBXO28	NVL	SRP9	CNIH4	TAF1A	DNAH14	LIN9	SNAP47	TP53BP2	WDR26	LBR	AIDA	0.542709
ov.tcga	chr1q41-q42.12	PARP1	FBXO28	TAF1A	RAB3GAP2	NVL	TP53BP2	AIDA	MIA3	WDR26	LBR	MARC1	H3F3A	ENAH	SRP9	0.559355
Top genes:	PARP1:2	FBXO28:2	NVL:2	SRP9:2	TAF1A:2	TP53BP2:2	WDR26:2	LBR:2	AIDA:2	C1orf55:1
196	chr8q13.1	2	0.540316
brca.gse2034	null
brca.tcga	null
coad.gse14333	chr8q12.1-q13.2	ARMC1	MTFR1	CSPP1	ARFGEF1	COPS5	RRS1	YTHDF3	VCPIP1	NSMAF	PDE7A	RAB2A	ASPH	CHD7	SNHG6	0.610463
coad.tcga	chr8q13.1-q21.11	COPS5	TMEM70	PEX2	TCEB1	TRAM1	UBE2W	LACTB2	ARFGEF1	TERF1	STAU2	MCMDC2	CSPP1	GDAP1	RDH10	0.540316
ov.gse9891	null
ov.tcga	null
Top genes:	CSPP1:2	ARFGEF1:2	COPS5:2	ARMC1:1	MTFR1:1	RRS1:1	YTHDF3:1	VCPIP1:1	NSMAF:1	PDE7A:1
197	chr13q12.11	2	0.539498
brca.gse2034	null
brca.tcga	null
coad.gse14333	chr13q12.11-q12.2	MRP63	SAP18	XPO4	SPATA13	EFHA1	MIPEP	MTIF3	PARP4	MTMR6	N6AMT2	RNF6	IFT88	CENPJ	CRYL1	0.666352
coad.tcga	null
ov.gse9891	chr13q12.11-q12.12	MPHOSPH8	EFHA1	ZMYM5	SAP18	MRP63	PSPC1	N6AMT2	ZMYM2	XPO4	IFT88	ZDHHC20	LATS2	SACS	CRYL1	0.539498
ov.tcga	null
Top genes:	MRP63:2	SAP18:2	XPO4:2	EFHA1:2	N6AMT2:2	IFT88:2	CRYL1:2	SPATA13:1	MIPEP:1	MTIF3:1
198	chr3p25.3	2	0.533771
brca.gse2034	null
brca.tcga	chr3p25.3-p25.2	MTMR14	SEC13	RPUSD3	THUMPD3	BRPF1	ARPC4	RAF1	BRK1	JAGN1	MKRN2	TATDN2	OGG1	SETD5	IL17RC	0.535548
coad.gse14333	null
coad.tcga	null
ov.gse9891	chr3p26.1-p25.3	BRK1	EMC3	THUMPD3	JAGN1	SEC13	RAD18	ARL8B	MTMR14	BRPF1	TADA3	RPUSD3	TATDN2	FANCD2	SETD5	0.533771
ov.tcga	null
Top genes:	MTMR14:2	SEC13:2	RPUSD3:2	THUMPD3:2	BRPF1:2	BRK1:2	JAGN1:2	TATDN2:2	SETD5:2	ARPC4:1
199	chr1p21.2	2	0.532352
brca.gse2034	null
brca.tcga	null
coad.gse14333	chr1p21.3-p13.3	RTCA	AGL	SLC35A3	SLC30A7	DBT	HIAT1	CCDC76	RWDD3	SNX7	PRMT6	SASS6	RNPC3	TMEM56	DPH5	0.536775
coad.tcga	null
ov.gse9891	null
ov.tcga	chr1p22.1-p21.2	SLC35A3	TMED5	GCLM	DR1	ABCD3	RTCA	AGL	DNTTIP2	RWDD3	DBT	SNX7	CCDC76	BCAR3	MTF2	0.532352
Top genes:	RTCA:2	AGL:2	SLC35A3:2	DBT:2	CCDC76:2	RWDD3:2	SNX7:2	SLC30A7:1	HIAT1:1	PRMT6:1
200	chr20q13.12	2	0.530316
brca.gse2034	chr20q13.12	RBPJL	HNF4A	TP53TG5	GDAP1L1	JPH2	KCNS1	LOC79015	MATN4	SPINT3	SEMG1	TTPAL	SEMG2	SPINLW1	STK4	0.55035
brca.tcga	null
coad.gse14333	null
coad.tcga	null
ov.gse9891	chr20q13.12	DNTTIP1	ELMO2	SLC35C2	TP53RK	ACOT8	PIGT	NCOA5	SYS1	ZSWIM3	CTSA	PCIF1	ZSWIM1	ZNF335	WFDC2	0.530316
ov.tcga	null
Top genes:	RBPJL:1	HNF4A:1	TP53TG5:1	GDAP1L1:1	JPH2:1	KCNS1:1	LOC79015:1	MATN4:1	SPINT3:1	SEMG1:1
201	chr1q43	2	0.528902
brca.gse2034	chr1q42.2-q43	HEATR1	GGPS1	TBCE	ARID4B	TOMM20	RBM34	MTR	LGALS8	FH	TARBP1	GPR137B	OPN3	KCNK1	LYST	0.536738
brca.tcga	null
coad.gse14333	null
coad.tcga	null
ov.gse9891	chr1q42.2-q43	HEATR1	TBCE	ARID4B	MTR	RBM34	TSNAX	TOMM20	NTPCR	GGPS1	B3GALNT2	C1orf31	TARBP1	FH	IRF2BP2	0.528902
ov.tcga	null
Top genes:	HEATR1:2	GGPS1:2	TBCE:2	ARID4B:2	TOMM20:2	RBM34:2	MTR:2	FH:2	TARBP1:2	LGALS8:1
202	chr14q22.1	2	0.528783
brca.gse2034	chr14q22.1-q23.1	PSMC6	GMFB	ACTR10	CNIH	C14orf166	CGRRF1	PSMA3	TIMM9	KTN1	ATG14	FBXO34	ARID4A	DAAM1	MAPK1IP1L	0.528783
brca.tcga	null
coad.gse14333	chr14q21.3-q22.3	TMX1	CNIH	PSMC6	EXOC5	GMFB	MAP4K5	MAPK1IP1L	SOCS4	C14orf166	STYX	ERO1L	WDHD1	GCH1	GNPNAT1	0.606298
coad.tcga	null
ov.gse9891	null
ov.tcga	null
Top genes:	PSMC6:2	GMFB:2	CNIH:2	C14orf166:2	MAPK1IP1L:2	ACTR10:1	CGRRF1:1	PSMA3:1	TIMM9:1	KTN1:1
203	chr4q12	2	0.522798
brca.gse2034	null
brca.tcga	null
coad.gse14333	chr4p12-q12	SRP72	PAICS	PPAT	NFXL1	FIP1L1	DCUN1D4	USP46	TMEM165	OCIAD2	DANCR	EXOC1	SLAIN2	OCIAD1	AASDH	0.585259
coad.tcga	null
ov.gse9891	null
ov.tcga	chr4q12-q13.2	PAICS	SRP72	PPAT	EXOC1	POLR2B	CEP135	CENPC1	UBA6	YTHDC1	REST	IGFBP7	HOPX	LPHN3	UGT2B17	0.522798
Top genes:	SRP72:2	PAICS:2	PPAT:2	EXOC1:2	NFXL1:1	FIP1L1:1	DCUN1D4:1	USP46:1	TMEM165:1	OCIAD2:1
204	chr1p36.22	2	0.522335
brca.gse2034	null
brca.tcga	null
coad.gse14333	null
coad.tcga	null
ov.gse9891	chr1p36.22	EXOSC10	MTOR	APITD1	KIAA2013	MFN2	PGD	MAD2L2	PEX14	UBE4B	LZIC	AGTRAP	DFFA	MIIP	UBIAD1	0.526544
ov.tcga	chr1p36.22	EXOSC10	PEX14	MTOR	MFN2	UBE4B	KIF1B	DFFA	TARDBP	PGD	APITD1	CLCN6	SRM	UBIAD1	PLOD1	0.522335
Top genes:	EXOSC10:2	MTOR:2	APITD1:2	MFN2:2	PGD:2	PEX14:2	UBE4B:2	DFFA:2	UBIAD1:2	KIAA2013:1
205	chr9q34.13	2	0.517462
brca.gse2034	null
brca.tcga	null
coad.gse14333	null
coad.tcga	null
ov.gse9891	chr9q34.11-q34.13	NUP214	TOR1A	GPR107	USP20	TTF1	POMT1	C9orf78	PRRC2B	ASB6	MED27	UCK1	TOR1B	TSC1	ABL1	0.517462
ov.tcga	chr9q34.12-q34.2	TTF1	SETX	PRRC2B	REXO4	FUBP3	EXOSC2	MED22	RALGDS	DDX31	TSC1	ABL1	GTF3C4	GTF3C5	NUP214	0.517958
Top genes:	NUP214:2	TTF1:2	PRRC2B:2	TSC1:2	ABL1:2	TOR1A:1	GPR107:1	USP20:1	POMT1:1	C9orf78:1
206	chr19p13.2	2	0.514312
brca.gse2034	null
brca.tcga	chr19p13.2	STXBP2	XAB2	CAMSAP3	ZNF414	RAB11B	EVI5L	PNPLA6	ZNF358	MCOLN1	LRRC8E	TIMM44	CERS4	SNAPC2	MAP2K7	0.514312
coad.gse14333	null
coad.tcga	null
ov.gse9891	chr19p13.2	TRAPPC5	NDUFA7	C19orf79	TIMM44	ELAVL1	PNPLA6	MAP2K7	CAMSAP3	ZNF358	ARHGEF18	XAB2	STXBP2	CTXN1	CD320	0.593482
ov.tcga	null
Top genes:	STXBP2:2	XAB2:2	CAMSAP3:2	PNPLA6:2	ZNF358:2	TIMM44:2	MAP2K7:2	ZNF414:1	RAB11B:1	EVI5L:1
207	chr14q21.3	2	0.51255
brca.gse2034	null
brca.tcga	null
coad.gse14333	null
coad.tcga	chr14q21.3-q22.2	DNAAF2	GMFB	PSMC6	CNIH	LRR1	STYX	POLE2	RPS29	CGRRF1	WDHD1	TMX1	CDKN3	ATP5S	C14orf166	0.594148
ov.gse9891	chr14q13.2-q21.3	NEMF	GEMIN2	FBXO33	FKBP3	PNN	FANCM	TRAPPC6B	KLHDC2	BRMS1L	RALGAPA1	RPS29	KLHL28	PRPF39	MBIP	0.51255
ov.tcga	null
Top genes:	RPS29:2	DNAAF2:1	GMFB:1	PSMC6:1	CNIH:1	LRR1:1	STYX:1	POLE2:1	CGRRF1:1	WDHD1:1
208	chr13q14.3	2	0.512409
brca.gse2034	chr13q14.2-q14.3	UTP14C	RCBTB1	SUCLA2	MED4	TRIM13	INTS6	ESD	RB1	PHF11	ITM2B	LPAR6	NEK3	RCBTB2	ATP7B	0.512409
brca.tcga	null
coad.gse14333	null
coad.tcga	chr13q14.2-q14.3	INTS6	MED4	UTP14C	TRIM13	SPRYD7	SETDB2	SUCLA2	RCBTB1	PHF11	CDADC1	EBPL	KPNA3	RNASEH2B	RB1	0.58153
ov.gse9891	null
ov.tcga	null
Top genes:	UTP14C:2	RCBTB1:2	SUCLA2:2	MED4:2	TRIM13:2	INTS6:2	RB1:2	PHF11:2	ESD:1	ITM2B:1
209	chr14q23.3	2	0.508768
brca.gse2034	null
brca.tcga	null
coad.gse14333	null
coad.tcga	chr14q23.1-q23.3	EIF2S1	FUT8	PPM1A	PPP2R5E	ZBTB25	FNTB	MTHFD1	ATP6V1D	SGPP1	WDR89	MPP5	HIF1A	SNAPC1	MAX	0.508768
ov.gse9891	null
ov.tcga	chr14q23.2-q24.1	ATP6V1D	EIF2S1	PPP2R5E	VTI1B	RDH11	MPP5	MAX	FNTB	ZFYVE26	ZBTB1	PIGH	SNAPC1	GPHN	MTHFD1	0.544433
Top genes:	EIF2S1:2	PPP2R5E:2	FNTB:2	MTHFD1:2	ATP6V1D:2	MPP5:2	SNAPC1:2	MAX:2	FUT8:1	PPM1A:1
210	chrXq22.2	2	0.506675
brca.gse2034	null
brca.tcga	null
coad.gse14333	chrXq22.1-q22.3	PLP1	GPRASP1	TCEAL2	TCEAL7	RAB9B	BEX1	BEX4	ZMAT1	TCEAL4	NRK	ZCCHC18	LOC286437	TCEAL1	BHLHB9	0.567956
coad.tcga	null
ov.gse9891	chrXq22.1-q22.2	NGFRAP1	BEX4	WBP5	BEX2	TCEAL8	TCEAL4	FAM199X	ARMCX5	BHLHB9	H2BFXP	TCEAL1	LOC100287765	TMSB15B	ARMCX5-GPRASP2	0.506675
ov.tcga	null
Top genes:	BEX4:2	TCEAL4:2	TCEAL1:2	BHLHB9:2	PLP1:1	GPRASP1:1	TCEAL2:1	TCEAL7:1	RAB9B:1	BEX1:1
211	chr3q29	2	0.504436
brca.gse2034	null
brca.tcga	chr3q29	SENP5	WDR53	NCBP2	RNF168	OPA1	LOC152217	LSG1	PCYT1A	ATP13A3	PAK2	DLG1	UBXN7	XXYLT1	TFRC	0.504436
coad.gse14333	null
coad.tcga	null
ov.gse9891	chr3q29	LSG1	LOC152217	FBXO45	NCBP2	WDR53	RNF168	SENP5	PAK2	ACAP2	OPA1	UBXN7	PIGX	ATP13A3	PPP1R2	0.655479
ov.tcga	null
Top genes:	SENP5:2	WDR53:2	NCBP2:2	RNF168:2	OPA1:2	LOC152217:2	LSG1:2	ATP13A3:2	PAK2:2	UBXN7:2
212	chr11q23.1	2	0.502524
brca.gse2034	null
brca.tcga	null
coad.gse14333	chr11q22.3-q23.2	DLAT	ALG9	ZW10	USP28	SDHD	C11orf57	FDX1	TTC12	SIK2	DDX10	PPP2R1B	EXPH5	PTS	TIMM8B	0.502524
coad.tcga	null
ov.gse9891	chr11q22.3-q23.2	DLAT	C11orf57	TIMM8B	ZW10	DDX10	PTS	ALG9	SDHD	RDX	USP28	SIK2	FDX1	FDXACB1	PPP2R1B	0.580316
ov.tcga	null
Top genes:	DLAT:2	ALG9:2	ZW10:2	USP28:2	SDHD:2	C11orf57:2	FDX1:2	SIK2:2	DDX10:2	PPP2R1B:2
213	chr5p15.31	2	0.498215
brca.gse2034	null
brca.tcga	null
coad.gse14333	null
coad.tcga	chr5p15.33-p15.31	NSUN2	SLC12A7	EXOC3	BRD9	CLPTM1L	SDHA	KIAA0947	MED10	NDUFS6	CEP72	PDCD6	LPCAT1	SLC9A3	TRIP13	0.498215
ov.gse9891	null
ov.tcga	chr5p15.33-p15.2	FASTKD3	TRIP13	CCT5	NDUFS6	KIAA0947	MTRR	PAPD7	SRD5A1	BRD9	LPCAT1	SLC12A7	SEMA5A	TAS2R1	ADCY2	0.556377
Top genes:	SLC12A7:2	BRD9:2	KIAA0947:2	NDUFS6:2	LPCAT1:2	TRIP13:2	NSUN2:1	EXOC3:1	CLPTM1L:1	SDHA:1
214	chr11q13.2	2	0.498093
brca.gse2034	null
brca.tcga	chr11q13.2	PPP1CA	CDK2AP2	CORO1B	AIP	RAD9A	NDUFV1	ANKRD13D	TMEM134	UNC93B1	NDUFS8	ADRBK1	KDM2A	POLD4	TCIRG1	0.52942
coad.gse14333	chr11q13.2-q13.3	PPP1CA	NDUFV1	PPP6R3	NDUFS8	PPFIA1	PITPNM1	CDK2AP2	C11orf24	RPS6KB2	FADD	ORAOV1	UNC93B1	CHKA	IGHMBP2	0.498093
coad.tcga	null
ov.gse9891	null
ov.tcga	null
Top genes:	PPP1CA:2	CDK2AP2:2	NDUFV1:2	UNC93B1:2	NDUFS8:2	CORO1B:1	AIP:1	RAD9A:1	ANKRD13D:1	TMEM134:1
215	chr22q13.1	2	0.496432
brca.gse2034	null
brca.tcga	chr22q13.1-q13.2	APOBEC3G	APOBEC3F	APOBEC3C	APOBEC3H	GRAP2	APOBEC3A	APOBEC3B	APOBEC3D	ENTHD1	MGAT3	ADSL	PHF5A	MKL1	ATF4	0.496432
coad.gse14333	null
coad.tcga	null
ov.gse9891	null
ov.tcga	chr22q13.1	TMEM184B	TRIOBP	GGA1	JOSD1	SUN2	MICALL1	CBY1	DNAL4	CSNK1E	CBX6	GTPBP1	POLR2F	CBX7	NOL12	0.51832
Top genes:	APOBEC3G:1	APOBEC3F:1	APOBEC3C:1	APOBEC3H:1	GRAP2:1	APOBEC3A:1	APOBEC3B:1	APOBEC3D:1	ENTHD1:1	MGAT3:1
216	chr19p13.2	2	0.494294
brca.gse2034	null
brca.tcga	chr19p13.2	ZNF442	ZNF799	ZNF625	ZNF700	ZNF823	ZNF709	ZNF443	ZNF20	ZNF441	ZNF433	ZNF763	ZNF44	ZNF627	ZNF136	0.666608
coad.gse14333	null
coad.tcga	chr19p13.2	ZNF799	ZNF443	ZNF442	ZNF709	ZNF564	ZNF823	ZNF791	ZNF625	ZNF700	ZNF763	ZNF440	ZNF441	ZNF44	ZNF433	0.494294
ov.gse9891	null
ov.tcga	null
Top genes:	ZNF442:2	ZNF799:2	ZNF625:2	ZNF700:2	ZNF823:2	ZNF709:2	ZNF443:2	ZNF441:2	ZNF433:2	ZNF763:2
217	chr12q13.3	2	0.490533
brca.gse2034	null
brca.tcga	null
coad.gse14333	chr12q13.2-q13.3	PTGES3	TMEM194A	PA2G4	PRIM1	CDK2	TIMELESS	DNAJC14	RNF41	ATP5B	CS	CNPY2	GLS2	OBFC2B	BAZ2A	0.539496
coad.tcga	null
ov.gse9891	chr12q13.2-q13.3	DCTN2	ZBTB39	SMARCC2	MYL6B	RNF41	CNPY2	ANKRD52	OBFC2B	CS	NAB2	TIMELESS	PAN2	MARS	PTGES3	0.490533
ov.tcga	null
Top genes:	PTGES3:2	TIMELESS:2	RNF41:2	CS:2	CNPY2:2	OBFC2B:2	TMEM194A:1	PA2G4:1	PRIM1:1	CDK2:1
218	chr2q37.3	2	0.49021
brca.gse2034	null
brca.tcga	null
coad.gse14333	null
coad.tcga	null
ov.gse9891	chr2q37.3	STK25	ATG4B	HDLBP	THAP4	MTERFD2	PPP1R7	ING5	DTYMK	SEPT2	FARP2	PASK	CAPN10	D2HGDH	RNPEPL1	0.493016
ov.tcga	chr2q37.3	STK25	NDUFA10	SEPT2	ILKAP	PPP1R7	THAP4	HDLBP	HDAC4	FARP2	PASK	MTERFD2	PER2	ASB1	GPC1	0.49021
Top genes:	STK25:2	HDLBP:2	THAP4:2	MTERFD2:2	PPP1R7:2	SEPT2:2	FARP2:2	PASK:2	ATG4B:1	ING5:1
219	chr6p22.1	2	0.485202
brca.gse2034	chr6p22.1	HIST1H3J	OR2H1	OR12D3	GPX5	OR10C1	OR2J2	ZNF192	OR2B2	OR2W1	OR2H2	OR2J3	OR12D2	OR2B6	ZKSCAN3	0.485202
brca.tcga	null
coad.gse14333	null
coad.tcga	null
ov.gse9891	chr6p22.1	ZKSCAN4	ZNF187	PGBD1	ZKSCAN3	ZNF184	ZSCAN16	ZSCAN12	ZNF193	ZNF311	SCAND3	TRIM27	ZNF165	ZNF192	ZNF204P	0.57448
ov.tcga	null
Top genes:	ZNF192:2	ZKSCAN3:2	HIST1H3J:1	OR2H1:1	OR12D3:1	GPX5:1	OR10C1:1	OR2J2:1	OR2B2:1	OR2W1:1
220	chr18q23	2	0.481161
brca.gse2034	null
brca.tcga	null
coad.gse14333	chr18q22.2-q23	TXNL4A	TIMM21	SOCS6	RBFA	ZADH2	HSBP1L1	ADNP2	LOC400657	CYB5A	CNDP2	RTTN	CTDP1	PQLC1	ATP9B	0.500629
coad.tcga	chr18q22.1-q23	ADNP2	TIMM21	ZADH2	TXNL4A	ATP9B	RBFA	TMX3	CTDP1	SOCS6	CNDP2	ZNF236	PQLC1	ZNF407	LOC400657	0.481161
ov.gse9891	null
ov.tcga	null
Top genes:	TXNL4A:2	TIMM21:2	SOCS6:2	RBFA:2	ZADH2:2	ADNP2:2	LOC400657:2	CNDP2:2	CTDP1:2	PQLC1:2
221	chr14q23.1	2	0.480292
brca.gse2034	null
brca.tcga	chr14q22.2-q23.1	JKAMP	CGRRF1	ACTR10	AP5M1	DHRS7	PPM1A	GMFB	ARID4A	CNIH	NAA30	SOCS4	ATG14	EXOC5	PSMA3	0.480292
coad.gse14333	null
coad.tcga	null
ov.gse9891	chr14q22.3-q23.3	PPM1A	NAA30	ACTR10	MNAT1	ARID4A	JKAMP	FLJ31306	C14orf135	SNAPC1	TRMT5	TIMM9	ZBTB1	PPP2R5E	DAAM1	0.582198
ov.tcga	null
Top genes:	JKAMP:2	ACTR10:2	PPM1A:2	ARID4A:2	NAA30:2	CGRRF1:1	AP5M1:1	DHRS7:1	GMFB:1	CNIH:1
222	chr10q23.33	2	0.479777
brca.gse2034	null
brca.tcga	null
coad.gse14333	chr10q23.31-q23.33	KIF11	KIF20B	NOC3L	CEP55	HELLS	IDE	EXOC6	TBC1D12	MARCH5	BTAF1	PCGF5	RPP30	PANK1	TNKS2	0.554036
coad.tcga	null
ov.gse9891	null
ov.tcga	chr10q23.32-q24.1	NOC3L	TCTN3	ALDH18A1	BTAF1	MARCH5	TNKS2	IDE	KIF11	TBC1D12	TM9SF3	CEP55	CCNJ	HHEX	PDLIM1	0.479777
Top genes:	KIF11:2	NOC3L:2	CEP55:2	IDE:2	TBC1D12:2	MARCH5:2	BTAF1:2	TNKS2:2	KIF20B:1	HELLS:1
223	chr19q13.12	2	0.477103
brca.gse2034	null
brca.tcga	chr19q13.12-q13.2	ZNF571	ZNF461	ZNF790	ZNF567	ZNF529	ZNF585A	ZNF568	ZNF527	ZNF570	ZNF383	ZNF420	ZNF573	ZNF569	EIF3K	0.477103
coad.gse14333	null
coad.tcga	null
ov.gse9891	chr19q13.12	ZNF420	HKR1	ZNF607	ZNF571	ZNF585A	ZNF569	ZNF383	ZFP30	ZNF829	ZNF585B	ZNF573	ZNF570	ZNF568	ZNF345	0.66067
ov.tcga	null
Top genes:	ZNF571:2	ZNF585A:2	ZNF568:2	ZNF570:2	ZNF383:2	ZNF420:2	ZNF573:2	ZNF569:2	ZNF461:1	ZNF790:1
224	chr5q14.3	2	0.473557
brca.gse2034	chr5q14.2-q15	CETN3	TTC37	COX7C	CCNH	RIOK2	RASA1	FAM172A	XRCC4	CAST	ERAP1	GLRX	VCAN	MEF2C	RHOBTB3	0.473557
brca.tcga	null
coad.gse14333	null
coad.tcga	null
ov.gse9891	chr5q14.1-q15	RASA1	ZFYVE16	ZCCHC9	CETN3	CCNH	LOC100131067	COX7C	TMEM161B	MBLAC2	LYSMD3	MSH3	FAM172A	ATG10	SSBP2	0.525514
ov.tcga	null
Top genes:	CETN3:2	COX7C:2	CCNH:2	RASA1:2	FAM172A:2	TTC37:1	RIOK2:1	XRCC4:1	CAST:1	ERAP1:1
225	chr3p25.2	2	0.47319
brca.gse2034	null
brca.tcga	null
coad.gse14333	chr3p25.3-p25.1	RAF1	EAF1	MKRN2	LSM3	DPH3	CHCHD4	CAPN7	ANKRD28	TAMM41	HACL1	ZFYVE20	NR2C2	ATG7	RPL32	0.47319
coad.tcga	null
ov.gse9891	null
ov.tcga	chr3p25.3-p25.1	MKRN2	RAF1	XPC	TATDN2	TSEN2	TMEM43	VGLL4	IQSEC1	ATG7	NR2C2	SEC13	LSM3	CAND2	NUP210	0.483622
Top genes:	RAF1:2	MKRN2:2	LSM3:2	NR2C2:2	ATG7:2	EAF1:1	DPH3:1	CHCHD4:1	CAPN7:1	ANKRD28:1
226	chr1q24.3	2	0.469487
brca.gse2034	null
brca.tcga	chr1q24.2-q25.1	FASLG	XCL2	SELL	SELP	XCL1	SELE	FMO1	FMO2	DPT	FMO3	F5	PRRX1	TNFSF4	MYOC	0.469487
coad.gse14333	null
coad.tcga	null
ov.gse9891	null
ov.tcga	chr1q24.2-q24.3	PIGC	METTL13	BRP44	NME7	SCYL3	METTL18	KIFAP3	VAMP4	BLZF1	C1orf112	TIPRL	DCAF6	SFT2D2	FMO4	0.508534
Top genes:	FASLG:1	XCL2:1	SELL:1	SELP:1	XCL1:1	SELE:1	FMO1:1	FMO2:1	DPT:1	FMO3:1
227	chr19q13.41	2	0.465476
brca.gse2034	null
brca.tcga	chr19q13.41-q13.42	ZNF578	ZNF761	ZNF813	ZNF137P	ZNF816	ZNF665	ZNF468	ZNF600	ZNF160	ZNF83	ZNF28	ZNF525	ZNF320	ZNF611	0.790492
coad.gse14333	null
coad.tcga	null
ov.gse9891	chr19q13.41-q13.42	ZNF468	ZNF320	ZNF765	ZNF347	ZNF415	ZNF160	ZNF677	ZNF816	ZNF331	VN1R2	VN1R4	LOC284379	0.465476
ov.tcga	null
Top genes:	ZNF816:2	ZNF468:2	ZNF160:2	ZNF320:2	ZNF578:1	ZNF761:1	ZNF813:1	ZNF137P:1	ZNF665:1	ZNF600:1
228	chr1p31.1	2	0.464475
brca.gse2034	chr1p31.1-p22.3	PIGK	ZZZ3	RABGGTB	BCL10	ACADM	USP33	RPF1	CRYZ	CTBS	GNG5	AK5	DDAH1	ELTD1	SSX2IP	0.464475
brca.tcga	null
coad.gse14333	null
coad.tcga	null
ov.gse9891	chr1p31.3-p31.1	LRRC40	USP33	ZZZ3	ANKRD13C	SERBP1	FPGT	ZRANB2	ACADM	PIGK	RABGGTB	FAM73A	SRSF11	TYW3	DNAJB4	0.474947
ov.tcga	null
Top genes:	PIGK:2	ZZZ3:2	RABGGTB:2	ACADM:2	USP33:2	BCL10:1	RPF1:1	CRYZ:1	CTBS:1	GNG5:1
229	chr12q23.2	2	0.463262
brca.gse2034	null
brca.tcga	chr12q23.1-q23.3	NUP37	TMPO	PARPBP	DEPDC4	SCYL2	ACTR6	SLC25A3	NEDD1	GAS2L3	APAF1	ARL1	UHRF1BP1L	NT5DC3	CDK17	0.463262
coad.gse14333	chr12q23.1-q23.2	NUP37	TMPO	SNRPF	PARPBP	ACTR6	NEDD1	ARL1	SLC25A3	SCYL2	PMCH	APAF1	LTA4H	UTP20	GAS2L3	0.568288
coad.tcga	null
ov.gse9891	null
ov.tcga	null
Top genes:	NUP37:2	TMPO:2	PARPBP:2	SCYL2:2	ACTR6:2	SLC25A3:2	NEDD1:2	GAS2L3:2	APAF1:2	ARL1:2
230	chr19q13.42	2	0.462119
brca.gse2034	null
brca.tcga	null
coad.gse14333	null
coad.tcga	chr19q13.41-q13.42	ZNF813	ZNF578	ZNF600	ZNF816	ZNF468	ZNF761	ZNF665	ZNF320	ZNF525	ZNF611	ZNF160	ZNF137P	ZNF765	ZNF28	0.766291
ov.gse9891	null
ov.tcga	chr19q13.41-q13.42	ZNF415	ZNF350	ZNF432	ZNF468	ZNF83	ZNF137P	ZNF665	ZNF701	ZNF175	PPP2R1A	ZNF480	ZNF611	ZNF702P	ZNF528	0.462119
Top genes:	ZNF468:2	ZNF665:2	ZNF611:2	ZNF137P:2	ZNF813:1	ZNF578:1	ZNF600:1	ZNF816:1	ZNF761:1	ZNF320:1
231	chr16q24.1	2	0.461337
brca.gse2034	null
brca.tcga	null
coad.gse14333	null
coad.tcga	chr16q23.3-q24.2	ZDHHC7	FBXO31	ZCCHC14	MBTPS1	KIAA0182	MLYCD	KIAA1609	MTHFSD	ATP2C2	USP10	COX4I1	BANP	KIAA0513	TAF1C	0.461337
ov.gse9891	null
ov.tcga	chr16q24.1-q24.3	EMC8	APRT	TRAPPC2L	MAP1LC3B	COX4I1	CYBA	SPG7	RPL13	MTHFSD	KLHDC4	GALNS	BANP	ZCCHC14	SLC7A5	0.525963
Top genes:	ZCCHC14:2	MTHFSD:2	COX4I1:2	BANP:2	ZDHHC7:1	FBXO31:1	MBTPS1:1	KIAA0182:1	MLYCD:1	KIAA1609:1
232	chrXp22.2	2	0.460462
brca.gse2034	null
brca.tcga	chrXp22.33-p22.2	GPM6B	MSL3	MID1	CLCN4	PRKX	EGFL6	MXRA5	FANCB	ASB9	PRPS2	RAB9A	TLR8	NLGN4X	HCCS	0.536093
coad.gse14333	null
coad.tcga	null
ov.gse9891	null
ov.tcga	chrXp22.33-p22.2	HCCS	PNPLA4	RAB9A	TRAPPC2	HDHD1	MSL3	PRPS2	STS	SHROOM2	OFD1	GPR143	WWC3	GYG2	TBL1X	0.460462
Top genes:	MSL3:2	PRPS2:2	RAB9A:2	HCCS:2	GPM6B:1	MID1:1	CLCN4:1	PRKX:1	EGFL6:1	MXRA5:1
233	chr3q13.2-q13.13	2	0.459052
brca.gse2034	null
brca.tcga	chr3q13.13-q13.31	CD96	TIGIT	TRAT1	ZBED2	BTLA	CD200R1	GCET2	CD200	ZNF80	CCDC80	BOC	PVRL3	ATG3	GTPBP8	0.710259
coad.gse14333	null
coad.tcga	chr3q13.12-q13.2	CD96	TRAT1	BTLA	ZBED2	CD200R1	GCET2	CCDC80	CD200	BOC	SLC35A5	HHLA2	BBX	KIAA1524	SIDT1	0.459052
ov.gse9891	null
ov.tcga	null
Top genes:	CD96:2	TRAT1:2	ZBED2:2	BTLA:2	CD200R1:2	GCET2:2	CD200:2	CCDC80:2	BOC:2	TIGIT:1
234	chr19q13.2	2	0.4589
brca.gse2034	null
brca.tcga	null
coad.gse14333	null
coad.tcga	chr19q13.2-q13.31	CEACAM3	CEACAM6	CEACAM1	CEACAM5	PSG6	PSG5	CEACAM8	ATP1A3	ZNF574	PSG4	LIPE	PSG7	ETHE1	ZNF526	0.4589
ov.gse9891	chr19q13.2	CCDC97	HNRNPUL1	ATP5SL	ZNF526	RPS19	ZNF574	BCKDHA	DEDD2	EXOSC5	SNRPA	ITPKC	C19orf54	RABAC1	ARHGEF1	0.55639
ov.tcga	null
Top genes:	ZNF574:2	ZNF526:2	CEACAM3:1	CEACAM6:1	CEACAM1:1	CEACAM5:1	PSG6:1	PSG5:1	CEACAM8:1	ATP1A3:1
235	chr3q12.2	2	0.454912
brca.gse2034	null
brca.tcga	null
coad.gse14333	null
coad.tcga	chr3q11.2-q12.3	TOMM70A	PCNP	RG9MTD1	TFG	C3orf26	CPOX	RPL24	MINA	ARL6	NIT2	CLDND1	TBC1D23	ZBTB11	IMPG2	0.454912
ov.gse9891	null
ov.tcga	chr3p11.1-q12.3	TOMM70A	ZBTB11	CPOX	MINA	NIT2	PCNP	TFG	NSUN3	RPL24	CLDND1	ZNF654	ST3GAL6	TMEM45A	DCBLD2	0.469133
Top genes:	TOMM70A:2	PCNP:2	TFG:2	CPOX:2	RPL24:2	MINA:2	NIT2:2	CLDND1:2	ZBTB11:2	RG9MTD1:1
236	chr5q22.3	2	0.453198
brca.gse2034	null
brca.tcga	null
coad.gse14333	chr5q22.3-q23.3	TMED7	PHAX	FEM1C	CSNK1G3	PGGT1B	CEP120	COMMD10	DMXL1	SNX2	SRFBP1	ISOC1	PRRC1	GRAMD3	ALDH7A1	0.53693
coad.tcga	chr5q21.1-q22.3	TMED7	SLC25A46	STARD4	SRP19	WDR36	YTHDC2	ATG12	GIN1	TRIM36	PGGT1B	CCDC112	FEM1C	AP3S1	PJA2	0.453198
ov.gse9891	null
ov.tcga	null
Top genes:	TMED7:2	FEM1C:2	PGGT1B:2	PHAX:1	CSNK1G3:1	CEP120:1	COMMD10:1	DMXL1:1	SNX2:1	SRFBP1:1
237	chr1q32.3	2	0.452864
brca.gse2034	chr1q32.3-q41	ANGEL2	RRP15	LPGAT1	NSL1	RPS6KC1	INTS7	IARS2	KCTD3	NENF	RAB3GAP2	DTL	SMYD2	GPATCH2	NEK2	0.516744
brca.tcga	null
coad.gse14333	chr1q32.2-q41	NEK2	CENPF	DTL	INTS7	DIEXF	SMYD2	FLVCR1	KCTD3	RRP15	ANGEL2	TMEM206	LPGAT1	RCOR3	RPS6KC1	0.452864
coad.tcga	null
ov.gse9891	null
ov.tcga	null
Top genes:	ANGEL2:2	RRP15:2	LPGAT1:2	RPS6KC1:2	INTS7:2	KCTD3:2	DTL:2	SMYD2:2	NEK2:2	NSL1:1
238	chr4q25	2	0.45256
brca.gse2034	chr4q23-q25	SEC24B	PPA2	LAMTOR3	AIMP1	INTS12	PLA2G12A	DNAJB14	HADH	UBE2D3	CASP6	RPL34	BDH2	GAR1	PPP3CA	0.47486
brca.tcga	null
coad.gse14333	null
coad.tcga	null
ov.gse9891	chr4q24-q25	SEC24B	PLA2G12A	INTS12	GAR1	AIMP1	UBE2D3	PPA2	RPL34	LARP7	CISD2	PAPSS1	TET2	TBCK	CASP6	0.45256
ov.tcga	null
Top genes:	SEC24B:2	PPA2:2	AIMP1:2	INTS12:2	PLA2G12A:2	UBE2D3:2	CASP6:2	RPL34:2	GAR1:2	LAMTOR3:1
239	chr15q15.3	2	0.448939
brca.gse2034	null
brca.tcga	chr15q15.2-q21.1	LCMT2	SPG11	C15orf63	SERF2	UBR1	TMEM62	PPIP5K1	TP53BP1	SORD	CASC4	MFAP1	CCNDBP1	ZSCAN29	CDAN1	0.448939
coad.gse14333	null
coad.tcga	chr15q15.1-q15.3	ZSCAN29	TUBGCP4	INO80	CDAN1	PPIP5K1	RTF1	ZFP106	TMEM87A	RPAP1	CHP1	VPS39	TP53BP1	UBR1	LRRC57	0.533979
ov.gse9891	null
ov.tcga	null
Top genes:	UBR1:2	PPIP5K1:2	TP53BP1:2	ZSCAN29:2	CDAN1:2	LCMT2:1	SPG11:1	C15orf63:1	SERF2:1	TMEM62:1
240	chr7q22.3	2	0.448372
brca.gse2034	chr7q22.1-q31.1	RINT1	PUS7	TMEM168	PSMC2	DNAJC2	PMPCB	ZNF277	DUS4L	ORC5	IFRD1	NAMPT	DLD	COG5	CBLL1	0.448372
brca.tcga	null
coad.gse14333	null
coad.tcga	null
ov.gse9891	null
ov.tcga	chr7q22.1-q31.1	COG5	DUS4L	PSMC2	RINT1	ORC5	DLD	DNAJB9	SYPL1	PUS7	PMPCB	NAMPT	CBLL1	ZNF277	SRPK2	0.51355
Top genes:	RINT1:2	PUS7:2	PSMC2:2	PMPCB:2	ZNF277:2	DUS4L:2	ORC5:2	NAMPT:2	DLD:2	COG5:2
241	chr12q22	2	0.445387
brca.gse2034	null
brca.tcga	null
coad.gse14333	null
coad.tcga	chr12q22-q23.1	METAP2	UBE2N	VEZT	NR2C1	MRPL42	CDK17	ACTR6	TMPO	SLC25A3	SNRPF	FGD6	NEDD1	NDUFA12	ELK3	0.445387
ov.gse9891	chr12q21.33-q23.1	METAP2	UBE2N	VEZT	SNRPF	NR2C1	LTA4H	NEDD1	CDK17	CCDC41	NDUFA12	MRPL42	ATP2B1	USP44	NUDT4	0.523071
ov.tcga	null
Top genes:	METAP2:2	UBE2N:2	VEZT:2	NR2C1:2	MRPL42:2	CDK17:2	SNRPF:2	NEDD1:2	NDUFA12:2	ACTR6:1
242	chr9q21.13	2	0.442595
brca.gse2034	null
brca.tcga	null
coad.gse14333	null
coad.tcga	null
ov.gse9891	chr9q21.13-q21.33	FAM108B1	NAA35	ISCA1	UBQLN1	ZFAND5	VPS13A	RFK	RMI1	C9orf85	C9orf64	NMRK1	KIF27	IDNK	CEP78	0.443863
ov.tcga	chr9q21.11-q21.13	OSTF1	TJP2	ZFAND5	NMRK1	SMC5	ANXA1	KLF9	TMEM2	FXN	C9orf40	FAM108B1	FAM189A2	ALDH1A1	APBA1	0.442595
Top genes:	FAM108B1:2	ZFAND5:2	NMRK1:2	NAA35:1	ISCA1:1	UBQLN1:1	VPS13A:1	RFK:1	RMI1:1	C9orf85:1
243	chr3q25.1	2	0.438498
brca.gse2034	null
brca.tcga	null
coad.gse14333	null
coad.tcga	chr3q24-q25.2	P2RY14	CPA3	SUCNR1	GPR171	P2RY13	TM4SF18	P2RY12	CP	SELT	COMMD2	MBNL1	HPS3	GYG1	SERP1	0.438498
ov.gse9891	chr3q23-q25.1	COMMD2	HLTF	TFDP2	ATR	U2SURP	RNF7	HPS3	GK5	XRN1	TSC22D2	SLC25A36	SERP1	WWTR1	PFN2	0.46707
ov.tcga	null
Top genes:	COMMD2:2	HPS3:2	SERP1:2	P2RY14:1	CPA3:1	SUCNR1:1	GPR171:1	P2RY13:1	TM4SF18:1	P2RY12:1
244	chr1p36.23	2	0.436013
brca.gse2034	null
brca.tcga	chr1p36.31-p36.22	ENO1	PGD	SLC25A33	MAD2L2	KIF1B	SRM	DNAJC11	MTOR	DFFA	LZIC	UBE4B	CTNNBIP1	CLSTN1	SPSB1	0.436013
coad.gse14333	null
coad.tcga	chr1p36.31-p36.22	ENO1	PGD	MTOR	DNAJC11	NOL9	EXOSC10	PEX14	PARK7	DFFA	APITD1	UBE4B	CLSTN1	TARDBP	KLHL21	0.520602
ov.gse9891	null
ov.tcga	null
Top genes:	ENO1:2	PGD:2	DNAJC11:2	MTOR:2	DFFA:2	UBE4B:2	CLSTN1:2	SLC25A33:1	MAD2L2:1	KIF1B:1
245	chr2q35	2	0.435551
brca.gse2034	null
brca.tcga	null
coad.gse14333	chr2q34-q35	AAMP	ATIC	XRCC5	ARPC2	RPE	MREG	BARD1	SMARCAL1	PNKD	TMBIM1	CTDSP1	LANCL1	RPL37A	IKZF2	0.456136
coad.tcga	null
ov.gse9891	chr2q35	AAMP	ZNF142	RNF25	CNPPD1	PNKD	ZFAND2B	BCS1L	ATG9A	ANKZF1	DNPEP	FAM134A	CTDSP1	RQCD1	NHEJ1	0.435551
ov.tcga	null
Top genes:	AAMP:2	PNKD:2	CTDSP1:2	ATIC:1	XRCC5:1	ARPC2:1	RPE:1	MREG:1	BARD1:1	SMARCAL1:1
246	chr5q23.1	2	0.435119
brca.gse2034	chr5q22.1-q23.2	DMXL1	YTHDC2	REEP5	HSD17B4	TMED7	ATG12	DCP2	SLC25A46	FEM1C	SRP19	SNX2	APC	COMMD10	FLJ11235	0.435119
brca.tcga	null
coad.gse14333	null
coad.tcga	null
ov.gse9891	null
ov.tcga	chr5q22.2-q23.2	HSD17B4	SNX2	TMED7	ATG12	SRP19	REEP5	YTHDC2	APC	FEM1C	AP3S1	SNX24	DMXL1	DCP2	TNFAIP8	0.539925
Top genes:	DMXL1:2	YTHDC2:2	REEP5:2	HSD17B4:2	TMED7:2	ATG12:2	DCP2:2	FEM1C:2	SRP19:2	SNX2:2
247	chr6p21.33	2	0.432416
brca.gse2034	null
brca.tcga	null
coad.gse14333	chr6p21.33	DHX16	GTF2H4	MRPS18B	PRRC2A	MDC1	BAG6	C6orf136	CCHCR1	TUBB	PPP1R10	NFKBIL1	VARS2	DDR1	TCF19	0.432416
coad.tcga	null
ov.gse9891	chr6p22.1-p21.33	ABCF1	DHX16	TRIM39	PPP1R11	HCG18	ZNRD1	MDC1	MRPS18B	ATAT1	C6orf136	PRR3	TRIM26	NRM	GNL1	0.580118
ov.tcga	null
Top genes:	DHX16:2	MRPS18B:2	MDC1:2	C6orf136:2	GTF2H4:1	PRRC2A:1	BAG6:1	CCHCR1:1	TUBB:1	PPP1R10:1
248	chr12p11.21	2	0.431755
brca.gse2034	null
brca.tcga	null
coad.gse14333	chr12p11.23-q12	DNM1L	ASUN	YARS2	ERGIC2	KIF21A	FAM60A	MRPS35	IPO8	FGFR1OP2	GXYLT1	C12orf35	MED21	TM7SF3	FAR2	0.505994
coad.tcga	chr12p11.21-q13.11	C12orf35	SCAF11	FGD4	KIF21A	DNM1L	GXYLT1	ARID2	BICD1	PKP2	DDX11	TWF1	SLC38A2	YARS2	SLC38A1	0.431755
ov.gse9891	null
ov.tcga	null
Top genes:	DNM1L:2	YARS2:2	KIF21A:2	GXYLT1:2	C12orf35:2	ASUN:1	ERGIC2:1	FAM60A:1	MRPS35:1	IPO8:1
249	chr6q25.1	2	0.431571
brca.gse2034	null
brca.tcga	null
coad.gse14333	null
coad.tcga	chr6q24.1-q25.1	PCMT1	KATNA1	PPIL4	VTA1	PEX3	LTV1	SF3B5	ABRACL	C6orf72	AIG1	FUCA2	TAB2	NUP43	PHACTR2	0.431571
ov.gse9891	null
ov.tcga	chr6q24.2-q25.1	PCMT1	PEX3	KATNA1	C6orf211	TAB2	SF3B5	NUP43	RMND1	RAB32	EPM2A	PHACTR2	SUMO4	SASH1	PLAGL1	0.56599
Top genes:	PCMT1:2	KATNA1:2	PEX3:2	SF3B5:2	TAB2:2	NUP43:2	PHACTR2:2	PPIL4:1	VTA1:1	LTV1:1
250	chr14q31.3	2	0.431506
brca.gse2034	chr14q31.1-q32.12	ZC3H14	EFCAB11	SPATA7	NDUFB1	GOLGA5	RPS6KA5	TRIP11	GALC	ATXN3	PSMC1	CALM1	C14orf159	PTPN21	SEL1L	0.431506
brca.tcga	null
coad.gse14333	null
coad.tcga	null
ov.gse9891	chr14q31.3-q32.12	ZC3H14	C14orf109	MOAP1	NDUFB1	BTBD7	UBR7	ATXN3	TRIP11	PSMC1	DDX24	GOLGA5	CPSF2	TDP1	TC2N	0.46569
[truncated: 418 more rows]
