# Supplementary material for: Biomolecular Events in Cancer Revealed by Attractor Metagenes
Source: PLoS Comput Biol. 2013 Feb 21;9(2):e1002920. doi: 10.1371/journal.pcbi.1002920 (PMC3581797; doi:10.1371/journal.pcbi.1002920)
Supplement: Table S3 — Association of mesenchymal transition attractor with tumor stage. (XLS) [file pcbi.1002920.s003.xls]

## Sheet: Sheet1
Breast Schuetz (GSE3893)	P=1.681*10^(-93)				TCGA Ovarian	P=3.793*10^(-80)				Colon Sieber (GSE14333)	P=7.641*10^(-78)
Gene Symbol	FC (IDC vs DCIS)	Probe Set ID	Top 100 MT Attractor		Gene Symbol	FC (Stage <= II vs >= III)	Probe Set ID	Top 100 MT Attractor		Gene Symbol	FC (Stage <= I vs >= II)	Probe Set ID	Top 100 MT Attractor
COL11A1	6.4969	37892_at	V		COL11A1	3.3477	37892_at	V		SPP1	2.8621	209875_s_at
COL10A1	4.0723	217428_s_at	V		COL10A1	2.182	205941_s_at	V		COL10A1	2.7588	217428_s_at	V
MFAP5	3.7326	213764_s_at			TIMP3	2.0341	201147_s_at	V		COL11A1	2.1742	37892_at	V
LRRC15	3.61	213909_at	V		POSTN	2.0081	210809_s_at	V		SFRP2	2.1104	223122_s_at	V
INHBA	3.442	210511_s_at	V		THBS2	1.9928	203083_at	V		GAS1	2.0787	204457_s_at	V
FBN1	3.4276	202766_s_at	V		EPYC	1.9363	206439_at			ASPN	2.0509	219087_at	V
SULF1	3.3526	212353_at	V		COL5A2	1.8916	221730_at	V		GREM1	1.9002	218469_at
GREM1	3.3509	218468_s_at			MMP11	1.8764	203878_s_at			CDKN2B	1.8857	236313_at
COL5A2	3.2224	221730_at	V		ASPN	1.8749	219087_at	V		PLN	1.8525	204939_s_at
LOX	3.2224	215446_s_at	V		LUM	1.8672	201744_s_at	V		VIP	1.8314	206577_at
COL5A1	3.0768	212489_at	V		VCAN	1.8248	221731_x_at	V		CYP1B1	1.8252	202437_s_at
THBS2	2.9912	203083_at	V		FAP	1.8002	209955_s_at	V		THBS2	1.8195	203083_at	V
LAMB1	2.9732	201505_at			COMP	1.7683	205713_s_at			COL8A1	1.7982	226237_at
FAP	2.9597	209955_s_at	V		GAS1	1.7615	204457_s_at	V		SULF1	1.7925	212353_at	V
SPOCK1	2.9078	202363_at	V		INHBA	1.7523	210511_s_at	V		POSTN	1.7839	1555778_a_at	V
PLXNC1	2.8994	213241_at			PTGIS	1.7284	208131_s_at			MAB21L2	1.7834	210302_s_at
PLAU	2.8901	205479_s_at	V		COL5A1	1.7282	212488_at	V		TAC1	1.7577	206552_s_at
LY96	2.8817	206584_at			THY1	1.7176	213869_x_at	V		HOPX	1.7571	211597_s_at
MMP1	2.8321	204475_at			CTSK	1.6964	202450_s_at	V		TNFAIP6	1.7561	206026_s_at	V
ADAM12	2.8293	202952_s_at	V		LRRC15	1.6921	213909_at	V		AKAP12	1.7435	210517_s_at
AEBP1	2.8125	201792_at	V		MMP2	1.6858	201069_at	V		TAGLN	1.7347	205547_s_at	V
NID2	2.806	204114_at	V		AEBP1	1.6624	201792_at	V		GULP1	1.7246	204237_at
COL6A2	2.7734	209156_s_at	V		PCP4	1.654	205549_at			FNDC1	1.7208	226930_at	V
DACT1	2.7399	219179_at	V		SFRP4	1.6459	204051_s_at	V		SPOCK1	1.7103	202363_at	V
ASPN	2.7294	219087_at	V		MAL	1.6378	204777_s_at			OLR1	1.6912	210004_at
VCAN	2.6995	204619_s_at	V		NNMT	1.6152	202237_at	V		NTM	1.6858	227566_at	V
RGS4	2.6886	204337_at			COL3A1	1.6084	201852_x_at	V		MSRB3	1.6743	225782_at	V
HLA-DRA	2.6326	210982_s_at			CDH6	1.5951	205532_s_at			HMCN1	1.6684	235944_at
BGN	2.626	213905_x_at	V		LOX	1.5916	215446_s_at	V		ADAM12	1.665	226777_at	V
TNFAIP6	2.6098	206026_s_at	V		COL1A1	1.5883	202311_s_at	V		CXCL5	1.6608	214974_x_at
NOX4	2.6063	219773_at	V		TAGLN	1.5781	205547_s_at	V		PCDH7	1.6598	228640_at
NID1	2.591	202007_at			FBN1	1.5747	202766_s_at	V		CTHRC1	1.6552	225681_at	V
CDH11	2.5883	207173_x_at	V		CYR61	1.5719	210764_s_at			SYNPO2	1.6517	227662_at
MMP13	2.5394	205959_at			PDGFD	1.5694	219304_s_at			DSG3	1.6439	235075_at
OLFML2B	2.5338	213125_at	V		PCOLCE	1.5682	202465_at	V		TNS1	1.6427	221748_s_at
LAMA4	2.5154	202202_s_at			NLGN4X	1.5645	221933_at			SFRP4	1.6385	204051_s_at	V
FERMT2	2.5049	209210_s_at			NR2F1	1.5583	209505_at			TNC	1.6374	201645_at
LOXL2	2.4518	202998_s_at			CRYAB	1.5503	209283_at			MYL9	1.6354	201058_s_at
EDNRA	2.4459	204464_s_at	V		FABP4	1.5496	203980_at			CALB1	1.631	205625_s_at
ZEB1	2.4393	212764_at			FGF18	1.5487	206987_x_at			FAP	1.6302	209955_s_at	V
MMP2	2.411	201069_at	V		ALDH1A2	1.5438	207016_s_at			TIMP3	1.6121	201150_s_at	V
AHNAK2	2.4044	212992_at			DCN	1.5423	209335_at	V		FN1	1.6004	216442_x_at	V
HLA-DMA	2.4007	217478_s_at			FRZB	1.5363	203697_at			MGP	1.6	202291_s_at
COL3A1	2.3942	201852_x_at	V		EDNRA	1.5231	204464_s_at	V		LOX	1.589	215446_s_at	V
ISLR	2.3924	207191_s_at			PDGFRL	1.5213	205226_at			CD109	1.5866	226545_at
CTSK	2.3883	202450_s_at	V		PLAU	1.5205	205479_s_at	V		INHBA	1.5691	227140_at	V
MS4A4A	2.3769	219607_s_at			PCSK5	1.5153	205559_s_at			ANTXR1	1.5589	224694_at	V
WIPF1	2.3746	202664_at			MFAP4	1.5118	212713_at			IBSP	1.5585	236028_at
COL1A1	2.3744	202310_s_at	V		LRRC17	1.5103	205381_at			VGLL3	1.557	227399_at
SNAI2	2.3689	213139_at	V		ACTA2	1.5053	200974_at	V		KAL1	1.5526	205206_at
ITGBL1	2.3678	205422_s_at	V		NUAK1	1.5029	204589_at	V		NEXN	1.5455	226103_at	V
DNM3	2.3529	209839_at			AQP1	1.5015	209047_at			FRMD6	1.54	225481_at	V
KCTD12	2.3479	212192_at			NBL1	1.4955	37005_at			CCDC80	1.5393	225242_s_at	V
HLA-DPA1	2.3466	213537_at			ADH1B	1.4888	209613_s_at			DKK2	1.5352	219908_at
ZEB2	2.3465	203603_s_at			CXCL14	1.4888	218002_s_at			IGFBP5	1.5348	211959_at
SERPINF1	2.3454	202283_at	V		PDLIM3	1.4873	209621_s_at			AOC3	1.5251	204894_s_at
SPON1	2.3295	213994_s_at			SRPX	1.4869	204955_at			PLA2G16	1.5234	209581_at
DCN	2.3283	211896_s_at	V		CTGF	1.4701	209101_at			GPNMB	1.521	201141_at
HTRA1	2.3143	201185_at	V		CRISPLD2	1.4663	221541_at	V		ITGBL1	1.5202	205422_s_at	V
NNMT	2.3051	202237_at	V		KIAA1199	1.4621	212942_s_at			MFAP5	1.5199	209758_s_at
GBP1	2.2799	202270_at			SLIT2	1.4517	209897_s_at			AHNAK2	1.5198	212992_at
ROBO1	2.2746	213194_at			MFAP5	1.4505	213764_s_at			EFEMP1	1.5175	201842_s_at
GPX7	2.2712	213170_at			BGN	1.4488	201261_x_at	V		ACTG2	1.5146	202274_at
RECK	2.2674	205407_at			FBLN1	1.4488	202994_s_at			PPAPDC1A	1.5141	236044_at	V
TCF4	2.2603	213891_s_at			SERPINF1	1.4477	202283_at	V		CCL18	1.5107	32128_at
DSE	2.2583	218854_at			APOA1	1.4428	217073_x_at			ISLR	1.5056	207191_s_at
MMP11	2.2434	203878_s_at			ERBB4	1.4415	214053_at			DES	1.502	202222_s_at
COL8A2	2.234	221900_at	V		FN1	1.4403	212464_s_at	V		SORBS1	1.5011	218087_s_at
C1QB	2.2299	202953_at			C1QTNF3	1.4355	220988_s_at			VCAN	1.5	204619_s_at	V
SRPX2	2.2255	205499_at			MFAP2	1.4316	203417_at			COL1A1	1.4977	202310_s_at	V
CLEC7A	2.2238	221698_s_at			TMEM158	1.4294	213338_at			COL1A2	1.4937	229218_at	V
QKI	2.2218	212636_at			IGFBP2	1.4292	202718_at			SLC2A3	1.4935	202499_s_at
SAMSN1	2.2161	220330_s_at			RHOBTB3	1.4272	202975_s_at			BGN	1.4897	213905_x_at	V
HLA-DPB1	2.2129	201137_s_at			EFEMP1	1.425	201842_s_at			MMP11	1.4866	203876_s_at
COL14A1	2.2041	212865_s_at			GUCY1A3	1.4231	221942_s_at			TPM2	1.4829	204083_s_at
POSTN	2.1853	210809_s_at	V		PDGFRA	1.4209	203131_at			RAB31	1.479	217762_s_at	V
CTGF	2.1821	209101_at			FST	1.4195	204948_s_at			TSPAN2	1.4774	227236_at
OLFML1	2.1803	217525_at	V		PTRF	1.4193	208789_at	V		CRISPLD1	1.4732	223475_at
ZFPM2	2.1768	219778_at			SLIT3	1.4186	203813_s_at			COMP	1.4691	205713_s_at
ADCY7	2.1745	203741_s_at			APBB2	1.4174	212985_at			COL3A1	1.467	232458_at	V
COL15A1	2.1699	203477_at			C7orf10	1.4168	219655_at			TREM1	1.4655	219434_at
COL1A2	2.1605	202403_s_at	V		ETV1	1.4147	221911_at			CYBRD1	1.4654	222453_at
LOXL1	2.154	203570_at	V		SPOCK1	1.4141	202363_at	V		WWTR1	1.4644	202133_at
MXRA5	2.1521	209596_at	V		WASF1	1.4127	204165_at			CNN1	1.464	203951_at
DPYD	2.1453	204646_at			TWIST1	1.4125	213943_at			SHISA2	1.4635	230493_at
HEPH	2.1401	203903_s_at			MYH10	1.4117	213067_at			MITF	1.4614	226066_at
TGFB1I1	2.1347	209651_at	V		SPARC	1.411	212667_at	V		EREG	1.4612	205767_at
HLA-DRB1	2.123	208306_x_at			MXRA8	1.4107	213422_s_at	V		MEIS2	1.4609	207480_s_at
COL6A3	2.1061	201438_at	V		UPK3B	1.4056	206658_at			EPYC	1.4579	206439_at
FSTL1	2.1039	208782_at	V		TCF4	1.4044	222146_s_at			FBN1	1.4577	235318_at	V
SGCD	2.1007	213543_at			ITGBL1	1.3965	205422_s_at	V		COLEC12	1.4572	221019_s_at
LCP2	2.0951	205269_at			CDH11	1.3929	207172_s_at	V		BCAT1	1.4557	226517_at
MAF	2.0929	209348_s_at			ISLR	1.3917	207191_s_at			TIMP2	1.453	231579_s_at
SPARC	2.0889	212667_at	V		AKAP12	1.3911	210517_s_at			C5AR1	1.4527	220088_at
ACSL4	2.0825	202422_s_at			SOX9	1.3873	202935_s_at			BHLHE41	1.45	221530_s_at
SLC2A3	2.0822	202499_s_at			ADAM12	1.385	202952_s_at	V		CALD1	1.4486	201616_s_at	V
IGL@	2.0788	209138_x_at			PLVAP	1.383	221529_s_at			SCG2	1.4478	204035_at
HEG1	2.0718	213069_at	V		NCAM1	1.3785	212843_at			COL5A2	1.4447	221730_at	V
MS4A6A	2.0708	219666_at			SOX11	1.3782	204914_s_at			STON1	1.4419	213413_at
RGS2	2.0657	202388_at			SLC16A3	1.3772	202856_s_at			IFIT1	1.4415	203153_at
