# Supplementary material for: Biomolecular Events in Cancer Revealed by Attractor Metagenes
Source: PLoS Comput Biol. 2013 Feb 21;9(2):e1002920. doi: 10.1371/journal.pcbi.1002920 (PMC3581797; doi:10.1371/journal.pcbi.1002920)
Supplement: Table S4 — Association of mitotic CIN attractor with tumor grade. (XLS) [file pcbi.1002920.s004.xls]

## Sheet: Grade
Breast Miller (GSE3494)	P=3.588*10^(-74)				TCGA Ovarian	P=3.391*10^(-69)				Bladder Kim (GSE13507)	P=2.571*10^(-49)
Gene Symbol	FC (<= G1 vs >= G2)	Probe Set ID	Top 100 Mitotic CIN Attractor		Gene Symbol	FC (<= G1 vs >= G2)	Probe Set ID	Top 100 Mitotic CIN Attractor		Gene Symbol	FC (<= G1 vs >= G2)	Probe Set ID	Top 100 Mitotic CIN Attractor
MMP1	2.4602	204475_at			IGL@	9.2093	209138_x_at			S100A8	5.9152	ILMN_1729801
TOP2A	1.9777	201291_s_at	V		ISG15	6.9305	205483_s_at			C15orf48	3.7258	ILMN_1805410
S100P	1.932	204351_at			CDC20	5.9841	202870_s_at	V		S100A9	2.9635	ILMN_1714991
RRM2	1.8386	201890_at	V		TPX2	5.2979	210052_s_at	V		TOP2A	2.8957	ILMN_1686097	V
CXCL11	1.8003	211122_s_at			TTK	4.9882	204822_at	V		CDCA5	2.8643	ILMN_1683450	V
CDK1	1.7674	203213_at	V		CDKN2A	4.9505	209644_x_at			RARRES1	2.8507	ILMN_1800091
CDC20	1.7632	202870_s_at	V		KIF2C	4.6911	209408_at	V		UBE2C	2.8394	ILMN_1742958	V
CXCL10	1.7536	204533_at			TOP2A	4.5832	201291_s_at	V		TUBB3	2.8179	ILMN_1791726
ASPM	1.7484	219918_s_at	V		IGKC	4.4683	214669_x_at			CEACAM6	2.7497	ILMN_1712522
CEP55	1.7464	218542_at	V		CXCL10	4.4451	204533_at			TPX2	2.7362	ILMN_1792494	V
AURKA	1.7444	208079_s_at	V		CENPA	4.3084	204962_s_at	V		CDC20	2.7208	ILMN_1663390	V
S100A8	1.744	202917_s_at			PRC1	4.2353	218009_s_at	V		CCNB2	2.6991	ILMN_1801939	V
CKS2	1.7241	204170_s_at			NUSAP1	4.1536	219978_s_at	V		MTHFD2	2.6174	ILMN_1674706
CCNB1	1.7224	214710_s_at	V		ASPM	4.1426	219918_s_at	V		IL8	2.602	ILMN_1666733
CXCL9	1.7222	203915_at			LAMP3	4.0153	205569_at			IGFL1	2.5975	ILMN_1743950
PRC1	1.7043	218009_s_at	V		COL11A1	3.9381	37892_at			LOC642113	2.5567	ILMN_1652199
MAD2L1	1.7008	203362_s_at	V		NDC80	3.9256	204162_at	V		HMOX1	2.5458	ILMN_1800512
PEG10	1.6896	212094_at			IFIT1	3.8733	203153_at			TRIP13	2.5414	ILMN_1796589	V
CENPF	1.6655	207828_s_at	V		DLGAP5	3.8253	203764_at	V		TK1	2.5409	ILMN_1806037	V
NEK2	1.6543	204641_at	V		GBP1	3.819	202270_at			TEAD2	2.5403	ILMN_1682781
BIRC5	1.6448	202095_s_at	V		CENPF	3.8009	207828_s_at	V		CTHRC1	2.4877	ILMN_1725090
HN1	1.6421	217755_at			IFI6	3.7496	204415_at			DHCR24	2.4853	ILMN_1725510
MLF1IP	1.6416	218883_s_at			UBE2C	3.7352	202954_at	V		LOC652493	2.4686	ILMN_1739508
UBE2S	1.6413	202779_s_at			GGH	3.6833	203560_at			UCHL1	2.4672	ILMN_1757387
TTK	1.6396	204822_at	V		RSAD2	3.6645	213797_at			CEP55	2.4556	ILMN_1747016	V
KIF11	1.6383	204444_at	V		KLK5	3.5902	222242_s_at			FAM83D	2.4385	ILMN_1781943	V
SLC7A5	1.6377	201195_s_at			STAT1	3.5735	209969_s_at			AURKA	2.4141	ILMN_1680955	V
ZWINT	1.6366	204026_s_at	V		BIRC5	3.5312	202095_s_at	V		SELM	2.4048	ILMN_1651429
GBP1	1.6344	202269_x_at			UCHL1	3.5296	201387_s_at			E2F2	2.3934	ILMN_1777233
NUSAP1	1.6219	218039_at	V		NMU	3.4502	206023_at			PI3	2.3869	ILMN_1693192
MELK	1.6195	204825_at	V		KIF20A	3.4297	218755_at	V		MT2A	2.3671	ILMN_1690957
RACGAP1	1.6172	222077_s_at	V		ATAD2	3.4244	218782_s_at			NMU	2.364	ILMN_1740250
MMP9	1.6113	203936_s_at			EGFL6	3.4243	219454_at			SBSN	2.3518	ILMN_1712759
SLAMF8	1.6094	219386_s_at			RRM2	3.4175	209773_s_at	V		APOE	2.3464	ILMN_1740938
TRIP13	1.6012	204033_at	V		EZH2	3.3445	203358_s_at	V		IQGAP3	2.3415	ILMN_1813638
LAPTM4B	1.5973	208029_s_at			CEP55	3.3362	218542_at	V		KRT16	2.3394	ILMN_1736760
CENPA	1.597	204962_s_at	V		MELK	3.3234	204825_at	V		PRC1	2.2955	ILMN_1728934	V
PBK	1.594	219148_at	V		CCNB2	3.2893	202705_at	V		CKAP2L	2.2938	ILMN_1751776
CALML5	1.5931	220414_at			CDKN3	3.2867	209714_s_at	V		CENPF	2.2688	ILMN_1664516	V
CNIH4	1.5923	218728_s_at			KIF1A	3.1999	203849_s_at			NCAPG	2.2675	ILMN_1751444	V
DTL	1.592	218585_s_at	V		AURKA	3.1867	208079_s_at	V		POLQ	2.2641	ILMN_1740291
ECT2	1.5847	219787_s_at	V		CXCL11	3.1778	210163_at			CENPA	2.2482	ILMN_1801257	V
UBE2C	1.5767	202954_at	V		BCL11A	3.1641	210347_s_at			DSC2	2.2448	ILMN_1782125
TYMS	1.5673	202589_at			TMEFF1	3.1494	205122_at			TM4SF1	2.2447	ILMN_1770338
BUB1B	1.5672	203755_at	V		CXCL9	3.1353	203915_at			KIF2C	2.2411	ILMN_1685916	V
NDC80	1.566	204162_at	V		IFI44L	3.0677	204439_at			NUSAP1	2.2338	ILMN_1726720	V
TMEM97	1.5625	212281_s_at			PLIN2	3.0559	209122_at			KRT14	2.232	ILMN_1665035
STAT1	1.5614	209969_s_at			CDCA3	3.0558	221436_s_at	V		CKS1B	2.2219	ILMN_1719256
CXCL13	1.5503	205242_at			PBK	3.0506	219148_at	V		ASPM	2.2171	ILMN_1815184	V
CCNE2	1.5484	205034_at			PRSS2	3.0165	205402_x_at			KIF20A	2.2136	ILMN_1695658	V
C1orf106	1.548	219010_at			PTTG1	3.0053	203554_x_at	V		LOC652694	2.2121	ILMN_1771919
GGH	1.5429	203560_at			UBE2S	2.9924	202779_s_at			IMPA2	2.2106	ILMN_1727639
KPNA2	1.5361	211762_s_at	V		CCNE1	2.988	213523_at			TTK	2.2022	ILMN_1788166	V
FOXM1	1.5241	202580_x_at	V		IGJ	2.9801	212592_at			GGH	2.1973	ILMN_1681754
DLGAP5	1.514	203764_at	V		ECT2	2.9754	219787_s_at	V		HIST1H1C	2.1969	ILMN_1757406
GINS1	1.5133	206102_at			CDK1	2.9739	210559_s_at	V		PMP22	2.1937	ILMN_1785646
H2AFZ	1.5052	200853_at			BUB1	2.96	209642_at	V		CDCA8	2.1934	ILMN_1709294	V
MYBL1	1.4999	213906_at			PCP4	2.9345	205549_at			E2F1	2.1894	ILMN_1800738
TPX2	1.4993	210052_s_at	V		CCNB1	2.9342	214710_s_at	V		ASF1B	2.187	ILMN_1695414	V
KIAA0101	1.4974	202503_s_at			APOE	2.9314	203382_s_at			SPRR3	2.175	ILMN_1810835
YWHAZ	1.4941	200641_s_at			IGKV4-1	2.9154	214777_at			SPRR1A	2.1656	ILMN_1716591
KIF4A	1.494	218355_at	V		APOA1	2.9015	204450_x_at			MMD	2.1623	ILMN_1733937
SRD5A1	1.4927	204675_at			MMP9	2.8796	203936_s_at			TACC3	2.1603	ILMN_1724407	V
ADAMDEC1	1.4844	206134_at			CEBPG	2.8674	204203_at			LOC647450	2.1602	ILMN_1699214
EZH2	1.4831	203358_s_at	V		PRAME	2.8288	204086_at			NNMT	2.1587	ILMN_1715508
CDKN3	1.4822	209714_s_at	V		NCAPG	2.8095	218662_s_at	V		RBP1	2.1528	ILMN_1656837
SLC16A3	1.4817	202856_s_at			RAD51AP1	2.7968	204146_at	V		KRT20	2.1507	ILMN_1794729
LYZ	1.4805	213975_s_at			ZWINT	2.7886	204026_s_at	V		TXNRD1	2.1503	ILMN_1717056
MTHFD2	1.4781	201761_at			GINS1	2.7722	206102_at			CCL8	2.1499	ILMN_1772964
SQLE	1.466	209218_at			VTCN1	2.7641	219768_at			PYCR1	2.1456	ILMN_1796013
SMC4	1.4615	201664_at	V		CDCA8	2.7293	221520_s_at	V		SPRR1B	2.1428	ILMN_1711174
KIF20A	1.455	218755_at	V		IGKV1-5	2.7249	214768_x_at			FLNC	2.1401	ILMN_1715748
HMGB2	1.4465	208808_s_at			POSTN	2.7151	210809_s_at			S100A10	2.1357	ILMN_1796712
ISG15	1.4461	205483_s_at			TSPYL5	2.7134	213122_at			CCDC109B	2.1308	ILMN_1801766
BUB1	1.4455	209642_at	V		IFI44	2.7124	214453_s_at			MT1G	2.1279	ILMN_1715401
CCNB2	1.4443	202705_at	V		NRAS	2.7117	202647_s_at			RAD54L	2.1204	ILMN_1658027	V
ATAD2	1.4421	218782_s_at			MKI67	2.6923	212022_s_at	V		SLC29A4	2.1187	ILMN_1801377
GMNN	1.4419	218350_s_at			HN1	2.6904	217755_at			CDCA3	2.1172	ILMN_1737728	V
HMGB3	1.4402	203744_at			CRABP2	2.6901	202575_at			KDELR3	2.0931	ILMN_1713901
NCAPG	1.4373	218662_s_at	V		KPNA2	2.6878	211762_s_at	V		CDT1	2.0914	ILMN_1651237
ISG20	1.4355	204698_at			SYNCRIP	2.6762	217834_s_at			SH3KBP1	2.085	ILMN_1652650
MRPL13	1.4341	218049_s_at			BUB1B	2.668	203755_at	V		AURKB	2.0846	ILMN_1684217	V
APOE	1.4338	203381_s_at			CRABP1	2.659	205350_at			SLC2A3	2.0737	ILMN_1775708
MTDH	1.4335	212250_at			KIAA0101	2.6563	202503_s_at			LOC649923	2.0676	ILMN_1804601
MST4	1.432	218499_at			MX2	2.6457	204994_at			MCM2	2.0616	ILMN_1681503
GINS2	1.4319	221521_s_at			HERC5	2.6399	219863_at			SPP1	2.0614	ILMN_1651354
SOX11	1.4317	204913_s_at			MFAP2	2.6111	203417_at			UHRF1	2.0522	ILMN_1786065
TAP1	1.4255	202307_s_at			APOBEC3B	2.607	206632_s_at			MAN1C1	2.0499	ILMN_1713807
KYNU	1.4219	217388_s_at			MAL	2.5876	204777_s_at			CENPM	2.0481	ILMN_1668814
APOBEC3B	1.4213	206632_s_at			DDX58	2.5826	218943_s_at			TMEM158	2.0451	ILMN_1792455
RAD51AP1	1.4202	204146_at	V		TMEM48	2.5587	218073_s_at			TNNT1	2.0444	ILMN_1717297
MTFR1	1.4195	203207_s_at			GNAS	2.5484	214157_at			TROAP	2.0433	ILMN_1700337
NME1	1.4181	201577_at			TNFAIP6	2.5418	206026_s_at			RBPMS2	2.0428	ILMN_1808238
CD24	1.4178	208650_s_at			GPC4	2.5355	204983_s_at			TUBB2B	2.0408	ILMN_1680874
PSMB9	1.4163	204279_at			PTH2R	2.5256	206772_at			CALD1	2.0373	ILMN_1730487
LMNB1	1.4125	203276_at			RACGAP1	2.5224	222077_s_at	V		ANLN	2.0371	ILMN_1739645	V
BOP1	1.411	212563_at			MSX1	2.5075	205932_s_at			GP1BB	2.0309	ILMN_1789627
C6orf62	1.4087	213872_at			ANP32E	2.5027	208103_s_at			CRH	2.0304	ILMN_1668035
TCEB1	1.4085	202824_s_at			KIF15	2.4956	219306_at	V		MMP3	2.0283	ILMN_1784459
IGHM	1.4075	216491_x_at			IGLJ3	2.4701	211798_x_at			C11orf75	2.0202	ILMN_1798270

## Sheet: Stage
Breast Schutz (GSE3893)	p=7.961*10^(-78)			TCGA Ovarian	P=4.946*10^(-73)			Colon Sieber (GSE14333)	p=4.891*10^(-48)			Bladder Leem (GSE13507)	p=3.237*10^(-23)
Gene Symbol	FC (IDC vs DCIS)	Top 100 MT Attractor		Gene Symbol	FC (Stage <= II vs >= III)	Top 100 MT Attractor		Gene Symbol	FC (Stage <= I vs >= II)	Top 100 MT Attractor		Gene Symbol	FC (Stage <= I vs >= II)	Top 100 MT Attractor
COL11A1	2.36401	V		COL11A1	1.56303	V		SPP1	1.51706			S100A8	2.07954
COL10A1	1.92103	V		POSTN	1.00998	V		COL10A1	1.24447	V		MT2A	1.76447
LRRC15	1.85202	V		COL10A1	0.941119	V		ASPN	0.972272	V		CTGF	1.67662
GREM1	1.71111	V		EPYC	0.921506			COL11A1	0.907059	V		FLNC	1.59452
MFAP5	1.60249	V		THBS2	0.914985	V		SFRP2	0.900194			ACTG2	1.57035
THBS2	1.58072	V		ASPN	0.876394	V		GREM1	0.894166	V		SLC2A3	1.56554
FAP	1.56543	V		LUM	0.853676	V		VIP	0.872916			ATF3	1.55707
COL5A2	1.5436	V		FAP	0.832867	V		THBS2	0.863569	V		CALD1	1.54968	V
SPOCK1	1.53994	V		LRRC15	0.820562	V		TAC1	0.813653			TUBB2B	1.46206
LY96	1.5269			PCP4	0.807484			HOPX	0.813212			IL8	1.45414
MMP1	1.50189			COL5A2	0.779338	V		PLN	0.806869			SERPINE2	1.44812
AEBP1	1.49188	V		TIMP3	0.772412	V		FNDC1	0.783088			FOSB	1.42884
NID2	1.48854	V		COMP	0.758387			SPOCK1	0.77428	V		AEBP1	1.41016	V
DACT1	1.45414	V		CTSK	0.715654	V		SULF1	0.769882	V		CTHRC1	1.40946
COL5A1	1.45122	V		MAL	0.684054			TAGLN	0.769603	V		RBP1	1.39648
ASPN	1.44858	V		NNMT	0.66297	V		TNFAIP6	0.76617	V		CYR61	1.37356
NOX4	1.38202	V		VCAN	0.655192	V		OLR1	0.758016			NNMT	1.36374	V
SULF1	1.38003	V		MMP2	0.650155	V		HMCN1	0.738481			TMEM158	1.35648
HLA-DRA	1.36598			COL5A1	0.635436	V		CTHRC1	0.727016			RGS1	1.34001
MMP13	1.34447			AEBP1	0.632831	V		MYL9	0.709611			C15ORF48	1.33796
OLFML2B	1.34129	V		THY1	0.594731	V		AKAP12	0.708958			MT1A	1.32803
VCAN	1.31207	V		PCOLCE	0.589601	V		FAP	0.70501	V		CNN1	1.32027
MMP2	1.26965	V		PDGFD	0.585681			MGP	0.678104			TUBB3	1.30933
AHNAK2	1.2657			SFRP4	0.568869	V		CALB1	0.670249			TAGLN	1.30367	V
HLA-DMA	1.26347			CTGF	0.561826			GULP1	0.638431			MT1G	1.291
ISLR	1.25848			APOA1	0.55882			SFRP4	0.638029	V		UCHL1	1.28981
CTSK	1.25596	V		PDGFRL	0.558671			KAL1	0.634715			COL1A1	1.28631	V
MS4A4A	1.24905			FABP4	0.558524			MAB21L2	0.634237			TUBB6	1.28304
SNAI2	1.2442	V		TAGLN	0.558022	V		DKK2	0.618383			SELM	1.26985
ITGBL1	1.24356	V		CRYAB	0.555724			AOC3	0.608934			GFPT2	1.26953	V
DNM3	1.23443			CXCL14	0.55417			PLA2G16	0.607312			PTRF	1.25506	V
ZEB2	1.2305			NUAK1	0.545177	V		GPNMB	0.605009			ACTC1	1.2461
SERPINF1	1.22983	V		MFAP4	0.543354			ITGBL1	0.604232	V		TEAD2	1.23132
HTRA1	1.21059	V		PLAU	0.535697	V		ACTG2	0.598921			MTHFD2	1.23111
LAMB1	1.19586			NLGN4X	0.534779			PPAPDC1A	0.598426			C14ORF78	1.22669
ROBO1	1.18562			SRPX	0.513724			ISLR	0.590339			PALLD	1.22488	V
GPX7	1.18345			GAS1	0.505917	V		TIMP3	0.581683	V		EGR1	1.22459
RECK	1.18107			C1QTNF3	0.504223			POSTN	0.581243	V		PCP4	1.22082
COL1A1	1.17898	V		ACTA2	0.502866	V		GAS1	0.575127	V		ITGA5	1.20585
DSE	1.17522	V		LRRC17	0.501748			EFEMP1	0.572943			SFRP1	1.20147
FBN1	1.16598	V		CRISPLD2	0.499881	V		NEXN	0.56996			C9ORF19	1.19864
C1QB	1.157			KIAA1199	0.498611			FRMD6	0.566399			CCL2	1.19154
SRPX2	1.15415			CYR61	0.497638			CRISPLD1	0.558941			RBPMS2	1.18747
CLEC7A	1.15304			SPOCK1	0.493154	V		COMP	0.554965			IMPA2	1.18727
SAMSN1	1.14803			SERPINF1	0.491843	V		TREM1	0.551388			COL5A2	1.18244	V
HLA-DPB1	1.14597			IGFBP2	0.491028			FN1	0.551203	V		LOC387763	1.18233
TNFAIP6	1.14382	V		GUCY1A3	0.487005			CNN1	0.549957			DES	1.17196
POSTN	1.12785	V		NBL1	0.483029			SHISA2	0.54941			MYH11	1.17136
CTGF	1.12573			SLIT2	0.47977			EREG	0.547126			RGS2	1.17085
OLFML1	1.12453	V		FBN1	0.479748	V		MEIS2	0.546873			GALNAC4S-6ST	1.15416
ZFPM2	1.12218	V		TWIST1	0.479144			MMP11	0.545112			CRIP1	1.15367
ADCY7	1.12066			MFAP2	0.47914			EPYC	0.543854			ADAMTS4	1.15033
COL15A1	1.11764			COL3A1	0.478042	V		COLEC12	0.543197	V		PI3	1.14762
LOXL1	1.107	V		ITGBL1	0.476834	V		CDKN2B	0.539225			S100A9	1.14726
MXRA5	1.10578	V		DCN	0.475426	V		C5AR1	0.538721			CCL8	1.14609
DPYD	1.10119			PVRL3	0.471638			HSPB1	0.535171			TXNRD1	1.14096
HEPH	1.09765			FRZB	0.470487			RAB31	0.53434	V		IER3	1.1332
TGFB1I1	1.09404	V		C7orf10	0.466044			SCG2	0.533873			MMD	1.13204
HLA-DPA1	1.09372			MSLN	0.46496			DSG3	0.528956			CRYAB	1.12499
COL6A3	1.07455	V		GPX3	0.459972			IFIT1	0.52753			NMU	1.12427
FSTL1	1.07304	V		CXCL12	0.443212			MFAP5	0.525678	V		PMP22	1.12381	V
BGN	1.07267	V		TNFSF4	0.436125			SYNM	0.524984			KIAA0367	1.12381
PLAU	1.07233	V		HOXA5	0.432077			VCAN	0.523241	V		TNC	1.12371
ACSL4	1.05828			COL1A1	0.430624	V		COL5A2	0.518182	V		DUSP1	1.11799
DCN	1.05479	V		MFAP5	0.424615	V		FBN1	0.513835	V		SNCAIP	1.11515
MS4A6A	1.05019			FBN2	0.421291			MYLK	0.513371			FAM83D	1.1084
RGS2	1.04662			HNT	0.421157			HSPB8	0.510832			COL6A3	1.10469	V
SCG5	1.03689			COLEC12	0.42098	V		AEBP1	0.506256	V		SGCE	1.10346
COL6A2	1.03355	V		PCSK5	0.420724			CCL18	0.506159			PLEKHA4	1.09778
CLEC2B	1.02999			HBA2	0.416176			ZFPM2	0.493114	V		COL3A1	1.0952	V
C1QA	1.02696			AKAP12	0.415054			SERPINB2	0.493058			ANXA1	1.09432
EVI2A	1.02622			LPPR4	0.413546			UGT2B17	0.49241			TIMP2	1.08362
C13orf15	1.02413			TMEM158	0.41032			SPARCL1	0.491213			SLFN11	1.07886
NNMT	1.01701	V		AQP1	0.408561			ENO2	0.491122			HSPB6	1.07795
EVI2B	1.00937			GLDC	0.407397			PRKCDBP	0.490124			CLIP3	1.07783
LUM	1.00614	V		MXRA8	0.404017	V		BGN	0.487233	V		DPYSL3	1.07685	V
COL1A2	1.0053	V		SLIT3	0.403748			RAI14	0.478736			ACTN1	1.07602
F2R	1.00291			EDNRA	0.402791	V		SRPX	0.477217			LOC642113	1.06915
LRRC17	1.00211			GLT8D2	0.398397	V		DES	0.476175			LGALS1	1.06739	V
TNFSF4	1.00183			WASF1	0.394932			COL1A2	0.473785	V		PGM5	1.06714
CPA3	1.00123			NOX4	0.393678	V		MIR100HG	0.473689			C1ORF24	1.0658
VCAM1	1.00074			PLVAP	0.390075			UCHL1	0.471259			TM4SF1	1.05979
MFAP2	0.998725			MXRA5	0.388	V		DPYSL3	0.470373	V		COL5A1	1.05649	V
CXCR7	0.995846			INHBA	0.387884	V		COL5A1	0.46745	V		PHLDA1	1.05619
CH25H	0.993094			UPK3B	0.387385			CYP1B1	0.466108			RARRES1	1.05426
SYNDIG1	0.98774			UCHL1	0.385084			FLNA	0.46305			MGP	1.05345
TYROBP	0.983989			PTRF	0.384498	V		WASF1	0.462849			CDCA5	1.05023
ADAM12	0.97859	V		CDH11	0.384277	V		SPARC	0.461259	V		LUM	1.04596	V
OLFML3	0.975748			KAL1	0.382193			ACTA2	0.46018	V		C1QA	1.04329
C1S	0.969944	V		PMP22	0.381294	V		BCL2A1	0.460173			DMN	1.03922
NINJ2	0.966158			ADAMTS5	0.377659			TNC	0.459321			CCDC109B	1.03914
SPARC	0.960772	V		FOSB	0.377103			ARMCX1	0.454913			SFRP2	1.03781
CXCL11	0.956291			PNOC	0.3771			TIMP2	0.454901			MT1X	1.03473
CDH11	0.953052	V		BBOX1	0.375892			CCL8	0.454805			SULF1	1.03364	V
COMP	0.943137			SLC39A4	0.37186			TM4SF1	0.454744			PLEKHO1	1.02654
LEPREL1	0.93806			DPYSL3	0.365856	V		CYBRD1	0.454595			LMCD1	1.0265
ECM2	0.936625	V		GREM1	0.360535	V		PPBP	0.454018			TPM2	1.0252
TGFBI	0.933998			C3	0.355406			DSE	0.45101	V		TPM1	1.02358
PSMB9	0.933091			FN1	0.353556	V		TMEM45A	0.450965			MMP3	1.02189
TMEM204	0.932935			PRRG1	0.352697			RSAD2	0.450226			BIN1	1.01709
