# Supplementary material for: Biomolecular Events in Cancer Revealed by Attractor Metagenes
Source: PLoS Comput Biol. 2013 Feb 21;9(2):e1002920. doi: 10.1371/journal.pcbi.1002920 (PMC3581797; doi:10.1371/journal.pcbi.1002920)
Supplement: Table S5 — Common clusters from the six datasets using k-means. (XLS) [file pcbi.1002920.s005.xls]

## Sheet: Sheet1
1	ID3	6
brca.gse2034	GYPA	GRM7	OPRM1	ADAM18	SERPINB13	FCAR	SLCO1A2	GNRHR	MLANA	GPX5	TRPC3	DMC1	HECW1	PSG1	LPAL2	COL4A3	CNGB3	CALB1	MYOZ2	LECT2	GRM5	KCNJ13	MIA2	CYP3A43	OR2J2	STATH	GPLD1	KRTAP4-7	MYH8	HRH4	ADRA1A	IL17A	GABRA3	LOC100652931	IFNA5	KIAA1456	ABCB11	EDDM3A	SULT2A1	ADCY10	KRTAP2-4	SLITRK3	HTR2C	ALDOB	SPTA1	IL4	MTTP	TBR1	ELAVL2
brca.tcga	GDA	PSAT1	SERPINA7	PASD1	TRIML2	ASGR2	RGS20	PRODH2	RHAG	DCT	HEMGN	CXCL1	MYL4	GDF3	TRIM15	CXCL3	ABCG5	CR1L	GAL	DPPA4	IGF2BP3	SLC12A3	ICAM5	TM4SF5	TYR	ASGR1	SIX6	SH3GL3	CAMKV	HKDC1	DNER	F2	TDGF1	RLBP1	NPPB	CDCA7	PRAMEF8	SLC6A14	FTCD	PTX3	CPS1	MPP6	NR0B2	SLC13A5	PLA2G12B	APOC3	ADTRP	ADH4	OCA2
coad.gse14333	MYOZ3	FGF14	TP63	SVEP1	ADRB3	AKAP6	ASXL3	ST3GAL3	SCN2B	LOC100507226	NRG2	LOC100287558	GLYAT	NCR1	CLRN1	CASR	HTR3A	DSCAM	RNF17	C9orf53	LOC283403	CRHR2	GFRA4	ATP2B2	NOS1	LOC100506430	CACNB4	LOC100506113	RGS22	LOC149373	KCNJ1	FGF5	CNGB3	LOC100507194	FAM123A	ATP13A4	RMST	GML	SLC6A13	LOC254559	LINC00052	SLC5A7	SPAM1	SLC22A16	SERPINB10	PURG	GRID1	CDH10	TYR
coad.tcga	TYR	PVALB	PASD1	SPANXD	DSCAM	ASGR2	MLANA	CA5A	HPR	GFRA1	HEMGN	FGG	RHAG	TF	CGA	AFP	FGA	TRIML2	ALB	APOC3	STAR	NR0B1	CTCFL	GDF3	ITIH2	DCT	GATA3	NPTX1	APOA2	F2	ITIH3	SPTA1	EEF1A2	PEG3	BEX1	CA14	HOXC13	MAGEC2	GREB1	ADAM23	CPB2	MAGEA10	PLP1	DPPA4	SALL2	ZIC3	ZMAT4	RHBG	DSCR8
ov.gse9891	DSCAM	C10orf90	ASB10	SLC8A3	C4orf17	OR2H1	HEATR7B2	KIAA1045	PAX3	PKLR	SLC28A1	FGF5	SLC45A2	C20orf152	LOC283089	CRX	SYT9	GLYAT	TCL6	TRIM10	FAM71B	LOC150197	GPR182	SV2B	LOC339822	LINC00589	LOC541473	LOC257358	LOC284648	LOC400794	GNN	FRMPD4	C9orf96	CCDC70	BSND	VWA5B1	PCDHGC4	LCN6	CIRBP-AS1	LPAL2	RBFOX3	TMEM174	FLJ35946	CNGB3	GTSF1L	NRAP	RHAG	CXorf27	ADAD1
ov.tcga	ADRA1A	ASCL1	LRTM1	SERPINB13	RUNX2	SARDH	OPRM1	RREB1	FCAR	CRISP1	KCNH6	HTR4	NCR1	FETUB	TBX1	KCNJ3	CALCR	NPAS1	GHRHR	CDHR5	GH2	RDH8	THPO	EDDM3A	KCND3	PDX1	CAMK2A	ABCB11	RS1	FGF5	SLC22A7	CSHL1	PAX3	GABRA5	SIGLEC8	PPP1R2P9	TP63	TBX5	EMX1	PSG1	SLC45A2	TCL6	NOVA2	C16orf3	JAK3	DOT1L	CXCR5	PVRL1	KCNJ9
Top genes:	RHAG:4	CNGB3:3	TYR:3	DSCAM:3	FGF5:3	OPRM1:2	SERPINB13:2	FCAR:2	MLANA:2	PSG1:2	LPAL2:2	ADRA1A:2	ABCB11:2	EDDM3A:2	SPTA1:2	PASD1:2	TRIML2:2	ASGR2:2	DCT:2	HEMGN:2
2	ID5	6
brca.gse2034	DAD1	ACTR10	MMADHC	CNIH	NPTN	PSMA3	SEC11A	LSM3	SPCS1	PTGES3	NOP10	LEPROT	SRSF9	NDUFAB1	PSMD6	ATP6V0E1	DYNLL1	PRDX3	NDUFC1	PPA2	C11orf58	GABARAPL2	NDUFB3	NEDD8	DHX15	KLHDC2	MATR3	MDH1	NDUFV2	COX7B	RNH1	ARF4	HNRNPM	C14orf166	ATP5B	ARCN1	DYNC1I2	NDUFB5	TRMT112	GHITM	CTNNA1	NGRN	SUCLG1	RAP1B	ATP5G3	HBXIP	NSA2	BTF3	PSMA1
brca.tcga	HTRA1	ABCA6	RUNX1T1	OGN	OLFML1	PODN	DCN	IGF1	LAMP5	LHFP	CXCL12	GLT8D2	HTR2B	MS4A2	SFRP2	LTBP2	ITGBL1	IGFBP7	CFHR3	WISP1	ABCA9	CCDC80	PDGFD	MYCT1	TSHZ3	OLFML3	PTPRB	TCEAL7	C1QTNF7	CFH	LUM	SPARC	SLC40A1	SORCS2	TMEM119	PCSK5	FAP	EBF3	KIAA0247	TLL1	COL1A2	COL6A3	RFTN2	THBS4	PLSCR4	GGT5	OLFML2B	TSHZ2	CRISPLD2
coad.gse14333	SRSF9	OAZ1	ZNF207	CCT2	COPZ1	TWF1	HNRNPM	RAB1A	HNRNPR	ARPC3	PDIA6	BZW1	SRSF2	HNRNPC	GHITM	MRPL13	TMED2	CCT7	MRPL32	SERP1	RPN1	CCNC	VPS26A	SSBP1	PRR13	ACP1	PPP1CA	C5orf43	XPO1	PTBP1	GORASP2	FAM96A	PSMC6	PDCD10	DIABLO	BUB3	CAPZA1	HBXIP	SFT2D1	SRSF7	EIF3M	RAP1B	VIMP	VPS29	YME1L1	SEP15	UBE2D3	ARCN1	RPF1
coad.tcga	OLFML1	ITM2B	CALM2	LTC4S	MARCH2	OR6V1	FAM176B	SPIB	HVCN1	NCR3	PLEKHA3	PLA2G4D	INMT	GPR119	GPSM3	TNFSF12	YPEL5	MEFV	TMEM59	PRAM1	DPEP2	BHLHA15	OR11A1	CDK5R2	C18orf12	ASB2	OR11L1	PLA2G5	ARL6IP5	PTPLAD2	C1QTNF7	SSPN	CTSC	TMBIM4	DCN	CFHR3	CHRNE	GLIPR2	CEACAM4	OR5V1	OR51I2	LITAF	CFH	FOXD3	SASH3	OR1E2	NYX	TLR1	STX12
ov.gse9891	ARPC1B	CYBA	MSN	PGK1	DTX3L	IFI27	LAMTOR1	GPX1	ACTR3	ASS1	PPP1CA	DHCR24	S100A16	PFN1	VAMP8	COX8A	CFB	GUK1	PSME2	IFI30	COX7B	SRGN	TAGLN2	LAP3	COX5A	ARPC3	NDUFV1	PKM	TMX2	MX1	COL6A3	ATP5J2	TM4SF1	GPNMB	CYC1	PSME1	HLA-DPA1	LY6E	ISG15	CRIP1	CTSB	DCN	COL1A1	PEA15	CAP1	NDUFA1	UQCRQ	CD74	MT2A
ov.tcga	RHOA	SLC25A5	SPCS1	NDUFAB1	HSPA8	CCT4	DAD1	MMADHC	OAZ1	ARPC5	SKP1	MDH1	PTGES3	PRDX4	PSMA1	ATP5B	ARF4	ATP5F1	JTB	UQCRFS1	DYNLL1	SUCLG1	PRDX1	PSMB4	CKS1B	NDUFB5	GDI2	PSMA6	RAN	COX7A2L	UBE2E1	TMEM59	CNBP	PRDX3	PSME1	HIGD1A	MDH2	POMP	SEP15	MGST3	MIF	GPX1	C11orf10	CLIC1	SNX3	SPCS2	NCOA4	TMBIM6	PFN1
Top genes:	DCN:3	DAD1:2	MMADHC:2	SPCS1:2	PTGES3:2	SRSF9:2	NDUFAB1:2	DYNLL1:2	PRDX3:2	MDH1:2	COX7B:2	ARF4:2	HNRNPM:2	ATP5B:2	ARCN1:2	NDUFB5:2	GHITM:2	SUCLG1:2	RAP1B:2	HBXIP:2
3	ID2	6
brca.gse2034	WDR61	PSMD10	MAEA	GORASP2	PPP2CA	GMPR2	CETN2	WRB	DPP8	MTX2	PIGP	LAMTOR3	UNC50	TRAPPC4	RAB1A	UQCRC2	GOLGA5	GTF2A2	DDX46	NFE2L2	COPS4	SRP54	MORF4L1	TXNDC9	TDP2	DLD	RPF1	MRPS28	RARS	METTL5	RPL26L1	MYOF	CNPY2	UBE2N	ADNP	NDUFS4	DCTN6	TAF9	ZNHIT3	TMEM14B	ETF1	TMEM126B	RAB11A	SRSF3	MCTS1	PSMC6	MFAP1	EAPP	TMEM14A
brca.tcga	TRIP12	ATP6V0D1	TERF2	CTAGE1	IL10RB	TMEM214	GNAI2	ELMO2	NRBP1	ADCK1	SNX17	NOMO1	C22orf25	MTCH1	ZNF346	SEC23B	ARAF	RBM23	GMPPA	NEK9	RAB7A	DBNL	RAB1B	N4BP1	TRAFD1	IFT52	CAPN1	ZNF804A	KIAA1462	HEXB	RAB4B	GNB1	TMEM110	SNAP23	ZFAND3	CERCAM	CHPF	RHOA	MAPK9	CNP	CAPNS1	TSPAN17	PITPNA	SCN1B	FOXN1	CTSA	ALAS1	CHUK	VPS8
coad.gse14333	SRSF3	SFPQ	DENR	HNRNPF	LIN7C	GFM1	LSM4	PSMD13	ARF1	UBE2K	TIMM23	EIF4E2	DUSP11	USP1	CAND1	NUP37	VTA1	KPNA4	NUDT21	PPID	HAT1	TSN	RAB21	MRPL37	SELT	CHMP2B	TMEM41B	NAP1L4	SEC61A1	ANAPC5	PSMD12	IMMT	GOLT1B	PSMD2	NCBP2	NOP16	SCAF8	MAEA	WBP11	SDHB	ACLY	PPP6R3	FOPNL	HN1	SYNCRIP	CTCF	PAPOLA	WTAP	LONP2
coad.tcga	CRHR1	HCRTR1	RAB1B	C11orf42	OR1L6	OR4D10	UGP2	DHH	RTN4RL2	ADRB3	OR4X2	OR2B11	OPN4	ANKRD33	OR1K1	KLHDC7A	GFRA3	CGRRF1	SLC6A5	PNPLA5	LMAN1L	FTMT	FOXH1	TAAR5	GPX5	OR10A5	TANK	ASTL	CD300LG	S1PR2	HBP1	AKTIP	SNX6	CHRM1	SH3GL1	UBE2F	OR5A1	TAAR2	PEX19	DUSP11	SLC35A5	LINC00483	OSTN	UBE2J1	C14orf142	LTB4R2	OR2B2	NECAP2	YIPF2
ov.gse9891	C1R	PLSCR1	CTSL1	NNMT	C1S	GBP1	H2AFY	TYROBP	GYG1	SERPINF1	CD14	NMI	ARHGDIB	C1QC	MUC1	LAPTM5	RAB31	RAB7A	TRIM22	CP	IFI16	SPPL2A	CAPZA2	C1QA	SH3GLB1	FAM96A	IQGAP1	MYH9	CHI3L1	RBX1	UBE2Q2	TNFRSF1A	COL5A2	MAFB	TMEM50A	CHMP5	ETF1	WDR1	FN1	PLOD2	PARP14	ACVR1	CAPZB	UBE2E2	RAP1A	MVP	MYD88	DERL1	LGMN
ov.tcga	NAGK	POLE3	ATP6V0D1	PSMD1	UBE2V2	SRP72	UBE2A	COPS3	MAPRE1	RAB7A	RPF1	C1D	SH3GLB1	TMCO1	GLRX3	POLR2E	ETF1	VAMP3	SNX17	IMMT	SDHB	HNRNPM	UNC50	RNF114	MOB4	PCMT1	C2orf47	ITFG1	TMX2	C12orf44	MLH1	MRPL13	RAB9A	ARMC1	PLEKHB2	NUP37	CD46	CAPZA2	MCTS1	BRP44	ATF1	SLC35B1	WDR61	UBXN4	COPS4	MFAP1	PDIA6	UBE2G1	AMD1
Top genes:	ETF1:3	RAB7A:3	WDR61:2	MAEA:2	UNC50:2	COPS4:2	RPF1:2	SRSF3:2	MCTS1:2	MFAP1:2	ATP6V0D1:2	SNX17:2	RAB1B:2	DUSP11:2	NUP37:2	SELT:2	IMMT:2	SDHB:2	PLEKHB2:2	CAPZA2:2
4	ID32	5
brca.gse2034	null
brca.tcga	TENC1	NOSTRIN	MVP	MLPH	FOXP1	MAN2B2	CTDSP1	REEP6	ABAT	PLAC9	CIRBP	ITGB5	PLD4	IGFBP4	LRP10	PRICKLE2	NTN4	FYCO1	ITM2B	LAMB2	KIF13B	LIMA1	HNMT	C4orf34	CCDC170	LPAR6	KERA	CRY2	SCN2B	DOK1	WFS1	TMBIM4	SEPT8	IL6ST	GALNT10	RNASEL	CHST15	NUDT18	CHRNA6	FAM214A	CLEC3B	ANXA9	ALAD	LDB2	INPP4B	CISH	CHRD	USHBP1	SUOX
coad.gse14333	CTNS	BPGM	SNX18	TCN2	MEF2A	BAD	ZFYVE1	TLE3	EMILIN1	MAP3K3	ADCY7	GGT5	NLRX1	RELB	EOGT	DOCK4	KBTBD4	PIAS3	SRGAP2	STK17A	PANK4	DCAF5	CD276	FSTL3	ROGDI	TFE3	TMEM140	PIN1	KLHL20	ITPKB	YIF1B	RIN3	MTERFD2	DCBLD1	NACC2	PLXDC2	RGS10	GPX8	GJA4	ZFYVE26	LACTB	STIM1	WDR47	ELTD1	CHST14	THAP8	RELL1	TRAF3	SIK3
coad.tcga	CSGALNACT2	CD180	CXCL12	RHOJ	UVRAG	MRAS	ETS1	TIE1	SH2D3C	MMP2	ARHGAP30	PZP	ELK3	GRB2	DOCK4	PPP4R1	ATG13	FICD	CNNM2	ABCA1	TM9SF1	TLN1	DNAJC14	CALD1	RAB2B	RHOQ	ATP10A	SNX18	MDGA1	NEK9	CALHM2	ACP2	PCNX	VCAN	MSC	EXOC5	PHF21A	COL14A1	TRIP12	UBTF	CHRAC1	BRMS1L	ZFYVE26	FAM20A	DCAF11	PLEKHO1	SON	ARL13B	NNMT
ov.gse9891	TGFB1I1	ITGA5	SPSB1	SH2B3	C5AR1	EMILIN1	TGFB1	NEK6	MIR22HG	OSMR	CD93	LHFP	SEC24D	TNFRSF1B	OLFML2B	GPR107	HRAS	PLAUR	NRBF2	SPHK1	IFFO1	RASSF2	NAGA	COLEC12	B3GAT3	GJB2	ECM1	TYMP	GOLGA1	FBN1	CERCAM	FKBP15	EAF1	ALDH1A3	PDGFB	SRPX	SEPN1	CSGALNACT2	THBS1	SNX30	SFXN3	CNRIP1	RCN3	EGR2	ANTXR1	AKNA	HCK	C5orf62	HMOX1
ov.tcga	PI4K2A	TGFB1	KLC2	ABR	VSIG10	GALNT10	GIT2	SP2	ZZEF1	GOLGA1	SLC36A1	ENTPD1	TBC1D12	ANKRD40	KIF16B	C9orf91	UHRF1BP1L	AMBRA1	C9orf40	ZKSCAN5	KLHL20	ORAI2	MED22	MAPK7	GNA12	SEPT6	ENG	KDR	C10orf88	CSF2RB	MAPRE2	HIVEP3	RASA2	ARHGEF9	STK10	RNF216	EPN2	RANBP10	PHTF1	NLK	BLZF1	SPHK1	NCLN	GNE	CWC25	NCBP1	EZH1	SIKE1	IFFO1
Top genes:	GALNT10:2	SNX18:2	EMILIN1:2	DOCK4:2	KLHL20:2	ZFYVE26:2	CSGALNACT2:2	TGFB1:2	SPHK1:2	IFFO1:2	GOLGA1:2	TENC1:1	NOSTRIN:1	MVP:1	MLPH:1	FOXP1:1	MAN2B2:1	CTDSP1:1	REEP6:1	ABAT:1
5	ID13	5
brca.gse2034	AFF2	GLP1R	OR7C2	NCR1	CER1	CPA2	BCAN	GYPB	DCHS2	CHRNA3	SLC17A4	PLAC4	ATP2B2	SFTPB	PMFBP1	HTR4	APOL5	PDE1C	HIF3A	ATP12A	GRIN1	B3GAT1	ADAMTS12	PDHA2	EDA2R	SLC17A3	ASCL3	HTR3A	DRD2	DSCR4	CRB1	DSCAM	MYO15A	SLC12A3	CST8	TMEM151B	PAX8	KRT2	GRM2	SCN10A	NPY6R	HRH3	DGCR9	CADM3	FGF23	HBE1	GPR12	KRT9	OMG
brca.tcga	null
coad.gse14333	CXorf36	EPHA8	SYNGR1	ADD2	CLIP3	NFATC4	NKX3-1	PRPH2	MAP6	VIPR2	NLGN3	CD33	SGSM1	TTYH2	MYCNOS	ITGAD	RPL3L	PKNOX2	FNDC5	LOC100506105	NFATC1	SNED1	CD209	KLK4	MEI1	SIGLEC7	ASCL3	FBLN7	WDR93	MIR497HG	CDSN	TAL2	ARHGEF15	C1QL1	PLAC4	RASL10A	NTRK3	SEZ6L	C12orf39	SYPL2	VSTM4	ANKRD33B	CAMK2B	GJD3	FOXN1	C16orf89	AMHR2	C9orf96	DNAJC5G
coad.tcga	OSMR	CPEB1	PTH1R	ZIK1	DSEL	PDE2A	NUDT10	NECAB1	AMOTL1	NEFM	PKNOX2	DCLK1	CHST8	LINGO2	PGR	SHC4	SORCS1	CDO1	EXTL1	ADD2	SRSF12	RGS22	TMEFF2	POPDC3	PRAMEF8	SUSD4	TNNI2	RGS17	SLC35F4	PCDHB5	NAP1L2	POU3F2	ARPP21	SYNGR1	CNTNAP3	EPO	SERPINA11	LINC00478	RORB	SOX5	C1orf64	RBPMS2	JPH3	SGCG	CYP19A1	ZNF667	SLC6A15	NUP210L	NUDT11
ov.gse9891	EPHA8	LOC100144597	HTR4	TAL2	LOC100129129	GLP1R	GRIN1	FAM186B	LOC149773	CASR	BCAN	TP73	SLC1A7	CCDC13	MGC50722	SLC22A8	ANKRD53	LOC100128292	SMOC1	NLGN3	CACNG5	SUN5	FLJ42875	CTRC	NTRK3	PLAC4	SMCP	TTLL10	BPIFA3	GPRC5D	C1orf94	LOC100507584	MAPK11	CACNG8	PVRL1	CACNB1	GPR52	RHO	ADIG	MASP1	WNT3	VWA5B2	C2orf16	FBXL19-AS1	HCG22	WDR93	CD300LG	FAM171A2	UCN3
ov.tcga	RAMP2	SFTPC	GLP1R	RHBG	PDE1C	NOX1	PDE3B	ETS1	BMP8A	C4BPB	PAPPA2	CNTFR	GYPB	LDB3	ACF	NEUROD4	CYP3A4	ADRB3	APOL5	NKX3-1	GRPR	PLAC4	ALOXE3	SEMA6B	TAT	GSN-AS1	DRD2	SLC6A2	FGF2	ABCB8	TRIM10	APOBEC2	CACNA1D	APAF1	GJA9	HAP1	CACNB1	HOXC8	KCNN1	CHRNB2	SCN10A	MIER2	SLCO5A1	SLC22A2	PRODH	CGA	CER1	ADAM23	BCAN
Top genes:	PLAC4:4	GLP1R:3	BCAN:3	CER1:2	GYPB:2	HTR4:2	APOL5:2	PDE1C:2	GRIN1:2	ASCL3:2	DRD2:2	SCN10A:2	EPHA8:2	SYNGR1:2	ADD2:2	NKX3-1:2	NLGN3:2	PKNOX2:2	WDR93:2	TAL2:2
6	ID1	4
brca.gse2034	TRIM10	MTMR8	RUNX2	IL5RA	NOX1	TCL6	FGF5	HNF4A	PKLR	GPR182	KCNJ1	ITGB3	CALCA	CRHR2	MATN1	CLDN18	LRTM1	LOC730227	SLC6A6	HPCAL4	PAX4	DCT	MPO	DLGAP2	CDRT1	LDB3	NR6A1	LOC100505933	CRP	EDA	ACRV1	AGTR2	PRO1768	GRM1	EPHB1	SPAM1	MPL	UPK2	PAX3	CABP5	SCAND2	GHRHR	TTC22	HPSE2	HRG	TKTL1	FOXA2	CLEC1B	TACR1
brca.tcga	null
coad.gse14333	OPRM1	GABRA1	ST8SIA3	C9orf135	GYPA	C10orf90	GRM7	NETO1	SLC6A15	GAD2	GFAP	PEX5L	PWRN2	C3orf30	OFCC1	FNDC9	CXorf41	KRTAP2-2	C11orf42	JPH3	GALP	LOC100505963	DKFZP434H168	LOC338579	DNAH6	MPL	SLC1A2	CRISP1	CALN1	CDH8	LOC100506122	SCGB1D2	LOC100505518	LOC100128840	B3GALT1	CCDC79	MOBP	ATXN3L	HOXD3	GABRG2	LOC100506089	RND2	FLJ32955	DPPA5	GPR135	LAMB4	ATPAF1-AS1	DLGAP2	LOC219731
coad.tcga	HEG1	PKD2	GPC6	PIK3CD	AFAP1L1	HLX	MEIS1	EVC2	NRP2	A2M	EBF1	RASSF5	ODZ4	KLHL5	PTRF	BVES	DDR2	TMEM26	DZIP1L	LAMB2	TTYH2	AEBP1	ARHGEF17	SCAND2	RFTN1	NRP1	MAP7D1	ITGB3	CCR1	MAP1A	CCBE1	MAP3K12	LRRC8C	SLC23A2	ZDHHC18	PCDH7	KLC1	SYNE1	TRPC3	C1orf216	MMP14	FLI1	PRRX1	SDK1	INPP4A	PALMD	DGKI	COL13A1	ZNF281
ov.gse9891	ABCB5	ASB4	LOC100652824	ABCC13	LOC100506122	PBOV1	ADRA1A	IL28A	OPRM1	LOC100506733	MYL1	LOC285740	OR1A2	MOBP	LOC100507228	OFCC1	SRY	SPAM1	CPN2	VSX1	NKAIN3	C16orf78	LINC00301	C7orf69	LMX1A	LSAMP-AS3	LOC440896	LRTM1	CYLC1	GYPA	SOGA3	TGM4	CYP2C18	MUSK	C10orf96	LOC100287813	CIB4	LOC400548	OR1A1	FAM205B	FEZF2	CHRM5	AWAT1	C12orf54	GH2	LINC00486	SERPINC1	ARHGEF38	SLC6A4
ov.tcga	null
Top genes:	ITGB3:2	LRTM1:2	DLGAP2:2	SPAM1:2	MPL:2	SCAND2:2	OPRM1:2	GYPA:2	OFCC1:2	LOC100506122:2	MOBP:2	C16orf78:2	TRIM10:1	MTMR8:1	RUNX2:1	IL5RA:1	NOX1:1	TCL6:1	FGF5:1	HNF4A:1
7	ID4	4
brca.gse2034	null
brca.tcga	GIMAP6	SERPING1	FGL2	GIMAP4	CTSK	DPT	WDFY4	ECM2	HLA-DRA	HLA-DPA1	GIMAP1	SPARCL1	LST1	HLA-DMB	F13A1	GPR65	GAPT	LRRC32	COL3A1	SFRP4	KLRB1	GIMAP8	C1orf162	C1S	MNDA	LAMA2	IGSF6	HLA-DMA	TNFAIP8L2	MPEG1	HLA-DPB1	SPON1	CD74	NLRC4	CCR5	CILP	RGS18	OMD	CRTAM	SLCO2B1	MMRN2	GGTA1P	GZMK	ELTD1	GIMAP7	AOAH	CDH11	MXRA5	CD93
coad.gse14333	null
coad.tcga	HPGDS	CD27	P2RY14	C1orf210	MS4A7	GPR183	STAB1	GIMAP6	PLVAP	TNFAIP8L2	C1QB	FCER1A	ACVRL1	CCL19	LST1	HCK	SLAMF1	MPEG1	FAM30A	TIGIT	TNFRSF4	MS4A6A	TLR8	TPSAB1	GPR65	CLDN5	GPR171	ABP1	AMICA1	TCF21	GPR18	LRRC25	MFSD7	PTGDS	NLRC4	FPR3	HDC	EDIL3	SPARCL1	BCL2L15	RGS18	ELTD1	F13A1	SELP	LMOD1	GZMK	CCR5	SLAMF8	GJA4
ov.gse9891	NID1	ANGPTL2	GPR124	SLC16A3	CLIP2	SMTN	MRGPRF	GFPT2	RECK	GEM	TMEM204	RCAN2	HEPH	HLX	DCHS1	LEPREL2	TOM1	ELTD1	FZD1	SRPX2	TMEM158	FMO1	PLA2G15	F2R	TTC7B	OLFML1	KCTD11	HOMER3	MYO1E	SMPDL3A	FAM219A	SGPP1	FNDC1	GALNT10	UPP1	CHST11	DACT1	GPR116	MICAL1	NACC2	SOAT1	MMP19	SHANK3	KLHL22	TDO2	RAPGEF1	LRIG3	LIMA1	KDELC1
ov.tcga	RPS6KA4	CDK12	MUL1	CDK9	SPAG9	OCRL	TRAF6	FKBP15	SCYL2	TRAFD1	MAP4K5	OSTM1	GOSR2	ATG7	C6orf106	IQSEC1	RANGAP1	ATP10D	DBR1	NKIRAS2	FAM190B	ANAPC2	AKIP1	DNAJB12	SPATA2	IKBKG	SENP3	SMG1	ZNF200	AGGF1	ATP6V0A1	CEP135	FBXO42	ADAT1	TRIM68	PLEKHA2	CHUK	DNAJC9	KLHL18	RPS6KB1	SOAT1	IL17RA	NUMB	C9orf156	RNF31	KPNA4	ARRB2	REXO4	MAPKAPK2
Top genes:	ELTD1:3	GIMAP6:2	SPARCL1:2	LST1:2	F13A1:2	GPR65:2	TNFAIP8L2:2	MPEG1:2	NLRC4:2	CCR5:2	RGS18:2	GZMK:2	TMEM204:2	SOAT1:2	SERPING1:1	FGL2:1	GIMAP4:1	CTSK:1	DPT:1	WDFY4:1
8	ID0	4
brca.gse2034	RPL10A	RPL11	RPS9	RPS5	RPLP0	HSPA8	RPL6	PFDN5	RPL35	RPS11	RPL35A	EEF1B2	RHOA	RPS3A	RPS16	RPL15	POSTN	IGFBP7	GNB2L1	RPS25	RPL3	RPS15A	RPS12	RPS8	RPS3	RPL4	RPL29	RPS27	COL3A1	RPL18A	RPS14	VIM	SLC25A6	RPL9	RPL13A	RPL27A	LGALS1	SLC25A3	MYL6	RPS6	RPS19	COL6A3	RPS27A	LGALS3	EEF1G	RPL36	SRP14	RPS13	RPS23
brca.tcga	null
coad.gse14333	RPLP0	RAN	MMADHC	RPL24	RPS9	RPS16	PSMB1	MRPL3	SNRPG	PTGES3	RPS7	RPS2	TXN	HNRNPK	NDUFAB1	RPLP1	PSMA1	DYNLL1	RPL18A	CHCHD2	SF3B14	CCT8	RPS3A	USMG5	CLIC1	RPS3	PRDX1	HSPA8	SRP9	FAU	RPS24	HNRNPA1	GDI2	COPB1	RPS11	UBA52	RPL10A	HSPD1	CCT4	EEF1B2	SLC25A5	ACTR3	RPLP2	RPL7	RPS13	RPL11	CCDC72	COX5B	GNG5
coad.tcga	null
ov.gse9891	RPS9	RPL29	RPL13A	RPL3	GNB2L1	C3	EEF2	RPS8	EEF1D	FAU	RPL15	NPM1	RPL14	EEF1B2	SLC25A6	EIF3E	RPS14	RPL8	RPL4	RPS2	EEF1G	RPL18A	GAS5	IFITM2	EEF1A1	RPL35	EIF3H	TOMM7	RPL7A	RPS15	RPLP0	RPS3	TIMP1	RPL32	RPL10A	RPLP1	RPS6	RPS13	RPS5	RPL5	RPS4X	RPL24	IFITM1	FTH1	RPS25	RPLP2	EIF3L	S100A6	RPL11
ov.tcga	RPS9	RPS3A	RPS27A	RPS27	EEF1G	EEF1A1	RPL18A	RPL10A	RPS13	RPLP0	RPL13A	RPS23	RPS14	RPL21	RPS15A	RPL29	RPL30	RPL12	RPS4X	RPL9	RPL39	RPL10	RPS5	RPS29	RPS15	RPS7	RPL36A	RPL8	NACA	RPL7A	RPL3	RPL24	RPL15	RPL18	FAU	TPT1	RPS24	RPLP1	RPS17	RPS2	GNB2L1	RPS6	RPL35	PPIA	RPL35A	UBA52	RPL13	RPS3	RPL5
Top genes:	RPL10A:4	RPS9:4	RPLP0:4	RPS3:4	RPL18A:4	RPS13:4	RPL11:3	RPS5:3	RPL35:3	EEF1B2:3	RPS3A:3	RPL15:3	GNB2L1:3	RPL3:3	RPL29:3	RPS14:3	RPL13A:3	RPS6:3	EEF1G:3	RPL24:3
9	ID7	4
brca.gse2034	null
brca.tcga	CENPN	MTHFD1L	SRSF12	CENPW	CDC20	CENPA	BUB1	BCL11A	PPP1R14C	LEMD1	TTK	BLM	MCM10	FANCA	CCNE1	KIF2C	CDCA8	DLGAP5	C15orf42	NDC80	CCNB2	MELK	FOXM1	CHEK1	HJURP	YBX1	STAC	ART3	CCNA2	ANLN	PIF1	DEPDC1	EXO1	FAM126A	LDHB	LANCL3	CEP55	RAD54L	CCDC82	TPX2	FZD9	ARNTL2	SKA1	FAM64A	KIF14	ASPM	FAM54A	PTTG1	LBR
coad.gse14333	RBM15	DDX23	NAA50	HNRNPU	SART3	EMC8	HNRPLL	DHX9	ILF3	C8orf76	ALG3	CMAS	RBM12	AP3D1	DBR1	OGFOD1	DYNC1LI1	YRDC	NUP98	MTO1	RNF34	PAK2	ZNF143	MRPS16	DBF4	LLPH	MRPL44	KIAA0100	WAPAL	PDE12	DCK	CLPP	TRA2B	FTSJD1	POLD2	MCMBP	LSM12	FUBP1	DHX36	TMEM33	KCTD5	SMC4	HSPA4	ZDHHC5	SLC30A5	FARSA	C3orf37	TRUB2	UTP6
coad.tcga	null
ov.gse9891	SCYL1	COBRA1	SAC3D1	C11orf24	MAP7D1	TMEM184B	MED15	C17orf62	PPP1R18	MSANTD3	MAN2B2	TLN1	MAN1B1	TOR1B	TACC3	TBC1D10B	DCK	FBXW5	PMM2	CASP3	TCIRG1	METTL11A	RAP2C	COL15A1	ANLN	TNIP2	USP38	SPNS1	HERC5	ARL8A	PLXND1	BNIP2	TDRD7	FOXM1	SNAI2	CDCA5	PLAU	ACP2	VASN	NTAN1	SLC44A1	SCO2	ELF4	INPPL1	RHBDF2	C1orf38	PLEKHO2	BCKDK	C9orf78
ov.tcga	CPSF6	METTL13	NAA35	OSBP	DDX23	MEN1	RPAP3	FUBP3	ISG20L2	ZFR	SLC35E1	MTO1	SLC4A1AP	MFSD5	GOSR1	RPS6KC1	RBM12	FBXW2	GPATCH8	OSBPL11	INTS12	UBAP2L	MAP7D1	UBA5	VPS8	CREB1	TRAM2	GAPVD1	AIDA	RNF14	WAPAL	RANBP2	ZNHIT6	NAPA	TOR1B	C20orf4	FLAD1	TTC13	TUBG1	RANBP9	FAM20B	AP1G1	HTATSF1	AP2B1	TAF6	HIPK1	NEK4	RCOR1	DHX9
Top genes:	FOXM1:2	ANLN:2	DDX23:2	DHX9:2	RBM12:2	MTO1:2	WAPAL:2	DCK:2	CPSF6:2	MAP7D1:2	TOR1B:2	CENPN:1	MTHFD1L:1	SRSF12:1	CENPW:1	CDC20:1	CENPA:1	BUB1:1	BCL11A:1	PPP1R14C:1
10	ID26	4
brca.gse2034	KLF11	MAP1S	MAP4K4	SLC9A6	RBM28	DCPS	CSNK1E	YEATS2	TRMT11	ANKS1A	SLC31A1	ATAD2B	EHBP1	APBA3	CEBPG	CSNK2A2	ELF4	MIS18A	EHD1	CHIC2	SAC3D1	RASIP1	RBMX2	LMO4	PELI1	HSPBAP1	MAFF	TMSB15B	NUDT1	NCAPD3	THOC6	DGCR8	TBPL1	RNASEH1	MDC1	ATR	UTP14A	TAF11	CX3CL1	MCM5	CEP192	SFRP1	FZD7	HERC2	MICAL1	MECP2	CHST12	KCNN4	TEAD4
brca.tcga	MAML2	YEATS2	SUV39H2	RNASEH1	FAM171A1	PDSS1	PRKY	PLAGL1	NUP93	TUBB6	FOXC1	DDX26B	TLE4	UGT8	TTC7A	LPIN1	UBXN2A	TMCC2	ME2	ATP11A	BTG3	ARHGEF4	ADCY7	SH2D2A	TTLL4	SEL1L3	ACOT9	CORO1C	CDC123	PLD1	TTL	LIPG	NT5C2	CSRP2	SMC6	LOC641367	MAP4K4	COTL1	BCL2A1	SLC9A6	MSN	FABP5	C16orf80	C21orf91	GPSM2	TAF4B	ARSB	MAPRE2	INPP4A
coad.gse14333	null
coad.tcga	null
ov.gse9891	MAP2K1	DSE	CORO1C	POMP	TUBB6	AKT1	RGS19	VCAM1	THBS2	SELM	RECQL	SLC20A1	FEN1	ADM	RRM2	RBM38	TRIP4	CLP1	COL6A2	CD163	PISD	FADD	LRRC40	APOL1	SLC9A6	DPP3	DPYSL3	STX4	MESDC1	SNX4	P4HA2	SULF1	C14orf129	MELK	RAD23B	C1D	GRPEL1	UBQLN1	YWHAH	BHLHE40	ACAD9	C22orf13	UBL4A	COL5A1	CMPK2	MGAT1	BCL10	ZYX	ENOPH1
ov.tcga	ALG6	NSF	SRSF10	GNAI3	PPID	KIAA1279	PSMD11	CLP1	SCAMP3	SMG8	TOR1A	CHIC2	PRPSAP1	ABI1	DR1	USP39	PSMD12	AIMP1	SNRK	SRP54	SPTLC1	GTF3C3	GDE1	C1GALT1C1	PSMD7	WDR1	YIPF3	CIAPIN1	PNO1	KAT7	RALB	CDC23	TMX1	AGL	NUP205	GPN3	SNX2	CHMP2B	SNRNP27	C5orf22	SPOP	HDAC3	MARCH5	GNS	IL13RA1	TIMM23	KIFAP3	MAP1LC3B	TMED5
Top genes:	SLC9A6:3	MAP4K4:2	YEATS2:2	CHIC2:2	RNASEH1:2	TUBB6:2	CORO1C:2	CLP1:2	KLF11:1	MAP1S:1	RBM28:1	DCPS:1	CSNK1E:1	TRMT11:1	ANKS1A:1	SLC31A1:1	ATAD2B:1	EHBP1:1	APBA3:1	CEBPG:1
11	ID17	3
brca.gse2034	SSB	ERCC3	DGUOK	UBAC1	C16orf80	DPF2	QRICH1	NUP153	PLEKHB2	GTF3C3	RTCD1	NUP37	TMEM131	GTF2B	DDX18	PELO	PIK3R4	SEC24B	TCERG1	SART3	UBE3C	FBXO21	UBQLN2	TPRKB	PRKRA	C12orf44	ACVR1	MFSD5	MED17	ASNSD1	KIAA0947	STAG2	UBE2G1	PDLIM2	GLOD4	TSN	STK25	E2F6	NDEL1	LTN1	RAB22A	ZZZ3	BRD7	DUSP11	UPF2	BET1	LSM6	CTCF	ASCC3
brca.tcga	null
coad.gse14333	UPF1	DHX30	PPFIA1	PBRM1	KIAA1737	DDX19A	PRPF31	TXLNA	SUGP1	RPS6KB1	RTF1	C19orf52	EXOC8	NRBF2	REXO4	MARK3	ZNF317	CREB1	EWSR1	SLC35E1	SAFB	SART1	RIPK1	KATNA1	SMG1	TLK2	PDCD7	DNAJC14	CBLL1	ERCC3	CHERP	SPAST	MED17	ZFAND3	USP47	ZC3H7A	ABCF3	TMF1	RFC1	HIPK1	CCP110	MTF2	IREB2	TERF1	C6orf89	UBXN7	PEX13	RTCA	WHAMM
coad.tcga	null
ov.gse9891	null
ov.tcga	CDC27	GCC1	BECN1	KPNA1	RBM14	LARP4	PSME3	NRBF2	ATG13	ZNF143	USP15	VPS54	WDR47	TRIM32	SETX	PTPN1	DHX8	GORASP1	MIA3	ELMO2	HPS5	PRKD3	SLC35A3	PI4KA	RAP2C	TBC1D10B	SH2B3	LRIF1	IKBKAP	SWAP70	ZNF281	MKLN1	P2RX4	DOLK	KLF11	RFC1	CSTF1	ACO1	PLAA	ZC3H7A	NUP98	N4BP1	PDCL	MPDU1	SMC2	IP6K1	MOSPD2	ZDHHC3	QKI
Top genes:	ERCC3:2	MED17:2	NRBF2:2	ZC3H7A:2	RFC1:2	SSB:1	DGUOK:1	UBAC1:1	C16orf80:1	DPF2:1	QRICH1:1	NUP153:1	PLEKHB2:1	GTF3C3:1	RTCD1:1	NUP37:1	TMEM131:1	GTF2B:1	DDX18:1	PELO:1
12	ID10	2
brca.gse2034	null
brca.tcga	null
coad.gse14333	null
coad.tcga	ATP8B2	FGFR1	EFHA2	BACH2	MCC	PCDH9	LRCH2	PAPPA	CNTNAP1	BNC2	C20orf194	EHD2	NPR1	APBA2	CCDC8	ELOVL4	ZNF781	STK32B	CNRIP1	CORO6	TMCC2	HMCN1	ADAMTS3	FSTL1	FERMT2	LDOC1	ZFHX4	AKT3	LEPRE1	FBXL7	SYDE1	LZTS1	GAS7	NAP1L3	ITGA5	FEZ1	LOXL4	STAC	ZNF135	BEND6	NLGN4X	ARMCX1	SLC26A10	DOK5	EVC	ODZ3	POM121L8P	MEOX2	RGS4
ov.gse9891	ACVRL1	CYGB	JAK3	RGS3	CREB3L1	GGT5	SH2D3C	ESAM	ARSA	RAMP2	DAPK3	HEYL	TAOK2	TBXA2R	CNTNAP1	CDH5	FEZ1	MAP1A	ADORA2A	MDFI	SLC17A9	LMF1	KIF21B	LIMK1	SMPD1	LRRC33	TRPV2	NOTCH4	CDHR2	SLC39A3	TMPRSS2	FOSL1	PRSS36	TNFRSF4	NES	KCNMB1	LIMD2	IQSEC2	JAM3	SHISA4	PEAR1	FLYWCH1	GRK5	IFFO2	ECSCR	CAMK2N1	C19orf77	ACAP3	ZNF865
ov.tcga	null
Top genes:	CNTNAP1:2	FEZ1:2	ATP8B2:1	FGFR1:1	EFHA2:1	BACH2:1	MCC:1	PCDH9:1	LRCH2:1	PAPPA:1	BNC2:1	C20orf194:1	EHD2:1	NPR1:1	APBA2:1	CCDC8:1	ELOVL4:1	ZNF781:1	STK32B:1	CNRIP1:1
13	ID16	1
brca.gse2034	null
brca.tcga	null
coad.gse14333	null
coad.tcga	CLEC10A	GAPT	MMRN2	C5orf20	CTSO	VAMP8	CCL15	SCIMP	KCNMB1	GHRL	GPBAR1	CFP	FOLR2	C10orf54	HCST	DARC	CCL21	FGD2	MS4A2	ABI3	BHLHE22	CD79B	S1PR4	IL22RA2	FAM109B	CD300LF	BCMO1	DOK2	MMRN1	SLC46A3	FCN1	SLCO2A1	RFTN2	FCER1G	ZNF366	TFEC	FMO3	ABCC13	KCNK13	FIBIN	C3AR1	LYVE1	EGFLAM	DNAJC5B	LINC00324	SIRPG	HHLA2	B3GALT4	ACY3
ov.gse9891	null
ov.tcga	null
Top genes:	CLEC10A:1	GAPT:1	MMRN2:1	C5orf20:1	CTSO:1	VAMP8:1	CCL15:1	SCIMP:1	KCNMB1:1	GHRL:1	GPBAR1:1	CFP:1	FOLR2:1	C10orf54:1	HCST:1	DARC:1	CCL21:1	FGD2:1	MS4A2:1	ABI3:1
14	ID18	1
brca.gse2034	null
brca.tcga	null
coad.gse14333	null
coad.tcga	null
ov.gse9891	null
ov.tcga	PGK1	PSMD10	SRSF2	UGP2	SYPL1	MTCH2	SELT	PSMA3	RAB1A	PSMA5	ZNF207	PSMD6	PSMA2	HAT1	PSMC2	ATG3	LSM3	PDCD10	DHX15	RARS	ATP6V0B	DAZAP2	PCBP1	LAP3	CNIH	SDHC	NDUFS3	ETFA	SRSF3	SARS	UBE2D3	VPS26A	GABARAPL2	PPP2CA	DCTPP1	EMC3	HMGN4	TM9SF2	DLD	CHMP5	SF3B5	POLR2G	GBAS	RBX1	ARPC1A	DCTN3	MRPL33	STOML2	DBI
Top genes:	PGK1:1	PSMD10:1	SRSF2:1	UGP2:1	SYPL1:1	MTCH2:1	SELT:1	PSMA3:1	RAB1A:1	PSMA5:1	ZNF207:1	PSMD6:1	PSMA2:1	HAT1:1	PSMC2:1	ATG3:1	LSM3:1	PDCD10:1	DHX15:1	RARS:1
15	ID20	1
brca.gse2034	null
brca.tcga	null
coad.gse14333	null
coad.tcga	CEACAM7	CDH17	PPP1R14D	PLA2G10	CLRN3	LRRC19	ADAMDEC1	SGPP2	C1QC	NOX1	GPA33	CPA3	BTNL3	RIPK3	RNF186	CCL11	IGKV1-5	CLCA1	APOBEC1	SULT1B1	CBLC	ARL14	KCNE3	COX7A1	IGKC	SLC5A1	MEP1A	SDCBP2	TRIM31	MFSD6L	PARM1	FGL2	PIGR	LRRC31	MS4A8B	KLRB1	PI3	NAT2	FAM55D	CLIC5	GUCY2C	FAM55A	MUC13	FAM84A	ADH1C	USH1C	CSF1R	IGSF6	CDX2
ov.gse9891	null
ov.tcga	null
Top genes:	CEACAM7:1	CDH17:1	PPP1R14D:1	PLA2G10:1	CLRN3:1	LRRC19:1	ADAMDEC1:1	SGPP2:1	C1QC:1	NOX1:1	GPA33:1	CPA3:1	BTNL3:1	RIPK3:1	RNF186:1	CCL11:1	IGKV1-5:1	CLCA1:1	APOBEC1:1	SULT1B1:1
16	ID36	1
brca.gse2034	null
brca.tcga	null
coad.gse14333	MYOZ2	ANKS1B	GRIN2A	EFCAB5	ALS2CR11	LINC00486	C9orf84	AQP4	EDDM3A	LOC285740	C8orf46	LINC00301	SPOCK3	LOC100505750	EPHA6	TRPC3	ATP13A5	OR1A2	LOC100133920	RBM46	IL31RA	UBE2U	FAM19A4	CCDC65	BNC1	KRT222	PLAC1L	C4orf26	RANBP3L	MGAT4C	IMPG2	FLJ20518	GRIK2	LOC100268168	FCRL4	SPANXA2-OT1	DIRC1	ZNF876P	ZFP42	FAM218A	GABRG1	WDR49	LOC100507008	TRIM55	OR8G2	LOC148824	GPC5	GPR85	CNBD1
coad.tcga	null
ov.gse9891	null
ov.tcga	null
Top genes:	MYOZ2:1	ANKS1B:1	GRIN2A:1	EFCAB5:1	ALS2CR11:1	LINC00486:1	C9orf84:1	AQP4:1	EDDM3A:1	LOC285740:1	C8orf46:1	LINC00301:1	SPOCK3:1	LOC100505750:1	EPHA6:1	TRPC3:1	ATP13A5:1	OR1A2:1	LOC100133920:1	RBM46:1
[truncated: 1 more columns]
