# Supplementary material for: Biomolecular Events in Cancer Revealed by Attractor Metagenes
Source: PLoS Comput Biol. 2013 Feb 21;9(2):e1002920. doi: 10.1371/journal.pcbi.1002920 (PMC3581797; doi:10.1371/journal.pcbi.1002920)
Supplement: Table S7 — Common clusters from the six datasets using hierarchical clustering. (XLS) [file pcbi.1002920.s007.xls]

## Sheet: Sheet1
1	ID1	6
brca.gse2034	LCP2	IL10RA	PTPRC	DOCK2	FGL2	CD53	EVI2B	CD3D	PSMB9	CD48	CCL5	CCR5	ARHGAP25	CD97	APOBEC3G	SRGN	HLA-E	CORO1A	NCF4	CD2	CYTIP	HLA-DMB	CASP1	TRIM22	ITGB2	IRF8	IL2RG	LCK	TFEC	GPR171	PLAC8	CTSS	GMFG	SASH3	LYZ	GZMK	C1orf38	TNFRSF1B	LPXN	C1QB	PTPRCAP	RUNX3	IL7R	AIF1	AIM2	CTSC	HCLS1	CD52	PRF1
brca.tcga	LCP2	CD48	IL10RA	CD53	SASH3	HCLS1	CD3D	PLEK	PTPN7	PTPRC	CD2	CD5	IL2RG	SIT1	SH2D1A	CYBB	CCR5	CD6	PSTPIP1	NCKAP1L	PTPN22	SRGN	PRKCB	CD247	TRAT1	ITK	PVRIG	S1PR4	CST7	UBASH3A	DOCK2	SLAMF1	CCR2	WIPF1	PDCD1	CD3G	SIRPG	LCK	SLA	LAIR1	CYTH4	GMFG	ICOS	SLAMF7	DENND1C	CYTIP	CD96	BIN2	CD52
coad.gse14333	GBP1	APOL3	APOBEC3G	CCL5	RASGRP1	IDO1	GPR171	UBE2L6	CD247	CD2	CD3D	RARRES3	NKG7	STAT1	ITK	IFIT3	CXCL10	WARS	BIRC3	IRF1	CXCL13	PSMB9	HLA-E	TYMP	CXCR6	IL2RB	APOL6	BTN3A3	GZMK	ISG20	GBP2	CRTAM	SLAMF7	TAP1	CXCL9	FGL2	LAP3	LAG3	SAMHD1	PPP1R16B	XAF1	CCR5	SASH3	LAMP3	CD38	RAC2	ICAM1	SP140	GNLY
coad.tcga	PLEKHO1	SERPING1	NNMT	TRPV2	NR3C1	MRAS	MAFB	LAPTM5	C1orf38	NCF2	CFH	LY96	SRGN	AIF1	RAB31	SYT11	CHST11	LAIR1	CD33	GPNMB	VIM	DSE	CALHM2	VEGFC	GAS1	HSD11B1	VCAM1	LCP2	C1S	LSP1	CD53	TLR1	CYBB	FCGR2B	GFPT2	HCLS1	PLEK	SLA	EVI2A	BGN	CLIC2	SULF1	THBD	BASP1	S1PR1	FLI1	GMFG	SIGLEC7	DOK3
ov.gse9891	IFFO1	LY96	ZEB2	RAB31	C3AR1	EVI2A	GMFG	CLEC2B	FCGR2A	ARHGEF6	MS4A6A	GIMAP6	MNDA	CD14	HCK	SLC31A2	CD53	IL10RA	SH2B3	EPB41L3	TLR2	VCAM1	PTPRC	CD163	NCF4	GIMAP4	MS4A4A	WIPF1	SERPINF1	LAPTM5	LCP2	DAB2	FYB	CSF2RB	ITGB2	MYO1F	LAIR1	FCER1G	VSIG4	DOCK2	CSF1R	ARHGAP15	TYROBP	ARHGDIB	SLA	GLRX	SAMSN1	CD37	ITGAM
ov.tcga	SAMSN1	CD53	FCER1G	LCP2	C3AR1	LAPTM5	PTPRC	PLEK	C1QA	CD86	CYBB	GIMAP4	CLEC7A	TFEC	C1QB	CTSS	CASP1	AIF1	MS4A6A	GPR65	TYROBP	RNASE6	IL10RA	LAIR1	SLA	CCR1	ITGB2	FCGR2A	SRGN	LY86	SASH3	EVI2B	CD48	FGL2	CD14	GIMAP6	HCK	GMFG	EVI2A	ARHGAP15	CD163	TRIM22	PSMB9	TLR2	HLA-DPA1	LST1	CD37	DOCK2	HLA-DPB1
Top genes:	LCP2:5	CD53:5	GMFG:5	IL10RA:4	PTPRC:4	DOCK2:4	SRGN:4	SASH3:4	SLA:4	LAIR1:4	FGL2:3	CD3D:3	PSMB9:3	CD48:3	CCR5:3	CD2:3	ITGB2:3	AIF1:3	HCLS1:3	PLEK:3
2	ID21	6
brca.gse2034	TCEB1	MTDH	POLR2K	AZIN1	ARMC1	MRPL13	PUF60	TMEM70	COPS5	ZNF706	MTERFD1	ATP6V1C1	SLC25A32	MRPL15	MTFR1	FAM82B	ZNF7	EXOSC4	DERL1	HRSP12	CYC1	TERF1	UBR5	INTS8	KIAA0196	WDYHV1	UBE2V2	C8orf33	RRS1	RAD21	PYCRL	ENY2	ATP6V1H	TRMT12	RB1CC1	SLC39A4	RAD54B	EBAG9	ZFAND1	CPNE3	TCEA1	UQCRB	TAF2	EFR3A	DPY19L4	SCRIB	PTDSS1	BOP1	DSCC1
brca.tcga	MTERFD1	MRPL13	PUF60	TCEB1	MTDH	ENY2	AZIN1	YWHAZ	HSF1	MTFR1	C8orf33	RAD21	ARMC1	MRPL15	CYC1	TMEM70	POLR2K	ATP6V1C1	DERL1	PTDSS1	STK3	PRKDC	SLC25A32	PTK2	EXOSC4	HRSP12	TAF2	SCRIB	ZNF706	UBE2V2	COPS5	RRS1	EBAG9	BOP1	WDYHV1	RB1CC1	TRMT12	ZNF696	PYCRL	CPNE3	INTS8	ARFGEF1	SQLE	ZNF250	LACTB2	TCEA1	KIAA0196	PHF20L1	ATP6V1H
coad.gse14333	MLH1	PLAGL1	TMEM176B	TGFBI	PMEPA1	CCDC92	TMEM176A	TXNDC9	SOX4	KIAA0355	DDAH2	DAB2	TRAF5	APOLD1	RAB32	TTC37	EPM2AIP1	GSPT2	SLC6A6	SESN1	STK38L	LAPTM4B	LRIF1	TNS3	RAP2A	QPCT	SLC22A3	SKIL	NUBPL	ENAH	CDKN1B	TMCC1	GPR56	RHOBTB1	TSPAN31	SLC16A4	MAN2A1	LGR5	AMT	VASH2	ZAK	TRMT12	GALNT11	PRKD3	LRP1	PTK7	NME4	DNMT3B	PGBD5
coad.tcga	MTERFD1	ARFGEF1	C8orf33	HRSP12	INTS8	CHCHD7	UBR5	CPNE3	KIAA0196	RNF139	PYCRL	HSF1	BOP1	MRPL15	E2F5	UBE2V2	MRPL13	DSCC1	TMEM70	ZNF250	DPY19L4	STK3	RRS1	PRKDC	RB1CC1	FAM49B	ANKRD46	POLR2K	MTFR1	LAPTM4B	RPL8	ATAD2	TRMT12	ZNF34	PDP1	ZNF696	LACTB2	SNX16	ELF5	SLC39A4	CYC1	RIPK2	LYPLA1	GPAA1	FNTA	PEX2	GRINA	CSPP1	COX6C
ov.gse9891	AZIN1	ATP6V1C1	PTK2	DERL1	SLC25A32	ZNF7	PYCRL	MTERFD1	SHARPIN	DGAT1	RAD21	EBAG9	MRPL13	BOP1	RPL8	POLR2K	UBR5	KIAA0196	MTDH	ZNF34	LAPTM4B	ZNF16	INTS8	ZC3H3	UBE2W	ZNF250	WWP1	SLC39A4	YWHAZ	TPD52	FAM49B	TSTA3	FAM82B	HSF1	GRINA	FBXL6	PLEKHF2	EFR3A	UQCRB	EXOSC4	PHF20L1	GPAA1	SCRIB	C8orf33	PUF60	VPS28	OPLAH	PTDSS1	CYC1
ov.tcga	DERL1	ZNF7	ATP6V1C1	EXOSC4	EBAG9	KIAA0196	MTDH	SLC25A32	MRPL13	CYC1	PTK2	GPAA1	ZNF16	AZIN1	DGAT1	WDYHV1	PUF60	RAD21	VPS28	PLEKHF2	UBR5	RNF139	TAF2	TRMT12	WWP1	C8orf33	SHARPIN	BOP1	HRSP12	FAM49B	YWHAZ	GSDMD	MTERFD1	POLR2K	TCEB1	DPY19L4	PYCRL	GRINA	EFR3A	SQLE	ATAD2	OXR1	TSTA3	FZD6	ARMC1	ENY2	ZNF706	TPD52	LAPTM4B
Top genes:	POLR2K:5	MRPL13:5	MTERFD1:5	CYC1:5	KIAA0196:5	C8orf33:5	PYCRL:5	TRMT12:5	BOP1:5	MTDH:4	AZIN1:4	PUF60:4	ATP6V1C1:4	SLC25A32:4	EXOSC4:4	DERL1:4	HRSP12:4	UBR5:4	INTS8:4	RAD21:4
3	ID18	6
brca.gse2034	MLPH	GATA3	AGR2	CA12	TBC1D9	ABAT	XBP1	SCUBE2	SPDEF	FBP1	MAGED2	SLC39A6	TFF3	LRBA	DNAJC12	SLC22A5	SLC7A8	TTC39A	KDM4B	CYB5A	CIRBP	RHOB	ANXA9	MYO5C	MAPT	DNALI1	MYB	AR	C14orf45	P4HTM	ERBB4	C6orf211	CACNA1D	SUOX	TFF1	GPD1L	CELSR1	KRT18	SYBU	ESR1	VAV3	REEP5	DALRD3	PNPLA4	GALNT7	C10orf116	WFS1	CRIP1	BBS1
brca.tcga	ESR1	MLPH	CA12	AGR2	THSD4	TBC1D9	ANXA9	XBP1	SCUBE2	ABCC8	SPDEF	NAT1	GATA3	TFF3	SLC44A4	AR	CLSTN2	ZMYND10	DNALI1	DNAJC12	SLC7A8	ERBB4	INPP4B	ABAT	SIDT1	GAMT	EVL	ZNF552	FBP1	SLC39A6	DACH1	TSPAN1	MAGED2	IGFALS	CCDC48	LRRC48	AFF3	KDM4B	C9orf116	P4HTM	MAPT	BCAS1	INPP5J	WFS1	ACADSB	CASC1	GFRA1	ANKRA2	IL6ST
coad.gse14333	FCGBP	SPINK4	MLPH	CAPN9	AQP3	SPDEF	ATOH1	ANG	PTGER2	CREB3L1	ASRGL1	ZBTB7C	CTSE	TOX	CA8	TCN1	SERPINA1	GALNT8	GNE	MUC4	RAP1GAP	HSPA2	BCAS1	XBP1	KLF4	SLC35A1	KIAA1324	RAB27B	CHST5	PCSK1	KLK1	RAB26	RNF125	CKAP4	MUC5B	CD55	MUC1	ST3GAL4	PLD1	CRIP1	C4BPB	HYAL1	FAM46A	IL1R2	MAP3K5	TFF1	SRD5A3	SIDT1	F3
coad.tcga	FCGBP	NEURL	TOX	CBFA2T3	CAPN9	MB	CRYM	PTGER2	ATOH1	SPDEF	KLK12	FHL2	SPINK2	SLC18A1	BMX	SLC9A2	GNA14	MAPRE2	CCNJL	BCAS1	CASD1	PLD1	RGS13	GALNT8	SCNN1A	SCGB2A1	KLK15	KLK1	AQP3	RAP1GAP	RAB26	PDE9A	KLF4	MATN2	RNASE4	NEDD9	DNAJC12	NOL4	MYBPC2	C15orf2	ABHD3	ACSM1	EPHA4	ANG	ALDH1L1	TNFRSF11A	TFF3	CA8	MGLL
ov.gse9891	IFRD2	OXSM	UBP1	GNL3	APPL1	APEH	UQCRC1	CTDSPL	RPP14	GPD1L	ABHD14A	CCDC51	ANKRD28	CAPN7	P4HTM	EPM2AIP1	IP6K2	LAMB2	HIGD1A	DAG1	DALRD3	TKT	ABHD5	SMARCC1	HYAL3	SLC25A38	TMEM43	PRKCD	ALAS1	TSEN2	WDR6	GOLGA4	ANO10	GORASP1	NT5DC2	NR1D2	SFMBT1	SRGAP3	SH3BP5	MYRIP	OCA2	SETMAR	SEC14L4
ov.tcga	APEH	GORASP1	MKRN2	IFRD2	SLC25A20	DHX30	LARS2	EXOSC7	PDCD6IP	DALRD3	RPP14	OXSR1	NGLY1	P4HTM	SNRK	UQCRC1	SACM1L	NEK4	MLH1	APPL1	OXSM	UBP1	SCAP	DCP1A	GPD1L	GLB1	ACAA1	ARF4	SPCS1	TSEN2	ALAS1	SMARCC1	SS18L2	TKT	TATDN2	GNL3	TOP2B	TEX264	CCDC51	HIGD1A	PRKCD	USP4	NR1D2	NDUFAF3	DYNC1LI1	LAMB2	PSMD6	TCTA	CYB561D2
Top genes:	SPDEF:4	P4HTM:4	MLPH:3	XBP1:3	TFF3:3	DNAJC12:3	GPD1L:3	DALRD3:3	BCAS1:3	GATA3:2	AGR2:2	CA12:2	TBC1D9:2	ABAT:2	SCUBE2:2	FBP1:2	MAGED2:2	SLC39A6:2	SLC7A8:2	KDM4B:2
4	ID37	6
brca.gse2034	ZNF148	THOC2	SRRM2	SCAF11	ESF1	BRD2	RSRC1	UBN1	TOP1	PDPK1	PKN2	RBM25	PRRC2C	AP3D1	SMC3	HIST1H4C	SLC25A36	NAA15	GOLGA2	EPRS	RORA	ZBTB38	NFIC	DDX24	PLEKHA1	RAP2A	PRRC1	KIAA1033	MLEC	HNRNPL	PHACTR2	DNAJC3	USP47	GNA11	PTPN4	STAG2	ING3	ZNF573	TBL1X	KPNA3	TBC1D8B	DICER1	MAP9	TOB2	BICD2	WSB1	NELF	NDE1	PLIN3
brca.tcga	GIGYF2	KDM4A	REST	SMAD5	CEP290	CRCP	ZBTB43	DLGAP4	ASH1L	SLC25A36	MTF1	HIST1H4L	ZNF654	RYBP	HIST1H4C	STX6	LIMS1	UTP20	PPP1R3D	CBX1	PRKCI	NFAT5	AHCTF1	ERC1	PURA	ZNF669	SYNJ2BP	YTHDC2	RORA	FOXN2	SYNE2	MSH3	ANKRD11	KIAA0319L	P2RY1	MPHOSPH8	HDGF	PRKAB2	ZBTB7A	COL4A3BP	GPR135	VASP	NUCKS1	FAM172A	ARGLU1	CLIP1	NCOA3	OTUD3	PNISR
coad.gse14333	DMTF1	CLASP1	PNISR	TIA1	ABCC5	CSAD	RAB11FIP2	ANKS1A	RBM6	OGT	CCNL1	HNRNPA2B1	CLK4	PTBP2	CLK1	WSB1	ZFC3H1	CCNL2	PAN2	MAN2C1	KIAA0754	DST	FAM179B	ZNF573	ECHDC2	C1orf63	POLI	NKTR	EFHC1	TEAD3	LUC7L3	BAZ2B	ZCCHC11	MDM1	ZNF302	HSPBAP1	PBXIP1	TCERG1	CDK5RAP3	ZNF75D	KIAA0907	GOLGA4	PRPF4B	AASS	IFT81	PBX1	WLS	CROCCP2	REV3L
coad.tcga	HCFC1	PACSIN2	RALGDS	AP3D1	ITPR3	MYO1C	ZFYVE9	EEF2	SMARCA4	KIAA0284	DOHH	NCOR2	GATAD2A	MYH9	SYMPK	HNRNPM	LONP1	ANKRD11	TNPO3	CHAF1A	KPNB1	FBXW4	TCF20	SLC39A7	BRD3	TMEM184B	MED13L	TTLL12	HIP1R	ZBTB7A	HIC2	TAOK2	MFN2	ABR	ZZEF1	CLASRP	KLF13	AKAP13	TCOF1	FUS	ARHGEF18	PTPRF	BRD2	KIF1C	ARHGAP26	AHNAK	PKP3	HIRA	KIFC1
ov.gse9891	TOP1	KIAA1033	SMC3	PPIG	DNAJB14	RIF1	NDUFS1	RBM25	TPR	NCOA3	ANKRD11	TGS1	SYNE2	EPRS	TMEM5	RPAP2	MIS18BP1	QSER1	USP1	ACBD3	SCAMP1	NAA40	ESF1	CHD9	DDX17	NFAT5	ALS2CR8	CDC42BPA	EIF2C3	MORF4L2	RBBP5	ADNP2	TRAK2	PTPN4	IL6ST	TOR1AIP1	ATP6V1A	KLF13	EDEM3	MFHAS1	CBX5	UGCG	CNTRL	TMEM159	CCNT1	PTPN1	TEAD1	ZBTB20	PPP1R3D
ov.tcga	ZNF638	RBBP6	USP34	PRRC2C	NKTR	GPATCH8	USP47	TPR	SF1	CLASP1	RBM6	KIDINS220	CEP350	RANBP2	ANKRD11	ZC3H4	ALMS1	CNNM3	FNBP4	KAT6B	NCOA1	MPRIP	CPSF7	ZFC3H1	BCLAF1	CUX1	EIF5B	SERTAD2	ASXL2	ESF1	SUV420H1	PHIP	MED1	NCOR1	PNISR	BAZ1B	TCERG1	TNPO3	SNRNP200	TTC3	ATAD2B	PPP1R10	DCTN1	TRA2A	SMG1	NFAT5	PHF21A	PILRB	ZNF692
Top genes:	ANKRD11:4	ESF1:3	NFAT5:3	PNISR:3	BRD2:2	TOP1:2	RBM25:2	PRRC2C:2	AP3D1:2	SMC3:2	HIST1H4C:2	SLC25A36:2	EPRS:2	RORA:2	KIAA1033:2	USP47:2	PTPN4:2	ZNF573:2	WSB1:2	PPP1R3D:2
5	ID36	6
brca.gse2034	RBM7	DR1	CAPZA2	MCTS1	MDH1	NFE2L2	GTF2B	VBP1	LAMP2	MCFD2	MED17	FAM3C	PDCD10	SDHD	NDUFB5	TMEM30A	EEF1E1	BIRC2	KCTD9	FDX1	COX7B	MFSD1	TMED5	CSGALNACT2	TMEM126B	TDP2	SNX7	GNAI3	HSPA13	PSMA4	OSTM1	PTS	NOP10	COMMD8	ETFA	UGP2	PELO	DCK	CCDC90B	PPP2R3C	C1GALT1C1	MOSPD1	PSMD10	ANXA4	MRPL39	MAP2K1	RNF13	C11orf73	ACVR1
brca.tcga	CHUK	VBP1	CAPZA2	FEM1C	SLC35A5	TMEM66	TMEM30A	SRP9	MAPK9	SNAP23	FBXO3	RCHY1	RBM7	FBXL4	TMEM50B	VPS26A	IFT52	MINPP1	THAP9	ZNF267	TMED2	FAM3C	TSPYL1	MAT2B	MANEA	EEF1A1	PIGF	FECH	CCNC	ITFG1	ETNK1	INSIG2	B3GNT2	NXT2	ERMAP	WEE1	LIG4	ZNF140	L2HGDH	HIGD1A	TWSG1	TPMT	SUCLG2	PJA1	TM2D1	CEPT1	RPRD1A	C14orf109	NME7
coad.gse14333	TMBIM1	ASAP2	TINAGL1	SDC4	COBL	CD151	FAM3C	PERP	PDGFA	PLEKHA1	CLSTN1	DHRS3
coad.tcga	SELT	CGRRF1	SAR1B	GOLT1B	CNIH	STK17B	MED28	NRAS	SPA17	SEP15	C14orf109	YAF2	HIST1H3D	COMMD10	CRIPT	ANAPC10	SIVA1	CALM2	NDUFA2	NSL1	TMEM14B	COMMD8	CKLF	CD58	C2orf49	GSTO1	ASNA1	BNIP1	YEATS4	SLC35A5	TIMM8B	TMEM126B	GEMIN2	MRPL11	OAZ3	SLC38A6	HIST1H2AB	CNIH4	IL18	ITGB1BP1	NDUFB1	HIST1H1E	RCHY1	SDHB	TMEM50B	FPGT	FBXL5	NDUFB7	CINP
ov.gse9891	DDX10	DLAT	AASDHPPT	RBM7	C11orf57	ZNF259	DPAGT1	TIMM8B	EED	YAP1	EI24	SDHD	TRAPPC4	ALG9	PTS	SLC37A4	RDX	C11orf73	CEP57	ACAD8	TMEM135	HMBS	JRKL	MRE11A	BACE1	TMEM123	APLP2	PANX1	EXPH5	SLC35F2	MPZL2	PUS3	RAD54B	THYN1	NRGN	DCPS	ARHGAP32	GCNT2
ov.tcga	FDX1	ZNF259	NDUFS8	TRAPPC4	DPAGT1	SSSCA1	DDX10	CEP57	SDHD	TMEM126B	DLAT	YIF1A	TIMM8B	ALG9	MRPL11	C11orf73	HMBS	HINFP	BAD	RBM7	TMEM135	MRPL49	ACAT1	AASDHPPT	CLP1	C11orf57	SRSF8	TMEM134	ANKRD49	PPP1CA	DCPS	FIBP	MED17	ACAD8	EI24	TIMM10	MEN1	SAC3D1	C11orf48	SNX19	RDX	DPP3	CCDC90B	NCAPD3	POLA2	CHCHD8	CDK2AP2	PTS	IFT46
Top genes:	RBM7:4	FAM3C:3	SDHD:3	TMEM126B:3	PTS:3	C11orf73:3	TIMM8B:3	CAPZA2:2	VBP1:2	MED17:2	TMEM30A:2	FDX1:2	COMMD8:2	CCDC90B:2	SLC35A5:2	RCHY1:2	TMEM50B:2	C14orf109:2	ACAT1:2	MRPL11:2
6	ID80	6
brca.gse2034	LIN37	PAF1	NOSIP	GPATCH1	POLR2I	RBM42	ZNF146	TBCB	SPATA2L	KLHDC4	C19orf60	ZNF544	TMEM147	EFCAB2	ZNF274
brca.tcga	ZNF254	ZNF430	ZNF43	ZNF85	ZNF675	ZNF208	ZNF117	ZNF492	ZNF606	ZNF154	ZNF83	ZNF549	ZNF442	ZNF329	ZNF419	ZNF551	ZNF14	ZNF91	ZNF350	ZSCAN18	ZNF135	ZNF682	ZNF415	ZNF701	ZNF175	ZNF274	ZNF550	ZNF671	ZNF426	ZFP112	ZNF528	ZNF471	ZNF257	ZNF10	ZNF222	DNAJC28	ZNF132	ZNF33B	CRELD1	ZNF667	TAF1B	ANKRD26	YIPF3
coad.gse14333	ZNF253	ZNF273	ZNF675	ZNF180	ZNF227	ZNF91	ZNF329	ZFP112	ZNF254	ZNF468	ZNF223	ZNF606	ZNF83	ZNF551	ZNF430	ZNF14	ZNF43	ZNF137P	ZNF682	ZNF226	ZNF84	ZNF134	ZNF614	ZNF211	ZNF45	ZNF350	ZNF140	ZNF544	ZNF224	ZNF586	ZNF117
coad.tcga	MOCS1	ZNF43	FBXO17	PTK7	SCARA3	PPAP2B	ZNF419	CERS4	ZNF492	ZSCAN18	LARP6	SLC7A10	ZNF134	ZNF85	CHST10	ZNF528	ZNF606	ZNF345	CLU	RGN	ZNF471	ZNF350	ZNF549	C16orf5	ZNF430	ZNF675	ZNF117	SCAMP5	ZNF167	SMO	ZNF287	ELOVL5	FAM127A	ZNF254	PLAG1	PCDH8	CHFR	ZNF682	FAM127B	ZNF426	DNMT3B	NRXN3	DCLRE1C	PCBP3	RBP1	ASAP1	SNTA1	ZNF175	NES
ov.gse9891	ZNF304	ZNF329	ZNF226	ZNF211	ZNF180	ZNF606	ZNF45	ZNF227	ZNF135	ZNF551	ZNF667	ZFP112	ZNF134	ZNF274	ZNF222	ZSCAN18	MGC2752	ZNF264	ZNF223	ZNF350	ZNF224	ZNF544	ZNF415	MZF1	ZFP37	ZNF137P	TTC33	ZNF132	ZNF586	ZNF83	ZSCAN5A	ZNF468	CHMP2A	NDUFA3	TFPT	ETFB	ZNF787
ov.tcga	VRK3	BCKDHA	HSPBP1	NAPA	PSMC4	ATP5SL	ZNF329	IRF3	ZNF180	RUVBL2	PNKP	PRPF31	LIG1	TSEN34	ZNF45	NUP62	CALM3	TFPT	ZNF304	PAK4	NUCB1	LIN37	BCAT2	HNRNPUL1	ANKRD27	ZNF211	KDELR1	UBE2S	MGC2752	ZNF230	SUPT5H	ZFP112	NOSIP	EXOSC5	POLD1	ZNF274	CYTH2	ZNF576	PRKD2	PIH1D1	RBM42	BAX	GYS1	PAF1	UBA2	ZNF606	STRN4	ECH1	MRPS12
Top genes:	ZNF606:5	ZNF274:4	ZNF329:4	ZNF350:4	ZFP112:4	ZNF544:3	ZNF254:3	ZNF430:3	ZNF43:3	ZNF675:3	ZNF117:3	ZNF83:3	ZNF551:3	ZSCAN18:3	ZNF682:3	ZNF180:3	ZNF134:3	ZNF211:3	ZNF45:3	LIN37:2
7	ID28	6
brca.gse2034	IQCG	SOAT1	VASH2	DIMT1	ME2	GALNT2	PRPS1	CDK18	DEGS1	G3BP1	CDC42EP4
brca.tcga	ZBBX	DNAI2	TEKT2	FOXJ1	LRP2BP	CCDC19	MAK	EFCAB1	KCNE1	DNAH9	CCNO	EFHC2	SERPINI2	DNAI1	PNLIP	MOK	FGFR2	IQCG	DNAH3
coad.gse14333	PAK3	CLEC1A	GPR52	FAM124B	CA14	EGFR	OR1A1	CPN2	CD1A	SLC12A5	PGLYRP4	MAMLD1	EFHD1	FMO4	HSPB6	FBXL2	SV2A	SALL2	RIMBP2	C11orf16	GPR22	WNT10B	CYP2C9	PSORS1C2	KIAA1467	ZNF365	RNF39	PRPH	HOXC11	C14orf45	ELMO1	CBLN1	CCL16	SLMO1	GABBR1	LAIR2	GPR19	CHRM2	SEMA3G	FAM184A	FAM155B	YBX2	PADI3	CLSTN2	TDRD1	ZNF187	BHMT	HAL	FGD1
coad.tcga	SNCG	GPR87	KLK5	CASC1	ZMYND10	SPAG8	TAGLN3	CCDC19	SERPINI2	IVL	RGS20	CRABP2	KRT5	TSNAXIP1	VGLL1	PADI1	VTCN1	DKK1	ANKRD1	MAK	TMEM40	MIA	MAPK10	CDKN2A	EFCAB2	NMU	SLCO1B1	C6	PCOLCE2	SEPW1	MAP7D3	SLCO1B3	IGF2BP3
ov.gse9891	MUC5B	ANKMY1	C14orf45	DNAH9	DNAI1	DLEC1	KCNE1	C9orf116	DNAAF1	ZMYND10	AGBL2	DNAI2	SLC22A4	DUSP4	EFCAB1	KIF13B	WDR78	C6	TMEM231	HYDIN	TSNAXIP1	SPEF1	WDR96	C11orf16	TBC1D8	ZNF185	TSGA10	CCDC81	IL20RA	SMPD2	MGLL	MCAT	SPA17	NEIL1	CDS1	NME5	CCDC19	B9D1	RIBC2	TPPP3	RFX2	RIMBP2	GCNT3	TEKT2	DNAH7	RPGR	C14orf105	MYO5C	TFF3
ov.tcga	CCDC19	ZMYND10	EFCAB1	ZBBX	TEKT2	C9orf116	CASC1	DNAAF1	C14orf45	LRRC23	FOXJ1	MAK	MNS1	NEK11	TPPP3	EFHC2	NME5	EFHC1	SPA17	LRRC48	CCNO	TTC26	RPGR	RAB36	LRRC6	TMEM231	PPOX	PACRG	C1orf114	SPAG6	NUP62CL	DYNC2H1	RIBC2	DNALI1	KIAA0895	DUOX1	MLF1	EFCAB2	TTC30A	IFT57	C9orf9	IQCG	TTC12	CEP112	MTL5	MOK	MAGI2	MTHFD2L	CYFIP2
Top genes:	CCDC19:4	IQCG:3	TEKT2:3	MAK:3	EFCAB1:3	C14orf45:3	ZMYND10:3	ZBBX:2	DNAI2:2	FOXJ1:2	KCNE1:2	DNAH9:2	CCNO:2	EFHC2:2	SERPINI2:2	DNAI1:2	MOK:2	RIMBP2:2	C11orf16:2	CASC1:2
8	ID81	6
brca.gse2034	SNRNP70	CPT1B	WDR6	SGSM2	PAN2	RBM6	SFI1	TRIM45	ACADVL	HOOK2	QTRT1	TRPV1	RPH3AL	IP6K2	KAT2A	DDAH2	MOK	TACC2	GABBR1	ZNF193	GNL3
brca.tcga	PILRB	SEC31B	CROCCP2	MYO15B	ITIH4	C1orf63	L3MBTL1	KIAA0664L3	ANKRD10	KIAA0754	EBLN2	BZRAP1	AMT	PAQR6	MIR600HG	PILRA	TAS2R10	CYP2E1	GABBR1	MYH3	SLC7A9	MAGI1	AVIL	LRP5L	SGK2	DCUN1D2	UPF3A	NANOG	RAB40A	MPP3	FBXO41	ING1	MYO16
coad.gse14333	UBL3	N4BP2L1	STARD13	HNMT	CLN5	GAS6	SLC46A3	KCNH2	RNF130	LRIG1	OPTN	CAMLG
coad.tcga	LRP5L	CPT1B	GNRH1	PAN2	KLKB1	REC8	C1orf63	C10orf68	ARHGEF10	HSD17B3	MYH3	PAQR6	SFI1	SLC25A37	WSB1	LINC00115	KLRAP1	GABBR1	PPIP5K2
ov.gse9891	DIS3	CUL4A	KIAA1704	CARKD	SUCLA2	RNF219	PCID2	PIBF1	AKAP11	ANKRD10	IPO5	WBP4	PROSER1	TGDS	CDC16	UTP14C	RCBTB1	TM9SF2	UPF3A	ALG5	TRIM13	TUBGCP3	SAP18	UGGT2	STK24	EFHA1	CARS2	LIG4	MRPS31	UFM1	FARP1	EXOSC8	MYCBP2	IRS2	UBL3	KPNA3	TMCO3	NUDT15	DCUN1D2	MIPEP	PARP4	PDS5B	INTS6	NEK3	LAMP1	RAP2A	GTF3A	ELF1	UCHL3
ov.tcga	SUCLA2	UTP14C	RNF219	USPL1	TGDS	MED4	PDS5B	CDC16	MRPS31	AKAP11	UFM1	KPNA3	PIBF1	IPO5	TPP2	EXOSC8	UPF3A	ELF1	MTMR6	ALG5	SAP18	CUL4A	CKAP2	RCBTB1	UCHL3	CARKD	UGGT2	UBL3	TRIM13	EFHA1	ESD	MIPEP	TM9SF2	CLN5	RBM26	INTS6	TDRD3	RNASEH2B	RFC3	MTRF1	NUDT15	STK24	MPHOSPH8	PCID2	SLC25A15	ANKRD10	SPG20	HSPH1	POLR1D
Top genes:	GABBR1:3	ANKRD10:3	UPF3A:3	UBL3:3	CPT1B:2	PAN2:2	SFI1:2	C1orf63:2	PAQR6:2	MYH3:2	LRP5L:2	DCUN1D2:2	CLN5:2	CUL4A:2	CARKD:2	SUCLA2:2	RNF219:2	PCID2:2	PIBF1:2	AKAP11:2
9	ID39	6
brca.gse2034	DCTN6	LEPROTL1	UBXN8	GTF2E2	CNOT7	MAK16	WRN	FDFT1	AGPAT5	GSR	FZD3
brca.tcga	KCTD9	WRN	PPP2R2A	TNFRSF10B	PPP2CB	SLC25A37	MAK16	AGPAT5	EPB49	ARHGEF10	SCARA3	GNRH1	FDFT1	UBXN8	CLU	FZD3	TRIP6	DOCK5	CLN8	TRIM17	GSR
coad.gse14333	GTF2E2	PBK	CNOT7	GSR	KCTD9	CHMP7	UBXN8	TMEM66	LEPROTL1	REEP4	SEC22B	XPO7	PPP2R2A	DCTN6	TNFRSF10B	MAK16	ELP3	EXOSC9	HSPA4L	NUTF2	HNRNPH1	FDFT1	MTA2	CCDC25	INTS9	TNFSF9	BIN3	HNRNPL	GPR126	SPCS3	DDB2	MCPH1	AGPAT5	SLC7A11	FDXR	MTUS1	MORC4	ASAH1	RPS27L	CCDC109B	CASP2	CRELD2	C4orf27	ATP6V1B2	WRN	PCM1	INPP1	MANF	BTG3
coad.tcga	GTF2E2	PPP2R2A	CNOT7	LEPROTL1	PPP2CB	SH2D4A	CCDC25	ELP3	TNFRSF10B	CHMP7	WRN	PCM1	ATP6V1B2	MCPH1	TMEM66	MAK16	KCTD9	GSR	UBXN8	MTUS1	AGPAT5	PBK	SLC39A14	XPO7	NAT1	FDFT1	PPP3CC	ADAM9	ZNF395	EPB49	PSD3	TNFRSF10D	NUDT18	BRF2	KIF13B	BAG4	FZD3	DDHD2	RAB11FIP1	ITPR2	SOX14	EIF4EBP1	PROSC	ERLIN2	RHOBTB2
ov.gse9891	PPP2R2A	INTS9	GTF2E2	DCTN6	CNOT7	PCM1	MAK16	BIN3	ELP3	TNKS	CHMP7	TMEM66	TUSC3	CCDC25	XPO7	LEPROTL1	AGPAT5	POLR3D	WRN	ZNF395	MTMR9	ARHGEF10	FZD3	ERLIN2	SLC25A37	DDHD2	EPHX2	TNFRSF10B	GSR	FDFT1	ASH2L	PROSC	RAB11FIP1	HMBOX1	LSM1	BAG4	FGFR1	PLEKHA2
ov.tcga	LEPROTL1	GTF2E2	PPP2R2A	MAK16	INTS9	DCTN6	TMEM66	XPO7	KCTD9	ERLIN2	PROSC	CNOT7	CCDC25	WRN	MTMR9	ASH2L	LSM1	DDHD2	GOLGA7	ZNF395	FZD3	UBXN8	HMBOX1	PLEKHA2	ELP3	TUSC3	KIF13B	EPHX2	RAB11FIP1	GSR	THAP1	AGPAT5	FDFT1	MSRA	ADAM9	NAT1	SH2D4A	REEP4	CTSB	SLC39A14	SLC25A37	EPB49	RNF170	FNTA	AP3M2	POLB	PSD3	EIF4EBP1	FGFR1
Top genes:	MAK16:6	WRN:6	FDFT1:6	AGPAT5:6	GSR:6	LEPROTL1:5	UBXN8:5	GTF2E2:5	CNOT7:5	FZD3:5	PPP2R2A:5	DCTN6:4	KCTD9:4	TNFRSF10B:4	TMEM66:4	XPO7:4	ELP3:4	CCDC25:4	SLC25A37:3	EPB49:3
10	ID3	6
brca.gse2034	ANP32E	CEBPG	EN1	GTPBP4	CENPA	BTG3	MELK	NDC80	CDC20	YEATS2	TTK	FAM171A1	STIL	CDH3	CCNA2	MCM6	ASPM	CEP55	KIAA0020	KLHL7	PHGDH	VGLL1	KRT6B	EZH2	CDKN2A	DLGAP5	ACTR3B	KIF14	PDSS1	CDK2AP1	AMD1	GPN1	MCM10	IFRD1	GMPS	DKC1	SOX10	TRMT11	CENPN	MICALL1	TCF7L1	CCNE1	RSU1	HJURP	TMEM158	FOXM1	STMN1	TRIM2	DSC2
brca.tcga	PSAT1	FOXC1	BCL11A	UGT8	FAM171A1	FOXL1	VGLL1	ART3	STAC	CHODL	IFRD1	TTLL4	FZD9	C11orf75	LY6D	CDH3	DSC2	CCNE1	SLC6A14	YEATS2	MID1	RARRES1	LDHB	MPP6	SOX10	KCNN4	TTYH1	EN1	MIA	FERMT1	HIST1H1A	SERPINB5	PRKY	TRIM29	KLK6	CDC20	ACE2	IL12RB2	KCNK5	RASAL1	GABRP	MATN4	EGFR	CDK6	SFT2D2	CENPN	RHCG	PRKX	UCK2
coad.gse14333	SFPQ	SRSF2	USP1	NAA50	RAN	KIF23	RBM15	RFC5	NUP37	NOLC1	CCT7	MRPS16	LSM4	POLR2D	HSPA4	DENR	KPNA2	BUB3	BUB1	KIF11	TMPO	PSMC6	MRPS12	MCMBP	HNRNPF	DHX9	KIF18A	STIL	GART	YRDC	TIMM23	MRPL19	LIN7C	SNRPA1	RACGAP1	DEPDC1	LARP4	FUBP1	MRPL44	NUP50	H2AFZ	CDC25A	TMEM48	CAND1	PEX13	ATAD2	EXOSC2	SMC4	LYRM2
coad.tcga	MCM10	CCNA2	DEPDC1	TIPIN	CDC45	DLGAP5	ORC1	BUB1	OIP5	CDC20	KIF23	GINS3	CCNB1	CCNB2	BIRC5	AURKB	NUSAP1	DNA2	KIF18A	ARHGAP11A	POLE2	SHCBP1	CDK1	DHFR	SPC25	KIF20A	NDC80	H2AFZ	CENPN	MAD2L1	VRK1	WDHD1	EXO1	RRM2	CHEK1	MPHOSPH9	PTTG3P	RAD51	BUB1B	FANCI	CENPA	CEP55	CENPM	TYMS	GINS2	HAUS2	CHAF1B	SMC2	PTTG2
ov.gse9891	TPX2	KIF2C	BUB1	NCAPH	CENPA	HJURP	TTK	MELK	CDKN3	PRC1	KIF14	RACGAP1	AURKA	KIF23	MKI67	BIRC5	OIP5	AURKB	CDK1	CDCA3	KIF11	CCNB2	UBE2C	ASPM	KIF15	NUSAP1	DEPDC1	KIF4A	POLQ	CENPF	ECT2	ZWINT	MCM10	FOXM1	CCNA2	DLGAP5	KIF20A	TOP2A	CENPE	RAD51AP1	CEP55	BUB1B	E2F8	DTL	TROAP	KPNA2	GTSE1	GINS1	CDC20
ov.tcga	CAV2	CAV1	HRH1	MET	EDN1	CRIM1	MMP7	PALMD	TMEM43	ALCAM	ITGA2	RASGRP1	GULP1
Top genes:	CDC20:4	CENPA:3	CCNA2:3	CEP55:3	DLGAP5:3	MCM10:3	CENPN:3	KIF23:3	BUB1:3	DEPDC1:3	EN1:2	MELK:2	NDC80:2	YEATS2:2	TTK:2	FAM171A1:2	STIL:2	CDH3:2	ASPM:2	VGLL1:2
11	ID31	6
brca.gse2034	GADD45GIP1	NDUFB7	NDUFA7	PIN1	PGLS	ATP5D	NDUFS7	C19orf53	TIMM13	LONP1	RFXANK	NDUFA13	MRPL34	LSM7	USE1	UBL5	RAB8A	COX5B	KEAP1	ILVBL	STAP2	UQCRC1	PRDX2	WDR18	XAB2	ATP13A1	SH2D3A	TYK2	PXMP4	ANO10
brca.tcga	LMNB1	TAF15	PFDN6	LIMK1	MFHAS1	APP	TAF5L	STK16	CSTF2T	SLC39A7	ZFYVE9	PBX2	AP1S1	CSPG5	ATP1A3
coad.gse14333	GADD45GIP1	NDUFA7	TIMM13	APRT	ATP5D	SLIRP	SIVA1	UQCRQ	NDUFB2	TIMM8B	SF3B5	PFDN6	C14orf2	MYCBP	LMNB1	NCLN	ATP5J2	NDUFA13	MRPS2	MAGOH	LSM3	COX5B	FBL	ATP6V0B	DOHH	DYNLT1	FAM173A	TSPO	COX17	PTS	POLR2I	CHAF1B	COX7C	FAM96B	PDCD5	ATP5I	UBL5	HSD17B12	NDUFS5	NOSIP	LRFN4	F12	PAFAH1B3	HMGA1	PGLS	SLC27A5	ISOC2	PLCB3	S100P
coad.tcga	TAF15	LMNB1	LIMK1	HNRNPA0	MFHAS1	CSTF2T	PBX2	RAD50	MET	NFE2L3	APP	CRCP	PFDN6	FAM125B	AMOTL2	ATP13A3	IGF2BP2	VAV2	MSH3
ov.gse9891	MRPL4	CDC37	FARSA	KRI1	CC2D1A	GCDH	DNM2	TYK2	PIN1	KEAP1	STX10	TRMT1	C19orf53	UBL5	GADD45GIP1	TECR	RAD23A	PRKCSH	EIF3G	NDUFB7	CCDC130	FBXL12	QTRT1	BABAM1	ASNA1	DHPS	SMARCA4	AP1M2	ILF3	YIPF2	TMED1	HOOK2	ECSIT	ILVBL	DNAJB1	MRPL34	PKN1	CDKN2D	MAP1S	CARM1	CACNA1A	PGLS	DDX49	COPE	DNASE2	USE1	RFXANK	LPHN1	SIN3B
ov.tcga	FARSA	MRPL4	RAD23A	CARM1	GCDH	FBXL12	KEAP1	PIN1	TYK2	STX10	ASNA1	CCDC130	EIF3G	CDC37	KRI1	TRMT1	RNASEH2A	ASF1B	TECR	UBL5	ZNF136	ECSIT	TMED1	YIPF2	NDUFB7	DHPS	PKN1	DDX39A	BRD4	DNASE2	BABAM1	SLC35E1	AP1M2	DDX49	C19orf53	DDA1	ILF3	FAM32A	ILVBL	ATP13A1	DNAJB1	MRPL34	ZNF426	QTRT1	PRDX2	HOOK2	SIN3B	DNMT1	STXBP2
Top genes:	UBL5:4	GADD45GIP1:3	NDUFB7:3	PIN1:3	PGLS:3	C19orf53:3	MRPL34:3	KEAP1:3	ILVBL:3	TYK2:3	LMNB1:3	PFDN6:3	NDUFA7:2	ATP5D:2	TIMM13:2	RFXANK:2	NDUFA13:2	USE1:2	COX5B:2	PRDX2:2
12	ID62	6
brca.gse2034	XRCC6	SNRPD3	RBX1	SPECC1L	ADSL	SAMM50	UQCR10	HMGXB4	SNAP29	UFD1L	C22orf28	EIF3D	TMEM184B	NDUFA6	MRPL40	THAP7	CBY1	ATP6V1E1	PMM1	RHBDD3	TST	ST13	EIF3L	BCL2L13	DNAL4	ATF4	CSNK1E	TTLL1	MPST	ABCB6	TRIOBP	CYB5R3
brca.tcga	GCAT	ADM2	PACSIN2	CRELD2	SYNGR1	LIMK2	TBX1	FAM118A	OSBP2	SDF2L1	ARFGAP3	YPEL1	ABCB6	CRYBB2	TCF20	IFT27	TST	MYCL1
coad.gse14333	DYNC1I1	PRSS23	SERPINI1	VLDLR	SORBS2	TUBB2B	NRXN3	KIT	CADM1	MARK1	SNCAIP	PKIA	SCAPER	ME3	ALPK3
coad.tcga	PRSS23	SLC39A2	PTP4A3	APOLD1	ADAMTSL2	CALML3	PAAF1	COMT	VENTX	WNT11	STRA6	SNCAIP	SORBS1	MERTK	STX3	GRHL2	CHKA	FGFR3	TRIL	SLC7A8	TLE2	CTSH	BIN1	PCP4	DHRS3	TRAPPC6A	MARCKS	CNR1	FZD7	PDE3A	RASL11B	RNASET2	TBX4	PLOD2	GLB1L	DIO3	PLIN2	FABP3	WNT6	TYRP1	MLN	PROC	YPEL1	ME3	CCR6	ESRRG	C14orf169	WASF3	RMND5A
ov.gse9891	SNRPD3	UBE2L3	DRG1	PI4KA	MAPK1	ASCC2	UFD1L	BCR	UQCR10	SPECC1L	TUG1	MED15	MRPL40	YWHAH	HIRA	MIF	ATP6V1E1	GAS2L1	PISD	ZNF280B	THOC5	SNAP29	EIF4ENIF1	CECR5	SLC2A11	YPEL1	LIMK2	SLC25A1	CHEK2	C22orf29	NIPSNAP1	GNAZ	GCAT	MICAL3	PRAME	GSTT1
ov.tcga	UBE2L3	EIF4ENIF1	PES1	SMCR7L	TXN2	SLC25A1	JOSD1	MAPK1	BCL2L13	DRG1	PI4KA	UFD1L	SF3A1	SPECC1L	FBXO7	SNAP29	CBY1	HMGXB4	COMT	LIMK2	HIRA	TOMM22	C22orf28	DNAL4	PITPNB	ATP6V1E1	SMARCB1	BCR	YWHAH	UQCR10	MCAT	ZMAT5	MCM5	MICALL1	CECR5	MIF	MPST	PISD	MRPL40	POLR2F	NIPSNAP1	IFT27	GCAT	ADSL	SDF2L1	RBX1	NDUFA6	YPEL1	CBX7
Top genes:	YPEL1:4	SPECC1L:3	UQCR10:3	SNAP29:3	UFD1L:3	MRPL40:3	ATP6V1E1:3	TST:3	GCAT:3	LIMK2:3	SNRPD3:2	RBX1:2	ADSL:2	HMGXB4:2	C22orf28:2	NDUFA6:2	CBY1:2	BCL2L13:2	DNAL4:2	MPST:2
13	ID93	6
brca.gse2034	KLK10	SERPINB2	DLX5	BMP6	SERPINB7	SERPINB3	FGFBP1	TMEM100	NPR3	DYNC1I1	ANGPT1	CYP26B1	MSLN	WISP3	EDN1	VSNL1	KLK11	GLS	KLK12	C1orf116	EDN2
brca.tcga	CLIC3	KREMEN2	AIM1L	IVL	PHLDA2	TMEM40	MNX1	QPRT	C2orf54	EPO	SRPK3	GALE	PTPRH	LHX2	ENTPD2	SLC13A3	PAQR4	MUC5B	S100P	PADI3	SLC22A18AS	HES2	SPAG4	ATP6V0A4	HOXB9	HOXB13	LAGE3	CLTCL1	SPRR3	TRPM2	SLC9A5	TFF2	ASCL2	AQP3	KCTD15	MUC16	SNN	KRT2	NKX2-2	KRT20	AMH	MDK	MC1R	IL11
coad.gse14333	EPS8L1	ANXA2	GPRC5A	KRT19	LAMC2	LAMB3	SLC2A1	GJB3	S100A11	SFN	SCEL	EPHA2	SPRR3	PHLDA2	SPRR1B	KLK10	KRT8	CLIC3	KRT17	SERPINB2	S100A14	SERPINB5	ITGB4	RIPK4	PPP1R13L	SPRR1A	TGFA	ANXA3	KLK6	KRT18	RHOF	PHLDA1	SH2D3A	LIF	ITGA3	KLK7	TTC9	KRT7	KLK8	CAPG	KRT6B	MSLN	CDH3	PLIN3	GNA15	INPP4B	IL18	PLXNB2	STEAP1
coad.tcga	PLK3	MYOF	AHNAK2	EMP1	SERPINB5	SCEL	SPRR3	ABLIM3	ANXA1	ANXA2	KRT19	DUSP1	PHLDA2	EPHA2	SPRR1B	CLCF1	KLK11	KLK10	PLAUR	RHOF	SERPINB2	BHLHE40	KRT33A	FOSL1	KRT8	ZFP36	FOS	TTC9	FOSL2	DCBLD2	ANO1	SFN	JUNB	DSG3	GJB3	CDKN2B	TGFA	MCL1	FGD6	CAPN2	LAMA3	DGKA	PHLDA1	KLK7	WNT7B	CDC42EP2	LAMC2	HBEGF	ITGA3
ov.gse9891	MUC16	CFB	KLK10	KLK7	PDZK1IP1	MUC1	C3	SERPINB1	LCN2	SLC34A2	TM4SF1	KLK11	CP	CAPN1	POLD4	ST3GAL1	FTH1	FRMD4B	TNFAIP2	ZBED2	SLC28A3	ELF3	CARD9	DEFB1	CALHM2	CYBA	DOK5	IFNAR1	IL10RB	C10orf116	MSLN	ASS1	TFAP2C	TREX1	LTC4S	KLK8	SLPI	NPR1	UNC93B1	IFITM2	ACSL5	ARHGAP26	NADSYN1	SCARA3	SLC5A1	CLIC5	KLK6	KCNK15	BCL3
ov.tcga	KLK8	SLC34A2	KLK7	MUC16	MUC1	CP	DHCR24	S100A13	SLPI	CHI3L1	FOLR1	ELF3	ASS1	MSLN	SPON1	RAI2	S100A1	KCNK15	KLK6	BBOX1	KLK10	GPX3	S100A14	MYOF	DOK5	TNFAIP2	DEFB1	HTR3A	CYP4B1	KLK11	VTCN1	EFNA1	RBKS	PLA2G16	ST6GALNAC5	SMARCD3	NUPR1	PIPOX	NMNAT2	WFDC2	CLIC5	HP	ATP6V1B1	S100A4	KLK5	SLCO3A1	VAV3
Top genes:	KLK10:5	MSLN:4	KLK11:4	KLK7:4	SERPINB2:3	PHLDA2:3	SPRR3:3	MUC16:3	KLK6:3	KLK8:3	CLIC3:2	ANXA2:2	KRT19:2	LAMC2:2	GJB3:2	SFN:2	SCEL:2	EPHA2:2	SPRR1B:2	KRT8:2
14	ID8	6
brca.gse2034	KMO	C2orf54	CLCA2	LBP	KYNU	G6PD	AKR1B10	S100A9	S100A8	FGG	FA2H	QPRT	ABCA12	TSPAN8	PNMT	SLC16A2	ACE2	CARD9	FAIM2	CYP2J2	DUSP10	FGB	FHOD1	CEL	ORM1	PAPSS2	POF1B	FGFR4	PRODH	SPRY4	ABCC3	ORM2	TTLL7	CP	ALDH4A1	FABP6	UPK1A	GPRC5C	TRIM36	RNF39	KIAA0513	PPEF1
brca.tcga	FGL1	FABP1	FGB	LIN28A	ITIH2	ASGR1	C4BPB	TTR	FGG	IGFBP1	C4BPA	L1TD1	ACSM3	AMBP	VIL1	PKNOX2	C8B	METTL7A
coad.gse14333	APOA1	AHSG	GC	TF	APOH	FGA	FGG	ALB	VTN	APOA2	ORM2	APOC3	ITIH2	FGL1	FGB	APOB	GPC3	AMBP	PGC	SCG3	RELN	UGT2B4	SCGN	SERPINA4	LIPC	SERPINA7	ASGR1	SNAP25	SERPIND1	LGSN	GLDC	AADAC	PON1	BEX1	C5	PTH2R	CHGB	ORM1	GPR37	CHGA	SST	NEB	ONECUT2	MST1P9
coad.tcga	DLK1	ITIH3	MAL	AHSG	APOA1	HBE1	GDF3	ITIH2	PMEL	DPPA4	HBZ	ITGB7	APOC3	ALAS2	DHRS2	AFP	WISP2	APOA2	SIX6	APOB	FST	EEF1A2	SERPIND1	AMBP	HAMP	SERPINA5	PRAME	LIN28A	ORM2	FGG	RHCE	GATA1	ADAM23	CBS	PLP1	NEFH	CA14	HPR	BARX1	F2	TNNI2	ORM1	MATK	CRLF1	VRTN	OR51E2	NOX5	KCNG1	GAMT
ov.gse9891	TCF21	FOXL2	ATRNL1	STAR	GPRASP1	BAMBI	GATM	KLHDC8A	PEG3	UBXN8	DIRAS3	SCN7A	MAOB	COLEC11	ARHGAP6	HLF	DHRS2	PTPRN2	NR1H4	FDXR	GPM6A	SLC4A4	DLK1	RBMS3	TSPAN8	SESN1	SLC16A4	CIRBP	LEPREL1	HS3ST1	SORBS2	TCEAL1	PGR	CHN2	NR2F2	FHL2	MUM1	MCC	CCDC68	SERPINE2	PGM5	SPG20	CDHR1	ALDH1A1	TCEAL4	DMD	ALLC	SNED1	C17orf48
ov.tcga	TCF21	FOXL2	PEG3	ABCA8	STAR	C7	RASL11B	GPRASP1	GATM	WFDC1	COLEC11	FLRT2	BAMBI	DLK1	PID1	APOD	VWF	NDNF	THBS4	OGN	COL2A1	CPZ	ALDH1A1	LYVE1	HSD11B1	BMP6	WNT5A	SPARCL1	SNED1	TSPAN8	NAV3	ITM2A	MYH11	MGP	CLDN5	CYP11A1	CIRBP	CNN1
Top genes:	FGG:4	TSPAN8:3	FGB:3	ORM1:3	ORM2:3	ITIH2:3	AMBP:3	DLK1:3	FGL1:2	LIN28A:2	ASGR1:2	APOA1:2	AHSG:2	APOA2:2	APOC3:2	APOB:2	SERPIND1:2	DHRS2:2	TCF21:2	FOXL2:2
15	ID17	6
brca.gse2034	MLLT11	TUBA1A	PFN2	LARP6	TUBB2B	PNMAL1	CSPG4	CRLF1	RBP1	PDGFA	HEY1	MSX1	FBXO17	PCDH17
brca.tcga	TMPRSS15	SLC30A10	FGF5	MBL2	NDST3	UGT2A3	RHD	F13B	ZIC3	RAG2	MIA2	ALB	MAGEB3	ROS1	POU6F2	OLIG2	PDE3A	C7orf69	SLCO1B1	LOC441601	SERPINA10	SLCO1B3	CPB2	SEMG1	MGAT4C	CDH12	MYLK3	CRYGB	GUCY2F	CALB1	PRDM14	CRYGC	ADCY8	TAC3	GABRG2	ARG1	CRYBA1	MMP8	CDH9	TRPM1	HTR2C	APOH	GRIA4	GPC5	DGKB	PAGE1	MAGEC3	INSL4	OR3A2
coad.gse14333	CXCL14	AGT	SALL1	F2RL2	TNFSF11	ITGA8	COL4A5	FBN2	TRPA1	COL9A1	TYRP1	BMP5
coad.tcga	GYPE	ZIC3	LOC441601	MS4A3	C1orf114	SLC17A2	ELOVL2	EPHA5	SLC1A6	CDH10	TFAP2B	TMPRSS15	SLC6A15	PEX5L	ERBB4	SH3GL3	CCKBR	AGXT2L1	TPTE	C8A	MBL2	OPRK1	AMHR2	PEG3	MYL1	DDX25	CDH12	LCT	CPB2	MYL7	SLC12A3	ADD2	SLC2A2	CHRNA9	INHA	SLC13A4	TEX15	LRAT	SUSD4	SLC45A2	RORB	C8B	GYPB	APOF	MGAT4C	CRYAA	ONECUT1	NPPB	ANKRD7
ov.gse9891	ZNF423	LRP4	IFT81	C1orf114	TCF7L1	SALL2	PHC1	ZNF711	BEND5	ZNF84	KDM5B	TUBB2B	BEX1	SALL1	DYNC2LI1	DACH1	KIDINS220	ZC4H2	PKIA	UBE2E3	ZNF10	WASF1	COL2A1	PNMAL1	CSRNP3	FAM169A	COL9A3	LRRC49	EXTL2	POGZ	APPL2	FXYD6	SOX11	CHST10	CYTL1	EFNA4	ARNT2	SEMA6A	COL4A6	CBX1	NAP1L1	NME7	UNC119B	TIA1	H2AFY2	COL4A5	HMGA2	FBN2	DDX25
ov.tcga	SALL2	ZNF423	TRO	FXYD6	TCF7L1	LRP4	RHOBTB1	FZD2	COL9A3	SOX11	TUBB2B	PHC1	ZC4H2	EFS	DNMT3A	CYTL1	ITM2C	ZNF167	ARNT2	HMGA2	VASH2	BEND5	PKIA	EFNA4	TMSB15A	CACNA2D2	H2AFY2	PNMAL1	WLS	ARMCX1	IQCA1	DDX25	KIF1A	MPDZ	DACH1	SALL1	TCEA2	SLC22A17	MAGED2	FXYD1	EFNB3	CHST10	DKK3	FBN2	EXTL2	MARCKSL1	MEST	SMARCA1	LGSN
Top genes:	TUBB2B:3	PNMAL1:3	SALL1:3	FBN2:3	DDX25:3	TMPRSS15:2	MBL2:2	ZIC3:2	LOC441601:2	CPB2:2	MGAT4C:2	CDH12:2	COL4A5:2	C1orf114:2	ZNF423:2	LRP4:2	TCF7L1:2	SALL2:2	PHC1:2	BEND5:2
16	ID32	6
brca.gse2034	SLC27A6	SLC15A1	PCSK1N	LY6D	SLC6A15	SCNN1B	CCKBR	ACTL8	DUOX1	GLDC	PCP4	NCAN
brca.tcga	EDN3	PAK7	RNF186	PTN	COL17A1	IL17B	DST	TP63	TCEAL2	SLC27A6	CDH22	DBC1	NPY2R	PAMR1	ACTG2	PIK3C2G	ANGPTL7	KIAA1456	NTRK2	OXTR	NTRK3	LAMC3	CALML3	PACRG	DSC1	PROX1	NR3C2	FAM189A2	KCNB1	ARL4A	KRT15	SNTG2	WISP3	DCX	CRTAC1	NEFH	RIC3	IRX4	LIFR	GNG7	FZD10	SMR3B	TESC	LHX6	ADCYAP1	KRT13	DUSP26	CNR1	CLDN8
coad.gse14333	GUCA2A	CA4	CDHR5	CA1	PBLD	ITM2C	SLC4A4	MS4A12	NR3C2	SCNN1B	AQP8	BTNL3	ZG16	PADI2	CA2	CLCA4	CEACAM7	LRRC19	DHRS11	PLA2G10	SPINK5	XDH	ADH1C	EDN3	CLDN8	GCG	SLC26A2	METTL7A	SEMA6D	CD177	ENTPD5	SLC26A3	NR5A2	ACVRL1	MTM1	SEPP1	TRPM6	AKR1B10	EPB41L4A	SI	NEDD4L	GUCA2B	ATP2A3	SMPDL3A	CHP2	PARM1	BEST2	UGP2	MAOA
coad.tcga	GUCA2B	CLCA4	MS4A12	GUCA2A	CHGA	CA4	CA1	ZG16	AQP8	GCG	SI	ADH1C	CLCA1	DNASE1L3	MADCAM1	SCNN1B	CA2	ADH1B	PYY	FAM55D	FAM5C	NPY1R	CHP2	SST	DHRS9	TEX11	INSL5	SEPP1	BEST2	PLAC8	GBA3	LPHN3	CWH43	CD177	SLC4A4	ADH1A	WNT2B	CLDN8	EDNRB	ADAMDEC1	HPGDS	EDN3	PBLD	SPINK5	GDPD2	MS4A2	TRPM6	CPA3	P2RY14
ov.gse9891	KRT4	KRT5	VGLL1	KRT15	CAMK1D	SERPINB2	KRT13	TFCP2L1	ICAM4	EPB41L1	C2orf54	ASAP3	PYGB	GPR110
ov.tcga	RHOF	ALS2CL	ITGA3	C1orf116	AHNAK2	TGM1	KRT7	TRIM29	ZBED2	LAMC2	C1orf106	SPOCK2	CLDN1	ZNF185	TBC1D2	KRT19	RASAL1	ADAP1	LY6G6C	ALDH3B1	LAMB3	DTX4	KRT4	VGLL1	LAMA3	KLF5	EPB41L1	PTPRU	SDC4	PADI2	CLDN16	CLCF1	ARHGAP29	IL1RAP	PDGFA	KRT15
Top genes:	SCNN1B:3	EDN3:3	KRT15:3	CLDN8:3	SLC27A6:2	NR3C2:2	KRT13:2	GUCA2A:2	CA4:2	CA1:2	PBLD:2	SLC4A4:2	MS4A12:2	AQP8:2	ZG16:2	PADI2:2	CA2:2	CLCA4:2	SPINK5:2	ADH1C:2
17	ID101	6
brca.gse2034	KIAA1199	MMP13	C7orf10	SPP1	MMP1	CD55	CLEC5A	TREM1	WNT2	TNFSF4	MMP3	LMCD1	MICAL2	SPSB1	EPYC	ATP10A	ZNF365	LINC00312	WFDC1	STMN2
brca.tcga	GLRA3	MSMB	CBFA2T3	TFPI2	IGSF1	IL24	IL19	FLT3	OLFM1	MPPED2	CITED1	HPGD	MGAM	DPY19L1	WWC2	FAIM3	CALCR	ANPEP	PTPRR	CACNA2D1	FAM117A
coad.gse14333	MMP3	MMP1	CXCL6	IL24	COL7A1	IL6	CXCL5	WNT5A	IL11	PTGS2	PI15	MMP10	TMEM158	TFPI2	IL13RA2
coad.tcga	FGL1	MSMB	ALDH1A2	ABCA4	INSL4	SHOX2	CPS1	SLC16A7	TLL2	NEFL	DAZL	MTUS2	CETP	SIX1	INA	AKAP5	PIP	NRN1
ov.gse9891	PVRL3	GRIA2	EFNB2	MEOX1	CTNNA2	ERBB4	ATP7B	MPPED2	LPHN2	TSPAN7	EPB41L5	MECOM	PNOC	FZD5	SEMA6D	PELI2	TOX	MC4R	THRB	GPC5
ov.tcga	IGFBP2	APOA1	BMP7	PCP4	EFNB2	TM7SF2	PRAME	PVRL3	TSPYL5	NTF3	CTNNA2	LPHN2	SLC12A1
Top genes:	MMP1:2	MMP3:2	MSMB:2	TFPI2:2	IL24:2	MPPED2:2	PVRL3:2	EFNB2:2	CTNNA2:2	LPHN2:2	KIAA1199:1	MMP13:1	C7orf10:1	SPP1:1	CD55:1	CLEC5A:1	TREM1:1	WNT2:1	TNFSF4:1	LMCD1:1
18	ID24	6
brca.gse2034	HGS	FOXK2	DUS1L	NARF	CSNK1D	NPLOC4	C17orf70	WDR45L	TBCD	SLC25A10	MRPL12	MAFG	SIRT7	PYCR1	ASPSCR1	FN3KRP	JMJD6	NSDHL	AZI1	PCYT2	C17orf62	DDX39A	PGS1	FAM50A	FAM127B	RFNG	EBP	NAA10	NAT9	HSD17B10	MAP1S	USP36	GDI1	CLASP1	GTF2H4	SNRNP200	CARM1	SETD5	B3GNTL1	GAA	TRMT1	PLXNA3	FAM127A	SLC38A10	SGSH	VGLL4	SEMA4C	NDUFB11	JAG2
brca.tcga	KIAA0319	HSF2BP	LSS	PRDX1	DDIT3	MAPK8IP3	SLC6A9	ZNF323	ITPR3	NUP210	PLP2
coad.gse14333	NSDHL	VBP1	PHF16	UBE2A	UTP14A	RNF113A	LAS1L	HCCS	RBBP7	HAUS7	PRDX4	POLA1	BRCC3	NDUFB11	HSD17B10	DKC1	CCDC22	TIMM17B	C1GALT1C1	BCAP31	PDHA1	PGRMC1	SLC25A5	SMS	CTPS2	THOC2	ABCB7	STAG2	PQBP1	RAP2C	UPF3B	MED14	GLA	PIGA	NONO	IRAK1	FMR1	CASK	EBP	RP2	ARMCX5	HPRT1	SLC10A3	UBQLN2	MTMR1	AIFM1	AMMECR1	LAMP2	LAGE3
coad.tcga	ASB9	CXorf56	SSR4	TMLHE	IGBP1	SLC25A5	TAF9B	VBP1	RRAGB	MOSPD1	CCDC22	TIMM17B	ATG4A	PLP2	ARMCX6	NAA11	NXT2	ARMCX3	GEMIN8	LAGE3	ARMCX5	SCML1	TCEAL1	RPL39	MAGED2	DYNLT3	CETN2	CTPS2	MOSPD2	ATP7A	TMEM187	ACSL4	NUP62CL	PCTP	PRPS2	ZNF673	TCEAL4	RBM3	EBP	PRPS1L1	GLA	SH3BGRL	CLCN5	WBP5	PIR	PRRG1	PJA1	IL13RA1	ARAF
ov.gse9891	WDR13	TIMM17B	FTSJ1	PQBP1	SUV39H1	SLC35A2	CCDC22	GPKOW	PRAF2	NDUFB11	ARAF	UBA1	WDR45	UXT	CDK16	KCND1	PRICKLE3	EBP	PHF16	USP11	MAGED1	PORCN	RRAGB	ZNF673	UBQLN2	RBM3	WBP5	FGD1	PLP2	PCSK1N	NGFRAP1	MAGED2	ARMCX2	NUDT11	GSPT2	ARMCX6	BEX4	PJA1	MAGEH1	TRO	EML1	ARMCX5	SAP30
ov.tcga	CCDC22	GPKOW	FTSJ1	TIMM17B	WDR45	NDUFB11	WDR13	ARAF	EBP	PQBP1	CDK16	SUV39H1	PRAF2	UXT	ZNF673	PLP2	RP2	UBA1	USP11	PHF16	HSD17B10	RBM10	CLCN5	PORCN
Top genes:	EBP:5	NDUFB11:4	PLP2:4	CCDC22:4	TIMM17B:4	HSD17B10:3	PHF16:3	PQBP1:3	ARMCX5:3	ZNF673:3	ARAF:3	NSDHL:2	VBP1:2	SLC25A5:2	CTPS2:2	GLA:2	RP2:2	UBQLN2:2	LAGE3:2	RRAGB:2
19	ID82	6
brca.gse2034	RAD23B	FAM206A	C9orf91	PSMD5	TJP2	PSMB7	BRD3	IARS	TXN	FBXW2	PPP6C	EPB41L4B	NAA35	NANS	MRPS2	ZNF189	PTPN3	NDUFA8	UBAC1	NOL8	BSPRY	TDRD7	RFK	TOR1B	RABEPK	RABGAP1	ZCCHC6	RMI1	TSC1	EDF1	SURF1	ARPC5L	CAMTA1	DDAH1
brca.tcga	ABHD3	DCAF10	GDF9	SGCG	NANS	AKAP5	CORO2A	USP14	SUB1	TRIM14	MARCH3	MANBA	CASP6
coad.gse14333	CKB	PPARG	FAM13A	AKAP7	SLC38A4	HMGCS2	HAVCR1	REN	SLC11A2	SGK2	SPAG4	NETO2	KIAA0319
coad.tcga	CKB	ENTPD5	ERI2	MTL5	PPARG	SLC38A4	AKAP7	TDP2	CYP2J2	PADI2	THSD4	PLCE1	ACSM3	EGF	CASP6	REN	CD320	ACOT13	NDRG2	ZNF552	FXYD3	EDN2	IFT74	PLBD1	MPZL2	LGALS3	PEX11A	KAZALD1	ACAA2	HADH	FAM13A	MFAP3L	VSX1	PCK2	C9orf40	ABHD6	CTH	SLC11A2	PPFIA3	PRLR	TUBAL3	TOR1B	KIAA0319	FHIT	ALPK3	TRHDE	DUOX1	BSPRY	GALK2
ov.gse9891	TXN	ATP6V1G1	HSDL2	NDUFA8	PRPF4	KIAA0368	MRPS2	ARPC5L	CORO2A	POLE3	PHF2	RABGAP1	SEC16A	FKTN	HDHD3	ZNF189	NANS	PTPN3	TTF1	UBAC1	NOL8	SLC35D2	INVS	RFK	RALGDS	BRD3	ANAPC2	COQ4	CIZ1	BSPRY	CDK5RAP2	FAM102A	ABL1	NAA35	ODF2	ISCA1	SLC31A1	SH3GLB2	MED22	RABEPK	SECISBP2	DENND1A	STXBP1	DNM1	AGPAT2	AUH	INPP5E	FAM120A	TEX10
ov.tcga	GAPVD1	HCCS	NAA35	POLE3	TRIM32	TOR1A	RAD23B	PRPF4	DOLK	TOR1B	UBAP1	NSDHL	SMC2	PPP6C	DPM2	HDHD3	DENND4C	RC3H2	FBXW2	HSDL2	SLC31A1	TDRD7	EXOSC2	ZNF189	APTX	VCP	SPTLC1	MRPS2	SETX	CDK9	XPA	ACO1	BSPRY	BRCC3	FAM102A	ZFAND5	TXN	NOL8	CORO2A	PLAA	PTPN3	ANAPC2	NDUFA8	UBAC1	RAB9A	ISCA1	NANS	CREB3	FUBP3
Top genes:	NANS:4	BSPRY:4	TXN:3	NAA35:3	MRPS2:3	ZNF189:3	PTPN3:3	NDUFA8:3	UBAC1:3	NOL8:3	TOR1B:3	CORO2A:3	RAD23B:2	BRD3:2	FBXW2:2	PPP6C:2	TDRD7:2	RFK:2	RABEPK:2	RABGAP1:2
20	ID7	6
brca.gse2034	CSN3	CSN1S1	SMR3B	LALBA	SCARA3	PROL1	PHLDA1	NCALD	CLU	EYA1	FGF9
brca.tcga	SLC38A3	HOXD13	CLDN6	GYPB	ARHGDIG	ABCG5	TERT	CNNM1	GBX2	PARVB	TKT	MAPK12	CYP24A1	GAGE1	FAM163A	FOXA2	HHIPL2	HOXD11	PAEP	SAGE1	HOXA11	LPCAT1	POU4F3	TDRD1	GJA3	RAP1GAP2	ACSBG1
coad.gse14333	DSPP	HAMP	AGER	SPAG8	MAG	F7	OR10H1	LILRA4	GBX2	KCNF1	PHF7	SCT	TRPV4	P2RX3	CDR1	MORN1	POU4F3	TNXB	MAP1LC3C	NKX6-1	HTR1E	KRT3	CDK5R2	CYP46A1	CHRNA2	MAP1S	ONECUT1	ABO	BIRC7	NCAN	SLC2A6	PROP1	MYH13	CCL27	BAI1	CYP4F8	C11orf10	SLC8A2	CD226	GHRH	TUT1	UBTD1	LILRB5	VRTN	SNCA	FCN2	S100G	BARX2	HIST1H1A
coad.tcga	HOXA5	HOXA7	HOXA2	HOXA3	HOXA4	HOXA10	HOXA6	SKAP2	HOXA11	HOXA1
ov.gse9891	HOXA7	GATA3	HOXA1	EYA1	HOXD11	HOXD10	HOXA10	HOXA2	HOXA5	HDC	CLDN8	HOXA3	HTR2B	SLCO1C1	HOXA4	ALDH4A1	DNM3	SKAP2	NEFL	GFRA1	FOXG1	LRRN3	SPRR1A	SIM2	HOXD9
ov.tcga	NPR1	CLU	BHLHE41	GAS6	AHNAK	BCL6	PLSCR4	SCARA3	ST5	MICAL3	COBL	ANKRD6	MLPH	CECR1	SSPN	EPHB6	LTC4S	NFIX	RAB17	MYO5C	GLDC	FAM107A	PELI2	SLC27A3	NR3C2	GATA6	ERBB4	SPEG
Top genes:	SCARA3:2	CLU:2	EYA1:2	GBX2:2	HOXD11:2	HOXA11:2	POU4F3:2	HOXA5:2	HOXA7:2	HOXA2:2	HOXA3:2	HOXA4:2	HOXA10:2	SKAP2:2	HOXA1:2	CSN3:1	CSN1S1:1	SMR3B:1	LALBA:1	PROL1:1
21	ID22	6
brca.gse2034	CEACAM6	CEACAM5	LRRC31	S100P	ECM1	AQP3	GNA14	ENTPD3	CRYM	NAT2
brca.tcga	DNASE1	ZG16	GDPD3	ADRA2C	CAMK2N1	OTOR	ABP1	KRT24	RHBG	AMIGO2	RFX2	TCL1B	DUSP13	CACNA1H	NPC1L1	TPPP3	CELF3	CTNND2	CXCR7	DHRS2	LGI1	EPS8	PVALB	SLC38A1	SMAD3	DNASE1L2	BDKRB1	CACNB4	SNCG	CAMP	BDKRB2	NAT8	PTPN13	CXXC4	PIK3C2B	OSR2	GDPD2	CARD14	C18orf1	MAPK10	SOCS2	CEMP1	TMPRSS4	NUAK2	PPP1R14D	CXCR1
coad.gse14333	SLC35A3	BDH1	TMPRSS2	PDCD6IP	DNAJC16	ATP2C2	GALNT7	DOPEY2	CMAS	ATP8B1	DOK4	CDS1	ESRP2	PPM1B	CPT2	RSBN1	PTPRF	ATP5F1	TGFBRAP1	SUCLG2	DNMBP	SLC35D1	SMG1	COG7	NIPAL3	MECOM	PDXDC1	DYNC1LI2	VPS33A	CYP2J2	CAPN5	PCSK7	PPARA	CNNM4	CLDN3	CALM1	ANO10	DNAJB14	ST14	PRR13	VDR	TMEM57	ASTE1	PRRG2	EPS8L3	UGT8	SF3B1	AHCYL1	CLCN3
coad.tcga	MEP1A	CEACAM5	USH1C	MYO1A	PRSS8	ATP10B	CDHR5	SLC44A4	CXCL14	RNF186	MMP15	SLC5A1	IHH	GUCY2C	CLDN3	PPP1R14D	ABP1	SMPD3	HMGCS2	CEACAM6	TJP3	HEPH	CEACAM1	TM4SF5	APOBR	BTNL3	SLC26A3	CEACAM7	GPA33	NOX1	TMPRSS2	CALML4	CDH17	KBTBD11	GPX2	SPINK1	CYP3A5	ARL14	APOBEC1	FABP1	TMPRSS4	CFTR	PSG6	LRRC19	FZD5	TST	TOX3	PRR15L	PDZD3
ov.gse9891	CDH17	LGALS4	MEP1A	MUC13	EPS8L3	SPINK1	FABP1	GPX2	USH1C	TFF1	HMGCS2	HSD17B2	ADH1C	SI	ARL14	ANXA10	ARSE	ACE2	DDC	RNF128	CEACAM5	ZG16	APOM	AHSG	AGT	NR5A2	S100P	CHP2	POF1B	TMPRSS2	CLCA1	ANXA13	DPEP1	TF	CPS1	UNC93A	CEACAM6	AKR1B10	CEACAM1	PIGZ	KCNMB1	ABP1	HPD	C4orf19
ov.tcga	MSMB	HSD17B2	SPRR3	GPX2	KRT20	LY6D	ADH1C	SPRR1A	TFF1	KRT13	GATA3	SPINK1	RNF128	PPARG	FA2H	KIT	HMGCS2	SIDT1	UPK1A	DHRS2	CHP2	CYP24A1	GAS2	TESC	ADORA2B	TBX3	MAN1C1	PLA2G2A	LYPD3	CNGA1	SPRR1B	PTPRR	SERPINB5	PIP	SLC27A2	CMAHP	TOX3	AQP3	CTSE	ZNF750	VILL	SCUBE2
Top genes:	CEACAM6:3	CEACAM5:3	ABP1:3	TMPRSS2:3	HMGCS2:3	GPX2:3	SPINK1:3	S100P:2	AQP3:2	ZG16:2	DHRS2:2	TMPRSS4:2	PPP1R14D:2	CLDN3:2	EPS8L3:2	MEP1A:2	USH1C:2	CEACAM1:2	CDH17:2	ARL14:2
22	ID187	6
brca.gse2034	LSR	EPHB3	GPR56	EPCAM	PLEKHB1	DHCR7	RNF24	SLC6A8	TFAP2C	PDK3	ELF3	MMP15	AQP5	LRP5	CHKA	OBSL1	SLC5A1	SOX9	USP13	GALNT14	CEACAM1	MUC5B	PEX13
brca.tcga	TRPV4	EXTL1	PYGB	SCARB1	LRFN4	PLEKHB1	SPEG	LRP5	MOG	COBL	ST3GAL4	PC	AQP6	CLCN2	SLC6A8	STIM1	PARD3	CHKA
coad.gse14333	LEFTY1	PLEKHB1	CAPN6	APIP	PROM1	SOSTDC1	SHANK2	SATB1	GDPD5	LRRC36
coad.tcga	PLEKHB1	CAPN6	TESC	KCNN4	SH3TC2	KRT6B	SH3BP4	SATB1	SEC14L4	EDAR	FRY	LGR5	SPTBN5	TMPRSS5	BFSP1	CLDN1	ARAP3	IL17RB	SLC14A1	SMPX	CELSR1	IGF1R	CAPN3	CHPT1	TGFBR3
ov.gse9891	MATN3	SH3BP4	TRIL	IRS1	FOXF2	BMP4	RND3	SLC2A10	ZFHX3	CDC42EP3	GPC1	LSAMP	SNAI1	BMP2	PLK2	CRYM	COL7A1	WNT11	EFHD1	PDGFA	PENK	EIF5A2	FZD7	SKI	AMOTL2	CCND1	CLIC3	FGF9	CXCR7	FZD10	RIN2	SLC26A10	SIX1	KERA	SEMA5A	CDK6	IQCA1	LTBP1	TNNC1	WFDC1	GLTP	TSPAN2	IGF1R	PCYOX1	ARL4C
ov.tcga	GPR64	SH3BP4	FZD10	CCND1	PODXL	IRS1	ST6GALNAC2	ARL4D	MXRA7	EDAR
Top genes:	PLEKHB1:4	SH3BP4:3	SLC6A8:2	LRP5:2	CHKA:2	CAPN6:2	SATB1:2	EDAR:2	IGF1R:2	IRS1:2	CCND1:2	FZD10:2	LSR:1	EPHB3:1	GPR56:1	EPCAM:1	DHCR7:1	RNF24:1	TFAP2C:1	PDK3:1
23	ID45	5
brca.gse2034	PSMC5	TACO1	PTRH2	LRRC59	RAD51C	SUPT4H1	FTSJ3	CCDC47	MTMR4	UTP18	ICT1	RPS6KB1	ATP5H	TRIM37	SLC35B1	CLTC	SMARCD2	DHX40	DDX42	NUP85	PSMD12	APPBP2	SMG8	VEZF1	PPM1D	NOL11	AMZ2	MED13	KPNA2	HEATR6	ACOX1	LUC7L3	PHB	BPTF	COIL	RSAD1	UBE2Z	SNF8	TEX2	H3F3B	HN1	XYLT2	EIF4A3	EPN3	MRPS7	VMP1	COX11	DDX5	SRSF2
brca.tcga	CYB561	SLC9A3R1	TACO1	CLTC	EPN3	HIST1H4H	USP32	HIST1H2BM	HIST1H2BL	HIST1H1E	HIST1H2AB	HIST1H2AK	HIST1H1C	TOB1	HIST1H2AM	HIST1H2BO	HEATR6	HIST1H2BD	APPBP2	HIST2H2BE	PSMC5	SPATA20	HIST1H2BB	PTRH2	HIST1H2BG	SLC35B1	USP6	PSMD3	PHB	LLGL2	RPS6KB1	ANKRD40	STARD3	SUPT4H1	MRPS7	CANT1	HIST1H3B	HIST1H2AL	PRKAR1A	HIST1H2BJ	FTSJ3	XYLT2	SMG8	VMP1	HIST1H3D	PGAP3	RAD51C	TUBD1	TRIM37
coad.gse14333	null
coad.tcga	TCTN1	DNAH7	EXTL2	NEK11	TBC1D19	NME7	IFT27	ZNF214	ZMYM1	DHX40	LRRC48	IQCH	ERMAP	HSPB11	WDR96	SPATA6	WDR78	TSGA10	WDR5B	IQCK	OSGEPL1	DLEC1	TTLL1	VMP1	COIL
ov.gse9891	ICT1	MRPS7	NUP85	NARF	C17orf62	CCDC47	PPM1D	PTRH2	H3F3B	HGS	ACOX1	MRPL12	TEX2	SMARCD2	MTMR4	WBP2	PRKAR1A	GPS1	RPS6KB1	WDR45L	COIL	SUPT4H1	DDX42	LLGL2	SMG8	POLG2	RAD51C	SMURF2	CDR2L	FN3KRP	APPBP2	P4HB	TUBD1	HEATR6	PSMD12	DHX40	CASKIN2	LRRC59	SYNGR2	CDC42EP4	TMC6	COX11	SLC35B1	GAA	HN1	RHBDF2	HELZ	EVPL	ASPSCR1
ov.tcga	PSMD12	RPS6KB1	PRPSAP1	NOL11	TLK2	NUP85	DCAF7	FTSJ3	PSMC5	SAP30BP	MRPS7	AMZ2	TACO1	TRIM37	NPLOC4	CANT1	PTRH2	HELZ	MTMR4	SPOP	LRRC59	ICT1	SMURF2	COIL	SMG8	MED13	PRKAR1A	ACOX1	SLC35B1	POLG2	WBP2	SMARCD2	SUPT4H1	PPM1D	SNF8	PHB	C17orf101	HEATR6	H3F3B	VEZF1	SIRT7	GPS1	NARF	DHX40	UBE2Z	WDR45L	APPBP2	RAD51C	PGS1
Top genes:	PTRH2:4	RAD51C:4	SUPT4H1:4	RPS6KB1:4	SLC35B1:4	DHX40:4	APPBP2:4	SMG8:4	HEATR6:4	COIL:4	MRPS7:4	PSMC5:3	TACO1:3	LRRC59:3	FTSJ3:3	MTMR4:3	ICT1:3	TRIM37:3	SMARCD2:3	NUP85:3
24	ID25	5
brca.gse2034	SNRNP25	ECI1	C20orf11	HAGH	NTHL1	METTL22	POLR3K	CDIPT	NDUFAB1	E4F1	CSE1L	C16orf53	LCMT1	NAA60	DNAJA3	YTHDF1	ERI2	UBFD1	RAE1	DCTPP1	RRN3	RAB22A	VPS37C	TRMT112	PARN	TBL3	ARFGEF2	POLR3E	ARL6IP1	NFS1	STAU1	RBBP7	UBE2I	TCFL5	C20orf20	C11orf48	DYNLRB1	COX8A	SLMO2	SCAND1	C16orf42	SPATA2	MRPL49	MKL2	TMEM106C	DPM1	LYRM1	REPS2	MGRN1
brca.tcga	null
coad.gse14333	STAU1	YWHAB	PROSER1	GTF2IRD1	PLAGL2	YTHDF1	RNF114	DYNLRB1	ADNP	NCOA6	RALY	SPATA2	TM9SF4	EIF6	C20orf11	PSMA7	RPIA	ACOT8	NUFIP1	NEK3	ARFGEF2	MOCS3	C20orf111	DPM1	ERGIC3	UCHL3	PRPF6	ASXL1	UQCC	TSPAN6	PPP1R3D	SERINC3	SLC5A6	TAF4	ASCL2	ATP9A	KIAA1704	TOMM34	STK4	ADRM1	DDX27	KIF3B	CTNNBL1	GTF2F2	TTI1	CDK5RAP1	POFUT1	EIF2S2	EIF3B
coad.tcga	ATP9A	PLAGL2	DIDO1	DDX27	ENGASE	FARP1	KIAA0226L	YTHDF1	TAF4	POFUT1	STAU1	SLC5A6	PPP1R3D	ZMYND8	C20orf4	TCF7	NEK3	VAV3	TM9SF4	PRPF6	SLC19A3	YWHAB	SERINC3	EPM2AIP1	NCOA6	LRRC2	ASCL2	KIF3B	ASXL1	STX16	UPF3A	L3MBTL1	MLH1	DSCR6	DYNLRB1	EIF6	TUG1	ABAT	GTF2IRD1	LRRC36	TGOLN2	RALGAPB	GABRE	C20orf43	NFS1	ROCK2	ERGIC3	TSPAN6	EPB41L1
ov.gse9891	NTHL1	UBE2I	TSC2	FAM173A	ECI1	SOLH	IFT140	RRN3	TRAP1	IQCK	HCFC1R1	DEXI	UQCRC2	METTL9	COG7	UBFD1	C16orf62	POLR3K	LUC7L	CLUAP1	NME4	RSL1D1	CARHSP1	THUMPD1	METRN	SNRNP25	LYRM1	ROGDI	ABCC1	METTL22	PMM2	NAGPA	RAB26	SYNGR3
ov.tcga	MLST8	TMEM186	DNAJA3	MRPL28	PARN	RNF40	POLR3E	PMM2	PPP4C	COG7	KCTD5	MGRN1	ZC3H7A	MKL2	NUBP1	THUMPD1	BFAR	HAGH	NTHL1	PALB2	METTL22	ROGDI	UBFD1	TSC2	IQCK	KIAA0430	COQ7	UBN1	POLR3K	THOC6	DECR2	STX4	HCFC1R1	ECI1	NFATC2IP	ERI2	TMEM8A	NAGPA	HIRIP3	GSPT1	DEXI	DCTN5	PDXDC1	CLN3	C16orf62	QPRT	SEPHS2	TRAP1	CCP110
Top genes:	ECI1:3	NTHL1:3	METTL22:3	POLR3K:3	YTHDF1:3	UBFD1:3	STAU1:3	DYNLRB1:3	SNRNP25:2	C20orf11:2	HAGH:2	DNAJA3:2	ERI2:2	RRN3:2	PARN:2	ARFGEF2:2	POLR3E:2	NFS1:2	UBE2I:2	SPATA2:2
25	ID41	5
brca.gse2034	UBE2S	MCM7	EIF3B	CDT1	MLF2	TUBB	PRMT1	HNRNPAB	DHTKD1	H2AFX	ELAVL1	KCTD5	BAG6	TH1L	LSM2	DNAJB1	NOC2L	NCAPD2	CDK16	MRTO4	KDM1A	SNRPA	POLD2	WBP11	SRM	CMAS	NOP16	NUP62	WBSCR22	POLD1	PHB2	LTBR	CSNK2B	SOLH	ACOT7	ATF5	CARHSP1	EMG1	APEX2	SLC4A2	NOP2	TPD52L2	FKBP4	THOC6	DFFA	NPM1	EIF6	DDX41	UBA1
brca.tcga	ANP32C	ANP32D	CLASRP	CLSTN3	PRPS1	PRPF19	ENSA	DNAJC7	HNRNPAB	PRPS1L1	CARHSP1	APAF1	ANXA6	TNKS2	RNF146	HIRA	PFKFB3	AGPS
coad.gse14333	TMEM9B	TMEM59	IL10RB	EML2	VAMP8	RHOC	MGST3	SLC25A24	CD58	SH3BGRL3	CANT1	CLTB	TMEM30B	LGR4	SYNGR2	COQ10B	DENND2D	TSPAN15	TM2D1	CTSS	CD9	ICAM3	TNFSF10	VAMP4	C12orf4	CCR6
coad.tcga	null
ov.gse9891	DDX47	EMG1	WBP11	STRAP	NOP2	LRP6	NECAP1	ADIPOR2	TULP3	NDUFA9	ETNK1	M6PR	KDM5A	KIAA0528	C12orf4	PHB2	ING4	ITFG2	CMAS	MED21	MLF2	LDHB	GOLT1B	COPS7A	RAD52	KRAS	TM7SF3	MRPS35	RECQL	DNM1L	ERGIC2	LPCAT3	DERA	PLEKHA5	WNK1	C12orf5	ERC1	CCDC91	DYRK4	STK38L	FAM60A	HEBP1	IPO8	PEX5	PARP11	SLCO1A2	PYROXD1	ARNTL2	CD9
ov.tcga	WBP11	NECAP1	STRAP	M6PR	MED21	FKBP4	DDX47	ADIPOR2	TULP3	RECQL	CMAS	EMG1	ERGIC2	C12orf4	PYROXD1	COPS7A	ING4	MRPS35	C12orf5	PLEKHA5	CCDC91	DERA	NDUFA9	MAGOHB	DYRK4	HEBP1	ETNK1	LTBR	NOP2	CREBL2	KRAS	KDM5A	KIAA0528	PHB2	CDKN1B	STK38L	GOLT1B	DNM1L	LRP6	ERC1	PLEKHG6	WNK1	TEAD4	TM7SF3	FOXJ2	PTPN6	GPR19	ARNTL2	MANSC1
Top genes:	WBP11:3	CMAS:3	PHB2:3	EMG1:3	NOP2:3	C12orf4:3	MLF2:2	HNRNPAB:2	LTBR:2	CARHSP1:2	FKBP4:2	CD9:2	DDX47:2	STRAP:2	LRP6:2	NECAP1:2	ADIPOR2:2	TULP3:2	NDUFA9:2	ETNK1:2
26	ID121	5
brca.gse2034	ARHGDIB	CFB	TNFSF10	GLRX	LTF	ZNF238	PDLIM1	PYCARD	CAPN2	GOLM1	MGP	LGALS3	TACSTD2	PRKCH	RNASET2	PARP8
brca.tcga	null
coad.gse14333	LCN2	ZC3H12A	CXCL3	CXCL1	PDZK1IP1	NOS2	CXCL2	CFB	PI3	CCL20	DUOX2	TPK1	CASP1	TRIM15	TMC5	SOCS1	COL9A2	SLC6A14	ASS1	MXD1	SLPI	RND1	SAT1	MAP2K3	AVPI1
coad.tcga	ZC3H12A	CXCL2	CXCL1	CXCL3	CCL20	MAP3K8	CFB	CEBPD	C2	RTEL1	TGM2	IFITM2	IL22	IFITM3	IKBKE	IL26	IFITM1	CEBPE	CXCR3	IL12A	IL32	CD40LG	DEFA4	IL12B
ov.gse9891	DHRS3	SYBU	PIGR	C4BPA	CRISP3	VPS13D	PIP	LTF	GMDS	DMBT1	CHPT1	IL12A	NXF3	DAPK2	SPDEF	KIAA1324	CKMT2	BAG1	CATSPERB	TCN1	VWA5A	FOXC1	NUDT2	AZGP1	PITX1	CRISP2
ov.tcga	IL8	CCL20	CXCL3	CXCL1	CXCL2	TNFAIP3	ZC3H12A	BIRC3	NFKBIA	TNF	CXCL5	CXCL6	PI3	VNN1	CHI3L2	VNN3	ORM1	PTX3	MAP3K8	VNN2	ORM2	SLC19A3
Top genes:	CFB:3	ZC3H12A:3	CXCL3:3	CXCL1:3	CXCL2:3	CCL20:3	LTF:2	PI3:2	MAP3K8:2	IL12A:2	ARHGDIB:1	TNFSF10:1	GLRX:1	ZNF238:1	PDLIM1:1	PYCARD:1	CAPN2:1	GOLM1:1	MGP:1	LGALS3:1
27	ID162	5
brca.gse2034	NDUFS8	CORO1B	CDK2AP2	DRAP1	NDUFV1	C11orf80	LRFN4	SART1	TMEM134	SLC29A2	RHOD	PC	SPTBN2
brca.tcga	RASSF7	PKP3	EPS8L2	PRSS22	CD151	PNPLA2	CLDN3	ABHD11	PRSS8	CLDN4	HRAS	ELF3	FUT2	SH2D3A	PPAP2C	ATHL1	INSR	STAP2
coad.gse14333	null
coad.tcga	ID3	ID1	RTN4	SMAD7	ID4	MSX2	ID2	CDS1	C11orf80	ARL4A	RCAN3	MSX1	CLOCK
ov.gse9891	STXBP2	RAB1B	ATP5D	SIGIRR	SH2D3A	PKP3	EPS8L2	DGKZ	RASSF7	TPRA1	XAB2	HRAS	MAP2K2	NDUFS8	CTSD	AES	UBXN6	SLC22A18	C11orf2	CDK2AP2	PITPNM1	NDUFV1	TRIP10	NFIC	CD81	PNPLA6	CD151	HMG20B	MACROD1	BAD	YIF1A	BTBD2	DEAF1	C11orf80	MRPL23	NDUFS7	BANF1	GSTP1	TAF10	SSSCA1	GTF2F1	NPTXR	LRRC8E	LRP5	LPCAT4	DPP3	GNA11	TP53I11	FJX1
ov.tcga	SH3GL1	AES	AP3D1	STAP2	TICAM1	MKNK2	SF3A2	PLIN3	SCAMP4	NFIC	C19orf10	TLE2
Top genes:	C11orf80:3	NDUFS8:2	CDK2AP2:2	NDUFV1:2	RASSF7:2	PKP3:2	EPS8L2:2	CD151:2	HRAS:2	SH2D3A:2	STAP2:2	AES:2	NFIC:2	CORO1B:1	DRAP1:1	LRFN4:1	SART1:1	TMEM134:1	SLC29A2:1	RHOD:1
28	ID163	5
brca.gse2034	null
brca.tcga	ABCC3	GUCY1A2	ITGB6	SPRY4	S100A14	DUSP6	FRK	MGAT4A	PRODH	ST3GAL5	RNF39	GRIA3	SPTSSA
coad.gse14333	TFF2	TMPRSS3	ANXA10	F5	TM4SF1	PLA2G16	NT5E	MIA	TESC	PON3	DPP4	PIWIL1	AQP5	CLCN4	PON2	CDKN2A	TNFRSF21	ITGB8
coad.tcga	SLC7A11	TMPRSS3	SOX13	VSNL1	STXBP1	CLCN4	MORC4	SPRY4	B4GALT6	TENC1	PHKA1	GUCA1B	SNED1	KDM6B
ov.gse9891	SPRY4	DUSP6	TRIB2	SPRY2	ETV4	FGF18	MMD	WNT7A	SPRY1	LRRC32	UPK1B	TMEM100	ETV5	ASAP2	PCTP	PDE9A	PHLDA3	HES1	DAAM2	BCAT1	EHD3	SCEL	SGPL1	PHLDA1	AQP5	ADAM28	SEMA3A	GTF2IRD1	TSKU	GALNT6	RGS17	INHBB	CADM1	SEC14L1	PLXNA2	MEGF6	ZYX	POPDC3	RNF144A	SATB1	DNAJC12	ZHX2	GJA5	EPHA1	SPSB1	HIP1	S100A4	PCBP4	MYOM1
ov.tcga	SPRY4	SPRY2	ETV5	DUSP6	ETV4	SPRY1	TRIB2	DUSP4	MMD	TMEM100	PHLDA1	MMP10	ASAP2	BCAT1	SEC14L1	DAAM2	LRIG1	SLC14A1	CAMK2N1	PCTP	CADM1	ADAM28	C16orf45	SERPINE2	CSRP1	ACOX2	RNF24	BDNF	ARSJ	MTMR11	CLIP2
Top genes:	SPRY4:4	DUSP6:3	TMPRSS3:2	AQP5:2	CLCN4:2	TRIB2:2	SPRY2:2	ETV4:2	MMD:2	SPRY1:2	TMEM100:2	ETV5:2	ASAP2:2	PCTP:2	DAAM2:2	BCAT1:2	PHLDA1:2	ADAM28:2	CADM1:2	SEC14L1:2
29	ID77	5
brca.gse2034	C1orf27	JTB	DAP3	HEATR1	FBXO28	ANGEL2	RPS6KC1	NUP133	HAX1	UBE2Q1	RAB4A	TMCO1	SF3B4	PEX11B	YY1AP1	TFB2M	METTL13	IARS2	TBCE	TOMM20	UFC1	MRPL9	FLAD1	BOLA1	POGK	GNPAT	KDM5B	SDHC	TROVE2	GGPS1	VPS72	RCOR3	VPS45	NDUFS2	LAMTOR2	NCSTN	UAP1	MTX1	FAM20B	IPO9	DCAF6	ISG20L2	PRCC	PARP1	PMVK	PMF1	DIEXF	TSNAX	SCAMP3
brca.tcga	MRPL24	DCAF6	DARS2	EDEM3	GOLPH3L	C1orf9	SLC50A1	BRP44	LPGAT1	CYP2C8	TUFT1	BOLA1	RUSC1	GPATCH2	BDH1	GK	HABP2
coad.gse14333	null
coad.tcga	UFC1	LPAR6	GPATCH2	ZNF280D	KIFAP3	TAF1A	TTC13	ENPP4	C1orf9	DARS2	SMYD3	MTHFD2L	SLC19A2	TMCO1	BAZ2B	ZNF669	LEPR	SCCPDH	SUPT3H	ZNF124	GLS
ov.gse9891	TAF1A	PARP1	TBCE	TP53BP2	DUSP12	TSNAX	POGK	URB2	USP21	TFB2M	VPS72	PRUNE	PBX1	RRP15	CHML	ADSS	DIEXF	KIAA0907	TARBP1	ANGEL2	WDR12	PRCC	ILF2	HAT1	RCOR3	ZNF692	OSGEPL1	TTC13	ORC2	TOMM20	GGPS1	MTR	RPS6KC1	SF3B4	BCL9	CNIH4	INTS7	VPS45	LBR	PRPF3	FH	BOLA1	DNAJC10	TDRKH	PMS1	KCTD3	HIBCH	MTX2	RNF115
ov.tcga	RPAP3	PSMD11	CSTF1	METTL13	PNO1	RAD1	UBE2G1	NUP155	GPN3	PRPSAP2	PPID	ACTR6	GTF3C3	COPS3	PSME3	KATNA1	FBXO5	INTS12	LRRC42	PSMD1	AIDA	GDE1	C5orf22	PRIM1	MPDU1	C20orf111	MSH2	SNX4	RFC2	NUP37	PCMT1	MAPRE1	C17orf75	PXMP2	PSMD7	DUSP12	ALG6	MAD2L1	DDX52	ISG20L2	PIGF	UBE2V2	DDX23	TIMM23	ZNHIT3	ERI3	DARS2	TIMELESS	PEX19
Top genes:	BOLA1:3	C1orf9:3	DARS2:3	ANGEL2:2	RPS6KC1:2	TMCO1:2	SF3B4:2	TFB2M:2	METTL13:2	TBCE:2	TOMM20:2	UFC1:2	POGK:2	GGPS1:2	VPS72:2	RCOR3:2	VPS45:2	DCAF6:2	ISG20L2:2	PRCC:2
30	ID104	5
brca.gse2034	SEZ6L	HMP19	KCNK3	SCGN	CACNB2	HDC	SNAP25	SPINK1	CGA	UGT2B4	APLP1	PTPRN2	DAAM2	ASCL1	PVALB	AP3B2	UGT2B17	UGT2B15	GNAZ	RAB36	EMID1
brca.tcga	RUNDC3A	SNAP25	UNC13A	CPLX2	SYP	MYT1	PCSK1	BSN	STMN3	SCAMP5	KCNC1	APLP1	CHGB	HMP19	KCNK3	GDAP1L1	CHRNB2	KCNH2	SCG3	MAPK8IP1	KCNC3	AP3B2	GDAP1	CHGA	STXBP5L	PCSK2	ASPHD1	FAM155B	RIMS2	BEX1	CRYBA2	CBLN1	NMNAT2	BRSK2	CRMP1	NELL1	LPHN1	GNG3	EEF1A2	MPP2	MAPK8IP2	PAH	INSM1	SEZ6L2	ABCA2	ASCL1	GRM4	SEC14L5	STMN4
coad.gse14333	null
coad.tcga	HOXD10	HOXD11	SCG3	SCGN	HOXD13	HOXD9	CHGB	HOXD1	HOXD3	RET	APOH
ov.gse9891	SCG3	CHGB	CRMP1	STMN3	INA	CELSR3	AP3B2	SCN3B	PTPRT	GNG4	OLFM1	JPH3	GABRB3	FAM155B	SNAP25	EEF1A2	PCLO	ONECUT2	PGBD5	DNAJC6
ov.tcga	SCG3	GNG4	PGBD5	INA	SCN3B	CHGA	CRMP1	KCNK3	SNAP25	FAM155B	PAQR4	KREMEN2
Top genes:	SNAP25:4	SCG3:4	KCNK3:3	AP3B2:3	CHGB:3	FAM155B:3	CRMP1:3	HMP19:2	SCGN:2	APLP1:2	ASCL1:2	STMN3:2	CHGA:2	EEF1A2:2	INA:2	SCN3B:2	GNG4:2	PGBD5:2	SEZ6L:1	CACNB2:1
31	ID0	5
brca.gse2034	ELAVL3	TCF15	CYP11B2	TOMM40	ZNF205	UNC93B1	TRPV6	DOHH	RRP1	EPHB4	MDFI	DUSP9	ZNF787	MAPK12	EGFL7	ST3GAL4	PLXNB3	HSD17B14	MNX1	CCDC28B	SPEG	ARID5A	AMH	FCHO1	ETV6	MUC6	SRPK3	CELSR3	ARHGEF2	ARC	VWA1
brca.tcga	GALR3	MYOD1	COX6A2	EN2	SOX18	SPPL2B	PHOX2A	EVX1	GRIN2D	MAP3K10	SF3A2	NEUROG3	CACNA1E	FOXB1	SOX3	HCN2	FBXL8	FOXC2	HCN4	MMP17	AVP	ZNF205	ZNF467	ZNF787	CACNA1I	RHBDL1	C19orf73	AMN	PRR7	IER5	ARTN	GPSM3	SOX17	DES	TCEA2	CEBPA	SYNGR4	NOTCH3	MAST1	LBH	LHX1	APOLD1	PCSK1N	BAALC	HOXB8	CKB	RAPGEF5	GRIN2C	NTN1
coad.gse14333	null
coad.tcga	MYOD1	FOXB1	EVX1	COX6A2	GALR3	CACNA1E	NEUROG3	ARTN	PHOX2A	GRIN2D	SOX18	EN2	P2RY4	SOX3	RHBDL1	IER5	UTF1	FBXL8	GPSM3	AVP	CSF1R	C1QA	BAALC	CCL4	MMP17	FTH1	AMN	MFSD7	VSIG4	COX7A1	PCSK1N	TYROBP	LHX1	FAIM3	GZMB	PFKL	PDZK1IP1	LMF2	MUC6	CCL18	LILRB2	CCL13	SYNGR4	TMEM176A	BAX	MAST1	ACADS	S100A5	MYH11
ov.gse9891	CRABP2	PEA15	SOX18	HSD17B14	AADAC	SYNDIG1	PTGDS	COL13A1	CLSTN2	EPHB3	CALML5	GABBR2
ov.tcga	C11orf9	PTGDS	PCBP4	HSPA12A	APLP1	PALM	PHLDA3	OGDHL	C19orf21	DGKG	FGFR3	HSD17B14	ZDHHC8P1
Top genes:	HSD17B14:3	SOX18:3	ZNF205:2	ZNF787:2	MUC6:2	GALR3:2	MYOD1:2	COX6A2:2	EN2:2	PHOX2A:2	EVX1:2	GRIN2D:2	NEUROG3:2	CACNA1E:2	FOXB1:2	SOX3:2	FBXL8:2	MMP17:2	AVP:2	RHBDL1:2
32	ID231	5
brca.gse2034	null
brca.tcga	MYH2	MYL1	CSRP3	CKM	APOBEC2	TTN	MYOZ2	MYH1	SMPX	MYH4	TNNI2	TNNC1	MYBPC2	MYH7	ANKRD1	MYF6
coad.gse14333	KBTBD10	MYH1	CKM	MYL1	CA3	ACTA1	MYBPC2	MYBPC1	WISP2	FMO3	CYP26A1	ENPP1
coad.tcga	EFHC1	AGBL2	C8orf44	TPPP3	CA3	KBTBD10	AKAP4	CCDC40	KCNMB4	RTDR1	MYO15A	ZCWPW1
ov.gse9891	INHBE	BMP5	MYBPC2	PDE2A	GNAL	IL1R2	TRIM36	SH3BGR	PHYH	INSL6
ov.tcga	MAOB	DIRAS3	NDP	KLHDC8A	RGN	PRR5L	CDO1	SMPX	LHX6	ITPR1	BAALC	CDHR1	IGFBP1
Top genes:	MYBPC2:3	MYL1:2	CKM:2	MYH1:2	SMPX:2	KBTBD10:2	CA3:2	MYH2:1	CSRP3:1	APOBEC2:1	TTN:1	MYOZ2:1	MYH4:1	TNNI2:1	TNNC1:1	MYH7:1	ANKRD1:1	MYF6:1	___3175:1	___3176:1
33	ID43	5
brca.gse2034	ALG8	CLNS1A	NARS2	C11orf67	RSF1	NDUFC2	GAB2	FADD	PRKRIR	NADSYN1	PAAF1	CHCHD8	POLD3	CTTN	PPFIA1	PAK1	DPP3	UVRAG	MRPL48	KLC2
brca.tcga	CLNS1A	RSF1	NARS2	ALG8	NDUFC2	C11orf67	PRKRIR	GAB2	RPS3	PAK1	UVRAG	POLD3	PPME1
coad.gse14333	null
coad.tcga	WISP3	FOLR1	PLAC1	CKM	FOLR3	DNALI1	PFN2	C3orf14	TMEM158	TREML2	APIP
ov.gse9891	UVRAG	FOLR1	NARS2	PRKRIR	MRPL48	RSF1	C11orf51	GAB2	ALG8	TRIM17	PRSS21	SELENBP1	FOLR3	ZNF467	C11orf67	PAAF1	BCL2L14	KCNH2	RFX5	UGT8	ALOX12P2	HMGA1	DPEP3	ABCA3	TRIM58	WISP3	ARTN	NOS3
ov.tcga	ALG8	NDUFC2	PAK1	C11orf30	CLNS1A	NARS2	RSF1	PRKRIR	C11orf67	UVRAG	GAB2	CAPN5	TSKU	GDPD5	LRRC32	WNT11
Top genes:	ALG8:4	NARS2:4	C11orf67:4	RSF1:4	GAB2:4	PRKRIR:4	UVRAG:4	CLNS1A:3	NDUFC2:3	PAK1:3	PAAF1:2	POLD3:2	MRPL48:2	WISP3:2	FOLR1:2	FOLR3:2	FADD:1	NADSYN1:1	CHCHD8:1	CTTN:1
34	ID148	5
brca.gse2034	GRSF1	G3BP2	SRP72	RCHY1	NUP54	UTP3	ANKRD17	TMEM165	SDAD1	USO1	MTHFD2L	RPRD1A	CSTF3
brca.tcga	REEP2	GNAZ	RTDR1	ZDHHC8P1	C1QL1	THEG	NFE2	BMP5	PRPH	RND2	PFKM	USP2	NYNRIN	RAB36	EMID1	FKBP10
coad.gse14333	NAP1L1	PFKM	TMEM5	EIF2S3	LDHB	RSL1D1	LTA4H	RCN1	PEBP1	PABPC4	LYRM1
coad.tcga	PHGDH	ASNS	PSAT1	UNC93A	PFKM	GRB10	PPAT	STC2	RNFT2	RAB36	GNAZ
ov.gse9891	HAUS3	GRPEL1	MRFAP1L1	SLBP	FAM193A	MAEA	RNF4	WHSC1	PCGF3	PIGG	WHSC2	TNIP2	ATP5I	TMEM33	DCK	LRPAP1	CEP135	MAN2B2	TACC3	WDR1	KIAA0232	MFSD10	CENPC1	UTP3	CTBP1	GUF1	CHIC2	CLOCK	NUP54	PPAT	GRSF1	MED28	TBC1D19	PAICS	COMMD8	UBA6	ACOX3	SGCB	MYL5	DCUN1D4	QDPR	SDAD1	SH3TC1	RUFY3	G3BP2	USP46	SRD5A3	MTHFD2L	PAQR3
ov.tcga	null
Top genes:	PFKM:3	GRSF1:2	G3BP2:2	NUP54:2	UTP3:2	SDAD1:2	MTHFD2L:2	GNAZ:2	RAB36:2	PPAT:2	SRP72:1	RCHY1:1	ANKRD17:1	TMEM165:1	USO1:1	RPRD1A:1	CSTF3:1	___2299:1	___2300:1	___2301:1
35	ID151	5
brca.gse2034	APOD	HMGCS2	IDH1	IL13RA1	TRIM68	INSIG2	INHBB	SMPDL3A	DBI	OSBPL10	MORC4	FAM5C	BCAP29	MGAT4A	SPTSSA	SLC12A2	GPC4	EGF	ETHE1	ITGB6
brca.tcga	ABCA12	CLCA2	KMO	AKR1B10	SRD5A3	IDH1	ACPP	P2RY2	GGCT	ENTPD7	HGD	TRIL	FAM5C	GJB1	ALDH3B2	TBX10	SLC31A1	SLC9A2	DBI	PHEX	OAZ3	ERO1L	CES3	REN	TTC9	EGF	PIK3R3	ZP2	DAAM1	PPP1R13B	THRB	ETFA	AVL9	SYCP1	BZW2	SLC35D1	RAB15	RAP2C	WNT7B	PBX1	C4orf6
coad.gse14333	null
coad.tcga	C4orf19	CYP2C18	NR3C2	B3GALT5	HHLA2	CHST5	AHCYL2	ERN2	PKP2	PLS1	DSC2	XDH	EPS8L3	NOS2	FRK	SCIN	IQGAP2	UGT8	F2RL1	BCL2L14	PAPSS2	SLC46A3	BCMO1	FABP2	LIMA1	CATSPERB	SLC35D1	PI3	LRRC31	PIGR	ATP8A1	EFNA2	ATP1B1	SLC6A8	MUC4	TSPAN12	C4BPB	PARM1	STYK1	AKR1B10	FUT2	SLC28A2	SMPDL3A	CAST	SULT1B1	TRIM31	IL33	CYP2C9	ADAP1
ov.gse9891	TNNI3	TNNT1	SEZ6L2	SULT1A2	RTN2	ASPHD1	KCTD13	ZNF768	SEPHS2	PPDPF	QPRT	CBX4
ov.tcga	FUT2	PRRG4	TNFRSF14	TMC5	ACSL5	STEAP3	LY75	SFN	SGMS1	EHF	LGALS3	CD82	TTC9	SLC28A3	RNF39	TJP3	FXYD3	KCNN4	MST1R	PRSS16	SLC5A1	MPZL2	ARHGAP26	TRPM4	CLDN10	SLC44A4	MACROD1	PLEK2	GJB1	PIEZO1	MAP3K6	TAPBPL	CISH	CA12	LRP8	SLC22A4	LAD1	MAST4	SEZ6L2	RNF125	ITPR3	DHRS3	ASPHD1	FGFBP1	PPP1R13L	RTN2	PLLP	CES3	TRMT2B
Top genes:	IDH1:2	SMPDL3A:2	DBI:2	FAM5C:2	EGF:2	AKR1B10:2	GJB1:2	CES3:2	TTC9:2	SLC35D1:2	FUT2:2	SEZ6L2:2	RTN2:2	ASPHD1:2	APOD:1	HMGCS2:1	IL13RA1:1	TRIM68:1	INSIG2:1	INHBB:1
36	ID132	5
brca.gse2034	null
brca.tcga	DSCR6	ITPKA	FOXD2	SOX2	TMEM106C	ABCC5	PXMP2	PAQR5	EYA1	LRRC20	WWOX	HTR1D
coad.gse14333	SLC22A18	SLC9A3R1	PXMP2	TMEM106C	TTC38	MPST	SLC22A18AS	GCHFR	ITPKA	PMM1
coad.tcga	DENND2A	FUCA1	PVRL3	RORC	SLC22A18AS	SLC25A20	ETFDH	CCT6B	ROM1	PGM1
ov.gse9891	SEC24B	CLCN3	CBR4	MAP9	BBS7	LRBA	ANAPC10	ARFIP1	CTSO	LAMTOR3	NEK1	MSMO1	AIMP1	UFSP2	CDKN2AIP	RAPGEF2	PGRMC2	DCTD	KLHL2	ING2	PPA2	PLA2G12A	PDGFC	ETFDH	GALNT7	CASP3	NAA15	PHF17	AGA	GLRB	CASP6	CCNG2	BDH2	TBC1D9	PEX12	RAP1GDS1	SMAD1	TMEM144	TRIM2	PAPSS1	SPCS3	HADH	CCT6B	CLGN	PPP3CA	ELOVL6	GABARAPL1
ov.tcga	GDPD3	C10orf116	SNCG	PAEP	SLC22A18	BNC1	MMRN2	POU2F3	SLC22A18AS	EMP2	SH3TC1	PHLDA2	GABRE	HYAL1	ALOX12P2
Top genes:	SLC22A18AS:3	ITPKA:2	TMEM106C:2	PXMP2:2	SLC22A18:2	ETFDH:2	CCT6B:2	DSCR6:1	FOXD2:1	SOX2:1	ABCC5:1	PAQR5:1	EYA1:1	LRRC20:1	WWOX:1	HTR1D:1	___2756:1	___2757:1	___2758:1	___2759:1
37	ID2	5
brca.gse2034	FSTL1	CRISPLD2	MMP2	DCN	NDN	PDGFRA	SPARC	LHFP	HTRA1	LAMB1	AKAP12	CAV1	ZEB1	SPON1	GNG11	TMEM204	CTSK	TCF4	ZCCHC24	CXCL12	ECM2	SRPX	PCOLCE	CDH11	CFH	GLT8D2	FLRT2	LTBP2	PROS1	NNMT	FBN1	RECK	PDGFRL	JAM3	HEG1	COL5A2	ANGPTL2	LDB2	ACTA2	COL6A3	VCAN	IGFBP7	DACT1	OLFML1	CAV2	PARVA	OLFML2B	SNAI2	GAS1
brca.tcga	ECM2	GLT8D2	NDN	FLRT2	JAM3	RUNX1T1	SERPINF1	HTRA1	BNC2	VCAN	FBN1	FAP	LRRC32	RBMS3	FSTL1	LHFP	COL1A1	DCN	SPON1	COL6A3	SPARC	PCSK5	COL1A2	TCF4	LAMA2	MAGEL2	GNG11	GLI2	ZCCHC24	COL5A2	COL5A1	MMP2	THBS2	PTRF	PTH1R	PCOLCE	JAM2	MFAP4	LDB2	SGCD	POSTN	CTSK	ADAM12	GAS7	GPR124	CDH11	LOXL1	CXCL12	COPZ2
coad.gse14333	QKI	ZEB2	SERPINF1	TIMP2	TSPAN4	DCN	TUBB6	GLT8D2	ENTPD1	EFEMP2	VIM	FERMT2	FBN1	SERPING1	PTRF	EMP3	MITF	FSTL1	HEG1	COL6A2	RAB31	TAGLN	AKT3	GUCY1B3	CALD1	PMP22	C1S	SPARC	ZEB1	NNMT	NR3C1	MSN	ACTA2	TCF4	SDC2	LHFP	IGFBP7	SPG20	MGP	CSF1R	KCNE4	IL1R1	VGLL3	CFH	CSGALNACT2	COLEC12	OSMR	MAFB	OLFML2B
coad.tcga	null
ov.gse9891	SVIL	AKAP12	LIMCH1	PELI1	CLDN1	ARHGAP29	HSPA2	SASH1	PHACTR2	JAG1	UXS1
ov.tcga	FBN1	COL3A1	SPARC	MMP2	SNAI2	ANGPTL2	LHFP	FN1	INHBA	COL1A2	PCOLCE	COL5A1	AEBP1	COL1A1	PMP22	COPZ2	THBS1	EDNRA	CRISPLD2	PDLIM3	PDPN	COL5A2	COL6A3	OLFML1	FILIP1L	GLT8D2	PDGFRB	VCAN	COL6A2	PALLD	TGFB1I1	CDH11	ACTA2	BGN	DCN	ZCCHC24	ECM2	TMEM158	FAP	OLFML2B	NID1	NUAK1	CALD1	FSTL1	CTSK	GEM	FZD1	ECM1	SRPX
Top genes:	FSTL1:4	DCN:4	SPARC:4	LHFP:4	GLT8D2:4	FBN1:4	MMP2:3	CTSK:3	TCF4:3	ZCCHC24:3	ECM2:3	PCOLCE:3	CDH11:3	COL5A2:3	ACTA2:3	COL6A3:3	VCAN:3	OLFML2B:3	SERPINF1:3	CRISPLD2:2
38	ID64	5
brca.gse2034	RPL10A	RPL11	RPS25	RPS8	RPL35A	RPS3	RPS19	EIF3F	RPL36	RPL4	RPL5	RPLP2	RPL35	GNB2L1	FBL	C6orf48	EIF3K	SNRPD2
brca.tcga	ACYP2	GNG13	LINC00115	ACYP1	CA10	ELOVL6	MAGEF1	FKBP6	ZNF165	USP13	DRD5	C10orf95	CDH16	C6orf48
coad.gse14333	null
coad.tcga	COL17A1	MTMR11	SLC16A5	C10orf116	P2RY2	EPHA1	CORO2A	AUTS2	H1F0	ZNF219	ACSF2	EPN3	EGFR	NMT2	MXI1	CDH3	CACNB3	TAC3	PYGB	CARD14	TRIP6
ov.gse9891	IMPDH2	GLTSCR2	EIF4B	LETMD1	NPM1	RPL13A	MYC	IGBP1	POLR1E	EIF3F	EEF2	TMCO6	RPL31	METTL21B	THG1L	LRPPRC	CEP68	NANOG	RPL10L	MXI1	C6orf48	RPS23	AMT	CCNG1	SLC27A5	PDCD4	PODXL	OGT	PCF11	UTP14A	THNSL1	FHIT	TRIP6	PTCD3	PRMT3	PAIP2B	CLK4	WDR3	METTL8	WDR60	CLK1	TCF7L2	ADCK3	AHCY	MCM3AP-AS1	EBLN2	B3GNTL1	EHBP1	LIPT1
ov.tcga	RPS5	RPL31	RPL36	IMPDH2	LETMD1	AHCY	RPS21	C6orf48	SH3YL1	GLTSCR2	SNRPD2	SLC27A5	RGS10	MGMT
Top genes:	C6orf48:4	EIF3F:2	RPL36:2	SNRPD2:2	MXI1:2	TRIP6:2	IMPDH2:2	GLTSCR2:2	LETMD1:2	RPL31:2	SLC27A5:2	AHCY:2	RPL10A:1	RPL11:1	RPS25:1	RPS8:1	RPL35A:1	RPS3:1	RPS19:1	RPL4:1
39	ID68	5
brca.gse2034	null
brca.tcga	SERPINA6	PPP4R4	SERPINA1	SLC4A7	GAD1	LEF1	TIPARP	PBX3	CA2	LRRFIP2
coad.gse14333	DKK4	BAMBI	CST2	FGF20	NELL2	CST1	BMP4	LEF1	MSX2	TBX3	KRT5	EDAR	MSX1	WFS1	MCOLN3	BMP7
coad.tcga	FGF20	BMP4	BAMBI	LEF1	TBX3	DKK4	RHOBTB3	RIMBP2	GJC2	WFS1	HSD3B1	MYO6	SHC2	SPRY2	HEY1	MYT1	INHBB	IRX5
ov.gse9891	DKK4	MSX2	EDN3	FGF20	GAD1	DYNC1I1	GFRA3	DLX5	WIF1	SLC47A1	RASL11B	EDAR	SCML1	FGF3	PROX1	CST1	EPHA7	IHH	WFS1	RIMS2	ODAM	FAM5B	GLT25D2	CST2	REPS2	BDNF	TNFSF8	ARL4A	S100A3	CRAT	DLX6	LEF1	VSNL1	IL23A	PIP5K1B	FAM189A2	ASTN1	WNT6	NUDT4	INSL3	KLK1	CYP26B1	SLC6A14	SFN	RBP1	PLP1	TRH	SYT17	FGF13
ov.tcga	FYN	SCG5	LEF1	FAM110B	CCND2	PLAT	D4S234E	NRGN	CPE	KLHL3	GJA4	ALDH1A2	GPC4	TBX2	ITGA7	CST1	CA8	MAMLD1	KIF5C
Top genes:	LEF1:5	DKK4:3	FGF20:3	CST1:3	WFS1:3	GAD1:2	BAMBI:2	CST2:2	BMP4:2	MSX2:2	TBX3:2	EDAR:2	SERPINA6:1	PPP4R4:1	SERPINA1:1	SLC4A7:1	TIPARP:1	PBX3:1	CA2:1	LRRFIP2:1
40	ID246	5
brca.gse2034	ACSM1	MYOM2	PGC	HPGD	CUX2	ALOX15B	HPD	SULT1C2	CES3	RALYL	MAP2K6	LCT
brca.tcga	NAP1L2	GPR137B	SCGN	SLC16A2	ERO1LB	LYST	DLG2	ALOX15B	LGALS8	ARL4D
coad.gse14333	MPP1	CYP2B6	SLC19A3	PIPOX	FCGRT	RBP1	MME	C2orf54	SLC1A7	HSPB3	SYN3	MFAP3L
coad.tcga	SLC6A20	IRF8	CNTNAP2	FAM131B	HPGD	IRS1	GSTM4	ADRBK2	GIPC2	ADM2	GSTM5	OAS1
ov.gse9891	MORC4	GOLM1	DYNLT3	CHST7	PDK3	TFPI	DPY19L1	ACOT9	PPARG	SOCS2	SLCO2A1	ACO1	DKK1	ACSL4	SLC16A2	QSOX1	GLA	MFAP3L	ATG4A	SEPW1	CYP39A1	CASK	ZAK	TTLL7	ARMCX3	CEP112	WWC3	CTSL2	BBS4
ov.tcga	null
Top genes:	HPGD:2	ALOX15B:2	SLC16A2:2	MFAP3L:2	ACSM1:1	MYOM2:1	PGC:1	CUX2:1	HPD:1	SULT1C2:1	CES3:1	RALYL:1	MAP2K6:1	LCT:1	___1314:1	___1315:1	___1316:1	___1317:1	___1318:1	___1319:1
41	ID191	5
brca.gse2034	null
brca.tcga	SORBS2	FAM129A	NFIX	EFNA1	TACSTD2	RNF2	AUTS2	HES1	BHLHB9	PLLP
coad.gse14333	DMD	F8	FHOD3	CEP112	FAM117A	FGF13	REEP1	KL	RGN	PCP4	TAC1	THRB	MAGI2	HSPA12A	GSTM3	ARHGAP6	BDH2	EPHX1
coad.tcga	RRAS	YPEL5	TNNC1	CLIC3	B3GALT4	ALDH3B1	CAPG	MDK	APOD	PLA2G10	CDA	ABCG1	RHOD	SIPA1	PRSS22	FKBP1B	CST2	PLCD1	SLPI	AKR1C3	ZNF185	NDP	RNF39	TACSTD2	CST6	MSLN	C20orf195	RARG	LY6G6C	C6orf15	LXN	UPK3A	FBP1	TSPAN31	PYCARD	RBP4	CST1	ASAP3	HSPB1	ACHE	VILL	PTGES	ITM2B	VWA1	GALC	GSTM3	ANXA9	FMOD	PGC
ov.gse9891	RNASE4	ANG	MAOA	AKR1C4	AKR1C3	PDK4	SDPR	GSTM3	HSD17B11	ANK2	WISP2	PLCL1	GSTM4
ov.tcga	MAOA	NUDT4	GSTM3	GSTA4	SLC16A4	AKR1C3	DNMBP	DNAJC12	CYP39A1	GSTM4
Top genes:	GSTM3:4	AKR1C3:3	TACSTD2:2	MAOA:2	GSTM4:2	SORBS2:1	FAM129A:1	NFIX:1	EFNA1:1	RNF2:1	AUTS2:1	HES1:1	BHLHB9:1	PLLP:1	___2897:1	___2898:1	___2899:1	___2900:1	___2901:1	___2902:1
42	ID86	4
brca.gse2034	LRRC47	MAEA	PANK4	CDK11A	FAM193A	EXOSC10	DVL1	NPHP4	MRPL20	GAK	PIGG	GRPEL1	KIF1B	C1orf174	DFFB	AURKAIP1	RNF4	PARK7	KLHL21	UBR4	SLBP	PCGF3	WHSC1	ATPIF1	ACOX3
brca.tcga	null
coad.gse14333	PKP3	PSENEN	TSTA3	AP1S1	C19orf6	UNC93B1	TAGLN2	PPP3R1	PLEC	ST6GALNAC4	ATP13A2	TRIB1	AGPAT2	APH1A	SLC39A7	SH3GLB2	EFHD2	LDLR	GUK1	EPS8L2	C9orf16	PVRL2	MAD1L1	CYBA	MFSD10	BAX	JUND	CTSZ	METRN	POMGNT1	UBR4	TAF12	DVL1	MARCKSL1	RPA2	GSTP1	ABCA7	PARK7
coad.tcga	null
ov.gse9891	SDHB	WRAP73	PGD	EXOSC10	ATP13A2	SRM	PLEKHM2	RPA2	PEF1	MFN2	DNAJC16	HDAC1	CLSTN1	ZBTB48	UBE4B	C1orf174	CNKSR1	TMEM39B	APITD1	GPN2	ZNF593	ENO1	AKR7A2	CAPZB	KDM1A	KIF1B	SH3BGRL3	SDF4	DFFB	CEP104	SNRNP40	GALE	CAMTA1	RPS6KA1	EFHD2	PHACTR4	TNFRSF25	NPHP4	TAF12	DVL1	MRTO4	VAMP3	KAZN	C1orf63	KLHL21	RBBP4	PFN1	NIPAL3	SMPDL3B
ov.tcga	DNAJC16	GNB1	EXOSC10	CASP9	ICMT	WRAP73	SDF4	PANK4	RPA2	C1orf174	PINK1	HMGCL	GPN2	MRTO4	CEP104	ENO1	NECAP2	CPSF3L	PGD	APITD1	UBE4B	SDHB	NUDC	VAMP3	DFFA	AURKAIP1	CTNNBIP1	KIF1B	CDK11A	SRSF4	TAF12	EFHD2	STX12	SRM	TMEM50A	EIF4G3	HP1BP3	AKR7A2	DVL1	SH3BGRL3	TRNAU1AP	KDM1A	GLTPD1	PIGV	SPEN	KLHL21	FUCA1	RPS6KA1	PHACTR4
Top genes:	DVL1:4	EXOSC10:3	KIF1B:3	C1orf174:3	KLHL21:3	EFHD2:3	TAF12:3	RPA2:3	PANK4:2	CDK11A:2	NPHP4:2	DFFB:2	AURKAIP1:2	PARK7:2	UBR4:2	ATP13A2:2	SDHB:2	WRAP73:2	PGD:2	SRM:2
43	ID13	4
brca.gse2034	ALOX5AP	ATP6V1B2	CSF1R	LIPA	TPP1	MAN2A1	CTSO	RNF130	IL10RB	CST3	GPX3	CAT	F2R	SKAP2	TM6SF1	ANXA5	NFKB1	TIMP1	LAT2	FCGRT	GPX1	ARPC5	IGFBP4	CYB5R4	LITAF	OLFML3	CEBPA	OLR1	CPM	ATM	TREM2	POLD4	RAMP2	PRCP	RNF125	TMX4	PARP4
brca.tcga	null
coad.gse14333	PSMF1	CSNK2A1	MKKS	SNRPB	SNRPB2	SNX5	SEC23B	TASP1	PCNA	IDH3B	FASTKD5	ESF1	CENPB	NSFL1C	PTPRA	DDRGK1	PANK2	CRNKL1	NOP56	POLR3F	NXT1	KIF16B	ANKRD5	ITPA	BTBD3	C20orf27	FKBP1A	RRBP1	C20orf3	CDC25B	RBCK1	GINS1	DSTN	TMX4	ENTPD6	ATRN	JAG1	PLCB1
coad.tcga	PSMF1	CRNKL1	PANK2	CSNK2A1	ITPA	SNRPB2	POLR3F	IDH3B	CDS2	MKKS	PTPRA	TASP1	NSFL1C	NOP56	VPS16	SEC23B	FERMT1	DSTN	ZNF343	ESF1	ZNF133	SNX5	PCNA	FASTKD5	C20orf3	C20orf27	SNRPB	RBBP9	NXT1	FKBP1A	ANKRD5	SMOX	RRBP1	CDC25B	ENTPD6	RBCK1	KIF16B	ATRN	BTBD3	TRIB3	ZNF337	RNF24	JAG1	GINS1	RIN2	TMX4	PLK1S1	OVOL2	HEATR8
ov.gse9891	CSNK2A1	ATRN	IDH3B	FASTKD5	SNRPB	FKBP1A	ProSAPiP1	SOX12	CENPB	NRSN2	DDRGK1	RBCK1	RNF24	PCDHB12	PCDHB6	PLCB1	ABCA4	FAM107A	PCDHA9
ov.tcga	null
Top genes:	TMX4:3	CSNK2A1:3	SNRPB:3	IDH3B:3	FASTKD5:3	FKBP1A:3	RBCK1:3	ATRN:3	PSMF1:2	MKKS:2	SNRPB2:2	SNX5:2	SEC23B:2	TASP1:2	PCNA:2	ESF1:2	CENPB:2	NSFL1C:2	PTPRA:2	DDRGK1:2
44	ID105	4
brca.gse2034	POP7	PUS7	ATP5J2	SSBP1	BUD31	AGK	SLC25A13	UBE3C	CHCHD3	TRIM24	MRPS33	BAZ1B	SHFM1	RBM28	NDUFB2	TBL2	PAXIP1	REPIN1	LUC7L2	KLHDC10	NAA38	GALNT11	IMPDH1	ZNF277	MDH2	GTF2IRD1	NAMPT	NSUN5	CYP51A1	CLDN4	ABHD11	COG5	STYXL1	TMEM8B
brca.tcga	null
coad.gse14333	null
coad.tcga	TP53TG1	TTC30A	ZC4H2	LIN7B	FIS1	BBS10	ANXA3	CDK20	SLC25A36	SPAG4	RLN2	POT1	ZNF780B	EREG	SLC16A4	CROT	BDH2	TM4SF1	QPCT	IFT46	RLN1	ITGB6	LYRM2	LEPROT	MSRB2	TCFL5	LRRC23	GPR19	SRI	TAF1B	TP53I3	C7orf23	DEFB1	CD9	CPE	SEMA3A	MNS1	FAM60A	CAT	RHCG	NDUFA4	C1orf56	MEST	IFT52	COCH	KRCC1	INPP4B	SKIL	TMEM106B
ov.gse9891	ARPC1A	CDK5	CBLL1	ARHGEF5	SLC25A13	STYXL1	PLOD3	GSTK1	WBSCR22	GNB2	POR	PUS7	AP1S1	MRPS33	SYPL1	PAXIP1	DNAJB6	PEX1	TRRAP	BET1	TP53TG1	REPIN1	C7orf23	IFRD1	PON2	ATP5J2	PRKAG2	ACTR3B	ZNF277	C7orf49	ATP6V0E2	SLC4A2	ABHD11	ZNF767	WDR91	ACN9	TRIM24	POT1	CASD1	GUSB	HSPB1	FAM3C	TMEM168	SRI	GALNT11	ASL	TES	CLDN4	SPR
ov.tcga	NUP205	COG5	CHCHD3	RINT1	GCC1	UBE3C	POT1	ZNF3	BET1	ADCK2	BUD31	ZNF394	ING3	CDK5	ARF5	PAXIP1	CUL1	SLC25A13	DNAJB6	TMEM168	CAPZA2	GATAD1	MKRN1	ACN9	SYPL1	MEPCE	CBLL1	PUS7	DLD	FASTK	ZNF282	NDUFA5	C7orf49	DNAJB9	RBM28	MKLN1	IFRD1	BPGM	ARPC1A	ZNF277	ARHGEF5	ZNHIT1	TRRAP	GALNT11	MTERF	NDUFB2	ZKSCAN1	ATP5J2	C7orf23
Top genes:	PUS7:3	ATP5J2:3	SLC25A13:3	PAXIP1:3	GALNT11:3	ZNF277:3	POT1:3	C7orf23:3	BUD31:2	UBE3C:2	CHCHD3:2	TRIM24:2	MRPS33:2	RBM28:2	NDUFB2:2	REPIN1:2	CLDN4:2	ABHD11:2	COG5:2	STYXL1:2
45	ID76	4
brca.gse2034	ASH2L	ERLIN2	LSM1	DDHD2	PROSC	VDAC3	RAB11FIP1	BRF2	WHSC1L1	BAG4	POLB	GOLGA7	AP3M2	EIF4EBP1	HGSNAT	IKBKB	RNF170	FGFR1	FNTA	THAP1	SLC20A2
brca.tcga	ASH2L	WHSC1L1	BRF2	LSM1	DDHD2	PROSC	BAG4	GOLGA7	ERLIN2	AP3M2	KAT6A	FGFR1	RAB11FIP1	VDAC3	ANK1	FNTA	BDNF	RNF170	ZIM2	HGSNAT	SLIT1	PEG3	ADAM9	NRCAM	GLDC	POLB	SLC20A2	IKBKB	NPTX1	COL2A1	PDE5A	SLC47A1	ENO2	MCHR1	SOX5	RIMBP2	ADAMTSL3	TUBB1	DOCK3	CNTFR
coad.gse14333	null
coad.tcga	MVD	HMGCS1	GSPT1	LSS	SCD	INSIG1	PRR5L	SQLE	DHCR7	CYB5B	HNRNPAB	EFNA3	IDI1	NIPAL2	AGPAT2	CDIPT	GFPT1	MSMO1	IMPDH1	MAPK3	TGS1	DBNDD1	ABCC1	GAB1	TSPAN15	SHH	TMBIM1	STRN
ov.gse9891	INSIG1	SLC3A2	DHCR7	ATP1B3	CYP51A1	SLC7A5	EIF4EBP1	TRIB3	ASNS	SLC1A4	STC2	SCD	SLC26A6	SQLE	UAP1	GLB1	PRDX4	TMEM38B	SIAH2	GLRX2	AARS	CHAC1	PHGDH	SLC1A5	UCK2	GRB10	SSR3	SLC33A1
ov.tcga	null
Top genes:	ASH2L:2	ERLIN2:2	LSM1:2	DDHD2:2	PROSC:2	VDAC3:2	RAB11FIP1:2	BRF2:2	WHSC1L1:2	BAG4:2	POLB:2	GOLGA7:2	AP3M2:2	EIF4EBP1:2	HGSNAT:2	IKBKB:2	RNF170:2	FGFR1:2	FNTA:2	SLC20A2:2
46	ID14	4
brca.gse2034	KDELR1	ARF1	GNB2	ACTB	PSMC3	NUCB1	SNX17	POLR2E	P4HB	TMED2	DCTN1	CDC37	YIPF5	HSP90AB1	EIF2S3	ASNA1	CRK	TXLNA	CAPNS1	RHOC	HMG20B	TSC2	GDE1	CLPTM1	NAPA	CAPN1	ALDH18A1	RBBP4	DNAJC4	PPP1CA	STAT3	CCNL2	AIDA	PGD	LRRC41	SERF2	CRIP2	PLD3	YWHAE	MGAT4B	COPE	TLN1	MED6	CANX	NONO	NRBP1	WAC	ABL1	OGDH
brca.tcga	NAA60	AP1B1	CAPN1	AKT1	ARFGAP2	SNX17	PPP5C	TOM1	CYTH2	ARAF	CORO1B	PICK1	USP19	USP5	ZNF768	NR2F6	DNAL4	CDIPT	MARS	PPP1CA	RPS6KB2	KLHL22	GNAI2	MFSD10	ZNF263	TMEM110	RNPEP	RAB1B	PRKAG1	LPCAT3	SUN2	SDHA	CHPF	ALDOA	EPHB4	NAPA	NDUFS2	RANGAP1	AMDHD2	ACP2	TUBA1A	SLC12A7	AP1M2	GMPPB	PLD2	FBXW4	CLCN7	NUMA1	NEK9
coad.gse14333	null
coad.tcga	GRN	CHPF	DBN1	GAA	CCND1	MAN2B1	SEMA4D	ACTN3	DENND3	CHST3	GLTP	SDC3	HOMER3	CBX6	CPD	IGFBP3	CPEB3	MAGEF1	NCS1	CYTH1	BLMH	SEMA4F	LRFN3	ADCY7	CLUAP1	KIAA0513	TINAGL1	JRKL	HABP4	ZCCHC11
ov.gse9891	CLPTM1	ISOC2	SLC39A1	FKBP10	PRMT1	CLASRP	TAF15	MMP14	BAX	PIP5K1A	GTF2H4	RAB5C	ZNF428	SEPT9	RAC3	SLC16A3	STRN4	RAD23B	ACP2	AP2B1	NUP62	TMED9	NAPA	PRR7	PNKP	PPP5C	NUCB1	IRF3	GYS1	NPM3	PVRL2	KDELR1	TAGLN2	BCAT2	PPP2R1A	TNKS2	FUS	ERF	RUVBL2	DBP	TBC1D17	BCAM	RRBP1	CBLC	ZNF580	NCKAP1L	PTOV1	MOGS	ERCC1
ov.tcga	null
Top genes:	NAPA:3	KDELR1:2	NUCB1:2	SNX17:2	CLPTM1:2	CAPN1:2	PPP1CA:2	PGD:2	PPP5C:2	CHPF:2	ACP2:2	ARF1:1	GNB2:1	ACTB:1	PSMC3:1	POLR2E:1	P4HB:1	TMED2:1	DCTN1:1	CDC37:1
47	ID70	4
brca.gse2034	SEH1L	CEP76	MIS12	PSMG2	SMAD2	RALBP1	VPS4B	CEP192	ZNF232	NUP88	GGNBP2	TRAPPC8	GLOD4	RPA1	RHOT1	IMPACT	VAPA	PPP4R1	RNMTL1	TXNL1	METTL4	C17orf85	AFG3L2	PIK3C3	APITD1	THOC1	C1QBP	NARS	YES1	ZNHIT3	PFAS	RBBP8	PSMB6	UBE2G1	USP14	MEX3C	STX8	RNF138	PSIP1	C18orf8	ZCCHC2	COPS3	ACYP1	TTC19	ANKRD12	ITGAE	ATP5A1	DERL2	PHLPP1
brca.tcga	null
coad.gse14333	null
coad.tcga	RAB27B	FECH	DUSP4	TNFAIP8	HPSE	SEMG1	PPP4R1	GPR126	DAPK1	GFI1	FSCN1	MLPH	FUT8	ENO2	PLCL2	BLVRA	P4HA1	OSR2	ATP5A1	ETV5	TWSG1	CCDC68	FOXD1	C18orf25	ANXA10	TNNT1	SGPP1	MAP3K6	PDE4D	MAP3K5	SGCB	PAX9	EGLN3	ALOX5	GAD1	STRN3	QSOX1	NXF3	PNMA1	CCK	BNIP3L	LMAN1	CD55	FAM46A	ARNTL2	RNF138	CCDC109B	WDR7	NUCB2
ov.gse9891	YES1	SEH1L	METTL4	C18orf8	CEP76	NAPG	PPP4R1	CEP192	SMCHD1	RALBP1	LPIN2	AFG3L2	USP14	IMPA2	TWSG1	IMPACT	CHMP1B	NPC1	ENOSF1	SS18	TGIF1	RBBP8	BPGM	FAM59A	OSBPL1A	RNF138	SLC15A2
ov.tcga	PRKCH	CD55	S100A6	LMNA	S100A11	PTGER2	ANXA1	S100A9	MGLL	NDRG1	GPRC5A	DUSP10	TMPRSS4	ST3GAL1	RAB20	TMEM176A	S100A2	TLR5	B3GNT3	TMEM176B	TFAP2C	NCALD	MTUS1	CX3CL1	KRT23	PLS1	PPAP2C	EGLN3	RUNX3	SPAG1	TNFRSF21	SPR	S100A8	EMP1	ANXA2	PCDH7	SUSD4	S100A10	FMO2	SLC26A2	TUBA4A	ENTPD3	VWA1	SEMA4A	SLC24A3	SPSB1	GALNT14	EPHX1	RNF19A
Top genes:	PPP4R1:3	RNF138:3	SEH1L:2	CEP76:2	RALBP1:2	CEP192:2	IMPACT:2	METTL4:2	AFG3L2:2	YES1:2	RBBP8:2	USP14:2	C18orf8:2	ATP5A1:2	TWSG1:2	EGLN3:2	CD55:2	MIS12:1	PSMG2:1	SMAD2:1
48	ID219	4
brca.gse2034	HSPB1	NKAIN1	EEF1A2	ADCY1	ELOVL2	RAMP1	CRABP2	HSPB8	KCNK15	TNNT1	FGFR3	CACNA1H	KCNJ3	EPB41L1	ADIPOR2	ATP9A	GATA2	H2AFJ	IFT122	SULT2B1	LAMA5	CNNM4	SOX12	WNT4	SIX1	MICALL2	TNNI3	ISYNA1	RAMP3	GDPD3	SATB2	CXXC4
brca.tcga	HOXB3	HOXB6	HOXB5	HOXB2	HOXB7	CDX2	HOXC10	HOXC11	HOXD1	HOXC8	HOXC6	HOXC5	HOXC13	SIX1	SKAP1	PLAC1	FZD2	UPK1A	CACNB3	HOXD3	CRABP2	PAFAH1B3
coad.gse14333	null
coad.tcga	HOXC8	TANC2	HOXC6	HOMER2	SLC25A21	SLC7A2	DOCK3	WASF1	MSH4	HRASLS	UST	STAC	N4BP3	SLC4A3	BAI2	RAB3B	GATA4	HOXC11	B3GALNT1	VAMP1	MPP3	TNNI3	HOXC5	CELA3A	TGM1	HOMER1	ITGB1BP2
ov.gse9891	HOXB5	HOXB3	HOXB7	HOXB6	HOXB2	HOXB8	GPRC5C	PLS1	ACSF2	HGD	S100A2	HOXB9	TOB1	AKAP1	PRR15L	NOV	OVOL1	HKDC1	TSPAN15
ov.tcga	null
Top genes:	CRABP2:2	SIX1:2	TNNI3:2	HOXB3:2	HOXB6:2	HOXB5:2	HOXB2:2	HOXB7:2	HOXC11:2	HOXC8:2	HOXC6:2	HOXC5:2	HSPB1:1	NKAIN1:1	EEF1A2:1	ADCY1:1	ELOVL2:1	RAMP1:1	HSPB8:1	KCNK15:1
49	ID176	4
brca.gse2034	HYOU1	RPN2	RPN1	PDIA5	KDELR2	HSP90B1	GORASP2	STT3A	MANF	PRDX4	PDIA4	SDF2L1	GFPT1	SRPRB	SSR4	FKBP11	MAGED1	COPB2	GMDS	CKAP4	SEC13	SSR3	DNAJB9	SEC22B	CRELD2	SEC31A	KDELR3	SLC12A8	HERPUD1	SND1	GSK3B	DCPS	P4HA2	VPS37B	SPATS2	TXNDC15	M6PR	KIF5B	TAPBPL	B3GALNT1
brca.tcga	SLC12A8	ARHGEF2	PDIA5	CKAP4	KDELR3	UAP1	MANSC1	MAGED1	SMPDL3B	OAT	SLC17A5	ALDH18A1	GDPD5	CAPN2	APH1A	MFSD6	CADM4	CTNNB1	EPHA1
coad.gse14333	null
coad.tcga	TCF7L1	XIAP	DLGAP4	FICD	SNTB2	RPS6KA2	EPAS1	ZBTB43	PTPRE	REL	EIF2AK2	ASCC3	MFSD6	CDC42BPA	VASP	IL6R	F8A1	ZNF292	PER2	TACC1	CREB3L2	PILRA	CD82	ZDHHC14	FOXN2	PLEKHA2	SLC4A7	ST3GAL1	CBX1	MAGED1	PORCN	ARHGAP4	MXD1	KLF5
ov.gse9891	HYOU1	RPN2	PDIA4	EDEM2	ALPL	C20orf3	CHKA	PODXL2	PAQR5	MANF	SUV420H1
ov.tcga	null
Top genes:	MAGED1:3	HYOU1:2	RPN2:2	PDIA5:2	MANF:2	PDIA4:2	CKAP4:2	KDELR3:2	SLC12A8:2	MFSD6:2	RPN1:1	KDELR2:1	HSP90B1:1	GORASP2:1	STT3A:1	PRDX4:1	SDF2L1:1	GFPT1:1	SRPRB:1	SSR4:1
50	ID238	4
brca.gse2034	null
brca.tcga	null
coad.gse14333	CIDEC	C6	LIPE	GPD1	LEP	ZBTB16	TIMP4	PC	TNMD	C10orf116	ACSS3
coad.tcga	CIDEA	TTYH1	ADIPOQ	PLIN1	COL11A2	TNNT2	L1CAM	TKTL1	PPP1R1A	KISS1	ECEL1	PPFIA4	LEP	RAB6B	TRIM45
ov.gse9891	PRSS50	NETO2	PLBD1	NRIP3	F12	TKTL1	SYNM	TCP11	SH2D2A	COCH	GIPC2	CYP27B1	SEMA3G	XK	CR2	EPHX3	ICAM2	SLC8A1	RPP25	ALOX12
ov.tcga	PRSS50	SH2D2A	DPEP3	F12	SYCP2	TKTL1	TCP11	NEFH	ACTL8	RPP25	NETO2	NRIP3	PRSS21	IL27RA	CPEB1
Top genes:	TKTL1:3	LEP:2	PRSS50:2	NETO2:2	NRIP3:2	F12:2	TCP11:2	SH2D2A:2	RPP25:2	CIDEC:1	C6:1	LIPE:1	GPD1:1	ZBTB16:1	TIMP4:1	PC:1	TNMD:1	C10orf116:1	ACSS3:1	___348:1
51	ID182	4
brca.gse2034	FXYD3	CLMN	EPS8L2	COBL	SPINT2	PPP1R9A	UNC13B	SHANK2	CACNB3	PACSIN3	CBLC	CNKSR1	PVRL2	TBC1D8	INSR	LYPD3	ERCC1	DUSP8	HOOK1
brca.tcga	YEATS4	CCT2	MDM1	SLC35E3	FRS2	S100G	MDM2	NUP107	H3F3B	PRPSAP1	WDR45L	ABCA5	CDC42EP4	CDKL2	KCNMB3	RAB40B
coad.gse14333	null
coad.tcga	null
ov.gse9891	TARBP2	CDK4	CCT2	ATF1	SMUG1	C12orf44	NAB2	MYL6B	NUP107	PFKM	OBFC2B	RPAP3	ARF3	ITGA7	TFCP2	MARS	CACNB3	PIP4K2C	XPOT	YEATS4	TMEM106C	MDM1	DYRK2	SLC35E3	SLC4A8	MDK	ADAMTS3	DDIT3	HOXC5	HOXC4	ORMDL2	PCBP2	RAB21	KCNMB4	DNAJC22
ov.tcga	SHMT2	DDIT3	MARS	INHBE	ARG2	DMRT1	BLOC1S1	NFE2	SULT1C2	TRIB3	ASB9	GCHFR	DNAJC22	GALNT6	STEAP1B	PFDN5	CHAC1	STC2	GLS2
Top genes:	CACNB3:2	YEATS4:2	CCT2:2	MDM1:2	SLC35E3:2	NUP107:2	MARS:2	DDIT3:2	DNAJC22:2	FXYD3:1	CLMN:1	EPS8L2:1	COBL:1	SPINT2:1	PPP1R9A:1	UNC13B:1	SHANK2:1	PACSIN3:1	CBLC:1	CNKSR1:1
52	ID117	4
brca.gse2034	MEFV	TCTN2	SCD5	ZNF552	PNO1	ZNF43	TAT	CYP26A1	ZMAT4	CD177	IL24	CDSN	PLAC1	ITIH2	CHIT1
brca.tcga	null
coad.gse14333	null
coad.tcga	ZNF701	ZNF14	ZNF614	ZNF239	ZNF480	ZNF550	ZNF137P	DEM1	ZNF83	ZNF32	ZNF222	ZNF544	ZNF586	LCMT2	ZNF140	ZNF8	ZNF22	TGIF1
ov.gse9891	ZNF493	ZNF85	ZNF91	ZNF430	ZNF43	ZNF257	ZNF492	ZNF253	ZNF426	ZNF136	ZNF682	ZNF14	ZNF273	ZNF44	ZNF266
ov.tcga	ZNF43	ZNF85	ZNF14	ZNF430	ZNF492	ZNF91	ZNF273	ZNF257	ZNF493	ZNF107	PGAP1	C5orf42	SPINK5
Top genes:	ZNF43:3	ZNF14:3	ZNF493:2	ZNF85:2	ZNF91:2	ZNF430:2	ZNF257:2	ZNF492:2	ZNF273:2	MEFV:1	TCTN2:1	SCD5:1	ZNF552:1	PNO1:1	TAT:1	CYP26A1:1	ZMAT4:1	CD177:1	IL24:1	CDSN:1
53	ID143	4
brca.gse2034	ARHGAP12	TRA2A	ADNP	TIA1	ZNF217	SCAF8	CSRNP2	ZNF12	MED23	FRYL	TGIF1	SUN1	RBM39	GBAS	KDM3A	SLC38A2	IPP	H2AFV	ZNF323	KIAA0895	SECISBP2L	MARCH6	ZNF273	TAX1BP1	ZFC3H1	SRSF6	PTER	FAM188A	MGA
brca.tcga	null
coad.gse14333	null
coad.tcga	GNB1L	WDR4	DPY19L1	PKP1	PROCR	KCNAB2	MPP6	MACROD1	OR7E24	STYXL1	C7orf63
ov.gse9891	BZW2	NUPL2	EIF3B	KDELR2	ZNF12	RPA3	HEATR2	LSM5	EIF2AK1	GARS	NUDT1	POLD2	CYCS	RALA	GGCT	TOMM7	C7orf44	HNRNPA2B1	TSPAN13	MAD1L1	MPP6	ANKMY2	ICA1	C1GALT1	GBAS	URGCP	YKT6	TRA2A	SCRN1	TMEM106B	PSPH
ov.tcga	MIOS	FTSJ2	EIF3B	NUPL2	HEATR2	ANKMY2	YKT6	GARS	DDX56	ZDHHC4	TAX1BP1	RPA3	MAD1L1	KDELR2	GGCT	LSM5	ZNF12	CHST12	MRPS17	KBTBD2	NUDT1	KLHL7	C1GALT1	TOMM7	TMEM106B	ARL4A	SUN1	H2AFV	SCRN1	POLD2	MPP6	HDAC9	GRB10	BZW2	NFE2L3	RALA	LANCL2	MICALL2	OSBPL3	ITGB8	AHR
Top genes:	ZNF12:3	MPP6:3	TRA2A:2	SUN1:2	GBAS:2	H2AFV:2	TAX1BP1:2	BZW2:2	NUPL2:2	EIF3B:2	KDELR2:2	RPA3:2	HEATR2:2	LSM5:2	GARS:2	NUDT1:2	POLD2:2	RALA:2	GGCT:2	TOMM7:2
54	ID216	4
brca.gse2034	PAK3	CAPN6	TGIF2	IL1R2	ProSAPiP1	PODXL	BAHCC1	PTH2R	DCX	PI3	EPHA4	GFOD1	BCL2L14	ODAM	EPHX3	GABRE	CYP27A1	NOL4	ZDHHC14	PCDH8	SV2B	MAGEA4	STAT5A	STAR
brca.tcga	null
coad.gse14333	null
coad.tcga	DYNC1I1	DLX5	DLX6	GPR64	SH3GL2	ODAM	PGBD5	CABYR	TRIM58	GNAL
ov.gse9891	MAL	VAV3	TSPAN12	CDKN2B	IGFBP3	GFOD1	RAP1GAP	LRRN2	EPHA4	MYO10	CDKN2A	IGFBP5	TSHR	SHMT1	DNAJB2
ov.tcga	FAM134A	DNAJB2	PECR	TMBIM1	AGAP1	TRAK2	STK16	HDAC4	LRRFIP1	SPAG16	MREG
Top genes:	EPHA4:2	GFOD1:2	ODAM:2	DNAJB2:2	PAK3:1	CAPN6:1	TGIF2:1	IL1R2:1	ProSAPiP1:1	PODXL:1	BAHCC1:1	PTH2R:1	DCX:1	PI3:1	BCL2L14:1	EPHX3:1	GABRE:1	CYP27A1:1	NOL4:1	ZDHHC14:1
55	ID34	4
brca.gse2034	CPB1	GRIA2	PRKACB	DCLK1	NUP62CL	ITPR2	LRP2	SSFA2	WFDC2	SLC18A2	FAM129A
brca.tcga	TSPAN8	CYP3A5	TRIM36	GPX2	POF1B	CYP3A7	CYP3A4	CDH7	SNPH	FGF12	DNASE2B	RHOBTB3	ADAM2	PRKACB	GABRA2	PRKAA2	SLC13A4	CYP2J2	HTR1E	TUBB2A	PAGE4
coad.gse14333	ATF3	FOS	NR4A1	ZFP36	DUSP1	EGR1	EGR3	JUNB	NR4A2	FOSB	SIK1	HBEGF	BHLHE40	IER2	C8orf4	MCL1	FOSL2	BTG2	IER3	PPP1R15A	RHOB	TIPARP	SERTAD3	DUSP2	TUBB2A	DNAJB1	JUN	HBB	HSPA6
coad.tcga	null
ov.gse9891	PLD3	RABAC1	SERTAD3	GALNT2	BLVRB	SHC1	CST3	SFT2D2	TCN2	MCL1	ITPKC	GLUL
ov.tcga	null
Top genes:	PRKACB:2	TUBB2A:2	MCL1:2	SERTAD3:2	CPB1:1	GRIA2:1	DCLK1:1	NUP62CL:1	ITPR2:1	LRP2:1	SSFA2:1	WFDC2:1	SLC18A2:1	FAM129A:1	___804:1	___805:1	___806:1	___807:1	___808:1	___809:1
56	ID131	4
brca.gse2034	SHROOM2	USP9X	TRAPPC2	HDHD1	GPR143	MID1IP1	EIF1AX	ALDH5A1	OFD1	SEC61A2
brca.tcga	CHRNA9	GPLD1	KIAA1107	AMHR2	ALDH5A1	BRDT	PI15	HAL	RDH16	TUBAL3
coad.gse14333	null
coad.tcga	SLC27A2	SORD	IVD	ACADSB	SPATA5L1	TAF4B	RPS6KA5	TFRC	MAP2K5	ACAT1	COX11	LDHB	IDH2	ART3	NEO1	AIM1	PAQR5	PCSK6	TRAF3IP2	ZNF215	ALDH5A1	AAGAB
ov.gse9891	EIF1AX	TRAPPC2	RBBP7	TXLNG	MED14	OFD1	PRPS2	PIGA	GEMIN8	PNPLA4	ARSD	HCCS	SHROOM2	CTPS2	EIF2S3	KDM6A	HDHD1	POLA1	PIR	USP9X	RAB9A	PHKA1	SMS	APOO	RPS6KA3	GPR143	STS	GALNT12	SLC27A2	PDHA1	MID1IP1	ELL3	HSD17B12	PMAIP1	MOCOS	LITAF
ov.tcga	null
Top genes:	ALDH5A1:3	SHROOM2:2	USP9X:2	TRAPPC2:2	HDHD1:2	GPR143:2	MID1IP1:2	EIF1AX:2	OFD1:2	SLC27A2:2	SEC61A2:1	___2091:1	___2092:1	___2093:1	___2094:1	___2095:1	___2096:1	___2097:1	___2098:1	___2099:1
57	ID53	4
brca.gse2034	KARS	IST1	VPS4A	C16orf80	NAE1	AARS	CIAPIN1	ATMIN	BRD7	NUTF2	DYNC1LI2	PSMD7	AP1G1	VPS35	NUP93	COQ9	CSNK2A2	FAM96B	TERF2	HSBP1	DNAJA2	CTCF	COX4I1	APRT	CFDP1	SF3B3	CHMP1A	ADAT1	TERF2IP	CBFB	TRAPPC2L	TCF25	RFWD3	SPG7	NUDT21	ANKRD11	SETD6	ELMO3	ZDHHC7	PIEZO1	PHKB	GLG1	PRMT7	CENPT	NETO2	ITFG1	SNTB2	GABARAPL2	GNE
brca.tcga	STXBP6	DMBT1	GCNT1	PIP5K1B	GNE	ABCC4	PDE10A	ASRGL1	PDE4D	MYCN	FGF13	CDC42EP2	SHB
coad.gse14333	null
coad.tcga	null
ov.gse9891	CDK10	MAP1LC3B	TRAPPC2L	ACD	KATNB1	MPHOSPH6	APRT	MLYCD	CFDP1	CSNK2A2	C16orf80	TERF2IP	NIP7	CYB5B	NOL3	GOT2	CBFB	ELMO3	ADAT1	DNAJA2	LCAT	USP10	CENPT	NUDT21	TCF25	KLHDC4	KIAA0182	GALNS	C16orf7	CES2	BRD7	ARL2BP	NUP93	PHKB	TXNL4B	DEF8	RFWD3	SETD6	AMFR
ov.tcga	SLC6A15	FGF13	PCOLCE2	KCNJ8	NBEA	ADAMTS3	NELL2	CR2	SNCAIP	SNCA	RPRM	SACS
Top genes:	C16orf80:2	BRD7:2	NUP93:2	CSNK2A2:2	DNAJA2:2	APRT:2	CFDP1:2	ADAT1:2	TERF2IP:2	CBFB:2	TRAPPC2L:2	TCF25:2	RFWD3:2	NUDT21:2	SETD6:2	ELMO3:2	PHKB:2	CENPT:2	GNE:2	DEF8:2
58	ID33	4
brca.gse2034	DENND2D	FUCA1	ADRB2	BLNK	IRF2	SIDT2	C14orf159	MAN1C1	ATP8A1	FAM111A	TLR3	ST3GAL5	SLFN12	SSBP2	FAM50B
brca.tcga	CDKN2A	THNSL1	OSBPL1A	KDM4D	ELAVL2	GAS2	AKAP3	LRRC42	MTAP	MMACHC	CABYR	SSX2IP	NAV2	ZNF232	PPP1R9A	CRB1	CDKN2B	OR7A5	HSPB11	RNF32	PHLPP1	FGGY	ZZZ3	KLHL9	ACADM	ITGB3BP
coad.gse14333	null
coad.tcga	STAT5A	NAT8B	UBA7	PARP3	BLNK	CTSS	DENND2D	GSDMB	TAPBPL	MMACHC	ASS1	NAT8	IFI27	SULT1C2	ACADM	COL9A2	ERAP1
ov.gse9891	MYCBP	GNL2	DPH2	UTP11L	PPIH	EBNA1BP2	YBX1	NDUFS5	C1orf109	MEAF6	AKIRIN1	NFYC	SNIP1	ERI3	PPCS	MTF1	MED8	RLF	RRAGC	FOXJ3	SF3A3	YRDC	ZMPSTE24	MRPS15	PABPC4	ATP6V0B	DEM1	PTPRF	TRIT1	PPT1	MUTYH	ELOVL1	ZNF643	POMGNT1	CAP1	LRRC42	SCMH1	MYCL1	MACF1	MMACHC	CPT2	NASP	KIAA0494	AK2	ALG6	HECTD3	HSPB11	LRRC41	TESK2
ov.tcga	null
Top genes:	MMACHC:3	DENND2D:2	BLNK:2	LRRC42:2	HSPB11:2	ACADM:2	FUCA1:1	ADRB2:1	IRF2:1	SIDT2:1	C14orf159:1	MAN1C1:1	ATP8A1:1	FAM111A:1	TLR3:1	ST3GAL5:1	SLFN12:1	SSBP2:1	FAM50B:1	___1640:1
59	ID133	4
brca.gse2034	S100A13	NENF	RAB13	S100A14	LEPREL4	ARTN	ACAT1	DEXI	KCNF1	SLC27A5	FKBP10
brca.tcga	TMPRSS3	ZNF238	S100A1	AGT	MTMR11	DYRK3	S100A13	PSORS1C1	KCNK2	BMP8A	CDSN	THBS3	FARP1	CTIF	FABP3	SEMA6C
coad.gse14333	null
coad.tcga	LGALS14	CNGB3	TM7SF2	IL9	HAVCR1	PNLIPRP1	PACSIN3	LAMA5	GDF11	WNT16	DEFB126	TUBB2B	ADRA2C
ov.gse9891	MFAP2	MLLT11	MYO1B	FSCN1	FZD2	TMEM45A	MCAM	SYT11	LEPRE1	SERPINH1	MAP4K4	TMSB15A	ATP8B2	VASH2	TUBB2A	KIF3C	TPST1	SMTN	SNN	CSRNP2	UCHL1	SPATS2	CHSY1	PLIN2	RAI14	NOTCH3	TUBA1A	LEPREL4	SKIL	PDLIM7	CCDC88A	GDF11	FADS1	ZNF281	EPHB2	DNMT3A	CKAP4	LEPREL2	SOX4	CEP170	PLOD1	FKBP1B	CALU	GPX7	PTK7	RAB23	BACH2	IGFBP2	BAG2
ov.tcga	null
Top genes:	S100A13:2	LEPREL4:2	GDF11:2	NENF:1	RAB13:1	S100A14:1	ARTN:1	ACAT1:1	DEXI:1	KCNF1:1	SLC27A5:1	FKBP10:1	___1379:1	___1380:1	___1381:1	___1382:1	___1383:1	___1384:1	___1385:1	___1386:1
60	ID145	4
brca.gse2034	KIF13B	GNG12	PCM1	BNIP3L	CRIM1	ARMCX1	COL4A5	DIXDC1	ZNF395	ASAH1	DYNC1I2	TMEM66	SLC25A12	SYNC	CASD1	MTUS1	SETBP1	RASA1	NAT1	DUSP4	AKAP9	HNMT	CYBRD1	HBP1	PLK2	DOCK1	PSD3	BDH2	THYN1	ARMCX2	ARMCX5	EPHX2	INTS12	NEDD4	RGS5	MYOF	LEPROT	PPP2R2A	LIMCH1	TBX3	RTN1	VWA5A	SEPT10	PRKAR2B	ZBTB16	PTPN13	CYP4B1	PLCL1	SIK3
brca.tcga	TAF13	MAGOH	CTBS	GNG5	GNB5	SEPT10	PDE8A	PIGZ	LEPROT	CCL27
coad.gse14333	null
coad.tcga	null
ov.gse9891	CLEC11A	ITGA2	HSPB8	F3	PRNP	TNFRSF11B	GADD45A	CYP24A1	FERMT1	GALNT14	NPDC1	CA12	NPC2	RAMP1	CLIP4	CRIM1	GNG12	WWC2	FAM98A	LARP6	SNX7	KIAA1199
ov.tcga	RNASE4	BNIP3L	TMEM159	DPYSL2	AOX1	TBC1D8B	PPP1R3C	PRNP	ADRA2A	PNMA2	ANG	JAM2	RORA	HSPB8	FERMT1	WASF3
Top genes:	GNG12:2	BNIP3L:2	CRIM1:2	LEPROT:2	SEPT10:2	HSPB8:2	PRNP:2	FERMT1:2	KIF13B:1	PCM1:1	ARMCX1:1	COL4A5:1	DIXDC1:1	ZNF395:1	ASAH1:1	DYNC1I2:1	TMEM66:1	SLC25A12:1	SYNC:1	CASD1:1
61	ID249	4
brca.gse2034	GALNT3	MPHOSPH6	MICAL3	WASF3	CLDN8	GPR126	ATP1A1	PLCB4	ARFGAP3	HSD17B2	PIP5K1B	PACSIN2	MINA	CMPK1	MFAP3L	BRD1	SLC12A1	ZBED4	ABLIM1	LIPG	ARHGAP44
brca.tcga	null
coad.gse14333	null
coad.tcga	TBL1X	TBL1Y	CTDSPL	PER3	NR1D2	FOXO1	BAHCC1	ADCY9	APPL1	SFMBT1
ov.gse9891	TNNT2	HSPB2	ADCY8	FST	CRYAB	SCG5	KCNB1	FAM70A	TNS1	SPOCK2	DPP6	KLK5	OLFML2A	PER3	RBMS1	ARHGAP44	HRK	UPK3B	AJAP1	FHL1	ZNF556	EDN2	DOCK3
ov.tcga	HSPB2	CRYAB	FST	AQP9	ANXA13	TNNT2	ADCY8	ARHGAP44	DPP6	TRAF5
Top genes:	ARHGAP44:3	PER3:2	TNNT2:2	HSPB2:2	ADCY8:2	FST:2	CRYAB:2	DPP6:2	GALNT3:1	MPHOSPH6:1	MICAL3:1	WASF3:1	CLDN8:1	GPR126:1	ATP1A1:1	PLCB4:1	ARFGAP3:1	HSD17B2:1	PIP5K1B:1	PACSIN2:1
62	ID79	4
brca.gse2034	null
brca.tcga	MAP9	MOCS2	ITGA2	ACSL3	ATP2B1	ATP6V1G1	ARHGAP5	ZBTB6	MMP16	MBIP
coad.gse14333	null
coad.tcga	DAAM1	HSP90AA1	RDH11	ZNF839	SPTLC2	MBIP	ARHGAP5	IL37	MIS18BP1	PPP1R13B	GPHN	PYGL	GDAP1	PFKFB4	SYT17	NDRG1	CALB1	ALDH6A1	PDK1	SLIRP	TPD52	PLEKHG3	MLH3	MFI2	ALDOC	CBX5	NUCKS1	NKX2-1
ov.gse9891	CGRRF1	FKBP3	PAPOLA	C14orf135	PNN	GEMIN2	EXOC5	FAM179B	MOAP1	METTL21D	ARID4A	ARHGAP5	BAG5	PRPF39	DNAAF2	C14orf101	MNAT1	MBIP	ATG14	KIAA0317	SPATA7	PNMA1	SNAPC1	EAPP	KLHDC2	C14orf1	MPP5	L2HGDH	C14orf109	NUBPL	UBR7	RPL36AL	SMEK1	SAV1	PPP1R13B	ALDH6A1	MTA1	SLIRP	RDH11	GPHN	PIGH	DICER1	FBXO34	MTHFD1	DAAM1	SIVA1	C14orf2	ACYP1	HIF1A
ov.tcga	PAPOLA	TMX1	C14orf109	EIF2B2	PSEN1	SRP54	MED6	TDP1	GEMIN2	PPP2R5C	RCOR1	TM9SF1	ALKBH1	SNW1	MPP5	DCAF11	RBM23	MNAT1	EAPP	UBR7	PARP2	GMPR2	GOLGA5	RNF31	EXD2	RDH11	NGDN	MAP4K5	CGRRF1	ZC3H14	PNMA1	PRMT5	GMFB	PPP2R5E	FKBP3	EIF5	SPTSSA	ATP6V1D	MBIP	C14orf169	C14orf135	SCFD1	FAM179B	DNAAF2	DLST	THTPA	SPATA7	METTL21D	ATG14
Top genes:	MBIP:4	ARHGAP5:3	RDH11:3	DAAM1:2	PPP1R13B:2	GPHN:2	ALDH6A1:2	SLIRP:2	CGRRF1:2	FKBP3:2	PAPOLA:2	C14orf135:2	GEMIN2:2	FAM179B:2	METTL21D:2	DNAAF2:2	MNAT1:2	ATG14:2	SPATA7:2	PNMA1:2
63	ID201	4
brca.gse2034	null
brca.tcga	DDX3Y	RPS4Y1	EIF1AY	KDM5D	NLGN4Y	USP9Y	EYA4	C1orf114	NLGN4X	RBFOX1
coad.gse14333	null
coad.tcga	EIF1AY	DDX3Y	KDM5D	UTY	RPS4Y1	ZFY	USP9Y	NLGN4Y	DDX43	TMSB4Y
ov.gse9891	BICD1	PKP2	D4S234E	ID4	CD200	FBXO21	AR	C12orf35	BMPR1B	MEIS1	SOX17	RBFOX1	NPAS3	GRIN2A	MAMLD1	RAB38	WARS2	TYRO3	PRUNE2	SLC27A6	ATF7IP2	RGN	ISOC1	PDYN
ov.tcga	WT1	SOX17	WT1-AS	PTGS1	NUAK2	GPRC5B	LPAR3	MEIS1	SYK	FUT8	FBXO21	NPAS3	LMO4	MYB	MPPED2
Top genes:	DDX3Y:2	RPS4Y1:2	EIF1AY:2	KDM5D:2	NLGN4Y:2	USP9Y:2	RBFOX1:2	FBXO21:2	MEIS1:2	SOX17:2	NPAS3:2	EYA4:1	C1orf114:1	NLGN4X:1	___3029:1	___3030:1	___3031:1	___3032:1	___3033:1	___3034:1
64	ID92	4
brca.gse2034	IGSF3	FNBP1L	DSP	PHF16	MARCKSL1	PTBP2	JARID2	ALDH8A1	HBS1L	LRRC16A	BAMBI	YPEL1	GRHL2	ZHX2	DNMT3B	SSX2IP	FBXO46	OTUD3
brca.tcga	ZNF750	BARX2	SLC39A2	POU2F3	DSP	SH3YL1	EPB41L4B	PPFIBP2	PTPN3	ANK3
coad.gse14333	null
coad.tcga	null
ov.gse9891	ESRP1	CLDN7	SPINT1	EPCAM	ERBB3	OVOL2	CDH1	KRT8	ST14	TMEM30B	ESRP2	KRT19	GALNT3	KLF5	GRHL2	C1orf106	DSP	EPS8L1	PRSS8	RBM47	MYH14	KRT18	S100A14	C19orf21	JUP	ANXA3	LMO7	ABLIM1
ov.tcga	SCNN1A	EPCAM	CLDN7	CLDN4	CLDN3	ESRP1	GALNT3	VAMP8	OVOL2	PRSS8	GRHL2	ERBB3	DSP	ABHD11	NSUN5	POR	MGST2	CD9	PRR15L	WBSCR22	STYXL1	HSPB1
Top genes:	DSP:4	GRHL2:3	ESRP1:2	CLDN7:2	EPCAM:2	ERBB3:2	OVOL2:2	GALNT3:2	PRSS8:2	IGSF3:1	FNBP1L:1	PHF16:1	MARCKSL1:1	PTBP2:1	JARID2:1	ALDH8A1:1	HBS1L:1	LRRC16A:1	BAMBI:1	YPEL1:1
65	ID109	3
brca.gse2034	null
brca.tcga	null
coad.gse14333	null
coad.tcga	PNMA3	GALNT14	COL4A3	EMX2	MAP9	COL4A4	NBEA	DYNC2H1	KCNIP1	FAM184A	FBXL2	TNN	MC1R	C5orf42	NMNAT2	TSPYL4	BNIP3
ov.gse9891	ADM	P4HA1	SPAG4	LDHA	BNIP3	PPFIA4	SLC2A1	HK2	DDIT4	PDK1	ENO2	PGK1	CA9	ERO1L	PLOD2	AK4	ALDOA	NDUFA4L2	NXPH4	SHMT2	PGM1	KDM3A	ANGPTL4	EGLN3	ALDOC	PLTP
ov.tcga	ADM	BNIP3	P4HA1	VEGFA	SPAG4	STC1	SLC2A1	NDUFA4L2	ERO1L	CA9	LDHA	NXPH4	DDIT4	PDK1	GBE1	PFKFB3	ANGPT2
Top genes:	BNIP3:3	ADM:2	P4HA1:2	SPAG4:2	LDHA:2	SLC2A1:2	DDIT4:2	PDK1:2	CA9:2	ERO1L:2	NDUFA4L2:2	NXPH4:2	PNMA3:1	GALNT14:1	COL4A3:1	EMX2:1	MAP9:1	COL4A4:1	NBEA:1	DYNC2H1:1
66	ID111	3
brca.gse2034	ATP8B1	ZNF44	HAUS2	DCLRE1C	LARS	FRMD4A	FNBP4	ZNF248	KIAA0754	ZNF195	HPS5	OGT	CCNL1	GINS4
brca.tcga	null
coad.gse14333	null
coad.tcga	null
ov.gse9891	KIN	GTPBP4	PRPF18	STAM	DHTKD1	NMT2	HSPA14	DCLRE1C	WDR37	SEPHS1	FAM171A1	IDI1	PDSS1	TRDMT1	MLLT10	PITRM1	ECHDC3	ASB13	PFKFB3	PFKP	NET1
ov.tcga	KIN	GTPBP4	STAM	ABI1	RPP38	USP6NL	CDC123	NMT2	HSPA14	DCLRE1C	MTPAP	SEPHS1	WDR37	PDSS1	ZMYND11	UPF2	DHTKD1	PTER	IDI1	PITRM1	ASB13	SEC61A2	ECHDC3	THNSL1	CUL2	TRDMT1	OPTN	RSU1	PRKCQ	ARHGAP12	NET1	MSRB2	PHYH	FAM171A1	KIF5B	PFKP	DIP2C
Top genes:	DCLRE1C:3	KIN:2	GTPBP4:2	STAM:2	DHTKD1:2	NMT2:2	HSPA14:2	WDR37:2	SEPHS1:2	FAM171A1:2	IDI1:2	PDSS1:2	TRDMT1:2	PITRM1:2	ECHDC3:2	ASB13:2	PFKP:2	NET1:2	ATP8B1:1	ZNF44:1
67	ID136	3
brca.gse2034	VDAC2	ANXA7	MRPS16	ADK	ASCC1	VPS26A	ZMIZ1	KIAA1279	DNAJC9	DDX50	SEC24C	PPA1	HK1	GHITM	C10orf57	DLG5	PPIF	SIRT1	DDX21	PCBD1	SUPV3L1	HNRNPH3	ANXA11	PEX6
brca.tcga	null
coad.gse14333	null
coad.tcga	GOLIM4	ANK3	DZIP3	CPT2	EPHX2	IPP	C10orf57	ECHDC2	ECH1	ULK2
ov.gse9891	CAMK2G	PPIF	GHITM	SLC29A3	ADK	ASCC1	PPA1	PCBD1	PPP3CB	ZMIZ1	SAR1A	HPCAL1	SUPV3L1	CISD1	KAT6B	DLG5
ov.tcga	null
Top genes:	ADK:2	ASCC1:2	ZMIZ1:2	PPA1:2	GHITM:2	C10orf57:2	DLG5:2	PPIF:2	PCBD1:2	SUPV3L1:2	VDAC2:1	ANXA7:1	MRPS16:1	VPS26A:1	KIAA1279:1	DNAJC9:1	DDX50:1	SEC24C:1	HK1:1	SIRT1:1
68	ID113	3
brca.gse2034	null
brca.tcga	null
coad.gse14333	null
coad.tcga	ZNF84	RASA1	ZNF654	ITGA2	ZNF10	LPIN1	SMAD5	ZNF354A	PCYOX1L	ZNF33B	ZFP2	CCDC91	PLEKHA8P1
ov.gse9891	TMED7	VDAC1	SEC24A	H2AFY	YIPF5	HSPA9	CLINT1	ZCCHC10	CANX	HSPA4	FEM1C	MAPK9	PGGT1B	MAT2B	MRPL22	CAMLG	CDC23	SAP30L	UBE2D2	SMAD5	COMMD10	CNOT6	REEP5	RAD50	P4HA2	SLC25A46	G3BP1	CTNNA1	PURA	FAM13B	SNX24	ERAP1	LMAN2	GRAMD3	CAST	KDM3B	CLTB	RNF130	LNPEP	SLC22A5	RMND5B	ZNF354A	PANK3	FBXW11	MGAT1	PPIC	KIF3A
ov.tcga	ETF1	RIOK2	RNF14	YIPF5	HDAC3	SNX2	CDC23	CNOT8	RBM22	EIF3J	C15orf44	USP8	MARCH5	ASCC1	TXNDC15	GIN1	PTPLAD1	KIAA1279	DDX46	TAF9	MFAP1	DCTN4	TMED7	RARS	TCTN3	CLPX	CSNK1G3	TAF7	NDUFAF1	NRBF2	KIF2A	SKP1	MAPK9	MRPL46	HSPA4	SPATA5L1	SEC24A	CCNH	WDR61	IDH3A	DTWD1	CNOT6	IMP3	COMMD4	RAD50	PELO	VDAC1	ISOC1	PPWD1
Top genes:	SMAD5:2	ZNF354A:2	TMED7:2	VDAC1:2	SEC24A:2	YIPF5:2	HSPA4:2	MAPK9:2	CDC23:2	CNOT6:2	RAD50:2	ZNF84:1	RASA1:1	ZNF654:1	ITGA2:1	ZNF10:1	LPIN1:1	PCYOX1L:1	ZNF33B:1	ZFP2:1
69	ID139	3
brca.gse2034	null
brca.tcga	null
coad.gse14333	null
coad.tcga	SH3BGR	EIF5A2	CBR1	ATP6V0E2	C9orf9	SOD1	WRB	RGS14	ST6GALNAC4	RWDD2B	IRF5	RCAN1
ov.gse9891	C21orf91	BTG3	CBS	USP16	MRPL39	CHODL	LTN1	PSMG1	USP25	PIGP	SLC5A3	SUMO3	RWDD2B
ov.tcga	C21orf33	PWP2	SUMO3	PSMG1	CRYZL1	IL10RB	WRB	USP25	URB1	USP16	UBE2G2	C21orf59	MIS18A	PIGP	PCNT	IFNAR1	PFKL	BTG3	C21orf91	C2CD2	U2AF1	MRPL39	PTTG1IP	PDXK	TMEM50B	CSTB	RWDD2B	LTN1	CBS	BACE2	RIPK4	N6AMT1	SLC5A3	CHODL	TIAM1	TMPRSS3	GUSB
Top genes:	RWDD2B:3	WRB:2	C21orf91:2	BTG3:2	CBS:2	USP16:2	MRPL39:2	CHODL:2	LTN1:2	PSMG1:2	USP25:2	PIGP:2	SLC5A3:2	SUMO3:2	SH3BGR:1	EIF5A2:1	CBR1:1	ATP6V0E2:1	C9orf9:1	SOD1:1
70	ID74	3
brca.gse2034	STARD3	ERBB2	PGAP3	PSMD3	GRB7	CASC3	WIPF2	MED1	MED24	GSDMB	RPL19	CDK12	ERAL1	CATSPERB	CYB561	SUPT6H	TRAF4	SDF2	PSMB3	LASP1	SPAG5	KIAA0100	LLGL2	RAPGEFL1	GOSR1	CUEDC1	POLDIP2	PCGF2	TMEM97	CPD	CDR2L	ACACA	KIAA0195	NLK	SMARCE1
brca.tcga	KAT2A	MRM1	BRCA1	KRT19	PSMD11	C17orf75	PLEKHH3	KRT33A	AP2B1	TMEM97	SOCS7	JUP	DUSP14	DHRS11	TRAF4	NBR2	NLK	KLHL11
coad.gse14333	null
coad.tcga	null
ov.gse9891	PSMD3	CCDC56	NKIRAS2	MED24	DHX8	COASY	GRB7	FAM134C	PGAP3	PSMB3	TUBG1	ERBB2	DNAJC7	NFE2L1	STAT3	NSF	GSDMB	NBR1	MED1	BCAS3	CDK5RAP3	HEXIM1	MAP3K14	PNPO
ov.tcga	null
Top genes:	ERBB2:2	PGAP3:2	PSMD3:2	GRB7:2	MED1:2	MED24:2	GSDMB:2	TRAF4:2	PSMB3:2	TMEM97:2	NLK:2	STARD3:1	CASC3:1	WIPF2:1	RPL19:1	CDK12:1	ERAL1:1	CATSPERB:1	CYB561:1	SUPT6H:1
71	ID179	3
brca.gse2034	null
brca.tcga	MAGEC2	MAGEA4	MAGEC1	MAGEA10	MAGEA8	MAGEA1	CTAG2	LGSN	DEFB126	MAGEA11	SSX3	GBA3	GNGT1	TYRP1	MAGEB2	ANO3	CNGB3	FABP6
coad.gse14333	null
coad.tcga	LRP4	SATB2	PPM1H	SLC12A2	ETS2	MYB	MLLT3	NUDT4	DEPTOR	ALDH1B1	SOX4	EPHB3	AARSD1	PMFBP1	PDE3B	DAB2	KIAA1324	DBC1	ALDH2	PITX2	CAMK1D	SLC2A4	EEA1	GALNT6	SUOX	FABP6	CCDC53	MYCL1	SPAG1	MAGEA11	SHC3	DDO	RAB15	SYBU	WT1	SLC4A8	KCNA2	WEE1	SLCO5A1	PGAP1
ov.gse9891	MAGEA1	MAGEA4	MAGEA10	MAGEA11	CTAG2	NAA11	SAGE1	MAGEC1	TPTE	PAGE4	MAGEC2	MAGEB2	AURKC	KRT12
ov.tcga	null
Top genes:	MAGEA11:3	MAGEC2:2	MAGEA4:2	MAGEC1:2	MAGEA10:2	MAGEA1:2	CTAG2:2	MAGEB2:2	FABP6:2	MAGEA8:1	LGSN:1	DEFB126:1	SSX3:1	GBA3:1	GNGT1:1	TYRP1:1	ANO3:1	CNGB3:1	___2485:1	___2486:1
72	ID273	3
brca.gse2034	AACS	ASL	GUSB	GOLGA3	DNAJB2	NQO2	WDR13	FGGY	ETFB	UXT	GMPPA
brca.tcga	null
coad.gse14333	null
coad.tcga	null
ov.gse9891	LIAS	ACYP2	KCNMB2	FGGY	CCBL2	ACSM3	ERMAP	FAM13A	APH1B	KRCC1	CORO2B	BAALC	CCDC53
ov.tcga	TP53TG1	KRCC1	TRMT1L	CCT6B	CDKL3	SH3BGR	FGGY	LYRM1	FMO4	SRI	BCL2L14	PEX12	SKAP1	LIAS	HHLA3	ORAI3	FHIT	PSPH	CROT	KLRF1	THNSL2	BDH1
Top genes:	FGGY:3	LIAS:2	KRCC1:2	AACS:1	ASL:1	GUSB:1	GOLGA3:1	DNAJB2:1	NQO2:1	WDR13:1	ETFB:1	UXT:1	GMPPA:1	___1934:1	___1935:1	___1936:1	___1937:1	___1938:1	___1939:1	___1940:1
73	ID204	3
brca.gse2034	STOML2	CLTA	DNAJA1	POLR1E	CCT7	SECTM1	TMEM51	GMPR	ARHGEF10L	GALT	ZBTB5	VCP	AUP1	CNP	PSMC4
brca.tcga	null
coad.gse14333	WDR7	C14orf159	NFIC	EPHA4	GNAI1	OXCT1	ARSJ	MAPRE2	CDKN2C	KCNN2	SOCS2	ST5	FRMD4B	CD200	KCTD15	ECI2	CBR3	GMPR	KIAA0922	PIK3R3	NT5DC3	FGFR2	NEDD9	ARNT2	NRTN	SRR	ARHGEF3	ZNF189	SERPINA3
coad.tcga	null
ov.gse9891	OXCT1	NFIB	PIK3R1	COL21A1	REEP1	PTN	LRRC2	NPR3	CDKN2C	SMPX	TPPP
ov.tcga	null
Top genes:	GMPR:2	OXCT1:2	CDKN2C:2	STOML2:1	CLTA:1	DNAJA1:1	POLR1E:1	CCT7:1	SECTM1:1	TMEM51:1	ARHGEF10L:1	GALT:1	ZBTB5:1	VCP:1	AUP1:1	CNP:1	PSMC4:1	___1899:1	___1900:1	___1901:1
74	ID242	3
brca.gse2034	null
brca.tcga	null
coad.gse14333	null
coad.tcga	TCP11	SOX30	SYNGR3	SLC16A8	GRIN2C	UPB1	GPC3	MAT1A	FAM173A	FOXRED2	PODXL2	YBX2
ov.gse9891	PCDH8	ZNF536	LHX2	OLFM4	GPC3	L1TD1	SV2A	SLC6A16	ATP8A2	CDKL2
ov.tcga	PENK	HEY1	GPC3	PCDH8	WIF1	DLX5	ACTC1	OLFM4	WNT5B	DYNC1I1	TAC1	TNMD
Top genes:	GPC3:3	PCDH8:2	OLFM4:2	TCP11:1	SOX30:1	SYNGR3:1	SLC16A8:1	GRIN2C:1	UPB1:1	MAT1A:1	FAM173A:1	FOXRED2:1	PODXL2:1	YBX2:1	___3973:1	___3974:1	___3975:1	___3976:1	___3977:1	___3978:1
75	ID75	3
brca.gse2034	null
brca.tcga	null
coad.gse14333	TM4SF20	MTTP	AKR1C3	AKR1C4	ABCG2	SLC7A9	XPNPEP2	DENND5B	CYP27A1	TM4SF4	C1orf21	SLC22A4
coad.tcga	SLC7A9	MTTP	TM4SF20	AKR1C4	GPD1	CDH16	AADAC	LRCH1	AATK	GRK5
ov.gse9891	RBM42	TBCB	TMEM147	COX6B1	POLR2I	PSMC4	LSM14A	GPATCH1	UBA2	ZNF146	CEBPG	ANKRD27	LIN37	PSMD8	RYR1	PDCD5	ZNF571	MRPS12	SARS2	ECH1	KIAA0355	EIF3K	MAP4K1	PAF1	ZFP30	SUPT5H	RAE1	SPINT2	PIGT	POP4	C20orf20	PEPD	PAK4	UQCRFS1	ZNF302	CSE1L	LSR	SLC7A9	FBXO17	CCNE1	CAPNS1	FBL	ACTN4	SPATA2	LRFN3	GPI	TH1L	SYCP2	TTI1
ov.tcga	null
Top genes:	SLC7A9:3	TM4SF20:2	MTTP:2	AKR1C4:2	AKR1C3:1	ABCG2:1	XPNPEP2:1	DENND5B:1	CYP27A1:1	TM4SF4:1	C1orf21:1	SLC22A4:1	___240:1	___241:1	___242:1	___243:1	___244:1	___245:1	___246:1	___247:1
76	ID241	3
brca.gse2034	null
brca.tcga	null
coad.gse14333	IFITM3	TGM2	CEBPB	IFITM2	NOD2	ASAP1	IFITM1	GRINA	STMN3	GZMB	SCRN1	PLTP	MERTK	AMOTL2	C2
coad.tcga	FBXO2	NOD2	PLTP	DENND5B	CYP27A1	MYO7A	HMHA1	NAALADL1	EDA	DENND1C	CERK	CARD9	SLC9A3R1	KHK	FTL	CPPED1	PEPD	LTF	SH3D21	SLC17A9
ov.gse9891	SLC44A4	ST6GAL1	GCHFR	ATP6V0D1	CYB5R3	TNFRSF12A	RHOC	CPPED1	GPR56	CHST4
ov.tcga	null
Top genes:	NOD2:2	PLTP:2	CPPED1:2	IFITM3:1	TGM2:1	CEBPB:1	IFITM2:1	ASAP1:1	IFITM1:1	GRINA:1	STMN3:1	GZMB:1	SCRN1:1	MERTK:1	AMOTL2:1	C2:1	___205:1	___206:1	___207:1	___208:1
77	ID51	3
brca.gse2034	ZCCHC10	CETN3	DHX29	ANKRA2	ATF1	RALGAPA1	DMXL1	C14orf135	NDUFA5	ERBB2IP	SEC24B	SACM1L	SLTM	EFHA1	C5orf44	UHRF1BP1L	SLK	GIN1	NARG2	XPA	RNF111	WDR11	ARL1	FAM179B	CDC23	TM2D1	FBXL5	EXOC1	C5orf15	UNC50	ZFYVE16	TCF12	NEK4	CHUK	MINPP1	IBTK	FPGT	TRMT1L	FAM13B	LAMTOR3	FBXO3	APPL1	WDR44	NDUFB1	BBS10	COPS4	UBA3	FUBP3	ACTR10
brca.tcga	null
coad.gse14333	null
coad.tcga	ZMAT3	CDKN1A	GDF15	CYFIP2	PHLDA3	AEN	GADD45A	HHAT	PDE11A	TREH
ov.gse9891	NSA2	PPWD1	ANKRA2	CDK7	RASA1	ZFYVE16	CETN3	MRPS27	TTC37	SREK1IP1	CHD1	PPIP5K2	CCNH	SKIV2L2	C5orf44	DIMT1	TRIM23	NDUFS4	KIF2A	PJA2	DHX29	COL4A3BP	WDR41	HMGCR	OCLN	DMXL1	SSBP2	XRCC4	MCCC2	MOCS2	PELO	NAIP	C5orf30	F2RL1	CYFIP2	MAP3K1
ov.tcga	null
Top genes:	CETN3:2	DHX29:2	ANKRA2:2	DMXL1:2	C5orf44:2	ZFYVE16:2	CYFIP2:2	ZCCHC10:1	ATF1:1	RALGAPA1:1	C14orf135:1	NDUFA5:1	ERBB2IP:1	SEC24B:1	SACM1L:1	SLTM:1	EFHA1:1	UHRF1BP1L:1	SLK:1	GIN1:1
78	ID84	3
brca.gse2034	RNF38	KLHL9	SMARCA2	RPS6	CDC37L1	RRAGA	DENND4C	RANBP6	PHF2	MPDZ	MLLT3	SMARCA1	MXI1
brca.tcga	COLEC12	CLUL1	SLC6A4	NAV3	DLX2	ANO2	SMARCA1	IFT74	CNGA3	MPDZ	GRIK1	BLMH	UCP1	NTF3	ADRA1B	HTR1F	SOCS6	ERMP1
coad.gse14333	null
coad.tcga	null
ov.gse9891	HAUS6	RANBP6	TOPORS	RRAGA	CDC37L1	KIAA0020	DENND4C	RCL1	CHMP5	PSIP1	DNAJA1	MTAP	ERMP1	SNAPC3	KLHL9	KANK1	MLLT3	IFT74	VLDLR	UBAP2	FANCG	SIGMAR1	SLC1A1	UNC13B	GCNT1	TLE1	IDH1
ov.tcga	null
Top genes:	KLHL9:2	CDC37L1:2	RRAGA:2	DENND4C:2	RANBP6:2	MPDZ:2	MLLT3:2	SMARCA1:2	IFT74:2	ERMP1:2	RNF38:1	SMARCA2:1	RPS6:1	PHF2:1	MXI1:1	___1782:1	___1783:1	___1784:1	___1785:1	___1786:1
79	ID237	3
brca.gse2034	IL17RB	ZNF24	CNNM3	SLC1A4	ST6GALNAC2	OSBPL1A	ZNF271	HOMER2	WDR73	NEO1	MYH10
brca.tcga	null
coad.gse14333	null
coad.tcga	null
ov.gse9891	SPON1	CDH6	GUCY1B3	ADAMTS1	BHLHE41	ST6GALNAC2	ODZ4	PART1	HIVEP2	MXRA7	CHL1	MYOF	SLC38A2	PTX3	IL1RAP	CLDN16	CFI	DIRAS2	PIPOX	SSPN	BANK1	MFGE8	NUAK2	SLC38A1	GDPD5
ov.tcga	PAX8	LRRN2	MYO10	ARL4C	FGF18	RAP1GAP	ZHX2	GTF2IRD1	EMX2	CELSR2	BCAM	DAAM1	WNT7A	CDH6	MAL	COL18A1	MFGE8	SLC38A1	KIAA1199	EPHA4	LAMA5	ODZ4	OSBPL10	SLC48A1	RAPGEF3	EPS8L1	LMO3	ITGB5	ALK	TRHDE	SNTB1	SLC38A2
Top genes:	ST6GALNAC2:2	CDH6:2	ODZ4:2	SLC38A2:2	MFGE8:2	SLC38A1:2	IL17RB:1	ZNF24:1	CNNM3:1	SLC1A4:1	OSBPL1A:1	ZNF271:1	HOMER2:1	WDR73:1	NEO1:1	MYH10:1	___1497:1	___1498:1	___1499:1	___1500:1
80	ID243	3
brca.gse2034	null
brca.tcga	CHRNA3	WFDC1	KLK1	CRLF1	JPH3	ITGB1BP2	SLC5A3	EYA2	DENND2A	SUSD5	PRUNE2	BMP7	JAKMIP2	LRP4	DPYSL4	TMEM59L	KCNJ6	SIM2
coad.gse14333	null
coad.tcga	null
ov.gse9891	SCGB2A1	SCGB1D2	ASRGL1	RAI2	EYA2	PALMD	PRKX	TGFBR3	HOMER2	ECHDC2	MOCS1	ME3
ov.tcga	SCGB2A1	ASRGL1	SCGB1D2	DEPTOR	OVGP1	SPDEF	EPB41L2	KIAA1324	ANO1	SYBU	EYA2	WDR77	SCGB1D1	ALPP	NRIP1	ALPPL2	NRTN	SLC47A1
Top genes:	EYA2:3	SCGB2A1:2	SCGB1D2:2	ASRGL1:2	CHRNA3:1	WFDC1:1	KLK1:1	CRLF1:1	JPH3:1	ITGB1BP2:1	SLC5A3:1	DENND2A:1	SUSD5:1	PRUNE2:1	BMP7:1	JAKMIP2:1	LRP4:1	DPYSL4:1	TMEM59L:1	KCNJ6:1
81	ID290	3
brca.gse2034	null
brca.tcga	null
coad.gse14333	null
coad.tcga	RASSF9	CASP4	PON2	NTS	PON3	FLRT3	FKBP11	NFE2	CASP5	CFI	DNAJB9	MBNL3
ov.gse9891	APOA1	IMPG2	PON1	TEC	DSC2	DSC1	PON3	DGKG	TXK	PDE3A	PHOX2A
ov.tcga	DPYSL3	ZFPM2	CFI	SERPING1	FAM70A	PROS1	GSN	BNC2	ITIH5	NXN	ANXA3	FHL1	SYNDIG1
Top genes:	PON3:2	CFI:2	RASSF9:1	CASP4:1	PON2:1	NTS:1	FLRT3:1	FKBP11:1	NFE2:1	CASP5:1	DNAJB9:1	MBNL3:1	___4180:1	___4181:1	___4182:1	___4183:1	___4184:1	___4185:1	___4186:1	___4187:1
82	ID67	3
brca.gse2034	HIST1H3D	HIST1H2BK	HIST1H1C	HIST1H4H	HIST1H2BD	HIST1H2AE	HIST2H2BE	HIST1H2BG	HIST1H2AM	C4orf19
brca.tcga	null
coad.gse14333	null
coad.tcga	null
ov.gse9891	HIST1H3D	HIST1H2AM	HIST1H2BK	HIST1H1C	HIST1H4H	HIST1H2AE	HIST1H2BD	HIST2H2BE	HIST1H2BG	HIST1H4E	HIST1H3B	H2AFJ	MAGEA8
ov.tcga	HIST1H1C	HIST1H3D	HIST1H2AE	HIST1H4H	HIST1H2BK	HIST1H2AM	HIST1H2BD	HIST2H2BE	HIST1H2BG	DPM3	PMVK	MRPL24	BOLA1
Top genes:	HIST1H3D:3	HIST1H2BK:3	HIST1H1C:3	HIST1H4H:3	HIST1H2BD:3	HIST1H2AE:3	HIST2H2BE:3	HIST1H2BG:3	HIST1H2AM:3	C4orf19:1	___1097:1	___1098:1	___1099:1	___1100:1	___1101:1	___1102:1	___1103:1	___1104:1	___1105:1	___1106:1
83	ID58	2
brca.gse2034	null
brca.tcga	null
coad.gse14333	null
coad.tcga	null
ov.gse9891	ABCF1	TAF11	BAG6	NUP153	LSM2	RDBP	EHMT2	JARID2	TDP2	PPP1R11	ZKSCAN4	MRS2	KLHDC3	NOL7	RANBP9	E2F3	ANKS1A	FTSJD2	ZSCAN16	TRIM27	BYSL	TBCC	ZNF184	MED20	GTPBP2	MEA1	RGL2	TUBB	BRD2	CDYL	PRPF4B	YIPF3	ZNF318	C6orf130	C6orf62	FAM8A1	NFYA	PAK1IP1	ZNF193	TMEM14B	STK38	ATAT1	CNPY3	CCDC90A	KIAA0240	ACOT13	EEF1E1	MAPK14	ZNF187
ov.tcga	ZKSCAN4	SNRPC	TAF11	ZNF184	YIPF3	ABT1	TRIM27	ABCF1	RANBP9	MRS2	NUP153	WDR46	C6orf62	BYSL	MRPS10	POLR1C	ZNF318	MRPS18A	BTN2A1	ZSCAN16	C6orf130	CEP76	TDP2	KLHDC3	FARS2	MAD2L1BP	ZNF187	DAXX	GMNN	PRPF4B	SEH1L	LSM2	SSR1	GTPBP2	SMAD4	TBCC	GTF2H4	SLC39A7	CCDC90A	MRPS18B	CHMP1B	UBR2	CNPY3	PRR3	SLC29A1	EXOC2	ZNF165	PIK3C3	SNRPD1
Top genes:	ABCF1:2	TAF11:2	NUP153:2	LSM2:2	TDP2:2	ZKSCAN4:2	MRS2:2	KLHDC3:2	RANBP9:2	ZSCAN16:2	TRIM27:2	BYSL:2	TBCC:2	ZNF184:2	GTPBP2:2	PRPF4B:2	YIPF3:2	ZNF318:2	C6orf130:2	C6orf62:2
84	ID260	2
brca.gse2034	null
brca.tcga	null
coad.gse14333	null
coad.tcga	TTR	FXYD2	SOAT2	NEB	ABCC2	FGB	SULT1E1	HPN	NRCAM	POU6F2	NEUROD1	GNGT1	NPC1L1	SYT1	CALCR	PLCB1	GPER	SH3TC1	ZDHHC8P1	IGFALS	ITGA9	GABRR1
ov.gse9891	HIF3A	CAD	CACNA2D2	KIF1A	PNMA3	COL9A2	NR2F6	ODC1	PLAC1	NELL1	PLAGL2	BMP7	PTMS	SLC6A8	TNNI1	GNGT1	CLSTN3	E2F6	SYT13	CDH18	VAX2	FXYD7	LGSN	SSBP3	LGR5	AGBL5	GPR20	FXYD1	KCNG1	ACP1	FBXO2	CERS4	SPINK5	SLC5A6	CLDN9	STEAP1B	DUSP9	PGAM2	SIX3	IL11RA	LMO3	IGF2BP3	ABCC5	ALK	PTH2R	SULT1C2	MYOZ1	PDIA6	PRKAB2
ov.tcga	null
Top genes:	GNGT1:2	TTR:1	FXYD2:1	SOAT2:1	NEB:1	ABCC2:1	FGB:1	SULT1E1:1	HPN:1	NRCAM:1	POU6F2:1	NEUROD1:1	NPC1L1:1	SYT1:1	CALCR:1	PLCB1:1	GPER:1	SH3TC1:1	ZDHHC8P1:1	IGFALS:1
85	ID110	2
brca.gse2034	null
brca.tcga	C19orf60	STT3A	HIPK2	KCNJ14	C11orf57	DCPS	GAL3ST1	GTPBP3	ATF5	ZSCAN5A	GNB1L	FBXO24	CDH15	USP36	HYAL3	CADM1	RHCE	EXPH5
coad.gse14333	null
coad.tcga	null
ov.gse9891	RAB6A	DHX9	ATF2	TMED2	GTF2I	HIPK3	C19orf6	ACTR2	COPA	STIP1	SEC61A1	ARPC4	MAT2A	MOCS3	BSG	STT3A	SUPT16H	NUTF2	PRPF6	TM9SF4	ZNF192	SRPR	SCYL2	HNRNPH1	SLC39A7	BCL2L1	TWF1	PPIB	EML4	ESR1	NUMA1	RPN1	HNRNPL	STX16	TOMM22	LSM12	VASP	CD46	C9orf38	MARCH6	CTNNB1	DNAJC17	RTN3	THOC6	ERLIN1	PPFIBP1	ZNF208	CNN3	PTPN12
ov.tcga	null
Top genes:	STT3A:2	C19orf60:1	HIPK2:1	KCNJ14:1	C11orf57:1	DCPS:1	GAL3ST1:1	GTPBP3:1	ATF5:1	ZSCAN5A:1	GNB1L:1	FBXO24:1	CDH15:1	USP36:1	HYAL3:1	CADM1:1	RHCE:1	EXPH5:1	___3388:1	___3389:1
86	ID218	2
brca.gse2034	null
brca.tcga	null
coad.gse14333	null
coad.tcga	GRAMD1C	N4BP2L1	PARD6A	LYRM1	NME3	RASL10A	TMEM80	CD47	LIME1	IFT57	RBKS	DLEU1	HTATIP2	NOL3	FOXJ1	TEX12
ov.gse9891	STXBP3	AGL	AHCYL1	RWDD3	WDR77	VANGL1	CCDC76	GCLM	KIAA1107	SLC35A3	LRRC8D	PSMA5	DENND2D	WDR47	SORT1	LRIF1	ABCD3	DPH5	RABGGTB	LMO4	PHTF1	GRAMD1C	MAN1A2
ov.tcga	null
Top genes:	GRAMD1C:2	N4BP2L1:1	PARD6A:1	LYRM1:1	NME3:1	RASL10A:1	TMEM80:1	CD47:1	LIME1:1	IFT57:1	RBKS:1	DLEU1:1	HTATIP2:1	NOL3:1	FOXJ1:1	TEX12:1	___4747:1	___4748:1	___4749:1	___4750:1
87	ID142	2
brca.gse2034	FAH	CIB1	TMED3	GALE	PIK3R3	SQRDL	AKR1A1	DIO1	NUPR1	INPP5A	UROS	ECHS1	AMDHD2	PBX3	MFSD7	GCHFR	C16orf62
brca.tcga	null
coad.gse14333	null
coad.tcga	null
ov.gse9891	RAB11A	ETFA	TMOD3	MAP2K1	BTBD1	DENND4A	EFTUD1	CLPX	MRPL46	IDH3A	NGRN	USP3	COX5A	NPTN	MRPS11	SPATA5L1	NARG2	SNRPA1	SNUPN	DUT	TM2D3	RSL24D1	BNIP2	ADAM10	MPI	RFX7	IQGAP1	TSPAN3	MAN2A2	WDR73	TIPIN	CIB1	DET1	EID1	LCMT2	SCAPER	FAH	AVEN	SECISBP2L	TMED3	RNF111	PARP6	PIGB	PPCDC	TUBGCP4	EHD4	FAM63B	SMAD6	THAP10
ov.tcga	null
Top genes:	FAH:2	CIB1:2	TMED3:2	GALE:1	PIK3R3:1	SQRDL:1	AKR1A1:1	DIO1:1	NUPR1:1	INPP5A:1	UROS:1	ECHS1:1	AMDHD2:1	PBX3:1	MFSD7:1	GCHFR:1	C16orf62:1	___1064:1	___1065:1	___1066:1
88	ID198	2
brca.gse2034	null
brca.tcga	null
coad.gse14333	null
coad.tcga	VNN1	SERPINB3	SERPINB7	LAIR2	GPR110	RARRES1	IFNGR1	ABCG2	BDKRB1	CLCA3P	LPCAT1	TPK1	BDKRB2	PRSS1	NLRP2	HSD17B11
ov.gse9891	TM4SF4	DPP4	HNF1B	STK32B	SLC22A3	PLA1A	GLS	VNN1	GAL3ST1	CDH16	LGALS14
ov.tcga	null
Top genes:	VNN1:2	SERPINB3:1	SERPINB7:1	LAIR2:1	GPR110:1	RARRES1:1	IFNGR1:1	ABCG2:1	BDKRB1:1	CLCA3P:1	LPCAT1:1	TPK1:1	BDKRB2:1	PRSS1:1	NLRP2:1	HSD17B11:1	___3939:1	___3940:1	___3941:1	___3942:1
89	ID287	2
brca.gse2034	null
brca.tcga	null
coad.gse14333	null
coad.tcga	SLCO4A1	NELF	MLXIPL	RBM38	IRS2	SLC9A3	GAS6	CPNE7	LRIG1	CEP72	ALDH4A1
ov.gse9891	LPAR3	GPRC5B	PRKCI	ATP2B4	FUT8	UBE2H	TGIF2	NAB1	CHD7	TBL1XR1	CCDC6	LRIG1	TIAM1	SEMA3F
ov.tcga	null
Top genes:	LRIG1:2	SLCO4A1:1	NELF:1	MLXIPL:1	RBM38:1	IRS2:1	SLC9A3:1	GAS6:1	CPNE7:1	CEP72:1	ALDH4A1:1	___4781:1	___4782:1	___4783:1	___4784:1	___4785:1	___4786:1	___4787:1	___4788:1	___4789:1
90	ID293	2
brca.gse2034	null
brca.tcga	null
coad.gse14333	BACE2	KLK11	GJB5	GABRP	GLRX	PRSS12	TRIM29	ALDH3A2	AK1	CATSPERB	PRODH	ALDH3A1	MARCH3
coad.tcga	null
ov.gse9891	RIPK4	TMPRSS3	BACE2	C2CD2	PTPRU	C6orf123	EPB41L4A	WWC1	ZDHHC13	RORC	IL1RL2	C21orf33	ATP1A1	NEBL	SCD5
ov.tcga	null
Top genes:	BACE2:2	KLK11:1	GJB5:1	GABRP:1	GLRX:1	PRSS12:1	TRIM29:1	ALDH3A2:1	AK1:1	CATSPERB:1	PRODH:1	ALDH3A1:1	MARCH3:1	___486:1	___487:1	___488:1	___489:1	___490:1	___491:1	___492:1
91	ID72	2
brca.gse2034	null
brca.tcga	null
coad.gse14333	null
coad.tcga	COX7B	COX7C	THAP10	RPLP1	LRRC49	RINT1	ST20	NEBL	B9D2	RPS24
ov.gse9891	BCAP31	NSDHL	NAA10	IRAK1	SLC10A3	TMEM187	FAM3A	ATP6AP1	UBL4A	SLC25A5	IL13RA1	BRCC3	FAM50A	VBP1	F8A1	EMD	HPRT1	MTM1	SSR4	MTCP1	NDUFA1	LAGE3	FMR1	SLC9A6	DKC1	UBE2A	MTMR1	COX7B	C1GALT1C1	GDI1	RNF113A	ELF4	G6PD	HAUS7	WDR44	F8	PLXNA3	ZNF75D	HTATSF1	ABCD1	AIFM1	FAM127B	LAMP2	RAP2C	NQO1	SIL1	CBR1	IDS	HTR3A
ov.tcga	null
Top genes:	COX7B:2	COX7C:1	THAP10:1	RPLP1:1	LRRC49:1	RINT1:1	ST20:1	NEBL:1	B9D2:1	RPS24:1	___5290:1	___5291:1	___5292:1	___5293:1	___5294:1	___5295:1	___5296:1	___5297:1	___5298:1	___5299:1
92	ID155	2
brca.gse2034	MANSC1	SORBS2	OAT	ACYP2	ADI1	SH3YL1	VPS54	RAPGEF5	HHLA3	RGS10
brca.tcga	null
coad.gse14333	null
coad.tcga	null
ov.gse9891	BCCIP	NSMCE4A	CTBP2	PPRC1	WDR11	CUTC	CHUK	FAM175B	C10orf88	PLEKHA1	MGEA5	INPP5A	UROS	TRIM8	FBXL15	BUB3	MMS19	FGFR2	NOLC1	ECHS1	BTAF1	ACADSB	NOC3L	C10orf2	DCLRE1A	FRAT2	MGMT	TAF5	FAM53B	CASP7	KIAA1598	MTG1	GSTO1	ARHGAP19	SLK	PTEN	SEC31B	TMEM180	LHPP	OAT	FRAT1	BAG3	ANXA11	LDB1	TACC2	ADD3	GLUD1	C10orf118
ov.tcga	null
Top genes:	OAT:2	MANSC1:1	SORBS2:1	ACYP2:1	ADI1:1	SH3YL1:1	VPS54:1	RAPGEF5:1	HHLA3:1	RGS10:1	___1536:1	___1537:1	___1538:1	___1539:1	___1540:1	___1541:1	___1542:1	___1543:1	___1544:1	___1545:1
93	ID59	1
brca.gse2034	null
brca.tcga	null
coad.gse14333	null
coad.tcga	null
ov.gse9891	PRMT5	GMPR2	IPO4	METTL17	OXA1L	APEX1	METTL3	CHD8	RNF31	TM9SF1	PARP2	AP1G2	THTPA	CHMP4A	HAUS4	CCNB1IP1	LRP10	RABGGTA	DHRS1	NDRG2	PCK2	ARHGEF40
ov.tcga	null
Top genes:	PRMT5:1	GMPR2:1	IPO4:1	METTL17:1	OXA1L:1	APEX1:1	METTL3:1	CHD8:1	RNF31:1	TM9SF1:1	PARP2:1	AP1G2:1	THTPA:1	CHMP4A:1	HAUS4:1	CCNB1IP1:1	LRP10:1	RABGGTA:1	DHRS1:1	NDRG2:1
94	ID83	1
brca.gse2034	null
brca.tcga	null
coad.gse14333	null
coad.tcga	null
ov.gse9891	PRPF8	NUP88	DERL2	MIS12	C17orf81	C1QBP	ITGAE	SGSM2	ZNF232	CRK	PFAS	ACADVL	RNMTL1	YWHAE	MPDU1	PITPNA	SRR	TRPV1	CHRNB1	RAP1GAP2	C2orf43
ov.tcga	null
Top genes:	PRPF8:1	NUP88:1	DERL2:1	MIS12:1	C17orf81:1	C1QBP:1	ITGAE:1	SGSM2:1	ZNF232:1	CRK:1	PFAS:1	ACADVL:1	RNMTL1:1	YWHAE:1	MPDU1:1	PITPNA:1	SRR:1	TRPV1:1	CHRNB1:1	RAP1GAP2:1
95	ID130	1
brca.gse2034	null
brca.tcga	null
coad.gse14333	null
coad.tcga	null
ov.gse9891	CCNC	SENP6	PDSS2	FIG4	ATG5	HSF2	FBXL4	UFL1	MTO1	ZNF292	IBTK	KATNA1	PEX3	MAP3K7	PHIP	PNISR	CD164	QRSL1	PREP	SERINC1	ASCC3	TBPL1	CASP8AP2	RWDD2A	RNF146	TMEM30A	ECHDC1	HDDC2	IGF2R	TRMT11	PTPRK	MAP3K4	MYO6	C6orf120	ORC3	PEX7	CCDC28A	HECA	PGM3	SCAF8	MAP7	TSPYL4	SLC35A1	RMND1	MUT	PDCD2	NDUFAF4	C6orf211	CITED2
ov.tcga	null
Top genes:	CCNC:1	SENP6:1	PDSS2:1	FIG4:1	ATG5:1	HSF2:1	FBXL4:1	UFL1:1	MTO1:1	ZNF292:1	IBTK:1	KATNA1:1	PEX3:1	MAP3K7:1	PHIP:1	PNISR:1	CD164:1	QRSL1:1	PREP:1	SERINC1:1
96	ID137	1
brca.gse2034	null
brca.tcga	null
coad.gse14333	null
coad.tcga	DNAH3	ULBP1	MSTN	HECW1	PPFIA2	ANKS1B	GNRHR	USH2A	TEX13A	FHL5	EDA2R	REG1P	LIPF
ov.gse9891	null
ov.tcga	null
Top genes:	DNAH3:1	ULBP1:1	MSTN:1	HECW1:1	PPFIA2:1	ANKS1B:1	GNRHR:1	USH2A:1	TEX13A:1	FHL5:1	EDA2R:1	REG1P:1	LIPF:1	___4889:1	___4890:1	___4891:1	___4892:1	___4893:1	___4894:1	___4895:1
97	ID144	1
brca.gse2034	null
brca.tcga	null
coad.gse14333	null
coad.tcga	null
ov.gse9891	VPS4B	PIGN	WDR7	SOCS6	SMAD7	MALT1	SLC39A6	KDSR	POLI	ZNF532	CYB5A	ME2	LMAN1	RPRD1A	ZCCHC2
ov.tcga	null
Top genes:	VPS4B:1	PIGN:1	WDR7:1	SOCS6:1	SMAD7:1	MALT1:1	SLC39A6:1	KDSR:1	POLI:1	ZNF532:1	CYB5A:1	ME2:1	LMAN1:1	RPRD1A:1	ZCCHC2:1	___7014:1	___7015:1	___7016:1	___7017:1	___7018:1
98	ID153	1
brca.gse2034	PIK3R4	NDUFB4	MRPL3	HLTF	MRPS22	RNF7	NIT2	COX17	TFDP2	RUVBL1	TOMM70A	PCCB	GTF2E1	FAIM	FAM162A	C3orf37	CEP70	LSG1	NCBP2	GYG1	PAK2	VPS8	FXR1	FAM131A	ZXDC
brca.tcga	null
coad.gse14333	null
coad.tcga	null
ov.gse9891	null
ov.tcga	null
Top genes:	PIK3R4:1	NDUFB4:1	MRPL3:1	HLTF:1	MRPS22:1	RNF7:1	NIT2:1	COX17:1	TFDP2:1	RUVBL1:1	TOMM70A:1	PCCB:1	GTF2E1:1	FAIM:1	FAM162A:1	C3orf37:1	CEP70:1	LSG1:1	NCBP2:1	GYG1:1
99	ID227	1
brca.gse2034	null
brca.tcga	null
coad.gse14333	null
coad.tcga	null
ov.gse9891	VPS37B	CHFR	ANKLE2	CCDC92	WSB2	PRKAB1	AACS	P2RX4	MLEC	CLIP1	BCL7A	PUS1	SCARB1
ov.tcga	null
Top genes:	VPS37B:1	CHFR:1	ANKLE2:1	CCDC92:1	WSB2:1	PRKAB1:1	AACS:1	P2RX4:1	MLEC:1	CLIP1:1	BCL7A:1	PUS1:1	SCARB1:1	___7158:1	___7159:1	___7160:1	___7161:1	___7162:1	___7163:1	___7164:1
100	ID266	1
brca.gse2034	null
brca.tcga	null
coad.gse14333	null
coad.tcga	null
ov.gse9891	CD1C	FCER1A	CD1A	CD207	CD1E	FCGBP	CX3CR1	HPGDS	PLEK2	S100B
ov.tcga	null
Top genes:	CD1C:1	FCER1A:1	CD1A:1	CD207:1	CD1E:1	FCGBP:1	CX3CR1:1	HPGDS:1	PLEK2:1	S100B:1	___5793:1	___5794:1	___5795:1	___5796:1	___5797:1	___5798:1	___5799:1	___5800:1	___5801:1	___5802:1
101	ID334	1
brca.gse2034	null
brca.tcga	null
coad.gse14333	null
coad.tcga	KRT15	DST	HMGA2	OSBPL3	RUNX1	STX1A	KRT13	NR2F1	ITGB8	CREB5	RND3	B4GALT5
ov.gse9891	null
ov.tcga	null
Top genes:	KRT15:1	DST:1	HMGA2:1	OSBPL3:1	RUNX1:1	STX1A:1	KRT13:1	NR2F1:1	ITGB8:1	CREB5:1	RND3:1	B4GALT5:1	___4851:1	___4852:1	___4853:1	___4854:1	___4855:1	___4856:1	___4857:1	___4858:1
102	ID362	1
brca.gse2034	null
brca.tcga	null
coad.gse14333	null
coad.tcga	null
ov.gse9891	SH3GL3	CEL	CELP	MARK1	LY6H	C1orf115	FAM134B	UPK1A	TRIM68	WNT5B	SLC7A8	GJA4
ov.tcga	null
Top genes:	SH3GL3:1	CEL:1	CELP:1	MARK1:1	LY6H:1	C1orf115:1	FAM134B:1	UPK1A:1	TRIM68:1	WNT5B:1	SLC7A8:1	GJA4:1	___6678:1	___6679:1	___6680:1	___6681:1	___6682:1	___6683:1	___6684:1	___6685:1
103	ID379	1
brca.gse2034	null
brca.tcga	null
coad.gse14333	null
coad.tcga	null
ov.gse9891	ROBO1	GBE1	HOMER1	STC1	SLC12A2	DUSP14	SLC39A8	KCNK1	SLFN12	SNTB1
ov.tcga	null
Top genes:	ROBO1:1	GBE1:1	HOMER1:1	STC1:1	SLC12A2:1	DUSP14:1	SLC39A8:1	KCNK1:1	SLFN12:1	SNTB1:1	___6594:1	___6595:1	___6596:1	___6597:1	___6598:1	___6599:1	___6600:1	___6601:1	___6602:1	___6603:1
[truncated: 1 more columns]
