# Supplementary material for: Biomolecular Events in Cancer Revealed by Attractor Metagenes
Source: PLoS Comput Biol. 2013 Feb 21;9(2):e1002920. doi: 10.1371/journal.pcbi.1002920 (PMC3581797; doi:10.1371/journal.pcbi.1002920)
Supplement: Text S3 — Pseudo-code for attractor metagene finding algorithm. (DOCX) [file pcbi.1002920.s010.docx]

**Supplementary Text S3:** Pseudo-code of attractor metagene finding algorithm

1. Start from a seed gene .
2. Calculate the associations between each gene and
3. Create a metagene using the weighted average of all the genes, with the weights being a function of , i.e.,
4. Given metagene , calculate the associations between metagene and each gene
5. Create metagene using
6. Repeat iteration until , or until a preset maximum iteration number is reached.
7. The converged is the attractor metagene given by
